# Supplementary material for: Theoretical investigation on the ligands constructed from phenanthroline and five-membered N-heterocyclic rings for bonding and separation properties of Am(iii) and Eu(iii)
Source: Royal Society of Chemistry journal article supplement (doi:10.1039/d3cp05101c), 2023-12-12
Supplement: d3cp05101c2.pdf [file d3cp05101c2.pdf]

# Theoretical Investigation on the Ligands Constructed from Phenanthroline and Five-Membered N-Heterocyclic Rings for Separation of Am(III) and Eu(III)

Shouqiang Wu<sup>a</sup>, An Yong Li<sup>a1</sup>

1. The results and discussion for isolated phenanthroline and N-heterocyclic rings. (P 1-4)
2. Effects of spin-orbit coupling on compounds (P 4)
3. Fig. S1 to S6 mentioned in the section "Isolated phenanthroline and N-heterocyclic rings" (P4-7)
4. Tables S1 to S13 referred to in the section "Isolated phenanthroline and N-heterocyclic rings" (P8-13)
5. Fig.S7-S13 (P14-19)
6. Table S14-S30 (P20-30)
7. Cartesian coordinates(P31)

## Isolated phenanthroline and N-heterocyclic rings

The molecular properties of isolated phenanthroline and five-membered N-heterocyclic rings  $R_1\sim R_8$  were evaluated by using electronic structure calculations. Several indicators are used to describe the molecular properties of Ph and  $R_1\sim R_8$ , including electrostatic potential (ESP), natural atomic charges of coordinating N atoms, HOMO energy, and protonation energy, which are calculated at the PBE0/6-311G(d) level and listed in **Table S1**. It is notable that  $R_1\sim R_3$  are constitutional isomers,  $R_2(R_3)$  are more stable than  $R_1$  by 9.98 kcal/mol, and that  $R_4\sim R_8$  are also constitutional isomers, among which  $R_7(R_8)$  is the most stable, and from  $R_4$  to  $R_5$  to  $R_6$  to  $R_7(R_8)$  their energies go down successively by 5.33, 4.71 and 7.53 kcal/mol, respectively. Thus, the N-N and N-N-N structures are not conducive to molecular stabilization. Since the bonding interaction between the *f*-element and ligand is mainly ionic in nature, the ESP of the ligand can be used to measure coordination ability of the ligand with the lanthanides and actinides. The ESP values of the ligand are mapped onto electron density isosurface ( $0.002e/\text{\AA}^3$ ) by various colors in **Fig.S1**. The ESP minimum of  $R_1\sim R_8$  is located at the site of the N atom, and the ESP minimum of Ph is situated at the intersection of the two symmetry axes of the two pyridines through the N atom, as shown in **Fig.S1**, which are deemed as the coordination sites with the metal. The bidentate ligand Ph has much more negative ESP minimum than the monodentate ligand  $R_1\sim R_8$ , owing to the synergistic effect between the two pyridine N atoms, so its coordination capacity is certainly much stronger than  $R_1\sim R_8$ . And the coordination ability of the monodentate ligand  $R_1\sim R_8$  reduces according to the order of  $R_6 > R_2(R_3) > R_4 > R_7(R_8) > R_1 > R_5$ , as shown by the ESP minima in **Table S1**. The charge on the coordinated N atom is the highest in  $R_7(R_8)$ , followed by  $R_2(R_3)$ , the third is Ph, and the charges on the coordinated N atom of the other ligands are close to each other. There is no apparent relationship between the ESP and  $q(N)$ . ESP is a physical observable and determined by the overall charge distribution of the molecule and reflects the ability of a molecule participating in electrostatic interaction, while the atomic charges have none of these properties.

---

<sup>1</sup>Corresponding author: An Yong Li

E-mail: aylifnsy@swu.edu.cn, [ayli001@swu.edu.cn](mailto:ayli001@swu.edu.cn)

<sup>a</sup> School of Chemistry and Chemical Engineering, Southwest University, Chongqing 400715, P.R.China

The extraction process of lanthanides and actinides is carried out under acidic conditions, the weakly alkaline extractants are easy to protonate. Protonation free energy  $\Delta G$  was evaluated for the reaction equation  $L + [H_3O]^+ = [LH]^+ + H_2O$  in aqueous phase, and listed in **Table S1**. It can be observed that the N atoms on Ph are more prone to protonation than  $R_1 \sim R_8$ . The protonation energy of the coordination N atoms on  $R_1$  to  $R_8$  is very close, so their protonation tendency is similar. In general, these monodentate ligands  $R_1 \sim R_8$  and bidentate ligand Ph have a high protonation tendency.

The most important indicator reflecting property of the ligands is the interaction energy between the ligands and the Am(III) and Eu(III) ions in their complexes. In the gas phase, the 1:1 complexes of the monodentate ligands  $R_1 \sim R_8$  with Am/Eu are unstable, so we calculate the 1:2 complexes  $R_iMR_i^{3+}$  formed by  $M^{3+}$  with two identical ring  $R_i$  ( $i = 1 \sim 8$ ). The complexes  $R_iMR_i^{3+}$  have *cis-trans* isomers, here we only consider the *trans*-isomers. The geometry structures optimized for  $MPh^{3+}$  and  $R_iMR_i^{3+}$  at the PBE0/6-311G(d)-RECP level are shown in **Fig.S2**. The interaction energy in  $R_iMR_i^{3+}$  is  $\Delta E = [E(R_iMR_i^{3+}) - E(M^{3+}) - 2E(R_i)]/2$ . The calculated energy for each M-N interaction is about 128 ~ 200 kcal/mol, as shown in **Table S2**. It is found that  $R_2(R_3)$  has the most strong interaction with both Am(III) and Eu(III) ions, the interaction strength of these ligands with Am and Eu follows the same order  $R_2(R_3) > R_6 > R_1 > R_4 > R_7(R_8) > R_5$ . It is notable that the Am-N bond length is significantly smaller than the corresponding Eu-N bond length and the Am-N bond order (WBI values) is also larger than that of the corresponding Eu-N bond, while the interaction energy of Am(III) ion with the N-donor is smaller than that of Eu(III) ion by about 20kcal/mol for  $R_1$  to  $R_4$ , or 17kcal/mol for  $R_6$  to  $R_8$ . This inconsistency between bond length, bond order, and interaction energy will be explained later.

It has been shown that the solvation has significant effects on the interaction of lanthanides and actinides with ligand. Here we consider two solvents, water and n-Octanol, for the 1:1 complexes  $MR_i^{3+}$  of the Am(III) and Eu(III) with the monodentate ligands  $R_i$  ( $i = 1 \sim 8$ ). The model chemistry also has great influence on the prediction of the metal-ligand interaction, here we consider three quantum chemistry theoretical methods, DFT methods with quasi-relativistic effective core potentials (QRECP), ZORA (Zero Order Regular Approximation) and DKH (Douglas Kroll Hess) methods.

In the DFT calculation with QRECP, the functionals also have significant effects on the calculated results, so we take a series of functionals to perform DFT calculation, including the exchange- correlation functionals BP86 and PBE, and the hybridized functionals TPSSH, B3LYP, PBE0 and M06-2X. For the 1:1 complexes  $MR_i^{3+}$  ( $i = 1 \sim 8$ ) of the metal with the monodentate ligands  $R_i$ , we consider two structures, one is the global minima, the other is the constrained minima, thus the minima with the M-N-C angle constrained to approximate the  $M^{3+}$  location observed in the complex  $M(PhR_i)^{3+}$  of  $M^{3+}$  with the tridentate ligand  $PhR_i$ . For  $MR_6^{3+}$  the two structures have obvious difference, while for the other complexes  $MR_i^{3+}$  ( $i \neq 6$ ) the two structures have small difference. For the global minima, the M-N bond length and the interaction energy between  $M^{3+}$  and  $R_i$  in the optimized structure by the various functionals in the aqueous phase were listed in **Tables S3 and S4** and shown in **Fig.S3**. For the constrained minima, we optimized the structures of the complexes  $MR_i^{3+}$  ( $i = 1 \sim 8$ ) in the aqueous phase and n-octanol phase using DFT method with various functionals, the results of the aqueous phase are shown in **Fig.S4** and in **Tables S5 and S6**, and the results of the n-octanol phase are shown in **Fig.S5** and in **Tables S7 and S8**.

We first consider the results of the **constrained** minima in the **aqueous** phase. For the Am complexes  $AmR_i^{3+}$ , the bond lengths and bonding energies given by various functionals are quite consistent with the ESP of the ligands, thus  $AmR_2^{3+}$  and  $AmR_6^{3+}$  have the shortest Am-N bond length and the greatest bonding energy, while  $AmR_5^{3+}$  has the longest Am-N bond length and the least bonding energy, as shown in **Fig.S4** and **Tables S5-S6**. Moreover the variation law of the bond length and bonding

energy across the series of  $R_1\sim R_8$  are also consistent for various functionals, except that B3LYP gives a quite large Am-N bond length for  $AmR_5^{3+}$ . For the Eu complexes  $EuR_i^{3+}$ , there are some obvious difference from the  $AmR_i^{3+}$  complexes. The variation laws of the bonding energies given by various functionals are consistent with each other,  $EuR_2^{3+}$  has the greatest bonding energy and  $EuR_5^{3+}$  has the least bonding energy, while the bonding energy of  $EuR_6^{3+}$  is always less than that of  $EuR_1^{3+}$  for the various functionals except for PBE0. The Eu-N bond lengths given by various functionals are very inconsistent, only the BP86 and PBE functionals produce Eu-N bond lengths consistent with the ESP of the ligands, all the hybridized functionals can not give bond lengths consistent with ESP. It is worth noting that although the bonding energy in the solution phase is much smaller than that in the gas phase due to the solvent effect, in the solution phase the bonding energy of Am-ligand bond is still less than that of Eu-ligand bond, similar to the gas phase. This should be a general feature of DFT calculations with quasi-relativistic effective potentials, regardless of the functional used. For the results of the global minima of the aqueous phase in **Fig.S3** and in **Tables S3 and S4**, except that the bond lengths have some inconsistent with the results of the constrained minima in the aqueous phase, the bonding energies of the global minima and constrained minima are consistent with each other. The influence of solvent effect on bond length and bond energy is obvious. For the constrained minima, although the results of the n-octanol phase have much similar characters to the results of the aqueous phase, we can still observe their obvious difference. For example, the consistency between the different functionals in the n-octanol phase gets worse, and the bond energy of the n-octanol phase is more than 10kcal/mol higher than that of the aqueous phase, as shown in **Fig.S5** and in **Tables S5 and S6**.

That the Am-ligand bonding energy predicted by DFT-RECP method is smaller than the Eu-ligand bond energy is quite unreasonable and inconsistent with the bond lengths, bond order and electron density topological properties (QTAIM parameters). To improve this situation, we perform relativistic quantum chemistry calculations using the ZORA and DKH methods. The calculated bond lengths and bonding energies of the Am-N and Eu-N bonds are shown in **Tables S9 and S10**, and also plotted in **Fig.S6**, and the corresponding QTAIM parameters are listed in **Table S11**. For comparison purposes, we have also included the results of DFT-RECP with PBE0 functional in these graphs and tables. The ZORA and DKH methods predicted much larger bonding energy than DFT-RECP-PBE0 method. For the Eu complexes  $EuR_i^{3+}$ , the DKH bonding energy is very close to the ZORA bonding energy, the former is only 2kcal/mol less than the later. However, for the Am complexes  $AmR_i^{3+}$ , the DKH bonding energy is much larger than the ZORA bonding energy, by at least 200 kcal/mol. It can be seen that the ZORA bonding energy of the Am-ligand bond is still less than the ZORA bonding energy of the Eu-ligand bond, similar to the DFT-RECP method, while the Am-ligand bonding energy predicted by DKH method is much larger than the corresponding Eu-ligand bonding energy. Therefore, DKH method predicted bonding energy consistent with bond length, while the ZORA and DFT-RECP methods fail to do this. From **Fig.S6(a) and (c)** and **Table S9**, we can see that the ZORA and DKH methods predicted much shorter Am-N bond than the DFT-RECP method except for the  $AmR_2^{3+}$  complex, while the Eu-N bond length predicted by ZORA and DKH methods is larger than that by DFT-RECP method except for the  $EuR_1^{3+}$  complex. It is worth noting that the Eu-N bond lengths predicted by ZORA and DKH are very close to each other, while the Am-N bond length predicted by DKH is smaller than that predicted by ZORA. So we note that there are significant differences in the treatment of Am and Eu by ZORA and DKH methods.

The QTAIM parameters,  $\rho$  and  $\nabla^2\rho$  and  $H$  at the Am-N BCPs calculated by the ZORA and DKH methods, are much larger than those by DFT-RECP method, and the ZORA and DKH methods give very

close results, as shown in **Table S11**. The ZORA and DKH methods predict stronger and more covalent Am-N bond than the DFT-RECP method. However, for the Eu-N bond, the ZORA and DKH give a BCP electron density something less than that of DFT-RECP. Anyway, the three methods are consistent in predicting the nature of Am-N and Eu-N bonds, that is, both Am-N and Eu-N bonds are mainly ionic in nature, and the covalence of Am-N bond is higher than that of Eu-N bond.

### Effects of spin-orbit coupling on compounds

To understand the impact of spin-orbit coupling in the interaction between Americium and the ligands, optimizations of the  $\text{AmR}_4\text{PhR}_4(\text{NO}_3)_3$  compound were performed at the PBE0/ZORA theoretical level considering both spin-orbit coupling (SOC) and non-spin-orbit coupling (NOSOC) interactions. The obtained N-Am bond lengths, QTAIM properties, and Mayer bond orders are summarized in the **Table S12**. Notably, considering SOC interactions resulted in an average bond length for N-Am that was shorter by 0.0006 Å compared to when SOC interactions were not considered. However, the differences in QTAIM properties such as  $\rho$ ,  $\nabla^2\rho$ ,  $H(r)$ , and Mayer bond orders were not significantly distinct. Overall, the covalency of N-Am under SOC consideration appeared slightly higher than without SOC, although this increase in covalency was not distinctly pronounced. Additionally, single-point energies  $E(\text{a.u.})$  and free energies  $G(\text{a.u.})$  were calculated for the  $\text{AmR}_4\text{PhR}_4(\text{NO}_3)_3$  compound under both spin-orbit coupling (SOC) and non-spin-orbit coupling (NOSOC) interactions (**Table S13**). The energy difference ( $\Delta E$  in kcal/mol) and free energy difference ( $\Delta G$  in kcal/mol) indicate that spin-orbit interactions contribute minimally to energy and Gibbs free energy calculations. Kaneko et al. also confirmed the negligible contribution of spin-orbit coupling effects to Gibbs energy calculations for complex formation reactions (less than 0.005 kcal/mol) (Inorg. Chem. 2018, 57, 14513-14523)

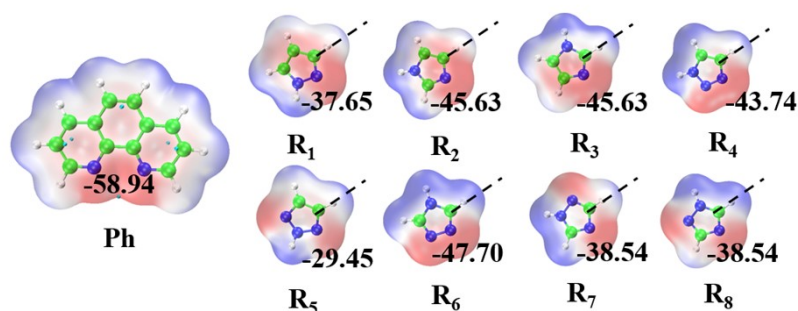

**Fig. S1** ESP (kcal/mol) mapped onto the electron density isosurface ( $0.002\text{e}/\text{\AA}^3$ ) for the free ligands phenanthroline and  $\text{R}_1\text{-R}_8$

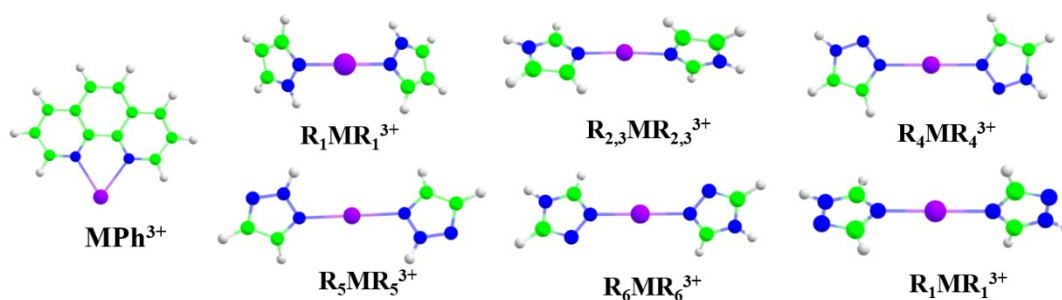

Fig. S2 Optimized structures of  $MPh^{3+}$  and  $R_iMR_i^{3+}$  in gas phase at PBE0/6-311G(d)-RECP

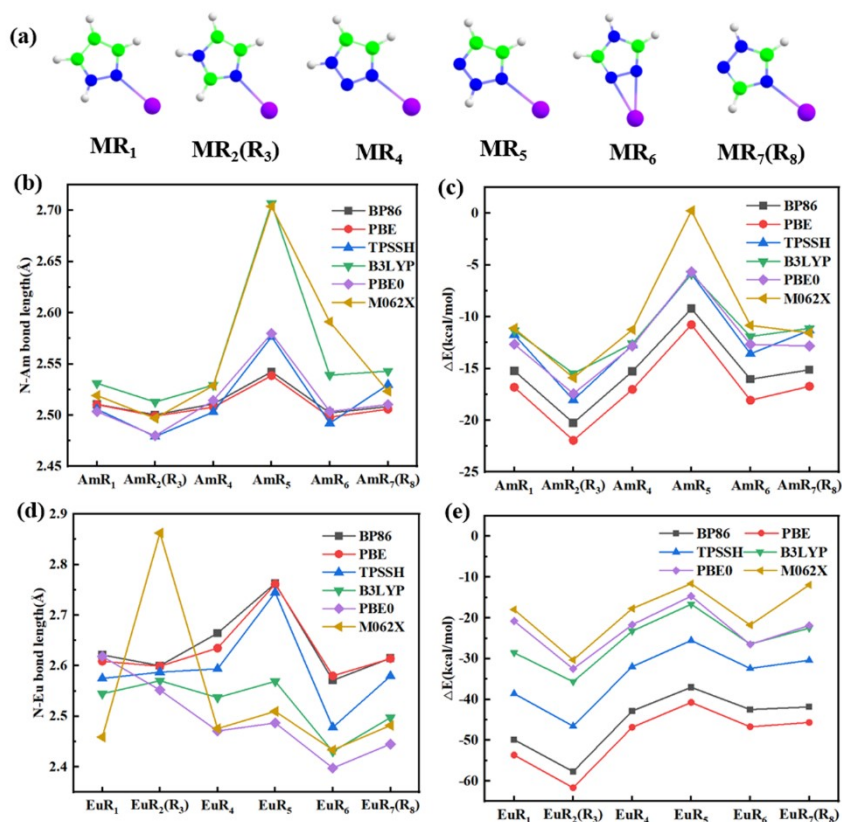

Fig. S3 (a) Optimized geometries, (b, d) N-M (M=Am, Eu) bond length and (c, e) interaction energies (kcal/mol) for **global minima** of the complexes  $MR_i^{3+}$  ( $i = 1\sim 8$ ) calculated by using several DFT methods with the 6-311G(d)/RECP basis set using the CPCM solvation model in aqueous phase

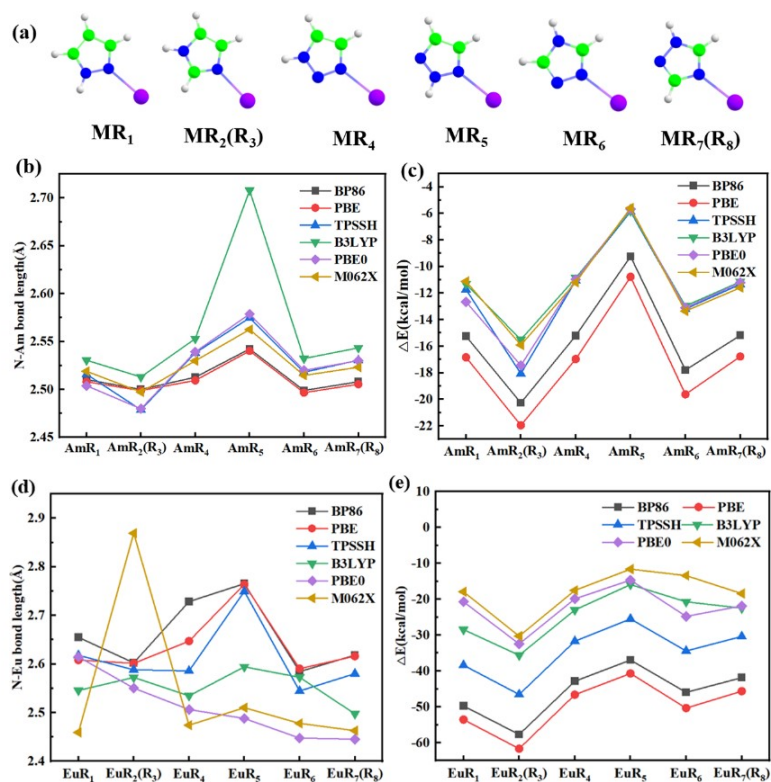

**Fig. S4** (a) Optimized geometries, (b, d) N-M (M=Am, Eu) bond length (Å) and (c, e) interaction energies (kcal/mol) for the **constrained** minima of the complexes  $MR_i^{3+}$  ( $i = 1\sim 8$ ) with the M-N-C angle to approximate the  $M^{3+}$  location observed in the complex  $M(\text{PhR}_i)^{3+}$  calculated by using several DFT functionals with the 6-311G(d)/RECP basis set and the CPCM solvation model in **aqueous** phase

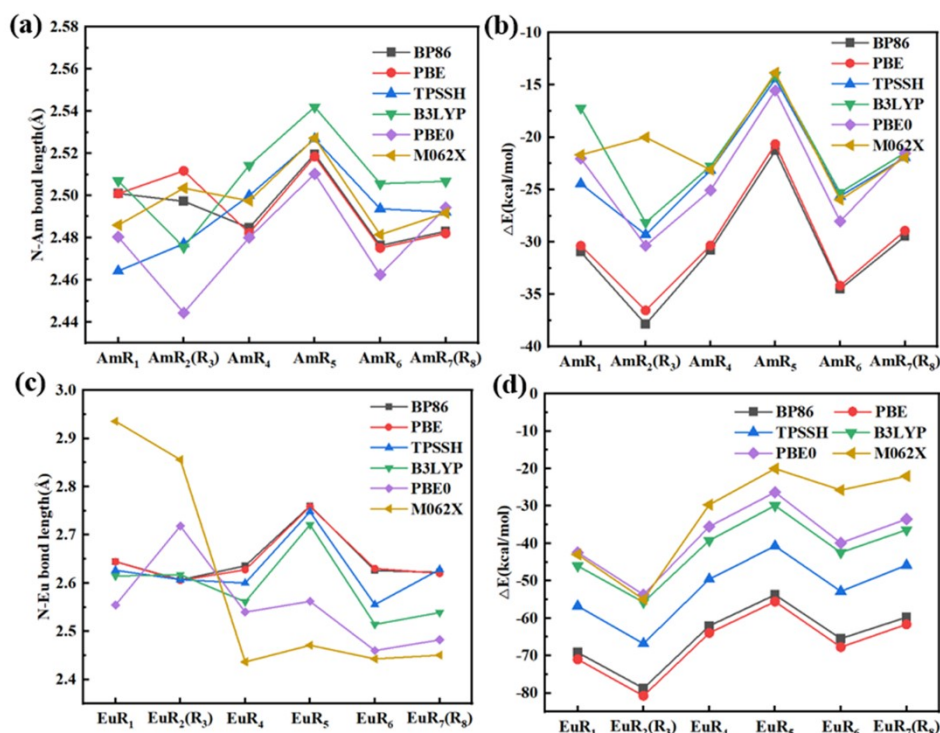

**Fig. S5** (a, c) N-M (M=Am, Eu) bond length and (b, d) interaction energies (kcal/mol) for the **constrained** minima of the complexes  $MR_i^{3+}$  ( $i = 1\sim 8$ ) with the M-N-C angle to approximate the  $M^{3+}$  location observed in the complex  $M(\text{PhR}_i)^{3+}$  calculated by using several DFT functionals with the 6-311G(d)/RECP basis set using the CPCM solvation model in **n-octanol** phase

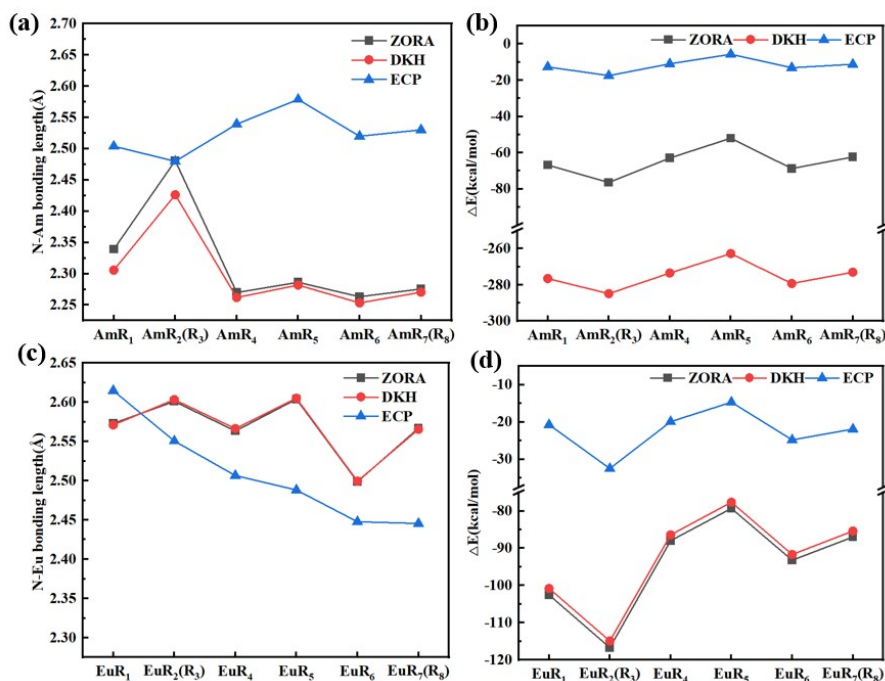

**Fig. S6** (a, c) Am-N and Eu-N bond lengths (Å) and (b, d) bonding energies (kcal/mol) of the M-ligand interaction for the constrained minima of the  $MR_i^{3+}$  complexes ( $i = 1\sim 8$ ) with the M-N-C angle constrained to approximate the  $M^{3+}$  location observed in the complex  $M(\text{PhR}_i)^{3+}$  calculated by using the PBE0/ZORA/DKH/6-311G(d)-RECP methods and the CPCM solvation model in aqueous phase

**Table S1** Molecular energy, the ESP minima, natural atomic charges  $q(\text{N})$  of the N atom, the energy levels of HOMO and LUMO and their gap, and protonation energies of Ph and R<sub>1</sub>~R<sub>8</sub> in the gas phase calculated at the PBE0/6-311G(d) level. Protonation free energy  $\Delta\text{G}$  is the free energy change of the reaction equation  $\text{L} + [\text{H}_3\text{O}]^+ = [\text{LH}]^+ + \text{H}_2\text{O}$  in aqueous phase.

|                                  | E(a.u.)     | HOMO    | LUMO    | gap    | ESP(kcal/mol) | $q(\text{N})$ | $\Delta\text{G}(\text{kcal/mol})$ |
|----------------------------------|-------------|---------|---------|--------|---------------|---------------|-----------------------------------|
| Ph                               | -571.051755 | -6.6969 | -1.4919 | 5.2050 | -58.94        | -0.4201       | -189.8                            |
| R <sub>1</sub>                   | -225.987774 | -7.1055 | 0.7012  | 7.8067 | -37.65        | -0.2892       | -157.4                            |
| R <sub>2</sub> (R <sub>3</sub> ) | -226.003750 | -6.5677 | 0.9357  | 7.5034 | <b>-45.63</b> | -0.4952       | -154.3                            |
| R <sub>4</sub>                   | -242.004456 | -7.6516 | 0.0386  | 7.6903 | -43.74        | -0.2612       | -159.2                            |
| R <sub>5</sub>                   | -242.012921 | -7.9209 | -0.0335 | 7.8875 | <b>-29.45</b> | -0.2641       | -159.3                            |
| R <sub>6</sub>                   | -242.020442 | -7.3524 | 0.5187  | 7.8711 | -47.70        | -0.2993       | -153.7                            |
| R <sub>7</sub> (R <sub>8</sub> ) | -242.032402 | -7.8042 | 0.2508  | 8.0550 | -38.54        | -0.5140       | -154.6                            |

**Table S2** Interaction energies  $\Delta\text{E}$  (kcal/mol), bond lengths  $r(\text{N-M})$  (Å), and bond orders (WBIs) between M and N in the complexes  $\text{MPh}^{3+}$  and  $\text{R}_i\text{MR}_i^{3+}$  in the gas phase calculated at PBE0/6-311G(d)-RECP.

| Ligands                          | $\Delta\text{E}(\text{Am})$ | $\Delta\text{E}(\text{Eu})$ | $r(\text{N-Am})$ | $r(\text{N-Eu})$ | WBI(N-Am) | WBI(N-Eu) |
|----------------------------------|-----------------------------|-----------------------------|------------------|------------------|-----------|-----------|
| Ph                               | -345.6                      | -388.3                      | 2.549            | 2.565            | 0.0903    | 0.0651    |
| R <sub>1</sub>                   | -165.1                      | -184.5                      | 2.437            | 2.616            | 0.1764    | 0.0655    |
| R <sub>2</sub> (R <sub>3</sub> ) | -179.5                      | -200.4                      | 2.541            | 2.603            | 0.0994    | 0.0645    |
| R <sub>4</sub>                   | -164.1                      | -183.4                      | 2.306            | 2.630            | 0.2898    | 0.0549    |
| R <sub>5</sub>                   | -138.3                      | -159.2                      | 2.600            | 2.705            | 0.0928    | 0.0536    |
| R <sub>6</sub>                   | -171.7                      | -188.7                      | 2.309            | 2.600            | 0.2732    | 0.0600    |
| R <sub>7</sub> (R <sub>8</sub> ) | -155.2                      | -171.6                      | 2.334            | 2.663            | 0.2684    | 0.0568    |

**Table S3** N-M (M=Am, Eu) bond length for global minima of the complexes  $\text{MR}_i^{3+}$  ( $i = 1\sim 8$ ) calculated by using several DFT methods with the 6-311G(d)/RECP basis set using the CPCM solvation model in aqueous phase

| Complexes                          | BP86  | PBE   | TPSSH | B3LYP | PBE0  | M062X |
|------------------------------------|-------|-------|-------|-------|-------|-------|
| AmR <sub>1</sub>                   | 2.511 | 2.510 | 2.506 | 2.531 | 2.504 | 2.519 |
| AmR <sub>2</sub> (R <sub>3</sub> ) | 2.500 | 2.499 | 2.479 | 2.513 | 2.480 | 2.497 |
| AmR <sub>4</sub>                   | 2.511 | 2.508 | 2.503 | 2.529 | 2.514 | 2.529 |
| AmR <sub>5</sub>                   | 2.542 | 2.539 | 2.577 | 2.707 | 2.580 | 2.704 |
| AmR <sub>6</sub>                   | 2.502 | 2.498 | 2.492 | 2.539 | 2.504 | 2.591 |
| AmR <sub>7</sub> (R <sub>8</sub> ) | 2.508 | 2.506 | 2.530 | 2.543 | 2.510 | 2.523 |
| Complexes                          | BP86  | PBE   | TPSSH | B3LYP | PBE0  | M062X |
| EuR <sub>1</sub>                   | 2.621 | 2.609 | 2.575 | 2.545 | 2.619 | 2.459 |
| EuR <sub>2</sub> (R <sub>3</sub> ) | 2.600 | 2.599 | 2.587 | 2.570 | 2.552 | 2.862 |
| EuR <sub>4</sub>                   | 2.665 | 2.635 | 2.594 | 2.537 | 2.471 | 2.476 |
| EuR <sub>5</sub>                   | 2.763 | 2.761 | 2.745 | 2.569 | 2.487 | 2.510 |
| EuR <sub>6</sub>                   | 2.571 | 2.580 | 2.478 | 2.430 | 2.398 | 2.434 |



|                                    |       |       |       |       |       |       |
|------------------------------------|-------|-------|-------|-------|-------|-------|
| EuR <sub>7</sub> (R <sub>8</sub> ) | 2.615 | 2.614 | 2.580 | 2.498 | 2.445 | 2.482 |
|------------------------------------|-------|-------|-------|-------|-------|-------|

**Table S4** N-M (M=Am, Eu) interaction energies (kcal/mol) for **global minima** of the complexes MR<sub>*i*</sub><sup>3+</sup> (*i* = 1~8) calculated by using several DFT methods with the 6-311G(d)/RECP basis set using the CPCM solvation model in **aqueous phase**

| Complexes                          | BP86  | PBE   | TPSSH | B3LYP | PBE0  | M062X |
|------------------------------------|-------|-------|-------|-------|-------|-------|
| AmR <sub>1</sub>                   | -15.2 | -16.8 | -11.7 | -11.3 | -12.7 | -11.1 |
| AmR <sub>2</sub> (R <sub>3</sub> ) | -20.3 | -21.9 | -18.0 | -15.5 | -17.4 | -15.9 |
| AmR <sub>4</sub>                   | -15.3 | -17.0 | -12.7 | -12.6 | -12.8 | -11.2 |
| AmR <sub>5</sub>                   | -9.2  | -10.8 | -5.9  | -5.9  | -5.7  | 0.2   |
| AmR <sub>6</sub>                   | -16.0 | -18.1 | -13.6 | -11.9 | -12.7 | -10.8 |
| AmR <sub>7</sub> (R <sub>8</sub> ) | -15.1 | -16.7 | -11.3 | -11.1 | -12.8 | -11.6 |
| Complexes                          | BP86  | PBE   | TPSSH | B3LYP | PBE0  | M062X |
| EuR <sub>1</sub>                   | -49.9 | -53.7 | -38.6 | -28.6 | -20.8 | -18.0 |
| EuR <sub>2</sub> (R <sub>3</sub> ) | -57.7 | -61.7 | -46.6 | -35.7 | -32.5 | -30.3 |
| EuR <sub>4</sub>                   | -42.8 | -46.8 | -32.0 | -23.2 | -21.7 | -17.7 |
| EuR <sub>5</sub>                   | -37.0 | -40.7 | -25.6 | -16.7 | -14.7 | -11.6 |
| EuR <sub>6</sub>                   | -42.5 | -46.7 | -32.4 | -26.4 | -26.5 | -21.8 |
| EuR <sub>7</sub> (R <sub>8</sub> ) | -41.8 | -45.6 | -30.4 | -22.5 | -21.9 | -11.9 |

**Table S5** Am-M and Eu-N bond lengths for the **constrained** minima of the complexes MR<sub>*i*</sub><sup>3+</sup> (*i* = 1~8) with the M-N-C angle to approximate the M<sup>3+</sup> location observed in the complex M(PhR<sub>*i*</sub>)<sup>3+</sup> calculated by using several DFT functionals with the 6-311G(d)/RECP basis set and the CPCM solvation model in **aqueous phase**

| Complexes                          | BP86  | PBE   | TPSSH | B3LYP | PBE0  | M062X |
|------------------------------------|-------|-------|-------|-------|-------|-------|
| AmR <sub>1</sub> <sup>3+</sup>     | 2.510 | 2.508 | 2.516 | 2.531 | 2.504 | 2.519 |
| AmR <sub>2</sub> (R <sub>3</sub> ) | 2.500 | 2.499 | 2.479 | 2.513 | 2.480 | 2.497 |
| AmR <sub>4</sub>                   | 2.513 | 2.510 | 2.538 | 2.553 | 2.539 | 2.530 |
| AmR <sub>5</sub>                   | 2.542 | 2.540 | 2.575 | 2.708 | 2.579 | 2.563 |
| AmR <sub>6</sub>                   | 2.499 | 2.497 | 2.518 | 2.532 | 2.520 | 2.515 |
| AmR <sub>7</sub> (R <sub>8</sub> ) | 2.508 | 2.506 | 2.531 | 2.544 | 2.530 | 2.523 |
| Complexes                          | BP86  | PBE   | TPSSH | B3LYP | PBE0  | M062X |
| EuR <sub>1</sub>                   | 2.655 | 2.608 | 2.618 | 2.546 | 2.615 | 2.459 |
| EuR <sub>2</sub> (R <sub>3</sub> ) | 2.602 | 2.601 | 2.588 | 2.573 | 2.551 | 2.869 |
| EuR <sub>4</sub>                   | 2.729 | 2.647 | 2.586 | 2.535 | 2.507 | 2.474 |
| EuR <sub>5</sub>                   | 2.765 | 2.764 | 2.749 | 2.594 | 2.488 | 2.510 |
| EuR <sub>6</sub>                   | 2.584 | 2.591 | 2.545 | 2.573 | 2.448 | 2.478 |
| EuR <sub>7</sub> (R <sub>8</sub> ) | 2.618 | 2.616 | 2.580 | 2.498 | 2.446 | 2.463 |

**Table S6** The metal-ligand interaction energies (kcal/mol) for the **constrained** minima of the complexes  $MR_i^{3+}$  ( $i = 1\sim 8$ ) with the M-N-C angle constrained to approximate the  $M^{3+}$  location observed in the complex  $M(PhR_i)^{3+}$  calculated by using several DFT functionals with the 6-311G(d)/RECP basis set and the CPCM solvation model in **aqueous** phase

| Complexes                          | BP86  | PBE   | TPSSH | B3LYP | PBE0  | M062X |
|------------------------------------|-------|-------|-------|-------|-------|-------|
| AmR <sub>1</sub>                   | -15.3 | -16.8 | -11.7 | -11.3 | -12.7 | -11.1 |
| AmR <sub>2</sub> (R <sub>3</sub> ) | -20.3 | -22.0 | -18.1 | -15.5 | -17.5 | -15.9 |
| AmR <sub>4</sub>                   | -15.2 | -17.0 | -11.1 | -10.9 | -11.0 | -11.2 |
| AmR <sub>5</sub>                   | -9.2  | -10.8 | -5.9  | -5.8  | -5.7  | -5.6  |
| AmR <sub>6</sub>                   | -17.8 | -19.6 | -13.2 | -13.0 | -13.1 | -13.4 |
| AmR <sub>7</sub> (R <sub>8</sub> ) | -15.2 | -16.8 | -11.3 | -11.2 | -11.2 | -11.6 |
|                                    | BP86  | PBE   | TPSSH | B3LYP | PBE0  | M062X |
| EuR <sub>1</sub>                   | -49.8 | -53.6 | -38.4 | -28.5 | -20.7 | -17.9 |
| EuR <sub>2</sub> (R <sub>3</sub> ) | -57.7 | -61.7 | -46.6 | -35.6 | -32.5 | -30.3 |
| EuR <sub>4</sub>                   | -42.9 | -46.6 | -31.7 | -23.0 | -19.9 | -17.6 |
| EuR <sub>5</sub>                   | -37.0 | -40.7 | -25.5 | -15.9 | -14.7 | -11.6 |
| EuR <sub>6</sub>                   | -46.0 | -50.4 | -34.5 | -20.7 | -24.8 | -13.4 |
| EuR <sub>7</sub> (R <sub>8</sub> ) | -41.9 | -45.7 | -30.4 | -22.5 | -21.9 | -18.4 |

**Table S7** Am-M and Eu-N bond lengths for the **constrained** minima of the complexes  $MR_i^{3+}$  ( $i = 1\sim 8$ ) with the M-N-C angle to approximate the  $M^{3+}$  location observed in the complex  $M(PhR_i)^{3+}$  calculated by using several DFT functionals with the 6-311G(d)/RECP basis set using the CPCM solvation model in **n-octanol** phase

| Complexes                          | BP86  | PBE   | TPSSH | B3LYP | PBE0  | M062X |
|------------------------------------|-------|-------|-------|-------|-------|-------|
| AmR <sub>1</sub>                   | 2.501 | 2.501 | 2.464 | 2.507 | 2.480 | 2.486 |
| AmR <sub>2</sub> (R <sub>3</sub> ) | 2.497 | 2.512 | 2.477 | 2.476 | 2.444 | 2.504 |
| AmR <sub>4</sub>                   | 2.485 | 2.482 | 2.500 | 2.514 | 2.480 | 2.498 |
| AmR <sub>5</sub>                   | 2.520 | 2.519 | 2.527 | 2.542 | 2.510 | 2.527 |
| AmR <sub>6</sub>                   | 2.476 | 2.475 | 2.494 | 2.506 | 2.462 | 2.482 |
| AmR <sub>7</sub> (R <sub>8</sub> ) | 2.483 | 2.482 | 2.492 | 2.507 | 2.494 | 2.492 |
|                                    | BP86  | PBE   | TPSSH | B3LYP | PBE0  | M062X |
| EuR <sub>1</sub>                   | 2.645 | 2.644 | 2.627 | 2.615 | 2.554 | 2.936 |
| EuR <sub>2</sub> (R <sub>3</sub> ) | 2.607 | 2.606 | 2.607 | 2.618 | 2.718 | 2.856 |
| EuR <sub>4</sub>                   | 2.636 | 2.628 | 2.600 | 2.561 | 2.540 | 2.437 |
| EuR <sub>5</sub>                   | 2.760 | 2.759 | 2.748 | 2.721 | 2.562 | 2.471 |
| EuR <sub>6</sub>                   | 2.626 | 2.630 | 2.555 | 2.515 | 2.460 | 2.443 |
| EuR <sub>7</sub> (R <sub>8</sub> ) | 2.623 | 2.620 | 2.628 | 2.539 | 2.483 | 2.451 |

**Table S8** The metal-ligand interaction energies (kcal/mol) for the **constrained** minima of the complexes  $MR_i^{3+}$  ( $i = 1\sim 8$ ) with the M-N-C angle constrained to approximate the  $M^{3+}$  location observed in the complex  $M(PhR_i)^{3+}$  calculated by using several DFT functionals with the 6-311G(d)/RECP basis set using the CPCM solvation model in **n-octanol** phase

| Complexes                          | BP86  | PBE   | TPSSH | B3LYP | PBE0  | M062X |
|------------------------------------|-------|-------|-------|-------|-------|-------|
| AmR <sub>1</sub>                   | -31.0 | -30.4 | -24.4 | -17.2 | -22.0 | -21.7 |
| AmR <sub>2</sub> (R <sub>3</sub> ) | -37.9 | -36.5 | -29.3 | -28.1 | -30.4 | -20.0 |
| AmR <sub>4</sub>                   | -30.8 | -30.3 | -23.2 | -22.8 | -25.1 | -23.1 |
| AmR <sub>5</sub>                   | -21.3 | -20.7 | -14.5 | -14.1 | -15.5 | -13.8 |
| AmR <sub>6</sub>                   | -34.5 | -34.2 | -25.6 | -25.3 | -28.0 | -26.0 |
| AmR <sub>7</sub> (R <sub>8</sub> ) | -29.5 | -28.9 | -21.9 | -21.5 | -21.5 | -21.9 |
|                                    | BP86  | PBE   | TPSSH | B3LYP | PBE0  | M062X |
| EuR <sub>1</sub>                   | -69.1 | -71.0 | -56.7 | -46.0 | -42.4 | -43.0 |
| EuR <sub>2</sub> (R <sub>3</sub> ) | -78.7 | -80.7 | -66.8 | -55.7 | -53.7 | -54.9 |
| EuR <sub>4</sub>                   | -62.0 | -63.9 | -49.5 | -39.2 | -35.5 | -29.7 |
| EuR <sub>5</sub>                   | -53.7 | -55.5 | -40.7 | -29.9 | -26.3 | -20.0 |
| EuR <sub>6</sub>                   | -65.4 | -67.7 | -52.8 | -42.4 | -39.9 | -25.7 |
| EuR <sub>7</sub> (R <sub>8</sub> ) | -59.7 | -61.6 | -45.8 | -36.4 | -33.5 | -22.0 |

**Table S9** Am-N and Eu-N bond lengths (Å) for the constrained minima of the MR<sub>i</sub><sup>3+</sup> complexes (*i* = 1~8) with the M-N-C angle constrained to approximate the M<sup>3+</sup> location observed in the complex M(PhR<sub>i</sub>)<sup>3+</sup> calculated by using the PBE0/ZORA/DKH/6-311G(d)-RECP methods and the CPCM solvation model in aqueous phase

|                                    | ECP   | ZORA  | DKH   |                                    | ECP   | ZORA  | DKH   |
|------------------------------------|-------|-------|-------|------------------------------------|-------|-------|-------|
| AmR <sub>1</sub>                   | 2.504 | 2.339 | 2.306 | EuR <sub>1</sub>                   | 2.615 | 2.573 | 2.571 |
| AmR <sub>2</sub> (R <sub>3</sub> ) | 2.480 | 2.481 | 2.426 | EuR <sub>2</sub> (R <sub>3</sub> ) | 2.551 | 2.601 | 2.603 |
| AmR <sub>4</sub>                   | 2.539 | 2.270 | 2.262 | EuR <sub>4</sub>                   | 2.507 | 2.563 | 2.566 |
| AmR <sub>5</sub>                   | 2.579 | 2.286 | 2.282 | EuR <sub>5</sub>                   | 2.488 | 2.604 | 2.605 |
| AmR <sub>6</sub>                   | 2.520 | 2.263 | 2.253 | EuR <sub>6</sub>                   | 2.448 | 2.499 | 2.500 |
| AmR <sub>7</sub> (R <sub>8</sub> ) | 2.530 | 2.276 | 2.271 | EuR <sub>7</sub> (R <sub>8</sub> ) | 2.446 | 2.567 | 2.565 |

**Table S10** Bonding energies (kcal/mol) of the M-ligand interaction for the constrained minima of the MR<sub>i</sub><sup>3+</sup> complexes (*i* = 1~8) with the M-N-C angle constrained to approximate the M<sup>3+</sup> location observed in the complex M(PhR<sub>i</sub>)<sup>3+</sup> calculated by using the PBE0/ZORA/DKH/6-311G(d)-RECP methods and the CPCM solvation model in aqueous phase

|                                    | ECP   | ZORA  | DKH    |                                    | ECP   | ZORA   | DKH    |
|------------------------------------|-------|-------|--------|------------------------------------|-------|--------|--------|
| AmR <sub>1</sub>                   | -12.7 | -66.8 | -276.6 | EuR <sub>1</sub>                   | -20.7 | -102.5 | -100.8 |
| AmR <sub>2</sub> (R <sub>3</sub> ) | -17.5 | -76.4 | -284.9 | EuR <sub>2</sub> (R <sub>3</sub> ) | -32.5 | -116.7 | -114.9 |
| AmR <sub>4</sub>                   | -11.0 | -62.9 | -273.5 | EuR <sub>4</sub>                   | -19.9 | -88.0  | -86.4  |
| AmR <sub>5</sub>                   | -5.7  | -52.0 | -262.8 | EuR <sub>5</sub>                   | -14.7 | -79.3  | -77.7  |
| AmR <sub>6</sub>                   | -13.1 | -68.7 | -279.3 | EuR <sub>6</sub>                   | -24.8 | -93.2  | -91.7  |
| AmR <sub>7</sub> (R <sub>8</sub> ) | -11.2 | -62.3 | -273.0 | EuR <sub>7</sub> (R <sub>8</sub> ) | -21.9 | -87.0  | -85.4  |

**Table S11** Electron density  $\rho$ , Laplacian  $\nabla^2\rho$ , and local electron Energy density  $H(r)$  at the N-M BCPs in the MR<sub>i</sub><sup>3+</sup> complexes (*i* = 1~8) with the M-N-C angle constrained to approximate the M<sup>3+</sup> location observed in the complex M(PhR<sub>i</sub>)<sup>3+</sup> calculated by using the PBE0/ZORA/DKH/6-311G(d)-RECP methods and the CPCM solvation model in aqueous phase.

| $\rho$           | ECP    | ZORA   | DKH    | $\rho$           | ECP    | ZORA   | DKH    |
|------------------|--------|--------|--------|------------------|--------|--------|--------|
| AmR <sub>1</sub> | 0.0548 | 0.0810 | 0.0878 | EuR <sub>1</sub> | 0.0364 | 0.0397 | 0.0399 |

|                                    |         |         |         |                                    |         |         |         |
|------------------------------------|---------|---------|---------|------------------------------------|---------|---------|---------|
| AmR <sub>2</sub> (R <sub>3</sub> ) | 0.0593  | 0.0581  | 0.0663  | EuR <sub>2</sub> (R <sub>3</sub> ) | 0.0430  | 0.0377  | 0.0375  |
| AmR <sub>4</sub>                   | 0.0527  | 0.1005  | 0.1017  | EuR <sub>4</sub>                   | 0.0496  | 0.0416  | 0.0412  |
| AmR <sub>5</sub>                   | 0.0467  | 0.0937  | 0.0941  | EuR <sub>5</sub>                   | 0.0517  | 0.0369  | 0.0367  |
| AmR <sub>6</sub>                   | 0.0551  | 0.1020  | 0.1037  | EuR <sub>6</sub>                   | 0.0586  | 0.0486  | 0.0485  |
| AmR <sub>7</sub> (R <sub>8</sub> ) | 0.0532  | 0.0974  | 0.0980  | EuR <sub>7</sub> (R <sub>8</sub> ) | 0.0583  | 0.0408  | 0.0409  |
| $\nabla^2\rho$                     | ECP     | ZORA    | DKH     | $\nabla^2\rho$                     | ECP     | ZORA    | DKH     |
| AmR <sub>1</sub>                   | 0.1550  | 0.2679  | 0.2733  | EuR <sub>1</sub>                   | 0.1235  | 0.1508  | 0.1514  |
| AmR <sub>2</sub> (R <sub>3</sub> ) | 0.1567  | 0.2021  | 0.2205  | EuR <sub>2</sub> (R <sub>3</sub> ) | 0.1416  | 0.1393  | 0.1385  |
| AmR <sub>4</sub>                   | 0.1480  | 0.2192  | 0.2275  | EuR <sub>4</sub>                   | 0.1451  | 0.1484  | 0.1488  |
| AmR <sub>5</sub>                   | 0.1396  | 0.2304  | 0.2373  | EuR <sub>5</sub>                   | 0.1368  | 0.1359  | 0.1357  |
| AmR <sub>6</sub>                   | 0.1534  | 0.2219  | 0.2305  | EuR <sub>6</sub>                   | 0.1399  | 0.1775  | 0.1770  |
| AmR <sub>7</sub> (R <sub>8</sub> ) | 0.1510  | 0.2242  | 0.2315  | EuR <sub>7</sub> (R <sub>8</sub> ) | 0.1429  | 0.1484  | 0.1488  |
| $H(r)$                             | ECP     | ZORA    | DKH     | $H(r)$                             | ECP     | ZORA    | DKH     |
| AmR <sub>1</sub>                   | -0.0069 | -0.0134 | -0.0175 | EuR <sub>1</sub>                   | 0.0002  | 0.0016  | 0.0016  |
| AmR <sub>2</sub> (R <sub>3</sub> ) | -0.0091 | -0.0038 | -0.0069 | EuR <sub>2</sub> (R <sub>3</sub> ) | -0.0016 | 0.0015  | 0.0016  |
| AmR <sub>4</sub>                   | -0.0064 | -0.0264 | -0.0272 | EuR <sub>4</sub>                   | -0.0044 | 0.0010  | 0.0011  |
| AmR <sub>5</sub>                   | -0.0040 | -0.0217 | -0.0219 | EuR <sub>5</sub>                   | -0.0054 | 0.0019  | 0.0019  |
| AmR <sub>6</sub>                   | -0.0074 | -0.0275 | -0.0286 | EuR <sub>6</sub>                   | -0.0085 | -0.0001 | -0.0001 |
| AmR <sub>7</sub> (R <sub>8</sub> ) | -0.0066 | -0.0244 | -0.0248 | EuR <sub>7</sub> (R <sub>8</sub> ) | -0.0084 | 0.0012  | 0.0012  |

**Table S12** Under the PBE0/ZORA theoretical level, considering the interactions of spin-orbit coupling (SOC) and non-spin-orbit coupling (NOSOC), the values of the N-Am bond length in the AmR<sub>4</sub>PhR<sub>4</sub>(NO<sub>3</sub>)<sub>3</sub> compound, along with  $\rho$ ,  $\nabla^2\rho$ ,  $H(r)$ , and Mayer bond order. <sup>a</sup>

| Bond length       | R <sub>N1</sub> -Am | Ph <sub>N1</sub> -Am | Ph <sub>N2</sub> -Am | R <sub>N2</sub> -Am | N <sub>aver</sub> -Am |
|-------------------|---------------------|----------------------|----------------------|---------------------|-----------------------|
| PBE0/ZORA(SOC)    | 2.6271              | 2.6717               | 2.6729               | 2.6380              | 2.6524                |
| PBE0/ZORA(NOSOC)  | 2.6262              | 2.6733               | 2.6745               | 2.6379              | 2.6530                |
| $\rho$            | R <sub>N1</sub> -Am | Ph <sub>N1</sub> -Am | Ph <sub>N2</sub> -Am | R <sub>N2</sub> -Am | N <sub>aver</sub> -Am |
| PBE0/ZORA(SOC)    | 0.0409              | 0.0374               | 0.0375               | 0.0399              | 0.0389                |
| PBE0/ZORA(NOSOC)  | 0.0408              | 0.0375               | 0.0376               | 0.0399              | 0.0389                |
| $\nabla^2\rho$    | R <sub>N1</sub> -Am | Ph <sub>N1</sub> -Am | Ph <sub>N2</sub> -Am | R <sub>N2</sub> -Am | N <sub>aver</sub> -Am |
| PBE0/ZORA(SOC)    | 0.1410              | 0.1249               | 0.1250               | 0.1374              | 0.1321                |
| PBE0/ZORA(NOSOC)  | 0.1408              | 0.1254               | 0.1254               | 0.1374              | 0.1323                |
| $H(r)*10^2$       | R <sub>N1</sub> -Am | Ph <sub>N1</sub> -Am | Ph <sub>N2</sub> -Am | R <sub>N2</sub> -Am | N <sub>aver</sub> -Am |
| PBE0/ZORA(SOC)    | -0.1640             | -0.1418              | -0.1483              | -0.1463             | -0.1501               |
| PBE0/ZORA(NOSOC)  | -0.1622             | -0.1440              | -0.1501              | -0.1460             | -0.1506               |
| Mayer bond orders | R <sub>N1</sub> -Am | Ph <sub>N1</sub> -Am | Ph <sub>N2</sub> -Am | R <sub>N2</sub> -Am | N <sub>aver</sub> -Am |
| PBE0/ZORA(SOC)    | 0.2003              | 0.1952               | 0.1935               | 0.2013              | 0.1976                |
| PBE0/ZORA(NOSOC)  | 0.2001              | 0.1952               | 0.1934               | 0.2012              | 0.1975                |

<sup>a</sup>:ZORA employs the ZORA-def2-TZVP basis set for C, H, O, and N elements, with the Am and Eu atoms utilizing the SARC-ZORA-TZVP basis set.

**Table S13** The single-point energies and free energies of the AmR<sub>4</sub>PhR<sub>4</sub>(NO<sub>3</sub>)<sub>3</sub> compound under spin-orbit coupling (SOC) and non-spin-orbit coupling (NOSOC) interactions at the PBE0/ZORA theoretical level, along with the differences in single-point energies and free energies between SOC and NOSOC.

| AmR <sub>4</sub> PhR <sub>4</sub> (NO <sub>3</sub> ) <sub>3</sub> | E(a.u.)         | $\Delta E$ (kcal/mol) | G(a.u.)         | $\Delta G$ (kcal/mol) |
|-------------------------------------------------------------------|-----------------|-----------------------|-----------------|-----------------------|
| PBE0/ZORA(SOC)                                                    | -33979.25585481 | 0.0069                | -33979.01355248 | 0.0055                |
| PBE0/ZORA(NOSOC)                                                  | -33979.25584385 |                       | -33979.01356119 |                       |

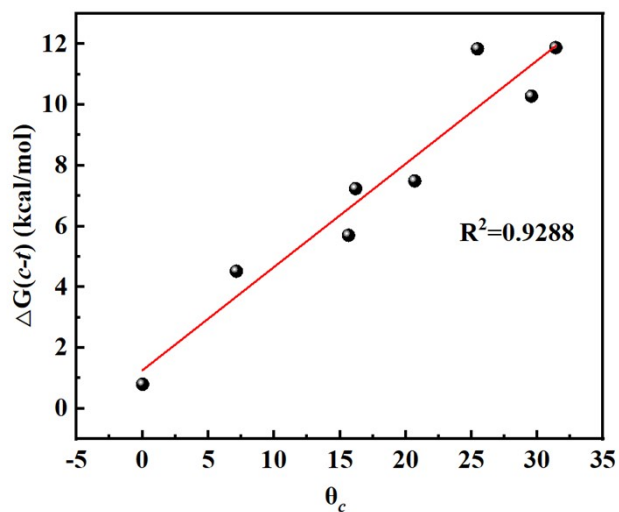

Fig.S7 The angle  $\theta_c$  versus the free energy  $\Delta G(c-t)$  required to convert from the trans- to cis- conformations

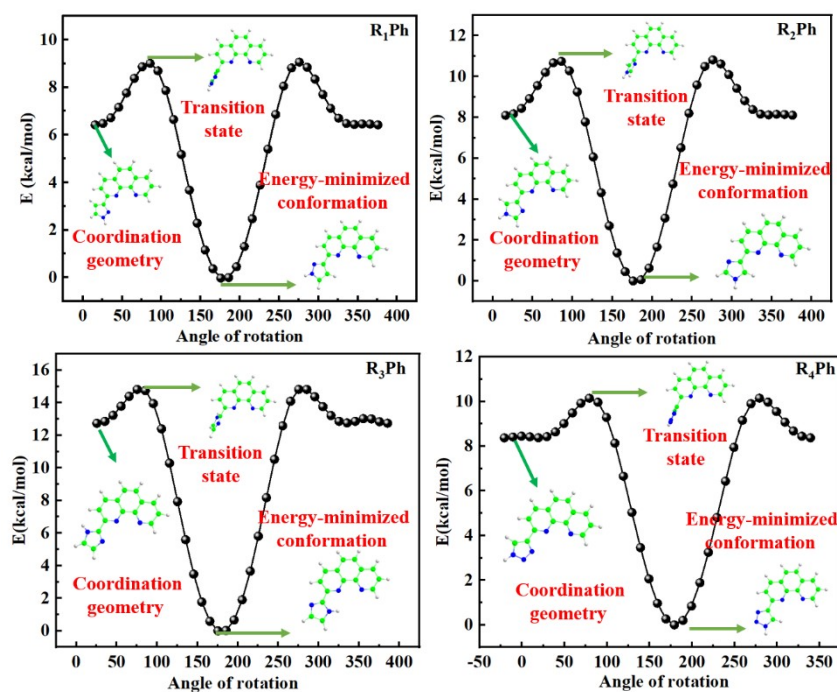

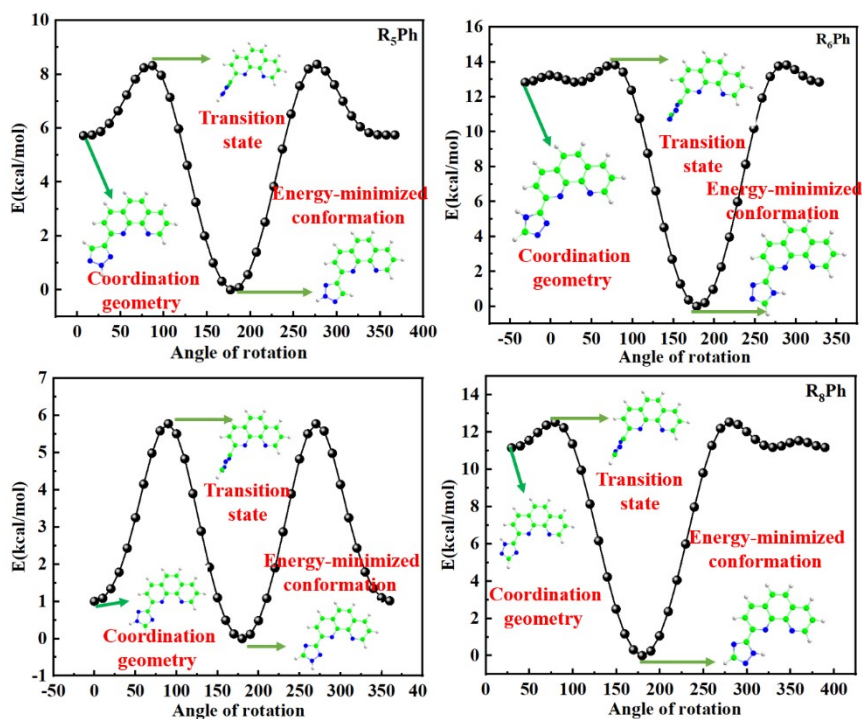

Fig. S8 The potential energy curve of the  $R_lPh$  rotating around the C-C single bond

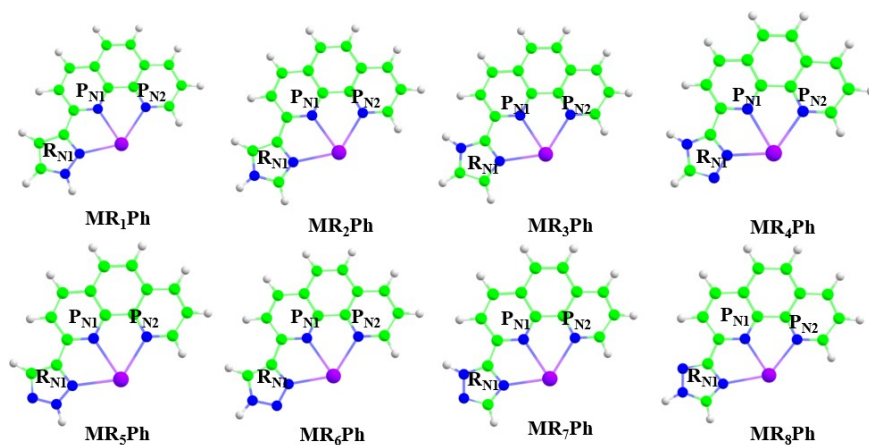

Fig. S9 Geometric configuration of  $M(R_lPh)^{3+}$  ( $l = 1-8$ )

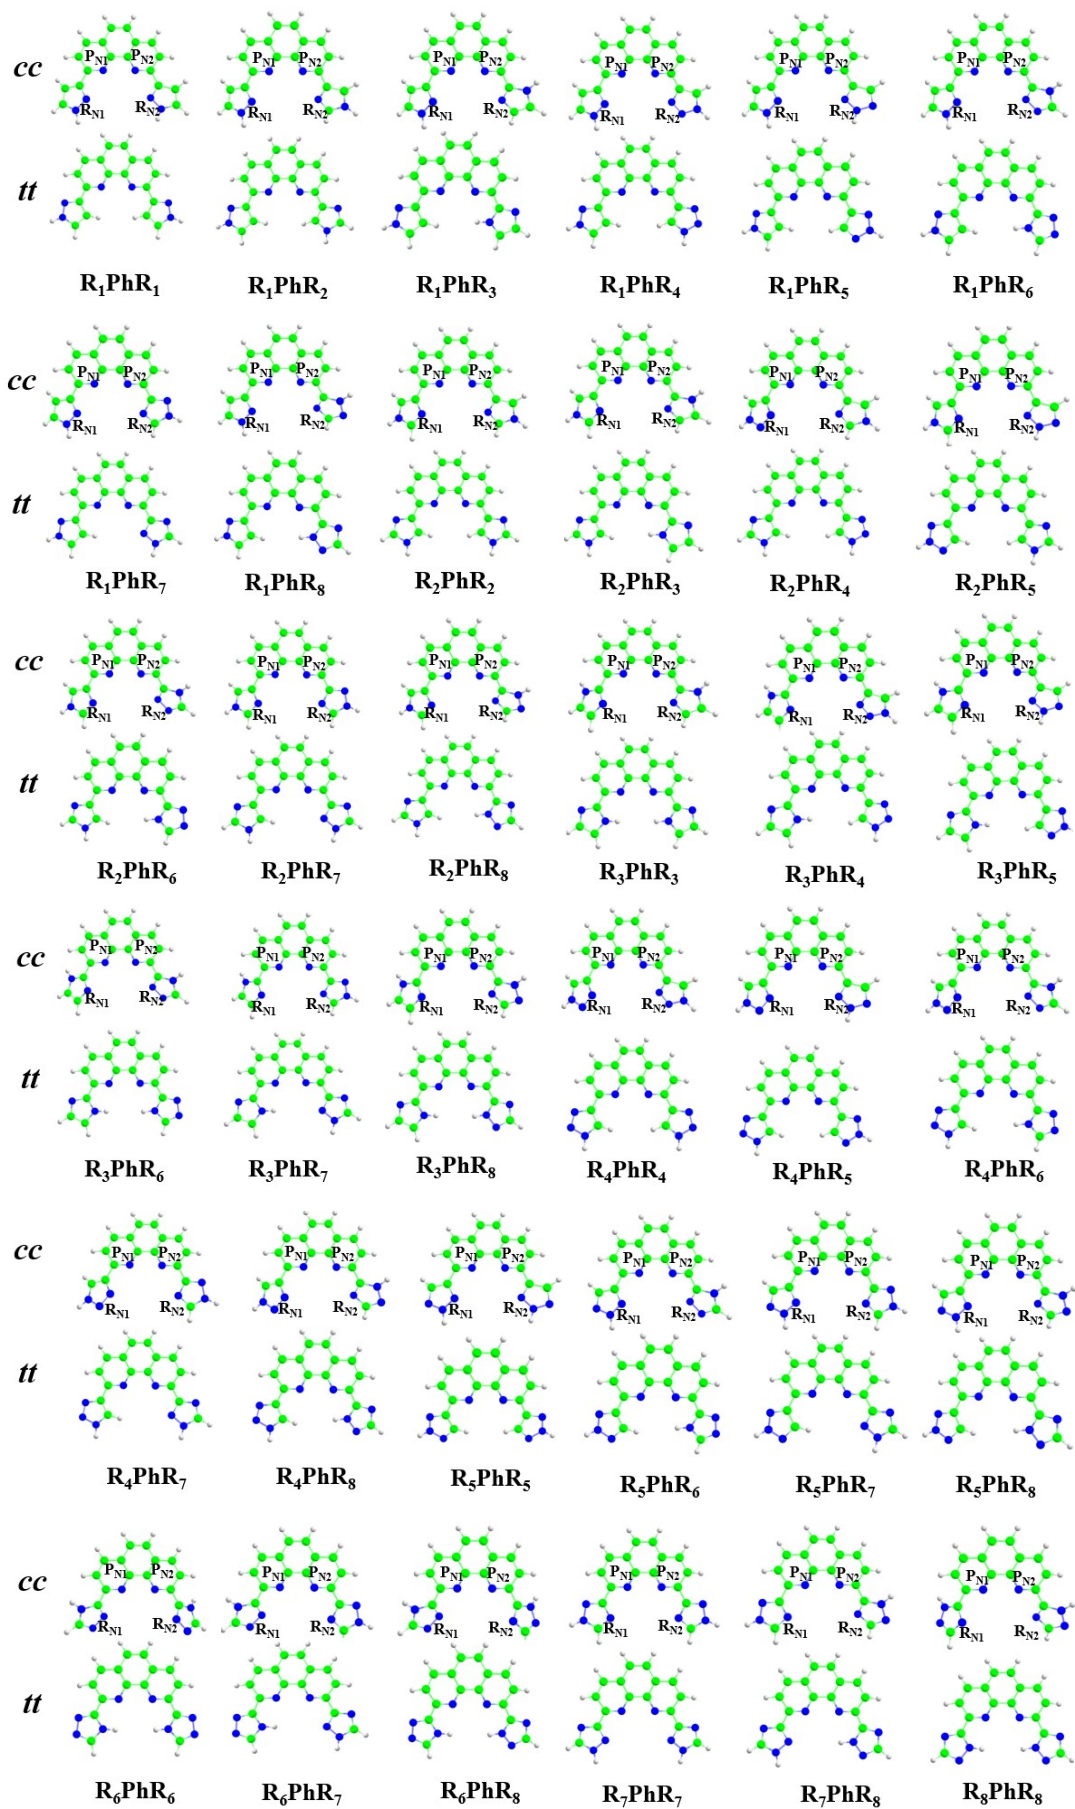



Fig. S10 The molecular structures of the ligands  $R_l\text{PhR}_r$  ( $l, r = 1\sim 8$ )

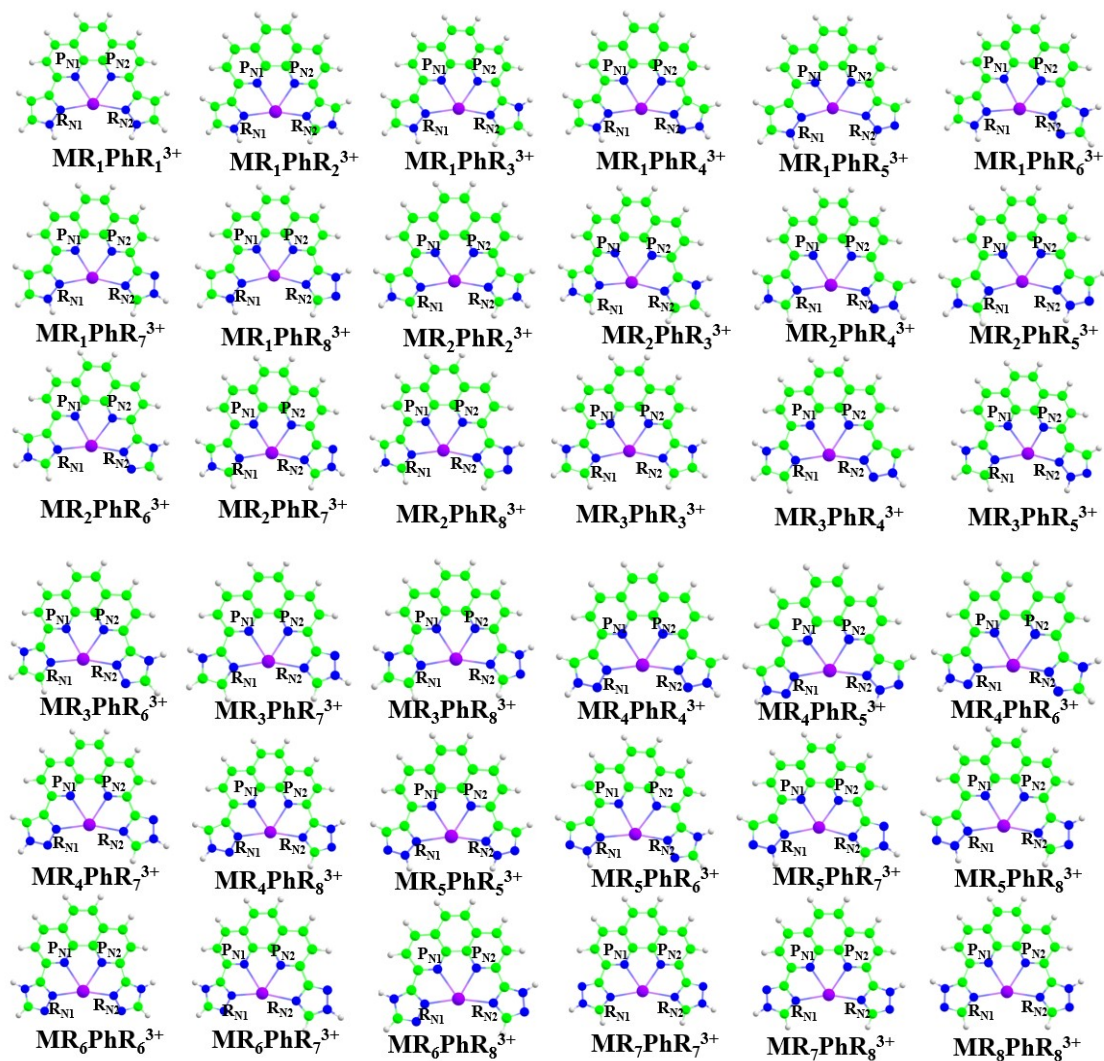

Fig. S11 optimized geometric structures of the complexes  $\text{M}(\text{R}_l\text{PhR}_r)^{3+}$  ( $\text{M} = \text{Am}, \text{Eu}$ )

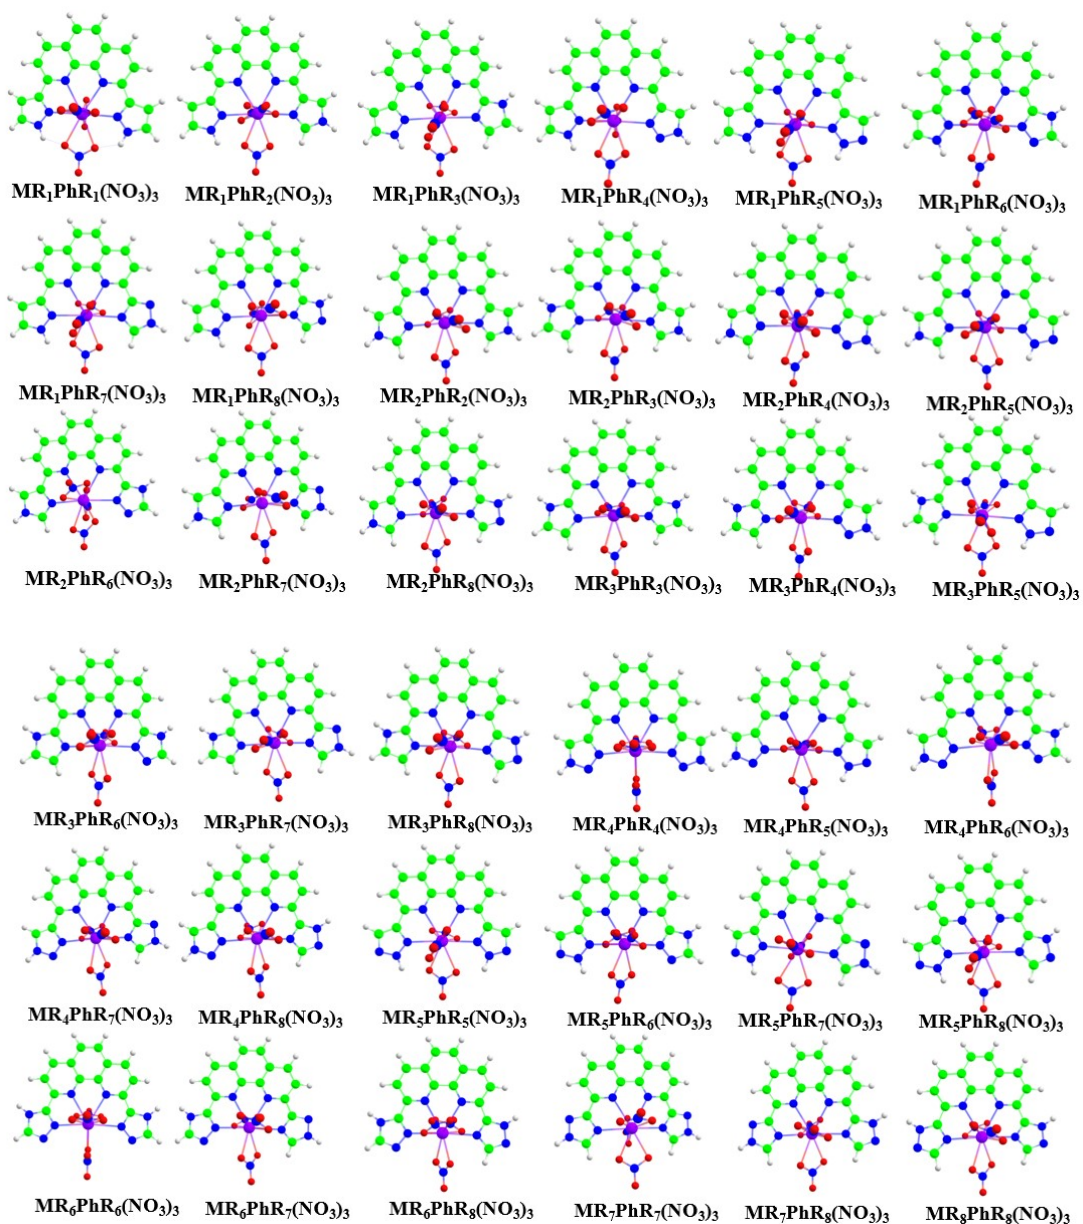

Fig. S12 Geometric structures of  $M(R_lPhR_r)(NO_3)_3$  at the PBE0/6-311G(d)-RECP level

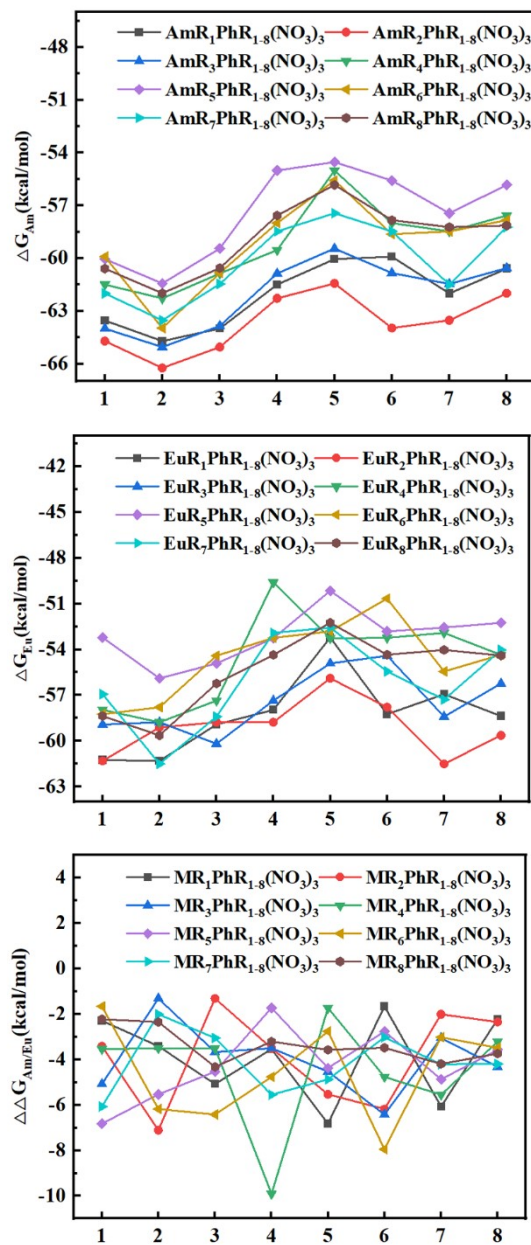

**Fig. S13** Gibbs free energy (a)  $\Delta G_{\text{Am}}$ , (b)  $\Delta G_{\text{Eu}}$ , and (c)  $\Delta\Delta G_{\text{Am/Eu}}$  (kcal/mol) of the solvent extraction process between the aqueous phase and n-octanol phase for  $\text{M}(\text{R}_l\text{PhR}_r)(\text{NO}_3)_3$  ( $l, r = 1-8$ ) calculated by the PBE0/6-311G(d)-RECP method.

**Table S14** ESP values of  $R_l\text{Ph}$  and the sum of ESPs of  $R_l$  and Ph and their scaling relationship.  $\text{ESP}(\text{PhR}) \sim [\text{ESP}(\text{Ph}) + \text{ESP}(\text{R})]$  calculated by PBE0/6-311G(d) method

|                | ESP    |                 | ESP     |                       | ESP(Ph+R)/ESP(R) |
|----------------|--------|-----------------|---------|-----------------------|------------------|
| $R_1\text{Ph}$ | -70.67 | $R_1+\text{Ph}$ | -96.59  | $(R_1+\text{Ph})/R_1$ | 1.37             |
| $R_2\text{Ph}$ | -74.66 | $R_2+\text{Ph}$ | -104.57 | $(R_2+\text{Ph})/R_2$ | 1.40             |
| $R_3\text{Ph}$ | -70.03 | $R_3+\text{Ph}$ | -104.57 | $(R_3+\text{Ph})/R_3$ | 1.49             |
| $R_4\text{Ph}$ | -70.11 | $R_4+\text{Ph}$ | -102.68 | $(R_4+\text{Ph})/R_4$ | 1.46             |
| $R_5\text{Ph}$ | -65.62 | $R_5+\text{Ph}$ | -88.39  | $(R_5+\text{Ph})/R_5$ | 1.35             |
| $R_6\text{Ph}$ | -66.39 | $R_6+\text{Ph}$ | -106.64 | $(R_6+\text{Ph})/R_6$ | 1.61             |
| $R_7\text{Ph}$ | -70.81 | $R_7+\text{Ph}$ | -97.48  | $(R_7+\text{Ph})/R_7$ | 1.38             |
| $R_8\text{Ph}$ | -64.01 | $R_8+\text{Ph}$ | -97.48  | $(R_8+\text{Ph})/R_8$ | 1.52             |

**Table S15** The averaged bond lengths ( $r$ ), Mayer bond orders ( $m$ ), and WBI bond orders ( $w$ ) of the M-N bonds and the bonding energies  $\Delta E_M$  (kcal/mol) in  $M(R_l\text{Ph})^{3+}$  ( $l=1-8$ ) calculated by PBE0/6-311G(d)-RECP method

|                        | $r(\text{N-Am})$ | $r(\text{N-Eu})$ | $w(\text{N-Am})$ | $w(\text{N-Eu})$ | $m(\text{N-Am})$ | $m(\text{N-Eu})$ | $\Delta E_{\text{Am}}$ | $\Delta E_{\text{Eu}}$ |
|------------------------|------------------|------------------|------------------|------------------|------------------|------------------|------------------------|------------------------|
| $\text{MR}_1\text{Ph}$ | 2.489            | 2.576            | 0.1231           | 0.0619           | 0.3622           | 0.2641           | -409.2                 | -449.2                 |
| $\text{MR}_2\text{Ph}$ | 2.510            | 2.574            | 0.1100           | 0.0614           | 0.3387           | 0.2655           | <b>-423.7</b>          | <b>-464.5</b>          |
| $\text{MR}_3\text{Ph}$ | 2.516            | 2.579            | 0.1077           | 0.0601           | 0.3322           | 0.2603           | -419.5                 | -460.2                 |
| $\text{MR}_4\text{Ph}$ | 2.486            | 2.591            | 0.1224           | 0.0573           | 0.3516           | 0.2434           | -411.7                 | -451.2                 |
| $\text{MR}_5\text{Ph}$ | 2.531            | 2.593            | 0.1038           | 0.0588           | 0.3175           | 0.2516           | <b>-389.6</b>          | <b>-430.8</b>          |
| $\text{MR}_6\text{Ph}$ | 2.442            | 2.596            | 0.1503           | 0.0567           | 0.4028           | 0.2393           | -414.3                 | -450.4                 |
| $\text{MR}_7\text{Ph}$ | 2.510            | 2.593            | 0.1135           | 0.0594           | 0.3469           | 0.2577           | -405.5                 | -446.1                 |
| $\text{MR}_8\text{Ph}$ | 2.480            | 2.594            | 0.1281           | 0.0582           | 0.3760           | 0.2526           | <b>-398.3</b>          | <b>-437.2</b>          |

**Table S16** The averaged bond lengths ( $r$ ), Mayer bond orders ( $m$ ), and WBI bond orders ( $w$ ) of the M-N bonds and the bond length ( $r'$ ) after subtracting the ionic radius (the ionic radius of  $\text{Am}^{3+}$  is 0.975 Å, and the ionic radius of  $\text{Eu}^{3+}$  is 0.947 Å) in  $\text{MRPh}(\text{NO}_3)_3$  ( $l=1-8$ ) calculated by PBE0/6-311G(d)-RECP method

|                                       | $r(\text{N-Am})$ | $r(\text{N-Eu})$ | $w(\text{N-Am})$ | $w(\text{N-Eu})$ | $m(\text{N-Am})$ | $m(\text{N-Eu})$ | $r'(\text{N-Am})$ | $r'(\text{N-Eu})$ |
|---------------------------------------|------------------|------------------|------------------|------------------|------------------|------------------|-------------------|-------------------|
| $\text{MR}_1\text{Ph}(\text{NO}_3)_3$ | 2.598            | 2.580            | 0.0897           | 0.0760           | 0.1608           | 0.1594           | 1.623             | 1.633             |
| $\text{MR}_2\text{Ph}(\text{NO}_3)_3$ | 2.600            | 2.582            | 0.0879           | 0.0741           | 0.1628           | 0.1643           | 1.625             | 1.635             |
| $\text{MR}_3\text{Ph}(\text{NO}_3)_3$ | 2.611            | 2.594            | 0.0855           | 0.0713           | 0.1583           | 0.1591           | 1.636             | 1.647             |
| $\text{MR}_4\text{Ph}(\text{NO}_3)_3$ | 2.627            | 2.609            | 0.0810           | 0.0647           | 0.1414           | 0.1380           | 1.652             | 1.662             |
| $\text{MR}_5\text{Ph}(\text{NO}_3)_3$ | 2.610            | 2.592            | 0.0864           | 0.0731           | 0.1516           | 0.1577           | 1.635             | 1.645             |
| $\text{MR}_6\text{Ph}(\text{NO}_3)_3$ | 2.633            | 2.607            | 0.0792           | 0.0619           | 0.1396           | 0.1376           | 1.658             | 1.660             |
| $\text{MR}_7\text{Ph}(\text{NO}_3)_3$ | 2.610            | 2.592            | 0.0886           | 0.0719           | 0.1566           | 0.1544           | 1.635             | 1.645             |

MR<sub>8</sub>Ph(NO<sub>3</sub>)<sub>3</sub> 2.620 2.603 0.0831 0.0667 0.1522 0.1476 1.645 1.656

**Table S17** The free energy and bond dissociation energy ( $M^{3+}+L+3NO_3^-=ML(NO_3)_3$ ) in the gas phase (a) and in n-octanol phase (b) calculated by PBE0/6-311G(d) -RECP method

|                                                   | $\Delta G_{Am}^a$ | $\Delta G_{Eu}^a$ | $\Delta E_{Am}^a$ | $\Delta E_{Eu}^a$ | $\Delta G_{Am}^b$ | $\Delta G_{Eu}^b$ | $\Delta E_{Am}^b$ | $\Delta E_{Eu}^b$ |
|---------------------------------------------------|-------------------|-------------------|-------------------|-------------------|-------------------|-------------------|-------------------|-------------------|
| MR <sub>1</sub> Ph(NO <sub>3</sub> ) <sub>3</sub> | -1034.0           | -1046.3           | -1081.6           | -1094.5           | -263.4            | -272.3            | -332.6            | -342.1            |
| MR <sub>2</sub> Ph(NO <sub>3</sub> ) <sub>3</sub> | -1034.6           | -1046.8           | -1082.0           | -1095.0           | -266.3            | -278.2            | -335.3            | -347.9            |
| MR <sub>3</sub> Ph(NO <sub>3</sub> ) <sub>3</sub> | -1031.7           | -1043.9           | -1078.7           | -1091.6           | -265.0            | -276.9            | -333.6            | -346.2            |
| MR <sub>4</sub> Ph(NO <sub>3</sub> ) <sub>3</sub> | -1026.7           | -1038.9           | -1074.0           | -1086.8           | -261.1            | -273.0            | -329.9            | -342.5            |
| MR <sub>5</sub> Ph(NO <sub>3</sub> ) <sub>3</sub> | -1028.0           | -1040.4           | -1076.0           | -1089.0           | -258.2            | -266.9            | -327.7            | -337.0            |
| MR <sub>6</sub> Ph(NO <sub>3</sub> ) <sub>3</sub> | -1026.2           | -1034.2           | -1073.0           | -1081.8           | -261.2            | -271.2            | -329.6            | -340.4            |
| MR <sub>7</sub> Ph(NO <sub>3</sub> ) <sub>3</sub> | -1031.2           | -1043.5           | -1078.3           | -1091.3           | -264.7            | -271.1            | -333.3            | -340.4            |
| MR <sub>8</sub> Ph(NO <sub>3</sub> ) <sub>3</sub> | -1027.7           | -1039.9           | -1074.5           | -1087.5           | -261.4            | -273.3            | -329.8            | -342.4            |

**Table S18** The Gibbs free energy  $\Delta G_M$  of the extraction process  $M(H_2O)_9^{3+}+L+3NO_3^-=ML(NO_3)_3+9H_2O$  in gas phase and the difference  $\Delta\Delta G_{Am/Eu}$  calculated by PBE0/6-311G(d) -RECP method

|                                                  | $\Delta G_{Am}(\text{gas})$ | $\Delta G_{Eu}(\text{gas})$ | $\Delta\Delta G_{Am/Eu}$ |
|--------------------------------------------------|-----------------------------|-----------------------------|--------------------------|
| MR <sub>1</sub> P(NO <sub>3</sub> ) <sub>3</sub> | -533.5                      | -535.1                      | 1.6                      |
| MR <sub>2</sub> P(NO <sub>3</sub> ) <sub>3</sub> | -534.1                      | -535.7                      | 1.5                      |
| MR <sub>3</sub> P(NO <sub>3</sub> ) <sub>3</sub> | -531.3                      | -532.7                      | 1.4                      |
| MR <sub>4</sub> P(NO <sub>3</sub> ) <sub>3</sub> | -526.3                      | -527.8                      | 1.5                      |
| MR <sub>5</sub> P(NO <sub>3</sub> ) <sub>3</sub> | -527.6                      | -529.3                      | 1.7                      |
| MR <sub>6</sub> P(NO <sub>3</sub> ) <sub>3</sub> | -525.8                      | -523.0                      | -2.8                     |
| MR <sub>7</sub> P(NO <sub>3</sub> ) <sub>3</sub> | -530.8                      | -532.3                      | 1.6                      |
| MR <sub>8</sub> P(NO <sub>3</sub> ) <sub>3</sub> | -527.3                      | -528.8                      | 1.5                      |

**Table S19** The twist angles  $\angle R_i\text{Ph}$  and  $\angle R_r\text{Ph}$  between the  $R_i$  or  $R_r$  plane and the Ph plane in the *cc*- and *tt*- configurations for the  $R_i\text{PhR}_r$  ligand.

|                                 | $R_1\text{PhR}_1$ | $R_1\text{PhR}_2$ | $R_1\text{PhR}_3$ | $R_1\text{PhR}_4$ | $R_1\text{PhR}_5$ | $R_1\text{PhR}_6$ |
|---------------------------------|-------------------|-------------------|-------------------|-------------------|-------------------|-------------------|
| $\angle R_i\text{P}(\text{cc})$ | 19.80             | 20.21             | 19.08             | 18.86             | 18.71             | 17.93             |
| $\angle R_r\text{P}(\text{cc})$ | 19.78             | 20.38             | 28.08             | 24.31             | 15.75             | 34.25             |
| $\angle R_i\text{P}(\text{tt})$ | 0.02              | 0.02              | 0.06              | 0.04              | 0.06              | 0.08              |
| $\angle R_r\text{P}(\text{tt})$ | 0.02              | 0.00              | 0.00              | 0.01              | 0.00              | 0.03              |
|                                 | $R_1\text{PhR}_7$ | $R_1\text{PhR}_8$ | $R_2\text{PhR}_2$ | $R_2\text{PhR}_3$ | $R_2\text{PhR}_4$ | $R_2\text{PhR}_5$ |
| $\angle R_i\text{P}(\text{cc})$ | 19.08             | 18.01             | 21.74             | 21.02             | 21.36             | 18.99             |
| $\angle R_r\text{P}(\text{cc})$ | 0.86              | 32.30             | 21.77             | 29.20             | 27.02             | 16.22             |
| $\angle R_i\text{P}(\text{tt})$ | 0.01              | 0.04              | 0.02              | 0.02              | 0.03              | 0.00              |
| $\angle R_r\text{P}(\text{tt})$ | 0.00              | 0.01              | 0.02              | 0.01              | 0.04              | 0.00              |
|                                 | $R_2\text{PhR}_6$ | $R_2\text{PhR}_7$ | $R_2\text{PhR}_8$ | $R_3\text{PhR}_3$ | $R_3\text{PhR}_4$ | $R_3\text{PhR}_5$ |

|                   |            |            |            |            |            |            |
|-------------------|------------|------------|------------|------------|------------|------------|
| $\angle R_rP(cc)$ | 20.94      | 19.89      | 19.65      | 28.55      | 28.70      | 27.03      |
| $\angle R_rP(cc)$ | 36.66      | 1.54       | 33.48      | 28.55      | 27.31      | 14.74      |
| $\angle R_rP(tt)$ | 0.03       | 0.01       | 0.06       | 0.00       | 0.00       | 0.03       |
| $\angle R_rP(tt)$ | 0.01       | 0.07       | 0.02       | 0.01       | 0.02       | 0.01       |
|                   | $R_3PhR_6$ | $R_3PhR_7$ | $R_3PhR_8$ | $R_4PhR_4$ | $R_4PhR_5$ | $R_4PhR_6$ |
| $\angle R_rP(cc)$ | 28.34      | 28.13      | 27.34      | 28.19      | 22.87      | 28.67      |
| $\angle R_rP(cc)$ | 37.06      | 1.86       | 33.09      | 28.21      | 14.30      | 37.64      |
| $\angle R_rP(tt)$ | 0.01       | 0.02       | 0.02       | 0.01       | 0.00       | 0.00       |
| $\angle R_rP(tt)$ | 0.00       | 0.00       | 0.01       | 0.01       | 0.00       | 0.00       |
|                   | $R_4PhR_7$ | $R_4PhR_8$ | $R_5PhR_5$ | $R_5PhR_6$ | $R_5PhR_7$ | $R_5PhR_8$ |
| $\angle R_rP(cc)$ | 24.92      | 25.53      | 13.71      | 12.84      | 14.53      | 13.08      |
| $\angle R_rP(cc)$ | 2.17       | 33.20      | 10.32      | 33.06      | 0.56       | 31.30      |
| $\angle R_rP(tt)$ | 0.00       | 0.00       | 0.00       | 0.01       | 0.00       | 0.00       |
| $\angle R_rP(tt)$ | 0.00       | 0.00       | 0.01       | 0.01       | 0.00       | 0.01       |
|                   | $R_6PhR_6$ | $R_6PhR_7$ | $R_6PhR_8$ | $R_7PhR_7$ | $R_7PhR_8$ | $R_8PhR_8$ |
| $\angle R_rP(cc)$ | 38.17      | 35.28      | 35.65      | 0.00       | 1.77       | 31.97      |
| $\angle R_rP(cc)$ | 38.15      | 2.54       | 33.02      | 0.01       | 32.48      | 31.96      |
| $\angle R_rP(tt)$ | 0.00       | 0.02       | 0.00       | 0.01       | 0.00       | 0.00       |
| $\angle R_rP(tt)$ | 0.00       | 0.04       | 0.00       | 0.01       | 0.00       | 0.00       |

**Table S20** The HOMO-LUMO orbital energy levels,  $Ph_{N1}$ ,  $Ph_{N2}$ ,  $R_{N1}$ , and  $R_{N2}$ , protonation energies ( $\Delta G_{RN1}$ ,  $\Delta G_{PN1}$ ,  $\Delta G_{PN2}$ ) in  $R_lPhR_r$  ( $l, r = 1-8$ )

| Ligands    | HOMO    | LUMO    | gap    | $\Delta G_{PN1}$ | $\Delta G_{PN2}$ | $\Delta G_{RN1}$ | $\Delta G_{RN2}$ |
|------------|---------|---------|--------|------------------|------------------|------------------|------------------|
| $R_1PhR_1$ | -5.9579 | -1.3875 | 4.5704 | -89.3            | -89.3            | -70.1            | -70.1            |
| $R_1PhR_2$ | -5.8064 | -1.3053 | 4.5011 | -91.6            | -93.1            | -72.6            | -79.7            |
| $R_1PhR_3$ | -5.9092 | -1.5556 | 4.3536 | -88.6            | -88.0            | -71.0            | -81.9            |
| $R_1PhR_4$ | -6.0808 | -1.5004 | 4.5805 | -88.3            | -86.3            | -71.2            | -71.0            |
| $R_1PhR_5$ | -6.1524 | -1.5909 | 4.5614 | -85.3            | -82.6            | -66.9            | -56.2            |
| $R_1PhR_6$ | -6.2457 | -1.7310 | 4.5147 | -85.7            | -82.0            | -70.0            | -77.8            |
| $R_1PhR_7$ | -6.0457 | -1.4688 | 4.5769 | -86.6            | -88.2            | -69.2            | -69.8            |
| $R_1PhR_8$ | -6.3080 | -1.7952 | 4.5128 | -84.4            | -80.3            | -67.6            | -71.5            |
| $R_2PhR_2$ | -5.6916 | -1.2213 | 4.4703 | -95.3            | -95.3            | -82.1            | -82.1            |
| $R_2PhR_3$ | -5.8058 | -1.4786 | 4.3272 | -92.5            | -90.2            | -80.7            | -84.3            |
| $R_2PhR_4$ | -5.9070 | -1.4209 | 4.4861 | -92.1            | -88.5            | -80.9            | -73.3            |
| $R_2PhR_5$ | -5.9704 | -1.5112 | 4.4592 | -89.2            | -85.0            | -76.6            | -58.8            |
| $R_2PhR_6$ | -6.0525 | -1.6548 | 4.3977 | -89.7            | -84.2            | -79.8            | -80.1            |
| $R_2PhR_7$ | -5.8665 | -1.3867 | 4.4798 | -92.0            | -88.8            | -79.5            | -71.7            |
| $R_2PhR_8$ | -6.1015 | -1.7182 | 4.3833 | -87.9            | -82.6            | -77.5            | -74.0            |
| $R_3PhR_3$ | -5.9065 | -1.7117 | 4.1948 | -87.4            | -87.4            | -82.8            | -82.8            |
| $R_3PhR_4$ | -5.9818 | -1.6641 | 4.3177 | -87.0            | -85.5            | -82.8            | -71.7            |
| $R_3PhR_5$ | -6.0531 | -1.7479 | 4.3052 | -84.0            | -81.9            | -78.8            | -57.1            |

|                                 |         |         |        |       |       |       |       |
|---------------------------------|---------|---------|--------|-------|-------|-------|-------|
| R <sub>3</sub> PhR <sub>6</sub> | -6.1048 | -1.8798 | 4.2250 | -84.6 | -81.3 | -81.5 | -78.5 |
| R <sub>3</sub> PhR <sub>7</sub> | -5.9568 | -1.6306 | 4.3262 | -87.0 | -85.9 | -81.7 | -70.3 |
| R <sub>3</sub> PhR <sub>8</sub> | -6.1543 | -1.9415 | 4.2127 | -83.2 | -79.7 | -79.6 | -72.4 |
| R <sub>4</sub> PhR <sub>4</sub> | -6.2620 | -1.6143 | 4.6477 | -85.0 | -85.0 | -71.7 | -71.7 |
| R <sub>4</sub> PhR <sub>5</sub> | -6.2990 | -1.6989 | 4.6001 | -82.3 | -81.6 | -67.8 | -57.3 |
| R <sub>4</sub> PhR <sub>6</sub> | -6.4393 | -1.8379 | 4.6014 | -82.6 | -80.7 | -70.4 | -78.3 |
| R <sub>4</sub> PhR <sub>7</sub> | -6.2049 | -1.5784 | 4.6264 | -85.2 | -85.5 | -70.7 | -70.5 |
| R <sub>4</sub> PhR <sub>8</sub> | -6.4869 | -1.9005 | 4.5865 | -81.6 | -79.2 | -68.5 | -72.5 |
| R <sub>5</sub> PhR <sub>5</sub> | -6.3640 | -1.7884 | 4.5756 | -76.8 | -76.8 | -51.2 | -51.2 |
| R <sub>5</sub> PhR <sub>6</sub> | -6.4731 | -1.9198 | 4.5533 | -78.8 | -77.9 | -56.0 | -74.5 |
| R <sub>5</sub> PhR <sub>7</sub> | -6.2672 | -1.6660 | 4.6012 | -81.5 | -82.4 | -55.9 | -66.0 |
| R <sub>5</sub> PhR <sub>8</sub> | -6.5430 | -1.9829 | 4.5601 | -77.2 | -76.1 | -53.4 | -68.2 |
| R <sub>6</sub> PhR <sub>6</sub> | -6.6072 | -2.0468 | 4.5604 | -78.5 | -78.5 | -76.9 | -76.9 |
| R <sub>6</sub> PhR <sub>7</sub> | -6.3876 | -1.8034 | 4.5843 | -80.9 | -82.9 | -77.4 | -69.4 |
| R <sub>6</sub> PhR <sub>8</sub> | -6.6572 | -2.1088 | 4.5484 | -77.3 | -76.7 | -75.2 | -71.2 |
| R <sub>7</sub> PhR <sub>7</sub> | -6.1638 | -1.5412 | 4.6226 | -85.5 | -85.5 | -69.0 | -69.0 |
| R <sub>7</sub> PhR <sub>8</sub> | -6.4513 | -1.8648 | 4.5865 | -81.8 | -79.2 | -66.9 | -71.3 |
| R <sub>8</sub> PhR <sub>8</sub> | -6.7230 | -2.1703 | 4.5527 | -75.4 | -75.4 | -69.0 | -69.0 |

**Table S21** N-M Bond lengths (Å) in the complexes  $\mathbf{M}(\mathbf{R}_l\mathbf{PhR}_r)^{3+}$  ( $l, r=1-8$ ) calculated by the PBE0/6-311G(d)-RECP method in the gas phase

|                                  | R <sub>N1</sub> -Am | Ph <sub>N1</sub> -Am | Ph <sub>N2</sub> -Am | R <sub>N2</sub> -Am | N <sub>aver</sub> -Am | R <sub>N1</sub> -Eu | Ph <sub>N1</sub> -Eu | Ph <sub>N2</sub> -Eu | R <sub>N2</sub> -Eu | N <sub>aver</sub> -Eu |
|----------------------------------|---------------------|----------------------|----------------------|---------------------|-----------------------|---------------------|----------------------|----------------------|---------------------|-----------------------|
| MR <sub>1</sub> PhR <sub>1</sub> | 2.448               | 2.413                | 2.413                | 2.448               | 2.431                 | 2.621               | 2.580                | 2.580                | 2.621               | 2.600                 |
| MR <sub>1</sub> PhR <sub>2</sub> | 2.471               | 2.376                | 2.383                | 2.447               | 2.419                 | 2.606               | 2.566                | 2.599                | 2.635               | 2.601                 |
| MR <sub>1</sub> PhR <sub>3</sub> | 2.451               | 2.425                | 2.441                | 2.405               | 2.431                 | 2.593               | 2.558                | 2.612                | 2.647               | 2.603                 |
| MR <sub>1</sub> PhR <sub>4</sub> | 2.436               | 2.412                | 2.468                | 2.415               | 2.433                 | 2.621               | 2.595                | 2.627                | 2.576               | 2.605                 |
| MR <sub>1</sub> PhR <sub>5</sub> | 2.447               | 2.386                | 2.403                | 2.529               | 2.441                 | 2.617               | 2.584                | 2.593                | 2.658               | 2.613                 |
| MR <sub>1</sub> PhR <sub>6</sub> | 2.442               | 2.430                | 2.503                | 2.353               | 2.432                 | 2.620               | 2.598                | 2.634                | 2.524               | 2.594                 |
| MR <sub>1</sub> PhR <sub>7</sub> | 2.442               | 2.409                | 2.423                | 2.483               | 2.439                 | 2.634               | 2.604                | 2.589                | 2.623               | 2.612                 |
| MR <sub>1</sub> PhR <sub>8</sub> | 2.464               | 2.375                | 2.405                | 2.460               | 2.426                 | 2.630               | 2.600                | 2.607                | 2.589               | 2.606                 |
| MR <sub>2</sub> PhR <sub>2</sub> | 2.442               | 2.419                | 2.419                | 2.442               | 2.431                 | 2.614               | 2.585                | 2.585                | 2.614               | 2.600                 |
| MR <sub>2</sub> PhR <sub>3</sub> | 2.443               | 2.431                | 2.442                | 2.407               | 2.431                 | 2.601               | 2.579                | 2.603                | 2.628               | 2.602                 |
| MR <sub>2</sub> PhR <sub>4</sub> | 2.429               | 2.417                | 2.468                | 2.418               | 2.433                 | 2.637               | 2.612                | 2.613                | 2.567               | 2.607                 |
| MR <sub>2</sub> PhR <sub>5</sub> | 2.443               | 2.388                | 2.397                | 2.530               | 2.439                 | 2.631               | 2.600                | 2.577                | 2.644               | 2.613                 |
| MR <sub>2</sub> PhR <sub>6</sub> | 2.435               | 2.437                | 2.502                | 2.356               | 2.432                 | 2.645               | 2.623                | 2.627                | 2.520               | 2.604                 |
| MR <sub>2</sub> PhR <sub>7</sub> | 2.473               | 2.389                | 2.395                | 2.500               | 2.439                 | 2.646               | 2.619                | 2.575                | 2.613               | 2.613                 |
| MR <sub>2</sub> PhR <sub>8</sub> | 2.432               | 2.427                | 2.455                | 2.428               | 2.435                 | 2.652               | 2.621                | 2.594                | 2.577               | 2.611                 |
| MR <sub>3</sub> PhR <sub>3</sub> | 2.453               | 2.386                | 2.386                | 2.453               | 2.420                 | 2.610               | 2.596                | 2.596                | 2.610               | 2.603                 |
| MR <sub>3</sub> PhR <sub>4</sub> | 2.397               | 2.440                | 2.481                | 2.420               | 2.434                 | 2.650               | 2.624                | 2.605                | 2.555               | 2.608                 |
| MR <sub>3</sub> PhR <sub>5</sub> | 2.415               | 2.432                | 2.431                | 2.521               | 2.450                 | 2.646               | 2.613                | 2.568                | 2.632               | 2.615                 |
| MR <sub>3</sub> PhR <sub>6</sub> | 2.405               | 2.458                | 2.515                | 2.360               | 2.434                 | 2.659               | 2.637                | 2.620                | 2.510               | 2.606                 |
| MR <sub>3</sub> PhR <sub>7</sub> | 2.396               | 2.441                | 2.437                | 2.474               | 2.437                 | 2.660               | 2.632                | 2.568                | 2.602               | 2.616                 |
| MR <sub>3</sub> PhR <sub>8</sub> | 2.400               | 2.449                | 2.466                | 2.431               | 2.436                 | 2.665               | 2.632                | 2.585                | 2.566               | 2.612                 |
| MR <sub>4</sub> PhR <sub>4</sub> | 2.409               | 2.467                | 2.467                | 2.408               | 2.438                 | 2.582               | 2.650                | 2.650                | 2.582               | 2.616                 |

|                                  |       |       |       |       |       |       |       |       |       |       |
|----------------------------------|-------|-------|-------|-------|-------|-------|-------|-------|-------|-------|
| MR <sub>4</sub> PhR <sub>5</sub> | 2.400 | 2.457 | 2.417 | 2.488 | 2.440 | 2.573 | 2.636 | 2.609 | 2.658 | 2.619 |
| MR <sub>4</sub> PhR <sub>6</sub> | 2.416 | 2.487 | 2.503 | 2.349 | 2.439 | 2.577 | 2.650 | 2.652 | 2.527 | 2.601 |
| MR <sub>4</sub> PhR <sub>7</sub> | 2.407 | 2.468 | 2.423 | 2.460 | 2.439 | 2.589 | 2.657 | 2.607 | 2.623 | 2.619 |
| MR <sub>4</sub> PhR <sub>8</sub> | 2.410 | 2.478 | 2.453 | 2.417 | 2.439 | 2.586 | 2.652 | 2.626 | 2.594 | 2.614 |
| MR <sub>5</sub> PhR <sub>5</sub> | 2.530 | 2.409 | 2.411 | 2.513 | 2.466 | 2.653 | 2.597 | 2.597 | 2.653 | 2.625 |
| MR <sub>5</sub> PhR <sub>6</sub> | 2.493 | 2.436 | 2.494 | 2.338 | 2.440 | 2.663 | 2.620 | 2.649 | 2.527 | 2.615 |
| MR <sub>5</sub> PhR <sub>7</sub> | 2.506 | 2.405 | 2.399 | 2.490 | 2.450 | 2.671 | 2.619 | 2.594 | 2.618 | 2.625 |
| MR <sub>5</sub> PhR <sub>8</sub> | 2.492 | 2.428 | 2.444 | 2.410 | 2.443 | 2.667 | 2.616 | 2.616 | 2.589 | 2.622 |
| MR <sub>6</sub> PhR <sub>6</sub> | 2.396 | 2.430 | 2.430 | 2.396 | 2.413 | 2.524 | 2.652 | 2.652 | 2.524 | 2.588 |
| MR <sub>6</sub> PhR <sub>7</sub> | 2.345 | 2.504 | 2.443 | 2.465 | 2.439 | 2.538 | 2.664 | 2.612 | 2.623 | 2.609 |
| MR <sub>6</sub> PhR <sub>8</sub> | 2.350 | 2.513 | 2.471 | 2.424 | 2.440 | 2.528 | 2.651 | 2.622 | 2.587 | 2.597 |
| MR <sub>7</sub> PhR <sub>7</sub> | 2.463 | 2.423 | 2.423 | 2.463 | 2.443 | 2.634 | 2.615 | 2.615 | 2.634 | 2.624 |
| MR <sub>7</sub> PhR <sub>8</sub> | 2.463 | 2.434 | 2.454 | 2.417 | 2.442 | 2.630 | 2.611 | 2.636 | 2.605 | 2.620 |
| MR <sub>8</sub> PhR <sub>8</sub> | 2.420 | 2.463 | 2.463 | 2.420 | 2.441 | 2.599 | 2.627 | 2.627 | 2.599 | 2.613 |

**Table S22** Bond energies  $\Delta E_M$  (kcal/mol) in  $M(\mathbf{R}_l\text{PhR}_r)^{3+}$  ( $l, r = 1-8$ ) calculated by the PBE0/6-311G(d)-RECP method in the gas phase

|                                  | $\Delta E_{Am}$ | $\Delta E_{Eu}$ |                                  | $\Delta E_{Am}$ | $\Delta E_{Eu}$ |                                  | $\Delta E_{Am}$ | $\Delta E_{Eu}$ |
|----------------------------------|-----------------|-----------------|----------------------------------|-----------------|-----------------|----------------------------------|-----------------|-----------------|
| MR <sub>1</sub> PhR <sub>1</sub> | -472.4          | -499.9          | MR <sub>2</sub> PhR <sub>6</sub> | -495.7          | -515.4          | MR <sub>4</sub> PhR <sub>7</sub> | -475.1          | -499.5          |
| MR <sub>1</sub> PhR <sub>2</sub> | -487.7          | -513.6          | MR <sub>2</sub> PhR <sub>7</sub> | -482.9          | -511.7          | MR <sub>4</sub> PhR <sub>8</sub> | -470.5          | -491.0          |
| MR <sub>1</sub> PhR <sub>3</sub> | -482.6          | -509.3          | MR <sub>2</sub> PhR <sub>8</sub> | -479.0          | -503.4          | MR <sub>5</sub> PhR <sub>5</sub> | -434.3          | -466.6          |
| MR <sub>1</sub> PhR <sub>4</sub> | -477.5          | -502.0          | MR <sub>3</sub> PhR <sub>3</sub> | -487.2          | -517.3          | MR <sub>5</sub> PhR <sub>6</sub> | -463.4          | -484.5          |
| MR <sub>1</sub> PhR <sub>5</sub> | -454.2          | -483.5          | MR <sub>3</sub> PhR <sub>4</sub> | -487.8          | -512.2          | MR <sub>5</sub> PhR <sub>7</sub> | -451.3          | -480.8          |
| MR <sub>1</sub> PhR <sub>6</sub> | -482.1          | -501.2          | MR <sub>3</sub> PhR <sub>5</sub> | -463.6          | -493.5          | MR <sub>5</sub> PhR <sub>8</sub> | -446.3          | -472.3          |
| MR <sub>1</sub> PhR <sub>7</sub> | -470.1          | -497.5          | MR <sub>3</sub> PhR <sub>6</sub> | -492.1          | -511.6          | MR <sub>6</sub> PhR <sub>6</sub> | -483.9          | -502.8          |
| MR <sub>1</sub> PhR <sub>8</sub> | -463.8          | -489.0          | MR <sub>3</sub> PhR <sub>7</sub> | -480.4          | -507.6          | MR <sub>6</sub> PhR <sub>7</sub> | -480.0          | -498.7          |
| MR <sub>2</sub> PhR <sub>2</sub> | -499.1          | -526.5          | MR <sub>3</sub> PhR <sub>8</sub> | -475.7          | -499.8          | MR <sub>6</sub> PhR <sub>8</sub> | -475.0          | -490.5          |
| MR <sub>2</sub> PhR <sub>3</sub> | -496.1          | -521.8          | MR <sub>4</sub> PhR <sub>4</sub> | -482.4          | -503.9          | MR <sub>7</sub> PhR <sub>7</sub> | -467.5          | -495.0          |
| MR <sub>2</sub> PhR <sub>4</sub> | -491.0          | -516.0          | MR <sub>4</sub> PhR <sub>5</sub> | -458.5          | -485.5          | MR <sub>7</sub> PhR <sub>8</sub> | -463.1          | -486.4          |
| MR <sub>2</sub> PhR <sub>5</sub> | -468.3          | -497.6          | MR <sub>4</sub> PhR <sub>6</sub> | -486.9          | -503.3          | MR <sub>8</sub> PhR <sub>8</sub> | -458.4          | -478.1          |



**Table S23** Bond lengths and average bond lengths of the M-N bonds in  $\mathbf{M}(\mathbf{R}_l\mathbf{PhR}_r)(\mathbf{NO}_3)_3$  ( $l, r=1-8$ ) at the PBE0/6-311G(d)-RECP level

|                                                                  | R <sub>N1</sub> -Am | P <sub>N1</sub> -Am | P <sub>N2</sub> -Am | R <sub>N2</sub> -Am | N <sub>aver</sub> -Am | R <sub>N1</sub> -Eu | P <sub>N1</sub> -Eu | P <sub>N2</sub> -Eu | R <sub>N2</sub> -Eu | N <sub>aver</sub> -Eu |
|------------------------------------------------------------------|---------------------|---------------------|---------------------|---------------------|-----------------------|---------------------|---------------------|---------------------|---------------------|-----------------------|
| MR <sub>1</sub> PhR <sub>1</sub> (NO <sub>3</sub> ) <sub>3</sub> | 2.544               | 2.687               | 2.687               | 2.544               | 2.615                 | 2.564               | 2.686               | 2.699               | 2.542               | 2.623                 |
| MR <sub>1</sub> PhR <sub>2</sub> (NO <sub>3</sub> ) <sub>3</sub> | 2.608               | 2.698               | 2.675               | 2.604               | 2.646                 | 2.550               | 2.736               | 2.701               | 2.555               | 2.636                 |
| MR <sub>1</sub> PhR <sub>3</sub> (NO <sub>3</sub> ) <sub>3</sub> | 2.571               | 2.750               | 2.711               | 2.587               | 2.655                 | 2.549               | 2.736               | 2.695               | 2.552               | 2.633                 |
| MR <sub>1</sub> PhR <sub>4</sub> (NO <sub>3</sub> ) <sub>3</sub> | 2.558               | 2.678               | 2.688               | 2.614               | 2.634                 | 2.537               | 2.678               | 2.705               | 2.596               | 2.629                 |
| MR <sub>1</sub> PhR <sub>5</sub> (NO <sub>3</sub> ) <sub>3</sub> | 2.539               | 2.694               | 2.703               | 2.588               | 2.631                 | 2.529               | 2.687               | 2.690               | 2.582               | 2.622                 |
| MR <sub>1</sub> PhR <sub>6</sub> (NO <sub>3</sub> ) <sub>3</sub> | 2.562               | 2.711               | 2.706               | 2.602               | 2.645                 | 2.550               | 2.737               | 2.733               | 2.584               | 2.651                 |
| MR <sub>1</sub> PhR <sub>7</sub> (NO <sub>3</sub> ) <sub>3</sub> | 2.556               | 2.730               | 2.713               | 2.581               | 2.645                 | 2.544               | 2.740               | 2.709               | 2.568               | 2.640                 |
| MR <sub>1</sub> PhR <sub>8</sub> (NO <sub>3</sub> ) <sub>3</sub> | 2.563               | 2.750               | 2.727               | 2.588               | 2.657                 | 2.549               | 2.736               | 2.704               | 2.577               | 2.641                 |
| MR <sub>2</sub> PhR <sub>2</sub> (NO <sub>3</sub> ) <sub>3</sub> | 2.575               | 2.693               | 2.693               | 2.575               | 2.634                 | 2.575               | 2.679               | 2.679               | 2.575               | 2.627                 |
| MR <sub>2</sub> PhR <sub>3</sub> (NO <sub>3</sub> ) <sub>3</sub> | 2.578               | 2.702               | 2.691               | 2.589               | 2.640                 | 2.566               | 2.743               | 2.730               | 2.575               | 2.654                 |
| MR <sub>2</sub> PhR <sub>4</sub> (NO <sub>3</sub> ) <sub>3</sub> | 2.558               | 2.683               | 2.700               | 2.622               | 2.641                 | 2.550               | 2.658               | 2.678               | 2.621               | 2.627                 |
| MR <sub>2</sub> PhR <sub>5</sub> (NO <sub>3</sub> ) <sub>3</sub> | 2.554               | 2.688               | 2.716               | 2.585               | 2.636                 | 2.542               | 2.701               | 2.731               | 2.583               | 2.639                 |
| MR <sub>2</sub> PhR <sub>6</sub> (NO <sub>3</sub> ) <sub>3</sub> | 2.566               | 2.689               | 2.706               | 2.611               | 2.643                 | 2.536               | 2.701               | 2.737               | 2.598               | 2.643                 |
| MR <sub>2</sub> PhR <sub>7</sub> (NO <sub>3</sub> ) <sub>3</sub> | 2.567               | 2.705               | 2.710               | 2.583               | 2.641                 | 2.556               | 2.730               | 2.733               | 2.573               | 2.648                 |
| MR <sub>2</sub> PhR <sub>8</sub> (NO <sub>3</sub> ) <sub>3</sub> | 2.572               | 2.709               | 2.708               | 2.593               | 2.646                 | 2.553               | 2.776               | 2.749               | 2.579               | 2.664                 |
| MR <sub>3</sub> PhR <sub>3</sub> (NO <sub>3</sub> ) <sub>3</sub> | 2.623               | 2.691               | 2.692               | 2.623               | 2.657                 | 2.589               | 2.682               | 2.682               | 2.589               | 2.635                 |
| MR <sub>3</sub> PhR <sub>4</sub> (NO <sub>3</sub> ) <sub>3</sub> | 2.570               | 2.684               | 2.711               | 2.624               | 2.647                 | 2.571               | 2.657               | 2.680               | 2.628               | 2.634                 |
| MR <sub>3</sub> PhR <sub>5</sub> (NO <sub>3</sub> ) <sub>3</sub> | 2.573               | 2.708               | 2.761               | 2.594               | 2.659                 | 2.540               | 2.706               | 2.751               | 2.570               | 2.641                 |
| MR <sub>3</sub> PhR <sub>6</sub> (NO <sub>3</sub> ) <sub>3</sub> | 2.575               | 2.697               | 2.716               | 2.611               | 2.650                 | 2.567               | 2.672               | 2.693               | 2.605               | 2.635                 |
| MR <sub>3</sub> PhR <sub>7</sub> (NO <sub>3</sub> ) <sub>3</sub> | 2.582               | 2.703               | 2.719               | 2.586               | 2.648                 | 2.582               | 2.690               | 2.714               | 2.588               | 2.643                 |
| MR <sub>3</sub> PhR <sub>8</sub> (NO <sub>3</sub> ) <sub>3</sub> | 2.583               | 2.706               | 2.718               | 2.595               | 2.650                 | 2.583               | 2.704               | 2.708               | 2.596               | 2.648                 |
| MR <sub>4</sub> PhR <sub>4</sub> (NO <sub>3</sub> ) <sub>3</sub> | 2.613               | 2.662               | 2.662               | 2.613               | 2.638                 | 2.571               | 2.676               | 2.676               | 2.571               | 2.624                 |
| MR <sub>4</sub> PhR <sub>5</sub> (NO <sub>3</sub> ) <sub>3</sub> | 2.634               | 2.697               | 2.713               | 2.605               | 2.662                 | 2.601               | 2.694               | 2.698               | 2.572               | 2.641                 |
| MR <sub>4</sub> PhR <sub>6</sub> (NO <sub>3</sub> ) <sub>3</sub> | 2.611               | 2.713               | 2.705               | 2.594               | 2.656                 | 2.597               | 2.688               | 2.679               | 2.579               | 2.636                 |
| MR <sub>4</sub> PhR <sub>7</sub> (NO <sub>3</sub> ) <sub>3</sub> | 2.616               | 2.715               | 2.701               | 2.568               | 2.650                 | 2.615               | 2.694               | 2.678               | 2.562               | 2.637                 |
| MR <sub>4</sub> PhR <sub>8</sub> (NO <sub>3</sub> ) <sub>3</sub> | 2.618               | 2.720               | 2.703               | 2.577               | 2.654                 | 2.614               | 2.699               | 2.680               | 2.569               | 2.640                 |
| MR <sub>5</sub> PhR <sub>5</sub> (NO <sub>3</sub> ) <sub>3</sub> | 2.574               | 2.707               | 2.714               | 2.560               | 2.639                 | 2.570               | 2.694               | 2.708               | 2.554               | 2.631                 |
| MR <sub>5</sub> PhR <sub>6</sub> (NO <sub>3</sub> ) <sub>3</sub> | 2.582               | 2.734               | 2.715               | 2.592               | 2.656                 | 2.565               | 2.737               | 2.736               | 2.571               | 2.652                 |
| MR <sub>5</sub> PhR <sub>7</sub> (NO <sub>3</sub> ) <sub>3</sub> | 2.578               | 2.744               | 2.712               | 2.567               | 2.651                 | 2.575               | 2.737               | 2.709               | 2.552               | 2.643                 |
| MR <sub>5</sub> PhR <sub>8</sub> (NO <sub>3</sub> ) <sub>3</sub> | 2.586               | 2.764               | 2.726               | 2.576               | 2.663                 | 2.573               | 2.772               | 2.714               | 2.559               | 2.655                 |
| MR <sub>6</sub> PhR <sub>6</sub> (NO <sub>3</sub> ) <sub>3</sub> | 2.609               | 2.693               | 2.694               | 2.609               | 2.651                 | 2.551               | 2.705               | 2.705               | 2.551               | 2.628                 |
| MR <sub>6</sub> PhR <sub>7</sub> (NO <sub>3</sub> ) <sub>3</sub> | 2.602               | 2.722               | 2.715               | 2.575               | 2.653                 | 2.617               | 2.687               | 2.685               | 2.587               | 2.644                 |
| MR <sub>6</sub> PhR <sub>8</sub> (NO <sub>3</sub> ) <sub>3</sub> | 2.605               | 2.724               | 2.715               | 2.582               | 2.657                 | 2.607               | 2.688               | 2.686               | 2.590               | 2.643                 |
| MR <sub>7</sub> PhR <sub>7</sub> (NO <sub>3</sub> ) <sub>3</sub> | 2.587               | 2.727               | 2.727               | 2.587               | 2.657                 | 2.565               | 2.740               | 2.740               | 2.565               | 2.653                 |
| MR <sub>7</sub> PhR <sub>8</sub> (NO <sub>3</sub> ) <sub>3</sub> | 2.580               | 2.727               | 2.722               | 2.586               | 2.654                 | 2.557               | 2.786               | 2.787               | 2.572               | 2.676                 |
| MR <sub>8</sub> PhR <sub>8</sub> (NO <sub>3</sub> ) <sub>3</sub> | 2.589               | 2.724               | 2.724               | 2.589               | 2.656                 | 2.586               | 2.709               | 2.709               | 2.586               | 2.648                 |

**Table S24** Bond lengths and average bond lengths of the M-N bonds in  $\mathbf{M}(\mathbf{R}_l\mathbf{PhR}_r)(\mathbf{NO}_3)_3$  ( $l, r = 1-8$ ) at the PBE0/6-311G(d)-RECP level after subtracting the radius of the metals

|                                                                  | R <sub>N1</sub> -Am | P <sub>N1</sub> -Am | P <sub>N2</sub> -Am | R <sub>N2</sub> -Am | N <sub>aver</sub> -Am | R <sub>N1</sub> -Eu | P <sub>N1</sub> -Eu | P <sub>N2</sub> -Eu | R <sub>N2</sub> -Eu | N <sub>aver</sub> -Eu |
|------------------------------------------------------------------|---------------------|---------------------|---------------------|---------------------|-----------------------|---------------------|---------------------|---------------------|---------------------|-----------------------|
| MR <sub>1</sub> PhR <sub>1</sub> (NO <sub>3</sub> ) <sub>3</sub> | 1.569               | 1.712               | 1.712               | 1.569               | 1.640                 | 1.617               | 1.739               | 1.752               | 1.595               | 1.676                 |
| MR <sub>1</sub> PhR <sub>2</sub> (NO <sub>3</sub> ) <sub>3</sub> | 1.633               | 1.723               | 1.700               | 1.629               | 1.671                 | 1.603               | 1.789               | 1.754               | 1.608               | 1.689                 |
| MR <sub>1</sub> PhR <sub>3</sub> (NO <sub>3</sub> ) <sub>3</sub> | 1.596               | 1.775               | 1.736               | 1.612               | 1.680                 | 1.602               | 1.789               | 1.748               | 1.605               | 1.686                 |
| MR <sub>1</sub> PhR <sub>4</sub> (NO <sub>3</sub> ) <sub>3</sub> | 1.583               | 1.703               | 1.713               | 1.639               | 1.659                 | 1.590               | 1.731               | 1.758               | 1.649               | 1.682                 |
| MR <sub>1</sub> PhR <sub>5</sub> (NO <sub>3</sub> ) <sub>3</sub> | 1.564               | 1.719               | 1.728               | 1.613               | 1.656                 | 1.582               | 1.740               | 1.743               | 1.635               | 1.675                 |
| MR <sub>1</sub> PhR <sub>6</sub> (NO <sub>3</sub> ) <sub>3</sub> | 1.587               | 1.736               | 1.731               | 1.627               | 1.670                 | 1.603               | 1.790               | 1.786               | 1.637               | 1.704                 |
| MR <sub>1</sub> PhR <sub>7</sub> (NO <sub>3</sub> ) <sub>3</sub> | 1.581               | 1.755               | 1.738               | 1.606               | 1.670                 | 1.597               | 1.793               | 1.762               | 1.621               | 1.693                 |
| MR <sub>1</sub> PhR <sub>8</sub> (NO <sub>3</sub> ) <sub>3</sub> | 1.588               | 1.775               | 1.752               | 1.613               | 1.682                 | 1.602               | 1.789               | 1.757               | 1.630               | 1.694                 |
| MR <sub>2</sub> PhR <sub>2</sub> (NO <sub>3</sub> ) <sub>3</sub> | 1.600               | 1.718               | 1.718               | 1.600               | 1.659                 | 1.628               | 1.732               | 1.732               | 1.628               | 1.680                 |
| MR <sub>2</sub> PhR <sub>3</sub> (NO <sub>3</sub> ) <sub>3</sub> | 1.603               | 1.727               | 1.716               | 1.614               | 1.665                 | 1.619               | 1.796               | 1.783               | 1.628               | 1.707                 |
| MR <sub>2</sub> PhR <sub>4</sub> (NO <sub>3</sub> ) <sub>3</sub> | 1.583               | 1.708               | 1.725               | 1.647               | 1.666                 | 1.603               | 1.711               | 1.731               | 1.674               | 1.680                 |
| MR <sub>2</sub> PhR <sub>5</sub> (NO <sub>3</sub> ) <sub>3</sub> | 1.579               | 1.713               | 1.741               | 1.610               | 1.661                 | 1.595               | 1.754               | 1.784               | 1.636               | 1.692                 |
| MR <sub>2</sub> PhR <sub>6</sub> (NO <sub>3</sub> ) <sub>3</sub> | 1.591               | 1.714               | 1.731               | 1.636               | 1.668                 | 1.589               | 1.754               | 1.790               | 1.651               | 1.696                 |
| MR <sub>2</sub> PhR <sub>7</sub> (NO <sub>3</sub> ) <sub>3</sub> | 1.592               | 1.730               | 1.735               | 1.608               | 1.666                 | 1.609               | 1.783               | 1.786               | 1.626               | 1.701                 |
| MR <sub>2</sub> PhR <sub>8</sub> (NO <sub>3</sub> ) <sub>3</sub> | 1.597               | 1.734               | 1.733               | 1.618               | 1.671                 | 1.606               | 1.829               | 1.802               | 1.632               | 1.717                 |
| MR <sub>3</sub> PhR <sub>3</sub> (NO <sub>3</sub> ) <sub>3</sub> | 1.648               | 1.716               | 1.717               | 1.648               | 1.682                 | 1.642               | 1.735               | 1.735               | 1.642               | 1.688                 |
| MR <sub>3</sub> PhR <sub>4</sub> (NO <sub>3</sub> ) <sub>3</sub> | 1.595               | 1.709               | 1.736               | 1.649               | 1.672                 | 1.624               | 1.710               | 1.733               | 1.681               | 1.687                 |
| MR <sub>3</sub> PhR <sub>5</sub> (NO <sub>3</sub> ) <sub>3</sub> | 1.598               | 1.733               | 1.786               | 1.619               | 1.684                 | 1.593               | 1.759               | 1.804               | 1.623               | 1.694                 |
| MR <sub>3</sub> PhR <sub>6</sub> (NO <sub>3</sub> ) <sub>3</sub> | 1.600               | 1.722               | 1.741               | 1.636               | 1.675                 | 1.620               | 1.725               | 1.746               | 1.658               | 1.688                 |
| MR <sub>3</sub> PhR <sub>7</sub> (NO <sub>3</sub> ) <sub>3</sub> | 1.607               | 1.728               | 1.744               | 1.611               | 1.673                 | 1.635               | 1.743               | 1.767               | 1.641               | 1.696                 |
| MR <sub>3</sub> PhR <sub>8</sub> (NO <sub>3</sub> ) <sub>3</sub> | 1.608               | 1.731               | 1.743               | 1.620               | 1.675                 | 1.636               | 1.757               | 1.761               | 1.649               | 1.701                 |
| MR <sub>4</sub> PhR <sub>4</sub> (NO <sub>3</sub> ) <sub>3</sub> | 1.638               | 1.687               | 1.687               | 1.638               | 1.663                 | 1.624               | 1.729               | 1.729               | 1.624               | 1.677                 |
| MR <sub>4</sub> PhR <sub>5</sub> (NO <sub>3</sub> ) <sub>3</sub> | 1.659               | 1.722               | 1.738               | 1.630               | 1.687                 | 1.654               | 1.747               | 1.751               | 1.625               | 1.694                 |
| MR <sub>4</sub> PhR <sub>6</sub> (NO <sub>3</sub> ) <sub>3</sub> | 1.636               | 1.738               | 1.730               | 1.619               | 1.681                 | 1.650               | 1.741               | 1.732               | 1.632               | 1.689                 |
| MR <sub>4</sub> PhR <sub>7</sub> (NO <sub>3</sub> ) <sub>3</sub> | 1.641               | 1.740               | 1.726               | 1.593               | 1.675                 | 1.668               | 1.747               | 1.731               | 1.615               | 1.690                 |
| MR <sub>4</sub> PhR <sub>8</sub> (NO <sub>3</sub> ) <sub>3</sub> | 1.643               | 1.745               | 1.728               | 1.602               | 1.679                 | 1.667               | 1.752               | 1.733               | 1.622               | 1.693                 |
| MR <sub>5</sub> PhR <sub>5</sub> (NO <sub>3</sub> ) <sub>3</sub> | 1.599               | 1.732               | 1.739               | 1.585               | 1.664                 | 1.623               | 1.747               | 1.761               | 1.607               | 1.684                 |
| MR <sub>5</sub> PhR <sub>6</sub> (NO <sub>3</sub> ) <sub>3</sub> | 1.607               | 1.759               | 1.740               | 1.617               | 1.681                 | 1.618               | 1.790               | 1.789               | 1.624               | 1.705                 |
| MR <sub>5</sub> PhR <sub>7</sub> (NO <sub>3</sub> ) <sub>3</sub> | 1.603               | 1.769               | 1.737               | 1.592               | 1.676                 | 1.628               | 1.790               | 1.762               | 1.605               | 1.696                 |
| MR <sub>5</sub> PhR <sub>8</sub> (NO <sub>3</sub> ) <sub>3</sub> | 1.611               | 1.789               | 1.751               | 1.601               | 1.688                 | 1.626               | 1.825               | 1.767               | 1.612               | 1.708                 |
| MR <sub>6</sub> PhR <sub>6</sub> (NO <sub>3</sub> ) <sub>3</sub> | 1.634               | 1.718               | 1.719               | 1.634               | 1.676                 | 1.604               | 1.758               | 1.758               | 1.604               | 1.681                 |
| MR <sub>6</sub> PhR <sub>7</sub> (NO <sub>3</sub> ) <sub>3</sub> | 1.627               | 1.747               | 1.740               | 1.600               | 1.678                 | 1.670               | 1.740               | 1.738               | 1.640               | 1.697                 |
| MR <sub>6</sub> PhR <sub>8</sub> (NO <sub>3</sub> ) <sub>3</sub> | 1.630               | 1.749               | 1.740               | 1.607               | 1.682                 | 1.660               | 1.741               | 1.739               | 1.643               | 1.696                 |
| MR <sub>7</sub> PhR <sub>7</sub> (NO <sub>3</sub> ) <sub>3</sub> | 1.612               | 1.752               | 1.752               | 1.612               | 1.682                 | 1.618               | 1.793               | 1.793               | 1.618               | 1.706                 |
| MR <sub>7</sub> PhR <sub>8</sub> (NO <sub>3</sub> ) <sub>3</sub> | 1.605               | 1.752               | 1.747               | 1.611               | 1.679                 | 1.610               | 1.839               | 1.840               | 1.625               | 1.729                 |
| MR <sub>8</sub> PhR <sub>8</sub> (NO <sub>3</sub> ) <sub>3</sub> | 1.614               | 1.749               | 1.749               | 1.614               | 1.681                 | 1.639               | 1.762               | 1.762               | 1.639               | 1.701                 |

**Table S25** Gibbs free energy  $\Delta G_M$  and  $\Delta\Delta G_{Am/Eu}$  (kcal/mol) of the solvent extraction process in the gas phase calculated by the PBE0/6-311G(d)-RECP method

|                                                                  | $\Delta G_{Am}(\text{gas})$ | $\Delta G_{Eu}(\text{gas})$ | $\Delta\Delta G_{Am/Eu}$ |                                                                  | $\Delta G_{Am}(\text{gas})$ | $\Delta G_{Eu}(\text{gas})$ | $\Delta\Delta G_{Am/Eu}$ |
|------------------------------------------------------------------|-----------------------------|-----------------------------|--------------------------|------------------------------------------------------------------|-----------------------------|-----------------------------|--------------------------|
| MR <sub>1</sub> PhR <sub>1</sub> (NO <sub>3</sub> ) <sub>3</sub> | -546.9                      | -548.7                      | 1.8                      | MR <sub>3</sub> PhR <sub>6</sub> (NO <sub>3</sub> ) <sub>3</sub> | -536.5                      | -536.1                      | -0.4                     |
| MR <sub>1</sub> PhR <sub>2</sub> (NO <sub>3</sub> ) <sub>3</sub> | -547.3                      | -548.8                      | 1.5                      | MR <sub>3</sub> PhR <sub>7</sub> (NO <sub>3</sub> ) <sub>3</sub> | -541.9                      | -541.9                      | 0.0                      |
| MR <sub>1</sub> PhR <sub>3</sub> (NO <sub>3</sub> ) <sub>3</sub> | -545.4                      | -542.2                      | -3.2                     | MR <sub>3</sub> PhR <sub>8</sub> (NO <sub>3</sub> ) <sub>3</sub> | -538.5                      | -538.6                      | 0.2                      |
| MR <sub>1</sub> PhR <sub>4</sub> (NO <sub>3</sub> ) <sub>3</sub> | -540.4                      | -541.5                      | 1.0                      | MR <sub>4</sub> PhR <sub>4</sub> (NO <sub>3</sub> ) <sub>3</sub> | -534.3                      | -527.3                      | -7.0                     |
| MR <sub>1</sub> PhR <sub>5</sub> (NO <sub>3</sub> ) <sub>3</sub> | -543.6                      | -542.3                      | -1.3                     | MR <sub>4</sub> PhR <sub>5</sub> (NO <sub>3</sub> ) <sub>3</sub> | -534.7                      | -535.8                      | 1.2                      |
| MR <sub>1</sub> PhR <sub>6</sub> (NO <sub>3</sub> ) <sub>3</sub> | -539.3                      | -539.0                      | -0.3                     | MR <sub>4</sub> PhR <sub>6</sub> (NO <sub>3</sub> ) <sub>3</sub> | -532.6                      | -532.4                      | -0.2                     |
| MR <sub>1</sub> PhR <sub>7</sub> (NO <sub>3</sub> ) <sub>3</sub> | -545.5                      | -546.1                      | 0.7                      | MR <sub>4</sub> PhR <sub>7</sub> (NO <sub>3</sub> ) <sub>3</sub> | -537.3                      | -537.2                      | -0.1                     |
| MR <sub>1</sub> PhR <sub>8</sub> (NO <sub>3</sub> ) <sub>3</sub> | -541.6                      | -540.4                      | -1.3                     | MR <sub>4</sub> PhR <sub>8</sub> (NO <sub>3</sub> ) <sub>3</sub> | -533.8                      | -533.7                      | 0.0                      |
| MR <sub>2</sub> PhR <sub>2</sub> (NO <sub>3</sub> ) <sub>3</sub> | -547.5                      | -545.6                      | -1.9                     | MR <sub>5</sub> PhR <sub>5</sub> (NO <sub>3</sub> ) <sub>3</sub> | -537.6                      | -536.6                      | -1.0                     |
| MR <sub>2</sub> PhR <sub>3</sub> (NO <sub>3</sub> ) <sub>3</sub> | -544.6                      | -545.6                      | 1.0                      | MR <sub>5</sub> PhR <sub>6</sub> (NO <sub>3</sub> ) <sub>3</sub> | -534.5                      | -535.6                      | 1.1                      |
| MR <sub>2</sub> PhR <sub>4</sub> (NO <sub>3</sub> ) <sub>3</sub> | -540.1                      | -539.8                      | -0.3                     | MR <sub>5</sub> PhR <sub>7</sub> (NO <sub>3</sub> ) <sub>3</sub> | -540.3                      | -541.0                      | 0.7                      |
| MR <sub>2</sub> PhR <sub>5</sub> (NO <sub>3</sub> ) <sub>3</sub> | -543.6                      | -543.9                      | 0.3                      | MR <sub>5</sub> PhR <sub>8</sub> (NO <sub>3</sub> ) <sub>3</sub> | -536.5                      | -535.0                      | -1.5                     |
| MR <sub>2</sub> PhR <sub>6</sub> (NO <sub>3</sub> ) <sub>3</sub> | -539.7                      | -538.1                      | -1.6                     | MR <sub>6</sub> PhR <sub>6</sub> (NO <sub>3</sub> ) <sub>3</sub> | -532.2                      | -527.0                      | -5.2                     |
| MR <sub>2</sub> PhR <sub>7</sub> (NO <sub>3</sub> ) <sub>3</sub> | -545.5                      | -545.7                      | 0.2                      | MR <sub>6</sub> PhR <sub>7</sub> (NO <sub>3</sub> ) <sub>3</sub> | -536.4                      | -535.4                      | -1.0                     |
| MR <sub>2</sub> PhR <sub>8</sub> (NO <sub>3</sub> ) <sub>3</sub> | -541.3                      | -542.0                      | 0.7                      | MR <sub>6</sub> PhR <sub>8</sub> (NO <sub>3</sub> ) <sub>3</sub> | -533.3                      | -531.7                      | -1.6                     |
| MR <sub>3</sub> PhR <sub>3</sub> (NO <sub>3</sub> ) <sub>3</sub> | -540.8                      | -541.3                      | 0.5                      | MR <sub>7</sub> PhR <sub>7</sub> (NO <sub>3</sub> ) <sub>3</sub> | -543.1                      | -520.0                      | -1.1                     |
| MR <sub>3</sub> PhR <sub>4</sub> (NO <sub>3</sub> ) <sub>3</sub> | -537.2                      | -534.9                      | -2.3                     | MR <sub>7</sub> PhR <sub>8</sub> (NO <sub>3</sub> ) <sub>3</sub> | -538.4                      | -539.2                      | 0.8                      |
| MR <sub>3</sub> PhR <sub>5</sub> (NO <sub>3</sub> ) <sub>3</sub> | -540.4                      | -537.2                      | -3.2                     | MR <sub>8</sub> PhR <sub>8</sub> (NO <sub>3</sub> ) <sub>3</sub> | -536.1                      | -535.1                      | -1.0                     |

**Table S26** Averaged electron density ( $\rho$ ), Laplacian ( $\nabla^2\rho$ ), local electron energy density ( $H(r)$ ) and delocalization indices  $\delta$  at the N-M and O-M BCPs for the MR<sub>i</sub>Ph (NO<sub>3</sub>)<sub>3</sub> calculated in the PBE0/6-311G(d)-RECP level

|                                                    | $N_{R-M}$     | $N_{Ph-M}$                | O-M           | $N_{R-M}$   | $N_{Ph-M}$                   | O-M         |
|----------------------------------------------------|---------------|---------------------------|---------------|-------------|------------------------------|-------------|
| Complexes                                          |               | $\rho(\text{Am/Eu})$      |               |             | $\nabla^2\rho(\text{Am/Eu})$ |             |
| MR <sub>1</sub> Ph (NO <sub>3</sub> ) <sub>3</sub> | 0.049/0.045   | 0.041/0.038               | 0.051/0.051   | 0.176/0.160 | 0.138/0.127                  | 0.198/0.193 |
| MR <sub>2</sub> Ph(NO <sub>3</sub> ) <sub>3</sub>  | 0.046/0.042   | 0.042/0.038               | 0.052/0.051   | 0.159/0.145 | 0.141/0.131                  | 0.200/0.194 |
| MR <sub>3</sub> Ph(NO <sub>3</sub> ) <sub>3</sub>  | 0.045/0.043   | 0.041/0.037               | 0.052/0.051   | 0.154/0.143 | 0.139/0.129                  | 0.201/0.195 |
| MR <sub>4</sub> Ph(NO <sub>3</sub> ) <sub>3</sub>  | 0.042/0.038   | 0.040/0.037               | 0.053/0.052   | 0.152/0.137 | 0.136/0.126                  | 0.203/0.197 |
| MR <sub>5</sub> Ph(NO <sub>3</sub> ) <sub>3</sub>  | 0.042/0.038   | 0.041/0.039               | 0.053/0.052   | 0.152/0.141 | 0.138/0.129                  | 0.203/0.196 |
| MR <sub>6</sub> Ph(NO <sub>3</sub> ) <sub>3</sub>  | 0.044/0.043   | 0.039/0.035               | 0.053/0.052   | 0.153/0.143 | 0.133/0.123                  | 0.203/0.197 |
| MR <sub>7</sub> Ph(NO <sub>3</sub> ) <sub>3</sub>  | 0.047/0.043   | 0.040/0.037               | 0.052/0.052   | 0.168/0.153 | 0.136/0.125                  | 0.200/0.195 |
| MR <sub>8</sub> Ph(NO <sub>3</sub> ) <sub>3</sub>  | 0.047/0.043   | 0.039/0.036               | 0.052/0.052   | 0.164/0.149 | 0.134/0.123                  | 0.202/0.196 |
|                                                    |               | $H(r)*10^2(\text{Am/Eu})$ |               |             | $\delta(\text{Am/Eu})$       |             |
| MR <sub>1</sub> Ph (NO <sub>3</sub> ) <sub>3</sub> | -0.353/-0.150 | -0.186/-0.016             | -0.235/-0.212 | 0.268/0.221 | 0.240/0.197                  | 0.286/0.250 |
| MR <sub>2</sub> Ph(NO <sub>3</sub> ) <sub>3</sub>  | -0.249/-0.095 | -0.209/-0.015             | -0.239/-0.219 | 0.261/0.216 | 0.240/0.198                  | 0.288/0.259 |
| MR <sub>3</sub> Ph(NO <sub>3</sub> ) <sub>3</sub>  | -0.247/-0.134 | -0.182/0.008              | -0.246/-0.222 | 0.259/0.225 | 0.233/0.194                  | 0.290/0.257 |
| MR <sub>4</sub> Ph(NO <sub>3</sub> ) <sub>3</sub>  | -0.169/0.026  | -0.167/0.009              | -0.262/-0.256 | 0.234/0.190 | 0.231/0.190                  | 0.294/0.265 |
| MR <sub>5</sub> Ph(NO <sub>3</sub> ) <sub>3</sub>  | -0.117/0.033  | -0.201/-0.035             | -0.261/-0.235 | 0.227/0.185 | 0.238/0.205                  | 0.293/0.250 |
| MR <sub>6</sub> Ph(NO <sub>3</sub> ) <sub>3</sub>  | -0.222/-0.104 | -0.132/0.050              | -0.258/-0.249 | 0.246/0.221 | 0.221/0.178                  | 0.294/0.262 |

|                                                   |               |              |               |             |             |             |
|---------------------------------------------------|---------------|--------------|---------------|-------------|-------------|-------------|
| MR <sub>7</sub> Ph(NO <sub>3</sub> ) <sub>3</sub> | -0.300/-0.096 | -0.165/0.007 | -0.246/-0.230 | 0.263/0.216 | 0.233/0.189 | 0.290/0.261 |
| MR <sub>8</sub> Ph(NO <sub>3</sub> ) <sub>3</sub> | -0.297/-0.093 | -0.137/0.038 | -0.255/-0.245 | 0.263/0.216 | 0.225/0.184 | 0.293/0.264 |

**Table S27** Averaged electron density ( $\rho$ ), Laplacian ( $\nabla^2\rho$ ), local electron energy density ( $H(r)$ ) and delocalization indices  $\delta$  at the N-M and O-M BCPs for the MR<sub>r</sub>PhR<sub>r</sub>(NO<sub>3</sub>)<sub>3</sub> calculated in the PBE0/6-311G(d)-RECP level

|                                                                  | N <sub>R</sub> -M | N <sub>Ph</sub> -M        | O-M           | N <sub>R</sub> -M | N <sub>Ph</sub> -M           | O-M         |
|------------------------------------------------------------------|-------------------|---------------------------|---------------|-------------------|------------------------------|-------------|
| Complexes                                                        |                   | $\rho(\text{Am/Eu})$      |               |                   | $\nabla^2\rho(\text{Am/Eu})$ |             |
| MR <sub>1</sub> PhR <sub>1</sub> (NO <sub>3</sub> ) <sub>3</sub> | 0.048/0.041       | 0.036/0.031               | 0.067/0.046   | 0.161/0.144       | 0.118/0.108                  | 0.177/0.143 |
| MR <sub>2</sub> PhR <sub>2</sub> (NO <sub>3</sub> ) <sub>3</sub> | 0.045/0.040       | 0.036/0.032               | 0.047/0.045   | 0.146/0.134       | 0.121/0.113                  | 0.176/0.170 |
| MR <sub>3</sub> PhR <sub>3</sub> (NO <sub>3</sub> ) <sub>3</sub> | 0.042/0.039       | 0.036/0.032               | 0.049/0.046   | 0.137/0.130       | 0.121/0.113                  | 0.177/0.171 |
| MR <sub>4</sub> PhR <sub>4</sub> (NO <sub>3</sub> ) <sub>3</sub> | 0.042/0.040       | 0.038/0.032               | 0.050/0.047   | 0.144/0.138       | 0.130/0.115                  | 0.185/0.174 |
| MR <sub>5</sub> PhR <sub>5</sub> (NO <sub>3</sub> ) <sub>3</sub> | 0.045/0.040       | 0.035/0.031               | 0.049/0.047   | 0.154/0.142       | 0.115/0.106                  | 0.183/0.178 |
| MR <sub>6</sub> PhR <sub>6</sub> (NO <sub>3</sub> ) <sub>3</sub> | 0.043/0.042       | 0.035/0.030               | 0.050/0.046   | 0.144/0.141       | 0.123/0.109                  | 0.185/0.173 |
| MR <sub>7</sub> PhR <sub>7</sub> (NO <sub>3</sub> ) <sub>3</sub> | 0.044/0.040       | 0.033/0.028               | 0.050/0.047   | 0.152/0.144       | 0.109/0.097                  | 0.184/0.177 |
| MR <sub>8</sub> PhR <sub>8</sub> (NO <sub>3</sub> ) <sub>3</sub> | 0.044/0.038       | 0.034/0.030               | 0.049/0.047   | 0.143/0.132       | 0.115/0.107                  | 0.181/0.146 |
|                                                                  |                   | $H(r)*10^2(\text{Am/Eu})$ |               |                   | $\delta(\text{Am/Eu})$       |             |
| MR <sub>1</sub> PhR <sub>1</sub> (NO <sub>3</sub> ) <sub>3</sub> | -0.374/-0.081     | -0.129/0.095              | -0.253/-0.104 | 0.265/0.205       | 0.209/0.163                  | 0.253/0.229 |
| MR <sub>2</sub> PhR <sub>2</sub> (NO <sub>3</sub> ) <sub>3</sub> | -0.316/-0.061     | -0.130/0.097              | -0.254/-0.091 | 0.251/0.202       | 0.201/0.165                  | 0.258/0.230 |
| MR <sub>3</sub> PhR <sub>3</sub> (NO <sub>3</sub> ) <sub>3</sub> | -0.270/-0.043     | -0.103/0.118              | -0.284/-0.108 | 0.222/0.199       | 0.201/0.158                  | 0.266/0.234 |
| MR <sub>4</sub> PhR <sub>4</sub> (NO <sub>3</sub> ) <sub>3</sub> | -0.224/-0.020     | -0.140/0.115              | -0.320/-0.141 | 0.219/0.194       | 0.212/0.159                  | 0.275/0.244 |
| MR <sub>5</sub> PhR <sub>5</sub> (NO <sub>3</sub> ) <sub>3</sub> | -0.275/-0.022     | -0.112/0.103              | -0.306/-0.139 | 0.239/0.192       | 0.197/0.160                  | 0.265/0.237 |
| MR <sub>6</sub> PhR <sub>6</sub> (NO <sub>3</sub> ) <sub>3</sub> | -0.266/-0.102     | -0.069/0.157              | -0.322/-0.135 | 0.227/0.212       | 0.194/0.144                  | 0.276/0.236 |
| MR <sub>7</sub> PhR <sub>7</sub> (NO <sub>3</sub> ) <sub>3</sub> | -0.302/-0.038     | -0.054/0.141              | -0.303/-0.141 | 0.241/0.200       | 0.189/0.145                  | 0.268/0.239 |
| MR <sub>8</sub> PhR <sub>8</sub> (NO <sub>3</sub> ) <sub>3</sub> | -0.269/-0.022     | -0.065/0.148              | -0.299/-0.135 | 0.241/0.195       | 0.181/0.147                  | 0.269/0.240 |

**Table S28** The  $\Delta E_{ij}^{(2)}$  of N-M interactions and the occupation numbers (ON) of the MR<sub>r</sub>Ph(NO<sub>3</sub>)<sub>3</sub>(Am/Eu) were calculated using the PBE0/6-311G(d)-RECP method.

|                                                    | ON( $\alpha$ -spin) | ON( $\beta$ -spin) | ON( $\alpha+\beta$ ) | $\Delta E_{ij}^{(2)}$ ( $\alpha$ -spin) | $\Delta E_{ij}^{(2)}$ ( $\beta$ -spin) | $\Delta E_{ij}^{(2)}$ ( $\alpha+\beta$ ) |
|----------------------------------------------------|---------------------|--------------------|----------------------|-----------------------------------------|----------------------------------------|------------------------------------------|
| AmR <sub>1</sub> Ph(NO <sub>3</sub> ) <sub>3</sub> | 0.2946              | 0.2504             | 0.5450               | 27.55                                   | 25.81                                  | 53.36                                    |
| EuR <sub>1</sub> Ph(NO <sub>3</sub> ) <sub>3</sub> | 0.2633              | 0.1959             | 0.4592               | 22.11                                   | 22.55                                  | 44.66                                    |
| AmR <sub>2</sub> Ph(NO <sub>3</sub> ) <sub>3</sub> | 0.2693              | 0.2493             | 0.5186               | 29.30                                   | 25.93                                  | 55.23                                    |
| EuR <sub>2</sub> Ph(NO <sub>3</sub> ) <sub>3</sub> | 0.2635              | 0.1957             | 0.4592               | 21.92                                   | 21.91                                  | 43.83                                    |
| AmR <sub>3</sub> Ph(NO <sub>3</sub> ) <sub>3</sub> | 0.2642              | 0.1953             | 0.4595               | 25.74                                   | 24.08                                  | 49.82                                    |
| EuR <sub>3</sub> Ph(NO <sub>3</sub> ) <sub>3</sub> | 0.2642              | 0.1953             | 0.4595               | 22.57                                   | 21.01                                  | 43.58                                    |
| AmR <sub>4</sub> Ph(NO <sub>3</sub> ) <sub>3</sub> | 0.2952              | 0.2602             | 0.5554               | 24.11                                   | 22.05                                  | 46.16                                    |
| EuR <sub>4</sub> Ph(NO <sub>3</sub> ) <sub>3</sub> | 0.2568              | 0.1961             | 0.4529               | 20.77                                   | 18.50                                  | 39.27                                    |
| AmR <sub>5</sub> Ph(NO <sub>3</sub> ) <sub>3</sub> | 0.2976              | 0.2611             | 0.5587               | 26.79                                   | 23.53                                  | 50.32                                    |
| EuR <sub>5</sub> Ph(NO <sub>3</sub> ) <sub>3</sub> | 0.2653              | 0.1954             | 0.4607               | 21.28                                   | 21.37                                  | 42.65                                    |
| AmR <sub>6</sub> Ph(NO <sub>3</sub> ) <sub>3</sub> | 0.2938              | 0.2585             | 0.5523               | 22.74                                   | 22.17                                  | 44.91                                    |

|                                                    |        |        |        |       |       |       |
|----------------------------------------------------|--------|--------|--------|-------|-------|-------|
| EuR <sub>6</sub> Ph(NO <sub>3</sub> ) <sub>3</sub> | 0.2596 | 0.195  | 0.4546 | 19.61 | 18.30 | 37.91 |
| AmR <sub>7</sub> Ph(NO <sub>3</sub> ) <sub>3</sub> | 0.2953 | 0.2602 | 0.5555 | 20.22 | 24.41 | 44.63 |
| EuR <sub>7</sub> Ph(NO <sub>3</sub> ) <sub>3</sub> | 0.2651 | 0.1953 | 0.4604 | 21.54 | 21.44 | 42.98 |
| AmR <sub>8</sub> Ph(NO <sub>3</sub> ) <sub>3</sub> | 0.2956 | 0.2601 | 0.5557 | 24.67 | 22.51 | 47.18 |
| EuR <sub>8</sub> Ph(NO <sub>3</sub> ) <sub>3</sub> | 0.2565 | 0.1957 | 0.4522 | 20.43 | 18.48 | 38.91 |

**Table S29** The second-order stabilization energy ( $\Delta E_{ij}^{(2)}$ ) of donor-acceptor interactions and the ON on the  $7s/6s$ ,  $6d/5d$  and  $5f/4f$  orbitals of the Am/Eu for MR<sub>*i*</sub>Ph (NO<sub>3</sub>)<sub>3</sub> calculated by the PBE0/6-311G\*-RECP method

|                                                    |                | $\Delta E_{ij}^{(2)} s$ | $\Delta E_{ij}^{(2)} d$ | $\Delta E_{ij}^{(2)} f$ | ON <i>s</i> | ON <i>d</i> | ON <i>f</i> |
|----------------------------------------------------|----------------|-------------------------|-------------------------|-------------------------|-------------|-------------|-------------|
| AmR <sub>1</sub> Ph(NO <sub>3</sub> ) <sub>3</sub> | $\alpha$ -spin | 20.15                   | 4.82                    | 2.58                    | 0.1176      | 0.0975      | 0.0795      |
|                                                    | $\beta$ -spin  | 19.25                   | 1.84                    | 4.72                    | 0.1090      | 0.0468      | 0.0946      |
| EuR <sub>1</sub> Ph(NO <sub>3</sub> ) <sub>3</sub> | $\alpha$ -spin | 17.82                   | 3.95                    | 0.34                    | 0.1039      | 0.1072      | 0.0522      |
|                                                    | $\beta$ -spin  | 17.17                   | 4.00                    | 1.38                    | 0.0997      | 0.0737      | 0.0225      |
| AmR <sub>2</sub> Ph(NO <sub>3</sub> ) <sub>3</sub> | $\alpha$ -spin | 20.22                   | 6.65                    | 2.43                    | 0.1176      | 0.0984      | 0.0533      |
|                                                    | $\beta$ -spin  | 18.84                   | 2.37                    | 4.72                    | 0.1097      | 0.0491      | 0.0905      |
| EuR <sub>2</sub> Ph(NO <sub>3</sub> ) <sub>3</sub> | $\alpha$ -spin | 17.41                   | 4.08                    | 0.43                    | 0.1038      | 0.1069      | 0.0528      |
|                                                    | $\beta$ -spin  | 16.74                   | 3.89                    | 1.28                    | 0.0996      | 0.0740      | 0.0221      |
| AmR <sub>3</sub> Ph(NO <sub>3</sub> ) <sub>3</sub> | $\alpha$ -spin | 19.36                   | 4.62                    | 1.76                    | 0.1031      | 0.1074      | 0.0537      |
|                                                    | $\beta$ -spin  | 18.15                   | 1.80                    | 4.13                    | 0.0989      | 0.0747      | 0.0217      |
| EuR <sub>3</sub> Ph(NO <sub>3</sub> ) <sub>3</sub> | $\alpha$ -spin | 16.97                   | 5.12                    | 0.48                    | 0.1031      | 0.1074      | 0.0537      |
|                                                    | $\beta$ -spin  | 16.32                   | 3.61                    | 1.08                    | 0.0989      | 0.0747      | 0.0217      |
| AmR <sub>4</sub> Ph(NO <sub>3</sub> ) <sub>3</sub> | $\alpha$ -spin | 18.79                   | 3.94                    | 1.38                    | 0.1162      | 0.0989      | 0.0801      |
|                                                    | $\beta$ -spin  | 17.52                   | 1.29                    | 3.24                    | 0.1078      | 0.0559      | 0.0965      |
| EuR <sub>4</sub> Ph(NO <sub>3</sub> ) <sub>3</sub> | $\alpha$ -spin | 16.61                   | 2.68                    | 1.48                    | 0.1027      | 0.1094      | 0.0447      |
|                                                    | $\beta$ -spin  | 16.05                   | 2.07                    | 0.38                    | 0.0985      | 0.0762      | 0.0214      |
| AmR <sub>5</sub> Ph(NO <sub>3</sub> ) <sub>3</sub> | $\alpha$ -spin | 19.52                   | 4.84                    | 2.43                    | 0.1170      | 0.0976      | 0.0830      |
|                                                    | $\beta$ -spin  | 18.63                   | 0.75                    | 4.15                    | 0.1086      | 0.0540      | 0.0985      |
| EuR <sub>5</sub> Ph(NO <sub>3</sub> ) <sub>3</sub> | $\alpha$ -spin | 17.33                   | 3.63                    | 0.32                    | 0.1034      | 0.1076      | 0.0543      |
|                                                    | $\beta$ -spin  | 16.72                   | 3.38                    | 1.27                    | 0.0992      | 0.0735      | 0.0227      |
| AmR <sub>6</sub> Ph(NO <sub>3</sub> ) <sub>3</sub> | $\alpha$ -spin | 18.41                   | 3.09                    | 1.24                    | 0.1156      | 0.0996      | 0.0786      |
|                                                    | $\beta$ -spin  | 17.11                   | 1.54                    | 3.52                    | 0.1070      | 0.0567      | 0.0948      |
| EuR <sub>6</sub> Ph(NO <sub>3</sub> ) <sub>3</sub> | $\alpha$ -spin | 16.48                   | 1.77                    | 1.36                    | 0.1020      | 0.1094      | 0.0482      |
|                                                    | $\beta$ -spin  | 16.02                   | 1.86                    | 0.42                    | 0.0978      | 0.0770      | 0.0202      |
| AmR <sub>7</sub> Ph(NO <sub>3</sub> ) <sub>3</sub> | $\alpha$ -spin | 13.46                   | 4.75                    | 2.01                    | 0.1172      | 0.0976      | 0.0805      |
|                                                    | $\beta$ -spin  | 18.43                   | 1.71                    | 4.27                    | 0.1088      | 0.0545      | 0.0969      |
| EuR <sub>7</sub> Ph(NO <sub>3</sub> ) <sub>3</sub> | $\alpha$ -spin | 17.17                   | 3.96                    | 0.41                    | 0.1035      | 0.1072      | 0.0544      |
|                                                    | $\beta$ -spin  | 16.53                   | 4.08                    | 0.83                    | 0.0992      | 0.0740      | 0.0221      |
| AmR <sub>8</sub> Ph(NO <sub>3</sub> ) <sub>3</sub> | $\alpha$ -spin | 19.04                   | 3.95                    | 1.68                    | 0.1168      | 0.0986      | 0.0802      |
|                                                    | $\beta$ -spin  | 17.85                   | 0.86                    | 3.80                    | 0.1082      | 0.0554      | 0.0965      |
| EuR <sub>8</sub> Ph(NO <sub>3</sub> ) <sub>3</sub> | $\alpha$ -spin | 16.77                   | 1.83                    | 1.83                    | 0.1030      | 0.1088      | 0.0447      |

$\beta$ -spin      16.18      2.01      0.29      0.0988      0.0760      0.0209

**Table S30** The second-order stabilization energy ( $\Delta E_{ij}^{(2)}$ ) of donor-acceptor interactions and the ON on the  $7s/6s$ ,  $6d/5d$  and  $5f/4f$  orbitals of the Am/Eu for  $MR_nPhR_n(NO_3)_3$  calculated by the PBE0/6-311G\*-

|                                                                   |                | RECP method            |                        |                        |        |        |        |
|-------------------------------------------------------------------|----------------|------------------------|------------------------|------------------------|--------|--------|--------|
|                                                                   |                | $\Delta E_{ij}^{(2)}s$ | $\Delta E_{ij}^{(2)}d$ | $\Delta E_{ij}^{(2)}f$ | ON $s$ | ON $d$ | ON $f$ |
| AmR <sub>1</sub> PhR <sub>1</sub> (NO <sub>3</sub> ) <sub>3</sub> | $\alpha$ -spin | 29.13                  | 10.78                  | 7.54                   | 0.1258 | 0.0936 | 0.0727 |
|                                                                   | $\beta$ -spin  | 27.10                  | 3.31                   | 7.80                   | 0.1181 | 0.0446 | 0.0953 |
| EuR <sub>1</sub> PhR <sub>1</sub> (NO <sub>3</sub> ) <sub>3</sub> | $\alpha$ -spin | 25.20                  | 6.26                   | 0.17                   | 0.1129 | 0.1021 | 0.0511 |
|                                                                   | $\beta$ -spin  | 24.43                  | 3.30                   | 1.92                   | 0.1089 | 0.0736 | 0.0239 |
| AmR <sub>2</sub> PhR <sub>2</sub> (NO <sub>3</sub> ) <sub>3</sub> | $\alpha$ -spin | 26.86                  | 8.38                   | 5.25                   | 0.1241 | 0.0909 | 0.0786 |
|                                                                   | $\beta$ -spin  | 24.98                  | 4.87                   | 5.31                   | 0.1166 | 0.0446 | 0.0918 |
| EuR <sub>2</sub> PhR <sub>2</sub> (NO <sub>3</sub> ) <sub>3</sub> | $\alpha$ -spin | 23.63                  | 8.16                   | 0.08                   | 0.1120 | 0.1001 | 0.0607 |
|                                                                   | $\beta$ -spin  | 22.87                  | 5.62                   | 0.97                   | 0.1080 | 0.0720 | 0.0243 |
| AmR <sub>3</sub> PhR <sub>3</sub> (NO <sub>3</sub> ) <sub>3</sub> | $\alpha$ -spin | 25.43                  | 7.94                   | 4.24                   | 0.1230 | 0.0915 | 0.0816 |
|                                                                   | $\beta$ -spin  | 23.65                  | 3.74                   | 5.05                   | 0.1154 | 0.0441 | 0.0926 |
| EuR <sub>3</sub> PhR <sub>3</sub> (NO <sub>3</sub> ) <sub>3</sub> | $\alpha$ -spin | 22.85                  | 9.42                   | 0.07                   | 0.1108 | 0.1001 | 0.0670 |
|                                                                   | $\beta$ -spin  | 22.12                  | 5.59                   | 0.67                   | 0.1067 | 0.0722 | 0.0242 |
| AmR <sub>4</sub> PhR <sub>4</sub> (NO <sub>3</sub> ) <sub>3</sub> | $\alpha$ -spin | 26.91                  | 8.42                   | 0.34                   | 0.1236 | 0.0963 | 0.0820 |
|                                                                   | $\beta$ -spin  | 24.91                  | 4.78                   | 10.71                  | 0.1157 | 0.0476 | 0.0978 |
| EuR <sub>4</sub> PhR <sub>4</sub> (NO <sub>3</sub> ) <sub>3</sub> | $\alpha$ -spin | 23.59                  | 8.40                   | 0.09                   | 0.1104 | 0.1028 | 0.0856 |
|                                                                   | $\beta$ -spin  | 22.84                  | 6.15                   | 0.90                   | 0.1062 | 0.0739 | 0.0268 |
| AmR <sub>5</sub> PhR <sub>5</sub> (NO <sub>3</sub> ) <sub>3</sub> | $\alpha$ -spin | 27.28                  | 8.42                   | 4.90                   | 0.1248 | 0.0943 | 0.0715 |
|                                                                   | $\beta$ -spin  | 25.57                  | 3.67                   | 4.96                   | 0.1173 | 0.0440 | 0.0956 |
| EuR <sub>5</sub> PhR <sub>5</sub> (NO <sub>3</sub> ) <sub>3</sub> | $\alpha$ -spin | 24.40                  | 6.02                   | 0.12                   | 0.1125 | 0.1037 | 0.0530 |
|                                                                   | $\beta$ -spin  | 23.73                  | 4.32                   | 0.79                   | 0.1085 | 0.0746 | 0.0241 |
| AmR <sub>6</sub> PhR <sub>6</sub> (NO <sub>3</sub> ) <sub>3</sub> | $\alpha$ -spin | 25.88                  | 8.44                   | 0.32                   | 0.1220 | 0.0966 | 0.0779 |
|                                                                   | $\beta$ -spin  | 23.93                  | 3.28                   | 10.00                  | 0.1142 | 0.0471 | 0.0971 |
| EuR <sub>6</sub> PhR <sub>6</sub> (NO <sub>3</sub> ) <sub>3</sub> | $\alpha$ -spin | 22.98                  | 6.24                   | 0.03                   | 0.1090 | 0.1046 | 0.0565 |
|                                                                   | $\beta$ -spin  | 22.34                  | 5.96                   | 0.80                   | 0.1049 | 0.0756 | 0.0239 |
| AmR <sub>7</sub> PhR <sub>7</sub> (NO <sub>3</sub> ) <sub>3</sub> | $\alpha$ -spin | 26.70                  | 7.80                   | 0.29                   | 0.1251 | 0.0937 | 0.0687 |
|                                                                   | $\beta$ -spin  | 24.78                  | 4.14                   | 4.52                   | 0.1175 | 0.0455 | 0.0920 |
| EuR <sub>7</sub> PhR <sub>7</sub> (NO <sub>3</sub> ) <sub>3</sub> | $\alpha$ -spin | 23.57                  | 5.13                   | 0.03                   | 0.1126 | 0.1023 | 0.0546 |
|                                                                   | $\beta$ -spin  | 22.88                  | 4.07                   | 1.06                   | 0.1086 | 0.0737 | 0.0239 |
| AmR <sub>8</sub> PhR <sub>8</sub> (NO <sub>3</sub> ) <sub>3</sub> | $\alpha$ -spin | 25.38                  | 5.86                   | 4.34                   | 0.1228 | 0.0920 | 0.0823 |
|                                                                   | $\beta$ -spin  | 23.59                  | 4.13                   | 5.02                   | 0.1152 | 0.0446 | 0.0934 |
| EuR <sub>8</sub> PhR <sub>8</sub> (NO <sub>3</sub> ) <sub>3</sub> | $\alpha$ -spin | 22.49                  | 4.73                   | 0.01                   | 0.1106 | 0.1009 | 0.0683 |
|                                                                   | $\beta$ -spin  | 21.83                  | 3.98                   | 0.14                   | 0.1065 | 0.0733 | 0.0237 |

**Cartesian coordinates**

X                      Y                      Z  
30

R<sub>1</sub>AmR<sub>1</sub><sup>3+</sup> (PBE0/6-311G\*-RECP)

|    |             |             |             |
|----|-------------|-------------|-------------|
| C  | 3.98950200  | 1.50980600  | 0.66786400  |
| N  | 2.11286300  | 0.47514800  | 0.01553300  |
| C  | 2.95283700  | 0.55181400  | -1.03986600 |
| C  | 4.13810600  | 1.18626900  | -0.69970800 |
| H  | 4.66231600  | 2.01574400  | 1.35141100  |
| H  | 2.40152700  | 1.17900600  | 1.97206600  |
| H  | 2.68185300  | 0.15314200  | -2.01053700 |
| H  | 4.99076500  | 1.39627500  | -1.33149000 |
| N  | 2.80114200  | 1.07485300  | 1.04886200  |
| Am | -0.00004700 | -0.73858500 | 0.00007300  |
| C  | -3.98950000 | 1.50947900  | -0.66824400 |
| N  | -2.11269300 | 0.47533400  | -0.01559700 |
| C  | -2.95258900 | 0.55244100  | 1.03986700  |
| C  | -4.13794700 | 1.18655900  | 0.69948600  |
| H  | -4.66240300 | 2.01500200  | -1.35200800 |
| H  | -2.40155000 | 1.17827100  | -1.97241600 |
| H  | -2.68145900 | 0.15437200  | 2.01075900  |
| H  | -4.99060000 | 1.39665100  | 1.33124300  |
| N  | -2.80108500 | 1.07450700  | -1.04913900 |

R<sub>2,3</sub>AmR<sub>2,3</sub><sup>3+</sup> (PBE0/6-311G\*-RECP)

|    |             |             |             |
|----|-------------|-------------|-------------|
| C  | -3.83547200 | 1.91977000  | 0.57054100  |
| C  | -2.49555800 | 1.56844900  | 0.75242900  |
| H  | -4.42701200 | 2.71874800  | 0.99829300  |
| H  | -5.27783100 | 0.99604000  | -0.66701900 |
| H  | -1.78035300 | 2.07015900  | 1.38984400  |
| N  | -4.32401600 | 1.02383800  | -0.31661400 |
| C  | -3.34623900 | 0.17006300  | -0.65736700 |
| H  | -3.49907900 | -0.64526100 | -1.35262600 |
| N  | -2.20062600 | 0.47924400  | -0.01675900 |
| Am | -0.00003400 | -0.79181800 | 0.00001300  |
| C  | 3.83538200  | 1.92011000  | -0.57024900 |
| C  | 2.49539000  | 1.56885800  | -0.75186300 |
| H  | 4.42678700  | 2.71932700  | -0.99774400 |
| H  | 5.27816300  | 0.99563500  | 0.66631200  |
| H  | 1.78001300  | 2.07094500  | -1.38879700 |
| N  | 4.32422400  | 1.02364300  | 0.31625000  |
| C  | 3.34660300  | 0.16968600  | 0.65683300  |
| H  | 3.49959100  | -0.64603700 | 1.35158200  |
| N  | 2.20075400  | 0.47921000  | 0.01668800  |

R<sub>4</sub>AmR<sub>4</sub><sup>3+</sup> (PBE0/6-311G\*-RECP)

|   |            |            |             |
|---|------------|------------|-------------|
| C | 4.39486000 | 0.66906400 | -0.00001300 |
|---|------------|------------|-------------|

|    |             |             |             |
|----|-------------|-------------|-------------|
| N  | 3.05064100  | -1.08975300 | -0.00000100 |
| C  | 3.10332800  | 1.11798800  | -0.00001300 |
| H  | 5.34500800  | 1.18720500  | -0.00001800 |
| H  | 5.02415600  | -1.37399100 | -0.00000600 |
| H  | 2.74313400  | 2.13892100  | -0.00001800 |
| N  | 4.27703400  | -0.67957200 | -0.00000700 |
| N  | 2.30546200  | -0.01054500 | -0.00000300 |
| Am | 0.00000000  | 0.00010800  | 0.00000600  |
| C  | -4.39476400 | -0.66948200 | -0.00001200 |
| N  | -3.05080000 | 1.08953100  | -0.00000200 |
| C  | -3.10316600 | -1.11821800 | -0.00001500 |
| H  | -5.34483600 | -1.18776000 | -0.00001500 |
| H  | -5.02435600 | 1.37348200  | -0.00000600 |
| H  | -2.74282400 | -2.13909900 | -0.00002000 |
| N  | -4.27713400 | 0.67917200  | -0.00000700 |
| N  | -2.30546400 | 0.01043100  | -0.00000300 |

R<sub>5</sub>AmR<sub>5</sub><sup>3+</sup> (PBE0/6-311G\*-RECP)

|    |             |             |             |
|----|-------------|-------------|-------------|
| C  | 4.38070400  | -1.16640600 | 0.47669700  |
| C  | 3.27421500  | -0.43681100 | 0.98644700  |
| H  | 5.35003800  | -1.37249200 | 0.91427400  |
| H  | 3.18884200  | 0.06742800  | 1.94062600  |
| N  | 2.30292700  | -0.45998500 | 0.08161200  |
| Am | 0.00006000  | 0.74308800  | 0.00018100  |
| N  | 2.85550700  | -1.19787800 | -0.94464800 |
| H  | 2.37477900  | -1.42565000 | -1.81013900 |
| N  | 4.04184900  | -1.62027200 | -0.74788400 |
| C  | -4.38105300 | -1.16580400 | -0.47704500 |
| C  | -3.27491800 | -0.43510200 | -0.98606000 |
| H  | -5.35053000 | -1.37144300 | -0.91452300 |
| H  | -3.19019900 | 0.07063200  | -1.93951400 |
| N  | -2.30324700 | -0.45946400 | -0.08176900 |
| N  | -2.85523300 | -1.19928100 | 0.94361500  |
| H  | -2.37416900 | -1.42801600 | 1.80866800  |
| N  | -4.04153600 | -1.62156600 | 0.74667200  |

R<sub>6</sub>AmR<sub>6</sub><sup>3+</sup> (PBE0/6-311G\*-RECP)

|    |             |             |             |
|----|-------------|-------------|-------------|
| C  | -3.15421500 | 0.93661100  | -0.28257100 |
| H  | -2.93827400 | 1.87413600  | -0.78150400 |
| N  | -3.00126300 | -1.02476400 | 0.68098100  |
| Am | 0.00000000  | -0.00008600 | -0.17767600 |
| C  | -4.24891800 | -0.67696500 | 0.66411000  |
| H  | -5.07220300 | -1.25976800 | 1.05853100  |
| N  | -4.37143900 | 0.55058400  | 0.06826800  |



|   |             |             |             |
|---|-------------|-------------|-------------|
| H | -5.23494600 | 1.06850100  | -0.08269000 |
| N | -2.29225700 | -0.03003600 | 0.10158300  |
| C | 3.15430100  | -0.93652400 | -0.28236000 |
| H | 2.93844400  | -1.87418500 | -0.78107000 |
| N | 3.00116800  | 1.02503300  | 0.68079000  |
| C | 4.24885800  | 0.67735800  | 0.66396800  |
| H | 5.07209100  | 1.26032700  | 1.05825200  |
| N | 4.37149100  | -0.55030100 | 0.06837800  |
| H | 5.23504600  | -1.06816300 | -0.08248600 |
| N | 2.29225100  | 0.03011400  | 0.10160900  |

R<sub>7,8</sub>AmR<sub>7,8</sub><sup>3+</sup>(PBE0/6-311G\*-RECP)

|    |             |             |             |
|----|-------------|-------------|-------------|
| N  | 2.30425100  | 0.11488200  | -0.00043200 |
| Am | -0.00000500 | -0.25621900 | -0.00010900 |
| C  | 3.29814200  | -0.52633000 | 0.67389500  |
| H  | 3.20591400  | -1.35982100 | 1.35961000  |
| N  | 4.43203900  | 0.04535600  | 0.35155500  |
| H  | 5.37191800  | -0.18211800 | 0.67320500  |
| C  | 2.98652700  | 1.09201700  | -0.73587000 |
| N  | 4.25869600  | 1.05453900  | -0.51789800 |
| H  | 2.53210200  | 1.81174200  | -1.40567300 |
| N  | -2.30418500 | 0.11539200  | 0.00007200  |
| C  | -3.29844300 | -0.52725300 | -0.67234500 |
| H  | -3.20650100 | -1.36170000 | -1.35694000 |
| N  | -4.43225300 | 0.04458300  | -0.34996400 |
| H  | -5.37232700 | -0.18367200 | -0.67049000 |
| C  | -2.98615900 | 1.09352100  | 0.73448000  |
| N  | -4.25850100 | 1.05524900  | 0.51769800  |
| H  | -2.53135300 | 1.81468500  | 1.40246900  |

AmPh<sup>3+</sup>(PBE0/6-311G\*-RECP)

|   |             |             |             |
|---|-------------|-------------|-------------|
| C | -1.47912700 | -0.73224300 | 0.00039700  |
| C | -1.48369000 | -3.50226000 | 0.00086900  |
| H | -1.41890300 | -4.58508700 | 0.00122400  |
| C | -1.47905200 | 0.73235200  | 0.00041100  |
| C | -2.71630400 | 1.43136800  | -0.00048200 |
| C | -2.69866600 | 2.84746200  | -0.00028800 |
| C | -1.48263200 | 3.50240100  | 0.00083000  |
| H | -3.63196800 | 3.40463100  | -0.00113000 |
| H | -1.41775200 | 4.58522100  | 0.00110500  |
| N | -0.30528200 | 1.38450800  | 0.00140400  |
| C | -2.71655100 | -1.43082500 | -0.00021500 |
| N | -0.30551200 | -1.38470500 | 0.00100100  |
| C | -2.69952800 | -2.84698500 | -0.00003900 |

|    |             |             |             |
|----|-------------|-------------|-------------|
| H  | -3.63305500 | -3.40376000 | -0.00044300 |
| C  | -3.92426700 | 0.70694800  | -0.00124500 |
| H  | -4.87376500 | 1.23688100  | -0.00189300 |
| C  | -3.92433000 | -0.70609200 | -0.00105100 |
| H  | -4.87388800 | -1.23592600 | -0.00165000 |
| C  | -0.32327300 | -2.73708800 | 0.00137900  |
| H  | 0.64154500  | -3.23856500 | 0.00225000  |
| C  | -0.32245600 | 2.73688400  | 0.00171600  |
| H  | 0.64254700  | 3.23800700  | 0.00282700  |
| Am | 1.83515900  | -0.00012200 | -0.00034500 |

R<sub>1</sub>EuR<sub>1</sub><sup>3+</sup> (PBE0/6-311G\*-RECP)

|    |             |             |             |
|----|-------------|-------------|-------------|
| C  | 4.50914900  | 0.75148700  | -0.32607800 |
| N  | 2.33240700  | 0.27906600  | -0.00722200 |
| C  | 2.64000000  | 1.33103000  | 0.74399200  |
| C  | 3.99640400  | 1.69168900  | 0.59812000  |
| H  | 5.50411500  | 0.63751800  | -0.74071100 |
| H  | 3.56325500  | -0.82406800 | -1.29725600 |
| H  | 1.90603600  | 1.81969400  | 1.37265100  |
| H  | 4.53131000  | 2.50125800  | 1.07680800  |
| N  | 3.51291400  | -0.04903500 | -0.64858000 |
| Eu | -0.00160400 | -0.90163000 | -0.00016800 |
| C  | -4.50516600 | 0.75536900  | 0.32932600  |
| N  | -2.32995000 | 0.27886200  | 0.00750900  |
| C  | -2.63909100 | 1.32719400  | -0.74896800 |
| C  | -3.99432000 | 1.68964700  | -0.60127400 |
| H  | -5.49898400 | 0.64440300  | 0.74742700  |
| H  | -3.55793200 | -0.81505900 | 1.30764200  |
| H  | -1.90652700 | 1.81149000  | -1.38262900 |
| H  | -4.52979600 | 2.49698000  | -1.08300500 |
| N  | -3.50855600 | -0.04432200 | 0.65385900  |

R<sub>2,3</sub>EuR<sub>2,3</sub><sup>3+</sup> (PBE0/6-311G\*-RECP)

|   |             |             |             |
|---|-------------|-------------|-------------|
| C | -3.96891400 | 1.82739300  | 0.18107100  |
| C | -2.59364300 | 1.57348300  | 0.28148300  |
| H | -4.54036700 | 2.73182400  | 0.34449300  |
| H | -5.50968000 | 0.48769800  | -0.35004400 |
| H | -1.82922100 | 2.28776000  | 0.55514400  |
| N | -4.52013800 | 0.65391900  | -0.18834800 |
| C | -3.54455000 | -0.26694300 | -0.30685300 |
| H | -3.74567700 | -1.29103100 | -0.59342500 |
| N | -2.34365100 | 0.26809000  | -0.02431600 |

|    |             |             |             |
|----|-------------|-------------|-------------|
| Eu | -0.01044200 | -0.88309600 | 0.03971200  |
| C  | 4.36034400  | 1.00182200  | 0.62285800  |
| C  | 3.14032800  | 0.46133700  | 1.04979300  |
| H  | 5.24418700  | 1.28924300  | 1.17744600  |
| H  | 4.96285600  | 1.47755600  | -1.34157500 |
| H  | 2.86580500  | 0.22948100  | 2.07017100  |
| N  | 4.24767600  | 1.11842800  | -0.71533700 |
| C  | 3.03207000  | 0.67537000  | -1.08980400 |
| H  | 2.71171700  | 0.66951100  | -2.12335500 |
| N  | 2.32246200  | 0.26217100  | -0.02514500 |

R<sub>4</sub>EuR<sub>4</sub><sup>3+</sup> (PBE0/6-311G\*-RECP)

|    |             |             |             |
|----|-------------|-------------|-------------|
| C  | -4.54431400 | 0.66222100  | -0.09930800 |
| N  | -2.54710800 | 1.54587200  | 0.22379000  |
| C  | -3.54848800 | -0.33361200 | -0.19638100 |
| H  | -5.62301300 | 0.62357800  | -0.19421500 |
| H  | -4.19099000 | 2.71574900  | 0.29967100  |
| H  | -3.69096600 | -1.38755500 | -0.39680400 |
| N  | -3.84790400 | 1.76703900  | 0.15654000  |
| N  | -2.34988400 | 0.26111400  | 0.00919300  |
| Eu | -0.00002700 | -0.91864100 | -0.00117000 |
| C  | 4.54394400  | 0.66243100  | 0.10578200  |
| N  | 2.54792700  | 1.54472700  | -0.22817100 |
| C  | 3.54769700  | -0.33284100 | 0.20421100  |
| H  | 5.62231300  | 0.62414200  | 0.20449200  |
| H  | 4.19217900  | 2.71407700  | -0.30412200 |
| H  | 3.68939000  | -1.38583700 | 0.41009200  |
| N  | 3.84851200  | 1.76609200  | -0.15761900 |
| N  | 2.34984600  | 0.26101400  | -0.00819200 |

R<sub>5</sub>EuR<sub>5</sub><sup>3+</sup> (PBE0/6-311G\*-RECP)

|    |             |             |             |
|----|-------------|-------------|-------------|
| C  | 4.60732400  | 0.82571100  | -0.44611600 |
| C  | 3.47810000  | 0.09425800  | -0.93470400 |
| H  | 5.60064400  | 0.94513600  | -0.86181300 |
| H  | 3.40567300  | -0.49489300 | -1.83994700 |
| N  | 2.47931000  | 0.24530100  | -0.07926100 |
| Eu | 0.00000000  | -0.83342700 | 0.00007200  |
| N  | 3.02766400  | 1.05133900  | 0.88886000  |
| H  | 2.52652700  | 1.37385600  | 1.71148700  |
| N  | 4.24435600  | 1.40474500  | 0.71137900  |
| C  | -4.60722200 | 0.82599800  | 0.44614400  |
| C  | -3.47800000 | 0.09460300  | 0.93481400  |

|   |             |             |             |
|---|-------------|-------------|-------------|
| H | -5.60048100 | 0.94563400  | 0.86192500  |
| H | -3.40548400 | -0.49420600 | 1.84027200  |
| N | -2.47927700 | 0.24535700  | 0.07924000  |
| N | -3.02779300 | 1.05086200  | -0.88923200 |
| H | -2.52678800 | 1.37294100  | -1.71210900 |
| N | -4.24444500 | 1.40439800  | -0.71172800 |

R<sub>6</sub>EuR<sub>6</sub><sup>3+</sup> (PBE0/6-311G\*-RECP)

|    |             |             |             |
|----|-------------|-------------|-------------|
| C  | -3.21325500 | 0.46436300  | -1.05522600 |
| H  | -3.12931400 | 0.20311800  | -2.10288000 |
| N  | -2.80063600 | 0.71384700  | 1.05967100  |
| Eu | 0.00194500  | -0.92960000 | 0.01537500  |
| C  | -4.00696200 | 1.23235200  | 0.79406100  |
| H  | -4.66121700 | 1.69701700  | 1.52244000  |
| N  | -4.27314900 | 1.08200800  | -0.51940300 |
| H  | -5.11525100 | 1.37795100  | -1.00887900 |
| N  | -2.30389700 | 0.23645800  | -0.07518100 |
| C  | 3.52760400  | -0.23706300 | 0.10127800  |
| H  | 3.76654800  | -1.28636100 | 0.22542300  |
| N  | 2.46395500  | 1.62979500  | -0.17454400 |
| C  | 3.77705800  | 1.88824500  | -0.11424800 |
| H  | 4.22275300  | 2.87314200  | -0.19036500 |
| N  | 4.44977600  | 0.73124400  | 0.04668100  |
| H  | 5.45853700  | 0.61558600  | 0.12038200  |
| N  | 2.29663200  | 0.32050400  | -0.03578600 |

R<sub>7,8</sub>EuR<sub>7,8</sub><sup>3+</sup> (PBE0/6-311G\*-RECP)

|    |             |             |             |
|----|-------------|-------------|-------------|
| N  | -2.40645400 | -0.25199800 | -0.00526600 |
| Eu | 0.00004500  | 0.88742200  | -0.00002700 |
| C  | -3.52161300 | 0.06191000  | -0.68347700 |
| H  | -3.66090200 | 0.84696600  | -1.41674800 |
| N  | -4.50753900 | -0.78302200 | -0.30670900 |
| H  | -5.47414800 | -0.81080700 | -0.63209000 |
| C  | -2.80193900 | -1.30094800 | 0.76375200  |
| N  | -4.09567100 | -1.63806100 | 0.58641000  |
| H  | -2.18606000 | -1.84657700 | 1.46711400  |
| N  | 2.40633300  | -0.25201700 | 0.00534900  |
| C  | 3.52086700  | 0.06078400  | 0.68500500  |
| H  | 3.65948800  | 0.84461800  | 1.41972900  |
| N  | 4.50713300  | -0.78347200 | 0.30762000  |
| H  | 5.47345800  | -0.81180500 | 0.63377800  |
| C  | 2.80251500  | -1.29964400 | -0.76526100 |
| N  | 4.09607200  | -1.63694700 | -0.58741700 |

|   |            |             |             |
|---|------------|-------------|-------------|
| H | 2.18721600 | -1.84399800 | -1.47011000 |
|---|------------|-------------|-------------|

EuPh<sup>3+</sup> (PBE0/6-311G\*-RECP)

|    |             |             |             |
|----|-------------|-------------|-------------|
| C  | -1.11054600 | -0.73337900 | -0.00011400 |
| C  | -1.11945900 | -3.50303500 | 0.00004200  |
| H  | -1.05499300 | -4.58582800 | 0.00008900  |
| C  | -1.11027900 | 0.73355700  | -0.00004800 |
| C  | -2.34887800 | 1.43191300  | -0.00006300 |
| C  | -2.33344600 | 2.84792400  | -0.00009700 |
| C  | -1.11811900 | 3.50323100  | -0.00001200 |
| H  | -3.26745200 | 3.40377700  | -0.00010900 |
| H  | -1.05340300 | 4.58600800  | 0.00001700  |
| N  | 0.06218900  | 1.38529800  | 0.00002000  |
| C  | -2.34932800 | -1.43123700 | 0.00006900  |
| N  | 0.06174500  | -1.38557300 | -0.00027300 |
| C  | -2.33451000 | -2.84729300 | 0.00019500  |
| H  | -3.26877500 | -3.40270300 | 0.00039000  |
| C  | -3.55611800 | 0.70759700  | -0.00000800 |
| H  | -4.50586800 | 1.23710000  | -0.00002200 |
| C  | -3.55633700 | -0.70649900 | 0.00008800  |
| H  | -4.50624900 | -1.23571000 | 0.00025800  |
| C  | 0.04095600  | -2.73719800 | -0.00022200 |
| H  | 1.00479000  | -3.24065200 | -0.00053900 |
| Eu | 2.22068200  | -0.00024600 | 0.00003500  |
| C  | 0.04196900  | 2.73699000  | 0.00005600  |
| H  | 1.00602300  | 3.24002000  | 0.00017700  |

The constrained minima of the MR<sub>*i*</sub><sup>3+</sup> complexes (*i* = 1~8) with the M-N-C angle constrained to approximate the M<sup>3+</sup> location observed in the complex M(PhR<sub>*i*</sub>)<sup>3+</sup> calculated by using the PBE0/ZORA/DKH/6-311G(d)-RECP methods and the CPCM solvation model in aqueous phase

AmR<sub>*i*</sub><sup>3+</sup> (PBE0/ZORA, CPCM)

|   |                   |                   |                   |
|---|-------------------|-------------------|-------------------|
| C | -3.59317109053145 | -0.65243220524473 | 0.01646684744366  |
| N | -1.48403740747615 | -0.00696034198305 | -0.06247312863906 |
| C | -2.24641033528238 | 1.11150572297188  | -0.02596798097495 |
| C | -3.58481207263012 | 0.76699084982897  | 0.01654502986641  |
| H | -4.41872163982981 | -1.35875093732072 | 0.03779378833608  |
| H | -1.99758438231406 | -2.01507108325887 | -0.04692987280630 |
| H | -1.78888375798354 | 2.09752384882039  | -0.04403917337942 |
| H | -4.44655238206647 | 1.42468822821407  | 0.03688753886941  |
| N | -2.33713247495571 | -1.05504984899748 | -0.02209287971909 |

Am 0.84987054306972 -0.01388623303048 0.09381283100324

AmR<sub>2,3</sub><sup>3+</sup>(PBE0/ZORA, CPCM)

C 3.90700501329906 0.75843069530366 0.06332286951709  
C 3.76398529036766 -0.64515647561840 -0.08254050621127  
H 4.79614514405424 1.37908162767024 0.12579491957752  
H 2.39183775827272 2.22300333604187 0.23670541894254  
H 4.55592026563123 -1.38626664844743 -0.15491149965493  
N 2.65408102075230 1.24297149509693 0.13397567435533  
C 1.78967420465190 0.22105188468949 0.03274819651278  
H 0.70838236399690 0.33949031120012 0.04239041516474  
N 2.45705158185407 -0.94758762013281 -0.09577913370853  
Am 1.50084825711988 -3.20568744580368 -0.47126174449527

AmR<sub>4</sub><sup>3+</sup>(PBE0/ZORA, CPCM)

C 3.94082638594658 0.40560497019354 -0.65758629004182  
N 2.20013518445051 0.75985313150840 0.65911170845092  
C 3.54487222814445 -0.80496426186625 -0.14098142878190  
H 4.73568532141004 0.68539454131359 -1.33964624769643  
H 3.05319292045398 2.30901285897517 -0.28082868411327  
H 3.94118369029366 -1.80595849088891 -0.28298861567502  
N 3.07712154680431 1.30031987396441 -0.12543261978241  
N 2.47738666733810 -0.50887706721606 0.65880287695786  
Am 1.16395340515835 -2.04474931598388 1.69241023068205

AmR<sub>5</sub><sup>3+</sup>(PBE0/ZORA, CPCM)

C 4.03725471632764 0.80437103827217 -0.01094189706640  
C 3.83887043263716 -0.57083847750175 -0.01908690940001  
H 4.96219030310669 1.36807506895320 -0.05616794330244  
H 4.54351273328927 -1.39769073876806 -0.07212835514721  
N 2.50710732308181 -0.76354693039828 0.05262568041904  
Am 1.45580311558214 -2.79167846656003 -0.04103517478215  
N 1.97140744878683 0.45764494694646 0.10084959220820  
H 0.96661379676865 0.62391016818406 0.17129622606832  
N 2.84228116041980 1.39946134087223 0.06589021100265

AmR<sub>6</sub><sup>3+</sup>(PBE0/ZORA, CPCM)

C 3.47139605151698 0.85449800784518 -0.13451711406874  
H 4.24697109801819 1.54812887497043 -0.45172095172070  
N 2.18167172369846 -0.92541147856962 0.00666077239596  
Am 4.24953104364358 -1.30417081334779 -2.40353629559214  
C 1.81184149613454 -0.06898573371527 0.91618097272392

|   |                  |                   |                   |
|---|------------------|-------------------|-------------------|
| H | 1.00267359539723 | -0.20312680087369 | 1.62696784529646  |
| N | 2.59747094610509 | 1.04465137430826  | 0.85016317613779  |
| H | 2.53195402610229 | 1.86899846351766  | 1.44549710787480  |
| N | 3.20386700938365 | -0.35183836413515 | -0.63680901304735 |

AmR<sub>7,8</sub><sup>3+</sup>(PBE0/ZORA, CPCM)

|    |                  |                   |                   |
|----|------------------|-------------------|-------------------|
| N  | 2.45092742136390 | -0.78597580259769 | -0.08576045498904 |
| Am | 1.41821284716703 | -2.75719779795724 | -0.56194667230387 |
| C  | 1.90933347325795 | 0.37359535675974  | 0.33639930472544  |
| H  | 0.86640136682125 | 0.56372918742583  | 0.57793617211827  |
| N  | 2.88118498944274 | 1.25454997457328  | 0.40074471143091  |
| H  | 2.80283251202967 | 2.23135359968770  | 0.68018810585878  |
| C  | 3.79541719727051 | -0.50505974542936 | -0.25051717978600 |
| N  | 4.06227891410936 | 0.73288309388167  | 0.04165195874826  |
| H  | 4.53488614853758 | -1.22998899634392 | -0.58074358580275 |

EuR<sub>1</sub><sup>3+</sup>(PBE0/ZORA, CPCM)

|    |                   |                   |                   |
|----|-------------------|-------------------|-------------------|
| C  | -3.62847629145701 | -0.67903048134465 | -0.00157530329333 |
| N  | -1.50649078035948 | 0.01879700553171  | 0.00171094870051  |
| C  | -2.22919793753539 | 1.10704822719297  | -0.00011363473861 |
| C  | -3.61995717105975 | 0.76718474985933  | -0.00241788495623 |
| H  | -4.45935312836994 | -1.38130928359064 | -0.00277727709551 |
| H  | -2.01758221260624 | -2.00247569961470 | 0.00181694775997  |
| H  | -1.78456769458923 | 2.09963333180065  | 0.00012088823221  |
| H  | -4.48348177317834 | 1.42718449662674  | -0.00439284075851 |
| N  | -2.38462349332201 | -1.04879344455178 | 0.00085477687256  |
| Eu | 1.06629548247740  | -0.00968090190966 | 0.00677637927694  |

EuR<sub>2,3</sub><sup>3+</sup>(PBE0/ZORA, CPCM)

|    |                  |                   |                   |
|----|------------------|-------------------|-------------------|
| C  | 3.90718875124501 | 0.78727242028326  | 0.07662295586835  |
| C  | 3.75546343146484 | -0.64567403934208 | -0.08232904872979 |
| H  | 4.80319341347548 | 1.40091403400125  | 0.13992449134737  |
| H  | 2.39960539775054 | 2.24137345780459  | 0.24412474381099  |
| H  | 4.55569048138087 | -1.37846136406713 | -0.16898807389434 |
| N  | 2.66967584441732 | 1.26207899949356  | 0.13532614067576  |
| C  | 1.80022854583374 | 0.22239557973804  | 0.02323049381981  |
| H  | 0.71892658183348 | 0.34731900059693  | 0.04024764534575  |
| N  | 2.45895017518433 | -0.94224118611814 | -0.11123670729946 |
| Eu | 1.45600827741435 | -3.31564574239028 | -0.46647803094445 |

EuR<sub>4</sub><sup>3+</sup>(PBE0/ZORA, CPCM)

|    |                  |                   |                   |
|----|------------------|-------------------|-------------------|
| C  | 3.95897095091202 | 0.46464795464079  | -0.68743679528921 |
| N  | 2.22401396217802 | 0.76933522694202  | 0.63304433981839  |
| C  | 3.52608125184958 | -0.79024879844482 | -0.12607127811827 |
| H  | 4.76374332378073 | 0.71170883753470  | -1.37711992862237 |
| H  | 3.09318235364826 | 2.35452124803302  | -0.30952601285800 |
| H  | 3.94161160695484 | -1.78495386863619 | -0.27540953987964 |
| N  | 3.12719434012220 | 1.34208262283526  | -0.15943979030058 |
| N  | 2.48693197516075 | -0.51107809675584 | 0.66433760391976  |
| Eu | 1.01262758539358 | -2.26037888614895 | 1.82048233132991  |

EuR<sub>5</sub><sup>3+</sup>(PBE0/ZORA, CPCM)

|    |                  |                   |                   |
|----|------------------|-------------------|-------------------|
| C  | 4.05373232835110 | 0.86224581219440  | -0.02563052225869 |
| C  | 3.82438143999236 | -0.57130441480317 | 0.00489942626540  |
| H  | 4.98657650207489 | 1.41630198438129  | -0.09759879186389 |
| H  | 4.54493796609702 | -1.38569010473891 | -0.03715466968130 |
| N  | 2.53333388673730 | -0.75607855720358 | 0.09284085481386  |
| Eu | 1.32212299365645 | -3.05297684716317 | -0.10060402361319 |
| N  | 2.01412122459697 | 0.50085489471072  | 0.11582117722206  |
| H  | 0.99961089747706 | 0.65532426365931  | 0.18698020291979  |
| N  | 2.84622379101685 | 1.46103091896310  | 0.05174777619598  |

EuR<sub>6</sub><sup>3+</sup>(PBE0/ZORA, CPCM)

|    |                  |                   |                   |
|----|------------------|-------------------|-------------------|
| C  | 3.44912438793128 | 0.86376216778257  | -0.10652120168374 |
| H  | 4.22488510002869 | 1.55694505919221  | -0.42954832142333 |
| N  | 2.18845988849373 | -0.91517126143023 | -0.00346637512832 |
| Eu | 4.36182608413090 | -1.41185610727431 | -2.57905580075777 |
| C  | 1.80191751849597 | -0.03067559819291 | 0.94999730856293  |
| H  | 0.99169752717065 | -0.18401843454477 | 1.66007047262359  |
| N  | 2.58174002585800 | 1.06538509673782  | 0.88333397685208  |
| H  | 2.51808251846077 | 1.89244790913924  | 1.48180410757784  |
| N  | 3.17964393943001 | -0.37407530140963 | -0.63772766662328 |

EuR<sub>7,8</sub><sup>3+</sup>(PBE0/ZORA, CPCM)

|    |                  |                   |                   |
|----|------------------|-------------------|-------------------|
| N  | 2.46437195571219 | -0.76647666775870 | -0.11237187455551 |
| Eu | 1.31818624779041 | -3.01664585804470 | -0.57319554026785 |
| C  | 1.92888236370098 | 0.38093950010104  | 0.31586858011634  |
| H  | 0.88538690529071 | 0.58708406372382  | 0.55077287606972  |
| N  | 2.93170229694954 | 1.30311423965250  | 0.41872122071466  |
| H  | 2.83984386458765 | 2.27791165906889  | 0.72329186439581  |
| C  | 3.76151414741234 | -0.49782047920910 | -0.25635194250220 |
| N  | 4.06548809894514 | 0.80829726453213  | 0.07736702348155  |
| H  | 4.52609898961102 | -1.19851485206587 | -0.58614984745253 |

AmR<sub>1</sub><sup>3+</sup>(PBE0/DKH, CPCM)

|   |                   |                   |                  |
|---|-------------------|-------------------|------------------|
| C | -3.58900409370430 | -0.64802986600577 | 0.02005738705349 |
|---|-------------------|-------------------|------------------|



|    |                   |                   |                   |
|----|-------------------|-------------------|-------------------|
| N  | -1.47921233349917 | -0.00939317244844 | -0.07374801724114 |
| C  | -2.24625040914606 | 1.11143520965051  | -0.02752642379880 |
| C  | -3.58192225306530 | 0.76457647306811  | 0.01971547889954  |
| H  | -4.41349247942303 | -1.35538849019172 | 0.04029019497944  |
| H  | -1.99473776000154 | -2.01586694164266 | -0.05143636272951 |
| H  | -1.78955688095655 | 2.09816011752649  | -0.04749920278402 |
| H  | -4.44234756834624 | 1.42368345541538  | 0.03928963268573  |
| N  | -2.33071550009076 | -1.05496914871283 | -0.02204118127297 |
| Am | 0.81980427823296  | -0.01564963665908 | 0.10290149420824  |

AmR<sub>2,3</sub><sup>3+</sup>(PBE0/DKH, CPCM)

|    |                  |                   |                   |
|----|------------------|-------------------|-------------------|
| C  | 3.90713045653896 | 0.74738906868988  | 0.05639019424160  |
| C  | 3.76853613179780 | -0.64350312831470 | -0.08868950489742 |
| H  | 4.79463615970611 | 1.36869417269913  | 0.12485717161639  |
| H  | 2.38780284864063 | 2.21378772396742  | 0.23888861154419  |
| H  | 4.55769319946828 | -1.38809194875346 | -0.15149972248837 |
| N  | 2.64828967179564 | 1.23388277627495  | 0.13619536809440  |
| C  | 1.78439938937826 | 0.21799809202169  | 0.03487338617545  |
| H  | 0.70336909882721 | 0.33719902706318  | 0.03661171640783  |
| N  | 2.45377795720830 | -0.94987357037791 | -0.09349342450910 |
| Am | 1.51929598663878 | -3.15815105327018 | -0.46368918618498 |

AmR<sub>4</sub><sup>3+</sup>(PBE0/DKH, CPCM)

|    |                  |                   |                   |
|----|------------------|-------------------|-------------------|
| C  | 3.94053785372285 | 0.40473134902036  | -0.65721807102316 |
| N  | 2.19839856834022 | 0.75990193637814  | 0.65836682200641  |
| C  | 3.54361842487956 | -0.80619991937891 | -0.14173051892900 |
| H  | 4.73678672563653 | 0.68562983839448  | -1.33724109625270 |
| H  | 3.05295171358290 | 2.30859860072068  | -0.27948700352262 |
| H  | 3.94113396453114 | -1.80687975296759 | -0.28405360059118 |
| N  | 3.07654388116253 | 1.29957121602687  | -0.12540882627049 |
| N  | 2.47523184418486 | -0.50978186072551 | 0.65775541191196  |
| Am | 1.16915437395940 | -2.03993516746852 | 1.69187781267077  |

AmR<sub>5</sub><sup>3+</sup>(PBE0/DKH, CPCM)

|    |                  |                   |                   |
|----|------------------|-------------------|-------------------|
| C  | 4.03753333894363 | 0.80410455497513  | -0.00648662722247 |
| C  | 3.83806219012479 | -0.57128831429952 | -0.02455837914210 |
| H  | 4.96241530095912 | 1.36857349063181  | -0.04598670447630 |
| H  | 4.54191193780966 | -1.39874694564600 | -0.08230420629052 |
| N  | 2.50584338029583 | -0.76392031049895 | 0.04210502789515  |
| Am | 1.45867127906880 | -2.79012244617011 | -0.02499508479241 |
| N  | 1.97146820069168 | 0.45761571659023  | 0.09703626122205  |
| H  | 0.96638973100295 | 0.62378687308547  | 0.16535034798537  |
| N  | 2.84274567110354 | 1.39970533133193  | 0.07114079482124  |

AmR<sub>6</sub><sup>3+</sup>(PBE0/DKH, CPCM)

|    |                  |                   |                   |
|----|------------------|-------------------|-------------------|
| C  | 3.47510740019745 | 0.85189085643399  | -0.13199660661203 |
| H  | 4.25100726325080 | 1.54591160085164  | -0.44838164540084 |
| N  | 2.18628339104045 | -0.93107174324036 | 0.01185867207360  |
| Am | 4.23681220465067 | -1.29405131247377 | -2.40590030883341 |
| C  | 1.81280832263653 | -0.07001225485871 | 0.91540555225958  |
| H  | 1.00054363866135 | -0.20134001191250 | 1.62332946662265  |
| N  | 2.59685567021379 | 1.04518857650226  | 0.84794632859808  |
| H  | 2.52614181204441 | 1.87303386512306  | 1.43808595947847  |
| N  | 3.21181728730456 | -0.35680604642562 | -0.63146091818607 |

AmR<sub>7,8</sub><sup>3+</sup>(PBE0/DKH, CPCM)

|    |                  |                   |                   |
|----|------------------|-------------------|-------------------|
| N  | 2.44917589242301 | -0.78619832848955 | -0.08973447327742 |
| Am | 1.42250936847391 | -2.75672350257978 | -0.55659166721919 |
| C  | 1.90862089364629 | 0.37387195180682  | 0.33436493372379  |
| H  | 0.86568896619636 | 0.56574279723554  | 0.57514827746475  |
| N  | 2.88166306514177 | 1.25379589620096  | 0.40174532442466  |
| H  | 2.80346826935160 | 2.23009690705210  | 0.68372231124012  |
| C  | 3.79417655324396 | -0.50483485279398 | -0.25153253925310 |
| N  | 4.06314794732395 | 0.73226354922229  | 0.04373010013604  |
| H  | 4.53302391419914 | -1.23012554765439 | -0.58289990723965 |

EuR<sub>1</sub><sup>3+</sup>(PBE0/DKH, CPCM)

|    |                   |                   |                   |
|----|-------------------|-------------------|-------------------|
| C  | -3.62626039695111 | -0.67855145961887 | -0.00140075759527 |
| N  | -1.50559154062386 | 0.01870852004106  | 0.00200291517124  |
| C  | -2.22838017483626 | 1.10797945451371  | 0.00011203471804  |
| C  | -3.61796398340414 | 0.76730961993539  | -0.00214080589425 |
| H  | -4.45583817633871 | -1.38215156230733 | -0.00265748692943 |
| H  | -2.01434686223587 | -2.00251213242192 | 0.00200898551003  |
| H  | -1.78153372552834 | 2.09978757496160  | 0.00032535003472  |
| H  | -4.48123547337421 | 1.42722420360294  | -0.00410917789646 |
| N  | -2.38182557047151 | -1.04873645025628 | 0.00106184394788  |
| Eu | 1.04554090376404  | -0.01049976845031 | 0.00480009893351  |

EuR<sub>2,3</sub><sup>3+</sup>(PBE0/DKH, CPCM)

|    |                  |                   |                   |
|----|------------------|-------------------|-------------------|
| C  | 3.90767875192985 | 0.78745504421209  | 0.07824674312513  |
| C  | 3.75556918968282 | -0.64501670851972 | -0.08628548927390 |
| H  | 4.80384752676041 | 1.40067146372535  | 0.14519384084812  |
| H  | 2.39984669392982 | 2.24161363635174  | 0.24890861782976  |
| H  | 4.55527482340521 | -1.37826201110491 | -0.17537259005528 |
| N  | 2.66976218617421 | 1.26234291044230  | 0.13692753888647  |
| C  | 1.80005260004258 | 0.22336008625265  | 0.01961560354990  |
| H  | 0.71856532512936 | 0.34828631107013  | 0.03455950753614  |
| N  | 2.45890101666216 | -0.94128674084800 | -0.11789023101469 |
| Eu | 1.45543278628359 | -3.31983283158163 | -0.45345893143166 |

EuR<sub>4</sub><sup>3+</sup>(PBE0/DKH, CPCM)

|    |                  |                   |                   |
|----|------------------|-------------------|-------------------|
| C  | 3.96052166923364 | 0.46569606876066  | -0.68593752301678 |
| N  | 2.22774721530379 | 0.77137975829145  | 0.63813560797169  |
| C  | 3.52796952989833 | -0.78944570320081 | -0.12341802333616 |
| H  | 4.76441370656952 | 0.71160964658353  | -1.37724683800048 |
| H  | 3.08930009308407 | 2.35478892589184  | -0.31552228813472 |
| H  | 3.93894148809944 | -1.78530444474534 | -0.27836566351231 |
| N  | 3.12297292850976 | 1.34217990623269  | -0.16494744068344 |
| N  | 2.48603733874181 | -0.51134883279608 | 0.66307794324172  |
| Eu | 1.01645338055962 | -2.26391908501794 | 1.82708515547048  |

EuR<sub>5</sub><sup>3+</sup>(PBE0/DKH, CPCM)

|    |                  |                   |                   |
|----|------------------|-------------------|-------------------|
| C  | 4.05619286193817 | 0.86210228479250  | -0.00125697610888 |
| C  | 3.82092991905050 | -0.57096703341232 | -0.03032041450741 |
| H  | 4.99251042824361 | 1.41420518004248  | -0.03320671366837 |
| H  | 4.53967250900641 | -1.38566404993921 | -0.09530896625250 |
| N  | 2.52761625067577 | -0.75282665786644 | 0.03135944757099  |
| Eu | 1.32549278559512 | -3.06364899102331 | -0.00792559638276 |
| N  | 2.01345082301679 | 0.50408189746089  | 0.09414267378302  |
| H  | 0.99829178544482 | 0.65935634917239  | 0.15541027639657  |
| N  | 2.85088366702882 | 1.46306897077303  | 0.07840769916934  |

EuR<sub>6</sub><sup>3+</sup>(PBE0/DKH, CPCM)

|    |                  |                   |                   |
|----|------------------|-------------------|-------------------|
| C  | 3.47149627445978 | 0.84075117824697  | -0.14133807900797 |
| H  | 4.24585120574970 | 1.54058180313039  | -0.45011989414597 |
| N  | 2.16984570220391 | -0.93984840149046 | 0.04152245661423  |
| Eu | 4.28068471502059 | -1.29625146272157 | -2.45655120320639 |
| C  | 1.79737126166254 | -0.06405252092401 | 0.92617229893933  |
| H  | 0.98749276319053 | -0.18329266506623 | 1.64012302432878  |
| N  | 2.58570465536714 | 1.04824365257017  | 0.84744808154113  |
| H  | 2.53356784068925 | 1.87296466948000  | 1.44915245101839  |
| N  | 3.22536257165655 | -0.35635272322526 | -0.63752263608152 |

EuR<sub>7,8</sub><sup>3+</sup>(PBE0/DKH, CPCM)

|    |                  |                   |                   |
|----|------------------|-------------------|-------------------|
| N  | 2.46421567984451 | -0.76670994287868 | -0.11224402862674 |
| Eu | 1.31826047854429 | -3.01514422867699 | -0.57349855220273 |
| C  | 1.92883718695779 | 0.38148449246495  | 0.31610192582849  |
| H  | 0.88506431082784 | 0.58731408333433  | 0.55055315624944  |
| N  | 2.93162380889641 | 1.30287543467212  | 0.41881061009446  |
| H  | 2.84000627386675 | 2.27787308837027  | 0.72335787804706  |
| C  | 3.76150394706992 | -0.49813696406604 | -0.25651456436947 |
| N  | 4.06592774008732 | 0.80764637276952  | 0.07725141445822  |
| H  | 4.52603544390515 | -1.19931346598949 | -0.58586547947874 |

AmR<sub>1</sub><sup>3+</sup>(PBE0/6-311G\*-RECP, CPCM)

|    |             |             |             |
|----|-------------|-------------|-------------|
| C  | -3.61591100 | -0.63360000 | 0.00000200  |
| N  | -1.49073900 | -0.01058200 | -0.00000200 |
| C  | -2.24653400 | 1.09067100  | 0.00000000  |
| C  | -3.60008300 | 0.74912300  | 0.00000000  |
| H  | -4.42730700 | -1.34474300 | 0.00000300  |
| H  | -1.99461600 | -1.98846500 | -0.00000200 |
| H  | -1.78311900 | 2.06670000  | 0.00000000  |
| H  | -4.45142000 | 1.41050600  | 0.00000000  |
| N  | -2.34097800 | -1.04235900 | -0.00000100 |
| Am | 1.01319600  | -0.00011100 | 0.00000000  |

AmR<sub>2,3</sub><sup>3+</sup>(PBE0/6-311G\*-RECP, CPCM)

|    |             |             |             |
|----|-------------|-------------|-------------|
| C  | -3.57248800 | 0.71763000  | 0.00000100  |
| C  | -2.26924100 | 1.11295000  | -0.00000100 |
| H  | -4.49575000 | 1.27262200  | 0.00000300  |
| H  | -4.34817300 | -1.26263000 | 0.00000300  |
| H  | -1.85990700 | 2.11101500  | -0.00000200 |
| N  | -3.54511900 | -0.65342000 | 0.00000100  |
| C  | -2.26992700 | -1.05587600 | -0.00000100 |
| H  | -1.96505800 | -2.09048900 | -0.00000200 |
| N  | -1.46504300 | -0.00552500 | -0.00000200 |
| Am | 1.01484200  | -0.00069600 | 0.00000000  |

AmR<sub>4</sub><sup>3+</sup>(PBE0/6-311G\*-RECP, CPCM)

|   |            |             |             |
|---|------------|-------------|-------------|
| C | 3.59919000 | 0.67373100  | 0.00000200  |
| N | 2.25106800 | -1.08504700 | -0.00000200 |
| C | 2.29749700 | 1.10110500  | -0.00000200 |
| H | 4.54564900 | 1.18736100  | 0.00000500  |
| H | 4.24386700 | -1.35036800 | 0.00000300  |
| H | 1.88764500 | 2.09791500  | -0.00000300 |

|    |             |             |             |
|----|-------------|-------------|-------------|
| N  | 3.49797000  | -0.66978000 | 0.00000100  |
| N  | 1.51889300  | -0.00918200 | -0.00000200 |
| Am | -1.02034500 | -0.00248300 | 0.00000000  |

AmR<sub>5</sub><sup>3+</sup>(PBE0/6-311G\*-RECP, CPCM)

|    |             |             |             |
|----|-------------|-------------|-------------|
| C  | -3.64901900 | 0.64914600  | -0.00001900 |
| C  | -2.32475700 | 1.08432000  | 0.00001800  |
| H  | -4.56666700 | 1.21500900  | -0.00003300 |
| H  | -1.90391900 | 2.07734000  | 0.00003400  |
| N  | -1.55091800 | -0.00179600 | -0.00000500 |
| Am | 1.02785800  | 0.00185100  | 0.00000000  |
| N  | -2.39738000 | -1.01407500 | 0.00000300  |
| H  | -2.08975600 | -1.97489500 | 0.00000800  |
| N  | -3.65791600 | -0.68328000 | 0.00000800  |

AmR<sub>6</sub><sup>3+</sup>(PBE0/6-311G\*-RECP, CPCM)

|    |             |             |             |
|----|-------------|-------------|-------------|
| C  | 2.27381200  | 1.04359000  | -0.00005600 |
| H  | 1.95594300  | 2.07406200  | -0.00005100 |
| N  | 2.27549700  | -1.14009400 | -0.00002800 |
| Am | -1.01820200 | -0.00180800 | 0.00000600  |
| C  | 3.50988400  | -0.72418100 | 0.00002000  |
| H  | 4.38581500  | -1.35295600 | 0.00010100  |
| N  | 3.55262200  | 0.63374600  | 0.00005900  |
| H  | 4.37655700  | 1.21584800  | 0.00015000  |
| N  | 1.50169000  | -0.01960500 | -0.00010800 |

AmR<sub>7,8</sub><sup>3+</sup>(PBE0/6-311G\*-RECP, CPCM)

|    |             |             |             |
|----|-------------|-------------|-------------|
| N  | 1.50583000  | -0.02153800 | -0.00001200 |
| Am | -1.02416900 | -0.00263600 | 0.00000100  |
| C  | 2.34572900  | -1.04838400 | -0.00000700 |
| H  | 2.08761000  | -2.09566600 | -0.00001100 |
| N  | 3.58409000  | -0.57473400 | 0.00000700  |
| H  | 4.44797200  | -1.09508300 | 0.00001800  |
| C  | 2.32127500  | 1.07134700  | -0.00000500 |
| N  | 3.59552900  | 0.76982600  | 0.00000600  |
| H  | 1.96027500  | 2.08854200  | -0.00000900 |

EuR<sub>1</sub><sup>3+</sup>(PBE0/6-311G\*-RECP, CPCM)

|    |             |             |             |
|----|-------------|-------------|-------------|
| C  | -3.36193800 | -0.64655900 | -0.00009400 |
| N  | -1.23285500 | 0.00051800  | -0.00000100 |
| C  | -1.97477900 | 1.09345100  | -0.00009500 |
| C  | -3.34129300 | 0.76216400  | 0.00012000  |
| H  | -4.18392400 | -1.34543400 | -0.00014600 |
| H  | -1.75275400 | -1.98974000 | 0.00007800  |
| H  | -1.51391900 | 2.06995400  | -0.00014600 |
| H  | -4.19159000 | 1.42498200  | 0.00020500  |
| N  | -2.10268900 | -1.04289600 | 0.00004400  |
| Eu | 1.38189000  | -0.00186400 | 0.00000200  |

EuR<sub>2,3</sub><sup>3+</sup>(PBE0/6-311G\*-RECP, CPCM)

|    |             |             |             |
|----|-------------|-------------|-------------|
| C  | -3.30357900 | 0.71037600  | 0.00451900  |
| C  | -1.96222100 | 1.10119200  | 0.00186200  |
| H  | -4.21594500 | 1.28428400  | -0.00245200 |
| H  | -4.09343400 | -1.24733300 | 0.00207600  |
| H  | -1.56242300 | 2.10340800  | -0.00983200 |
| N  | -3.28526400 | -0.64147500 | -0.00104500 |
| C  | -2.00114600 | -1.04770800 | -0.00108500 |
| H  | -1.70496000 | -2.08520700 | 0.00792000  |
| N  | -1.17867600 | 0.00243100  | -0.00566500 |
| Eu | 1.37184200  | -0.00261900 | 0.00027800  |

EuR<sub>4</sub><sup>3+</sup>(PBE0/6-311G\*-RECP, CPCM)

|    |             |             |             |
|----|-------------|-------------|-------------|
| C  | 3.25180700  | 0.67264200  | -0.00000300 |
| N  | 1.90652700  | -1.08456100 | 0.00000300  |
| C  | 1.93910300  | 1.10017200  | 0.00000300  |
| H  | 4.19459200  | 1.19359900  | -0.00000800 |
| H  | 3.90055400  | -1.34779600 | -0.00000600 |
| H  | 1.53238600  | 2.09842700  | 0.00000200  |
| N  | 3.15262800  | -0.66792300 | -0.00000300 |
| N  | 1.16746500  | -0.00540900 | 0.00000600  |
| Eu | -1.33903700 | -0.00437900 | -0.00000100 |

EuR<sub>5</sub><sup>3+</sup>(PBE0/6-311G\*-RECP, CPCM)

|    |             |             |             |
|----|-------------|-------------|-------------|
| C  | -3.25618500 | 0.64743400  | 0.00000300  |
| C  | -1.93577600 | 1.08836200  | -0.00000300 |
| H  | -4.17503400 | 1.21081800  | 0.00000800  |
| H  | -1.51717500 | 2.08228400  | -0.00000400 |
| N  | -1.16247100 | 0.00129200  | -0.00000700 |
| Eu | 1.32567800  | 0.00296500  | 0.00000100  |
| N  | -2.00333000 | -1.01839100 | -0.00000200 |
| H  | -1.69344800 | -1.97905300 | -0.00000200 |
| N  | -3.25995600 | -0.68513400 | 0.00000300  |

EuR<sub>6</sub><sup>3+</sup>(PBE0/6-311G\*-RECP, CPCM)

|    |             |             |             |
|----|-------------|-------------|-------------|
| C  | 1.90215600  | 1.05017500  | 0.00012700  |
| H  | 1.58692200  | 2.08120600  | 0.00011600  |
| N  | 1.88152200  | -1.13088900 | 0.00009700  |
| Eu | -1.31786000 | -0.00265900 | -0.00002900 |
| C  | 3.12282900  | -0.73221600 | -0.00011700 |
| H  | 3.99156100  | -1.37012100 | -0.00031600 |
| N  | 3.17349100  | 0.62541300  | -0.00013500 |
| H  | 4.00239100  | 1.20194300  | -0.00049300 |
| N  | 1.12990600  | -0.01642100 | 0.00039000  |

EuR<sub>7,8</sub><sup>3+</sup>(PBE0/6-311G\*-RECP, CPCM)

|    |             |             |             |
|----|-------------|-------------|-------------|
| N  | 1.12256300  | -0.01723900 | -0.00003600 |
| Eu | -1.32291000 | -0.00425600 | -0.00000200 |
| C  | 1.95801500  | -1.05174400 | -0.00003000 |
| H  | 1.69446900  | -2.09754700 | 0.00009300  |
| N  | 3.19248500  | -0.57791800 | 0.00002600  |
| H  | 4.05705400  | -1.09808500 | 0.00033000  |
| C  | 1.93670200  | 1.07883000  | 0.00015500  |
| N  | 3.20600200  | 0.76737400  | -0.00016400 |
| H  | 1.57616300  | 2.09574500  | 0.00016700  |

AmR<sub>1</sub>Ph<sup>3+</sup> (PBE0/6-311G\*-RECP)

|   |             |             |             |
|---|-------------|-------------|-------------|
| C | 2.22681600  | 0.20808500  | 0.06889800  |
| C | 4.02345900  | -1.85675300 | 0.32459900  |
| H | 4.68662900  | -2.70737000 | 0.43611800  |
| C | 1.27079800  | 1.29164800  | -0.01918900 |
| C | 1.72982000  | 2.63388700  | -0.11509700 |
| C | 0.75016200  | 3.65871000  | -0.14220400 |
| C | -0.58099000 | 3.33557200  | -0.05543200 |
| H | 1.05860600  | 4.69738500  | -0.21956500 |
| H | -1.33587300 | 4.11279200  | -0.05700400 |
| N | -0.03426700 | 0.98795300  | 0.02860500  |
| C | 3.60686800  | 0.50070400  | 0.05332800  |
| C | -0.95446200 | 1.98401700  | 0.02681700  |
| C | -3.51484000 | 2.30700500  | 0.16053400  |
| C | -4.52513500 | 1.37014200  | 0.26430700  |
| H | -3.64288900 | 3.37837700  | 0.12134900  |
| H | -4.42102900 | -0.72244600 | 0.37880200  |
| H | -5.59902400 | 1.48140400  | 0.33466800  |
| C | -2.33454900 | 1.55765100  | 0.12045200  |
| N | -2.60920300 | 0.22501800  | 0.19553500  |
| N | 1.75401400  | -1.05118000 | 0.18991500  |

|    |             |             |             |
|----|-------------|-------------|-------------|
| C  | 4.51444900  | -0.57318400 | 0.17862300  |
| H  | 5.58486100  | -0.38746400 | 0.16878500  |
| N  | -3.94172600 | 0.16259700  | 0.27607300  |
| C  | 3.11323000  | 2.89227000  | -0.14500100 |
| H  | 3.46745300  | 3.91651100  | -0.21456600 |
| C  | 4.03204100  | 1.85170400  | -0.06615500 |
| H  | 5.09533900  | 2.07378200  | -0.08152900 |
| C  | 2.64473600  | -2.04985400 | 0.32583200  |
| H  | 2.24655900  | -3.05502500 | 0.44065400  |
| Am | -0.72986100 | -1.36556100 | -0.12653100 |

AmR<sub>2</sub>Ph<sup>3+</sup> (PBE0/6-311G\*-RECP)

|    |             |             |             |
|----|-------------|-------------|-------------|
| C  | 1.26677400  | 1.30834500  | 0.01114900  |
| C  | -0.95817300 | 1.99530400  | -0.02616700 |
| C  | -0.58272900 | 3.35492100  | 0.02341700  |
| H  | -1.33761800 | 4.13246000  | 0.02371200  |
| C  | 2.22993900  | 0.22891900  | -0.04174400 |
| C  | 3.60655400  | 0.52924800  | -0.02872000 |
| C  | 4.52033300  | -0.54120900 | -0.10163800 |
| C  | 4.03891300  | -1.83377400 | -0.19313400 |
| H  | 5.58936600  | -0.34834100 | -0.09229500 |
| H  | 4.70853600  | -2.68405300 | -0.25845700 |
| N  | 1.76580400  | -1.03776400 | -0.11518500 |
| C  | 1.72539500  | 2.65737000  | 0.07531600  |
| C  | -2.32476200 | 1.56521700  | -0.07344500 |
| C  | -3.50284000 | 2.29992400  | -0.11349600 |
| H  | -3.69766000 | 3.36286500  | -0.11796200 |
| H  | -5.48975700 | 1.59884800  | -0.19243900 |
| H  | -4.56447100 | -0.74785600 | -0.16523100 |
| N  | -2.64263100 | 0.21356100  | -0.08677200 |
| N  | -0.03690800 | 0.99744500  | -0.02857100 |
| C  | 0.74323700  | 3.68183800  | 0.08497900  |
| H  | 1.05191100  | 4.72185700  | 0.13480900  |
| C  | -3.96056800 | 0.14927700  | -0.13370400 |
| N  | -4.49765000 | 1.38896400  | -0.14967800 |
| C  | 3.10514700  | 2.92337700  | 0.09854600  |
| H  | 3.45251900  | 3.95105800  | 0.14334300  |
| C  | 4.02604500  | 1.88869700  | 0.05206400  |
| H  | 5.08864100  | 2.11328800  | 0.07076300  |
| C  | 2.66123200  | -2.03486500 | -0.20086900 |
| H  | 2.27000000  | -3.04657000 | -0.27714300 |
| Am | -0.72377600 | -1.40025800 | 0.07154800  |

AmR<sub>3</sub>Ph<sup>3+</sup> (PBE0/6-311G\*-RECP)

|   |            |            |            |
|---|------------|------------|------------|
| C | 1.26206500 | 1.30631500 | 0.01284100 |
|---|------------|------------|------------|



|    |             |             |             |
|----|-------------|-------------|-------------|
| C  | -0.95772000 | 1.99826700  | -0.02443800 |
| C  | -0.58642400 | 3.35515500  | 0.03356300  |
| H  | -1.33136600 | 4.14289100  | 0.03702600  |
| C  | 2.22276800  | 0.22532000  | -0.04449700 |
| C  | 3.59812300  | 0.52633900  | -0.03154600 |
| C  | 4.51200800  | -0.54392700 | -0.11335700 |
| C  | 4.03067400  | -1.83444600 | -0.21265700 |
| H  | 5.58096600  | -0.35093500 | -0.10451100 |
| H  | 4.69989500  | -2.68444900 | -0.28557200 |
| N  | 1.75699500  | -1.04171900 | -0.12611300 |
| C  | 1.72341600  | 2.65670500  | 0.07999400  |
| C  | -2.31278200 | 1.53782000  | -0.08650800 |
| H  | -3.52791900 | 3.28405500  | -0.11002400 |
| H  | -5.53382700 | 1.78770300  | -0.20784000 |
| H  | -4.52673100 | -0.78045900 | -0.20821700 |
| N  | -2.63198500 | 0.22424200  | -0.11869900 |
| N  | -0.03869300 | 0.99865600  | -0.02539100 |
| C  | 0.74384700  | 3.67918700  | 0.09587400  |
| H  | 1.05229400  | 4.71910500  | 0.14959900  |
| C  | -3.97927000 | 0.15081700  | -0.16194200 |
| C  | -4.51047000 | 1.43989700  | -0.16381800 |
| N  | -3.45330800 | 2.27381700  | -0.11679700 |
| C  | 3.10562600  | 2.92143000  | 0.10564100  |
| C  | 4.01967600  | 1.88721500  | 0.05402000  |
| H  | 3.45394900  | 3.94836300  | 0.15653300  |
| H  | 5.08316700  | 2.10776200  | 0.07048400  |
| C  | 2.65173900  | -2.03659000 | -0.21773600 |
| H  | 2.26183300  | -3.04854900 | -0.29778400 |
| Am | -0.73455800 | -1.40976300 | 0.07954400  |

AmR<sub>4</sub>Ph<sup>3+</sup> (PBE0/6-311G\*-RECP)

|   |             |             |             |
|---|-------------|-------------|-------------|
| C | 2.21592600  | 0.18575500  | 0.05147800  |
| C | 3.95456400  | -1.93805100 | 0.24884400  |
| H | 4.59340400  | -2.80991300 | 0.33583900  |
| C | 1.29081000  | 1.29544500  | -0.01629100 |
| C | 1.78941400  | 2.62323300  | -0.09657700 |
| C | 0.84443300  | 3.67818000  | -0.09861200 |
| C | -0.49769700 | 3.39540100  | -0.01257500 |
| H | 1.18489500  | 4.70794200  | -0.15953400 |
| H | -1.22873100 | 4.19586100  | -0.00030300 |
| N | -0.02402500 | 1.02751300  | 0.03500100  |
| C | 3.60445300  | 0.43718100  | 0.03003600  |
| C | -0.90810300 | 2.05628400  | 0.04126700  |
| H | -3.81738800 | 3.31531900  | 0.16475400  |

|    |             |             |             |
|----|-------------|-------------|-------------|
| H  | -5.41607000 | 1.32270000  | 0.23393600  |
| C  | -2.29203200 | 1.63761200  | 0.10096700  |
| N  | -2.55669800 | 0.29553300  | 0.11328700  |
| N  | 1.70909900  | -1.06264900 | 0.15269400  |
| C  | 4.48074300  | -0.66657600 | 0.12394100  |
| H  | 5.55604000  | -0.51181400 | 0.10799500  |
| N  | -3.83304300 | 0.08017400  | 0.16378300  |
| N  | -4.40188000 | 1.26586400  | 0.18611900  |
| C  | -3.51628600 | 2.27750000  | 0.15174400  |
| C  | 4.07008100  | 1.77510000  | -0.07616200 |
| H  | 5.13928200  | 1.96476200  | -0.10452600 |
| C  | 3.18251200  | 2.84156900  | -0.13037900 |
| H  | 3.56508100  | 3.85653000  | -0.18401300 |
| C  | 2.57106200  | -2.08955300 | 0.26692600  |
| H  | 2.14507500  | -3.08421500 | 0.37741600  |
| Am | -0.76542200 | -1.36059700 | -0.09300400 |

AmR<sub>5</sub>Ph<sup>3+</sup> (PBE0/6-311G\*-RECP)

|   |             |             |             |
|---|-------------|-------------|-------------|
| C | -1.26717400 | 1.30569800  | -0.01551200 |
| C | 0.95403400  | 1.99795700  | 0.02037600  |
| C | 0.58664000  | 3.35113800  | -0.04567600 |
| H | 1.34405700  | 4.12640300  | -0.04815900 |
| C | -2.23227100 | 0.22179400  | 0.05388000  |
| C | -3.61249600 | 0.52188200  | 0.04065000  |
| C | -4.52958600 | -0.54756200 | 0.13718400  |
| C | -4.04715400 | -1.83781200 | 0.25265200  |
| H | -5.59864700 | -0.35356000 | 0.12783700  |
| H | -4.71549400 | -2.68743800 | 0.33932800  |
| N | -1.77029400 | -1.04033600 | 0.14819200  |
| C | -1.72334700 | 2.65226500  | -0.09398000 |
| C | 2.33598400  | 1.57874400  | 0.09172400  |
| H | 3.73077200  | 3.36834800  | 0.12136700  |
| N | 2.65341400  | 0.26200900  | 0.14130900  |
| N | 0.03485100  | 0.99827900  | 0.02475000  |
| C | -0.74480000 | 3.67823100  | -0.11573900 |
| H | -1.05297200 | 4.71806600  | -0.17909100 |
| N | 4.53992900  | 1.43940800  | 0.21101100  |
| C | 3.53724700  | 2.30510000  | 0.13612300  |
| C | -3.10355400 | 2.91637700  | -0.11891900 |
| H | -3.45556600 | 3.94254100  | -0.17490600 |
| C | -4.03131400 | 1.87412800  | -0.05668800 |
| H | -5.09338700 | 2.10333600  | -0.07334800 |
| N | 3.97354500  | 0.27022900  | 0.20758700  |
| H | 4.53809600  | -0.57009400 | 0.27318800  |

|    |             |             |             |
|----|-------------|-------------|-------------|
| C  | -2.66982000 | -2.03673300 | 0.25638100  |
| H  | -2.27787300 | -3.04653600 | 0.34977000  |
| Am | 0.73522700  | -1.39995200 | -0.09600700 |

AmR<sub>6</sub>Ph<sup>3+</sup> (PBE0/6-311G\*-RECP)

|    |             |             |             |
|----|-------------|-------------|-------------|
| C  | -1.30501300 | 1.27796900  | -0.01934800 |
| C  | 0.87896000  | 2.07278300  | 0.05145300  |
| C  | 0.45432700  | 3.40070000  | 0.00040100  |
| H  | 1.16518000  | 4.21936900  | 0.02184600  |
| C  | -2.20213800 | 0.15371800  | 0.04798300  |
| C  | -3.59313000 | 0.37546900  | 0.02522900  |
| C  | -4.44127200 | -0.75081300 | 0.12380400  |
| C  | -3.88560000 | -2.00785500 | 0.25517200  |
| H  | -5.52009600 | -0.62310800 | 0.10760100  |
| H  | -4.50417700 | -2.89371100 | 0.34748100  |
| N  | -1.66189200 | -1.08453500 | 0.15615200  |
| C  | -1.82590700 | 2.59652700  | -0.09784000 |
| C  | 2.25600700  | 1.61269400  | 0.11820800  |
| H  | 3.65608900  | 3.21394400  | 0.14638300  |
| H  | 5.45641000  | 1.39595100  | 0.20870700  |
| N  | 2.48248000  | 0.30188200  | 0.14322500  |
| N  | 0.01352500  | 1.03209100  | 0.03438800  |
| C  | -0.89944700 | 3.66080300  | -0.09264400 |
| H  | -1.25276800 | 4.68642600  | -0.15116400 |
| N  | 3.80427300  | 0.05340200  | 0.16947200  |
| C  | 4.38838600  | 1.22410100  | 0.17623700  |
| N  | 3.45331200  | 2.22065000  | 0.14651800  |
| C  | -4.08770300 | 1.70667200  | -0.08378600 |
| H  | -5.16102400 | 1.86996600  | -0.11241900 |
| C  | -3.23031700 | 2.78593100  | -0.13612300 |
| H  | -3.63156800 | 3.79340300  | -0.18929100 |
| C  | -2.49784500 | -2.13041700 | 0.27650700  |
| H  | -2.05117800 | -3.11530000 | 0.39661900  |
| Am | 0.79100400  | -1.32716900 | -0.09679500 |

AmR<sub>7</sub>Ph<sup>3+</sup> (PBE0/6-311G\*-RECP)

|   |             |            |             |
|---|-------------|------------|-------------|
| C | -1.26666800 | 1.30063000 | 0.01562000  |
| C | 0.95067100  | 1.98248500 | -0.02902000 |
| C | 0.60292600  | 3.33826900 | 0.02828100  |
| H | 1.38124200  | 4.09353900 | 0.02137800  |
| C | -2.23036500 | 0.22129900 | -0.05088400 |
| C | -3.60983600 | 0.52317400 | -0.03185900 |

|    |             |             |             |
|----|-------------|-------------|-------------|
| C  | -4.52624500 | -0.54777000 | -0.12353700 |
| C  | -4.04377400 | -1.83745400 | -0.24180800 |
| H  | -5.59537900 | -0.35477400 | -0.10948000 |
| H  | -4.71243100 | -2.68699100 | -0.32565600 |
| N  | -1.76646500 | -1.04144800 | -0.14773200 |
| C  | -1.71211100 | 2.64753800  | 0.09380300  |
| C  | 2.32709800  | 1.53439300  | -0.09127700 |
| N  | 2.65871300  | 0.19785000  | -0.11541300 |
| N  | 0.03627800  | 0.98612800  | -0.03032700 |
| C  | -0.72869600 | 3.66993800  | 0.10466200  |
| H  | -1.03272400 | 4.71110700  | 0.16567000  |
| C  | 3.98862800  | 0.21861100  | -0.17849000 |
| H  | 4.66213700  | -0.62700800 | -0.22130100 |
| C  | -3.09494300 | 2.91463300  | 0.12269900  |
| H  | -3.44333800 | 3.94212600  | 0.17473200  |
| C  | -4.02419200 | 1.87660800  | 0.06730000  |
| H  | -5.08546600 | 2.10812800  | 0.08987000  |
| N  | 3.36755100  | 2.33292100  | -0.13511100 |
| N  | 4.39101600  | 1.49134400  | -0.19053000 |
| H  | 5.33985500  | 1.85101700  | -0.24102500 |
| C  | -2.66630000 | -2.03724600 | -0.25492200 |
| H  | -2.27537100 | -3.04684700 | -0.35535000 |
| Am | 0.73847000  | -1.39566900 | 0.09001600  |

AmR<sub>8</sub>Ph<sup>3+</sup> (PBE0/6-311G\*-RECP)

|   |             |             |             |
|---|-------------|-------------|-------------|
| C | -1.27396900 | 1.29126300  | -0.01782600 |
| C | 0.93838900  | 2.00633200  | 0.03690100  |
| C | 0.56076000  | 3.35157700  | -0.03399500 |
| H | 1.30041200  | 4.14455700  | -0.03079000 |
| C | -2.21608800 | 0.19845200  | 0.05928200  |
| C | -3.59946100 | 0.47516500  | 0.03853300  |
| C | -4.49423900 | -0.61349300 | 0.14793500  |
| C | -3.98796300 | -1.89126300 | 0.28615500  |
| H | -5.56699700 | -0.44157700 | 0.13333300  |
| H | -4.64077600 | -2.75142900 | 0.38609200  |
| N | -1.72723300 | -1.05646000 | 0.17271000  |
| C | -1.74511600 | 2.62800700  | -0.10897900 |
| C | 2.30619100  | 1.53149600  | 0.11364500  |
| H | 3.63020400  | 3.20484400  | 0.18884400  |
| N | 2.60185700  | 0.21739700  | 0.13574600  |
| N | 0.03454200  | 0.99947200  | 0.03619500  |
| C | -0.77910000 | 3.66072300  | -0.12275900 |
| H | -1.09582000 | 4.69752000  | -0.19355700 |
| N | 3.45781800  | 2.20523800  | 0.17511900  |

|    |             |             |             |
|----|-------------|-------------|-------------|
| C  | 3.96425600  | 0.18718100  | 0.20548200  |
| H  | 4.56622000  | -0.71042000 | 0.24593400  |
| N  | 4.50118000  | 1.38624800  | 0.23617900  |
| C  | -3.13659700 | 2.87123200  | -0.14331700 |
| H  | -3.50155900 | 3.89222800  | -0.20507900 |
| C  | -4.04079200 | 1.82092400  | -0.07738100 |
| H  | -5.10669300 | 2.02926200  | -0.10188100 |
| C  | -2.60640900 | -2.06723800 | 0.29992900  |
| H  | -2.19765700 | -3.06808600 | 0.41816500  |
| Am | 0.74943500  | -1.36802400 | -0.10773000 |

EuR<sub>1</sub>Ph<sup>3+</sup> (PBE0/6-311G\*-RECP)

|    |             |             |             |
|----|-------------|-------------|-------------|
| C  | 2.13180000  | 0.13211600  | 0.00035500  |
| C  | 4.10699600  | -1.78523800 | 0.00110900  |
| H  | 4.84001100  | -2.58429000 | 0.00137500  |
| C  | 1.08128800  | 1.15212500  | -0.00000100 |
| C  | 1.44726200  | 2.53716000  | -0.00037700 |
| C  | 0.39997300  | 3.49620000  | -0.00075700 |
| C  | -0.90105500 | 3.07552600  | -0.00071500 |
| H  | 0.63925000  | 4.55565000  | -0.00131300 |
| H  | -1.71025500 | 3.79542000  | -0.00107500 |
| N  | -0.18887400 | 0.75790400  | 0.00010500  |
| C  | 3.48518600  | 0.53751500  | 0.00039500  |
| C  | -1.17793600 | 1.69301700  | -0.00010300 |
| C  | -3.74258500 | 1.91911700  | 0.00048600  |
| C  | -4.72719300 | 0.95593700  | 0.00110600  |
| H  | -3.90053900 | 2.98700100  | 0.00001700  |
| H  | -4.55811700 | -1.13734500 | 0.00220000  |
| H  | -5.80611900 | 1.03097600  | 0.00133300  |
| C  | -2.53321000 | 1.19844700  | 0.00040900  |
| N  | -2.77515800 | -0.13977400 | 0.00127500  |
| N  | 1.77272600  | -1.16139100 | 0.00074500  |
| C  | 4.48561500  | -0.45603100 | 0.00072900  |
| H  | 5.53536600  | -0.17627800 | 0.00073300  |
| N  | -4.10095900 | -0.23445900 | 0.00143900  |
| C  | 2.79694500  | 2.89942400  | -0.00038800 |
| H  | 3.07605400  | 3.94929500  | -0.00067300 |
| C  | 3.80132800  | 1.92160400  | 0.00000300  |
| H  | 4.84352600  | 2.23000300  | 0.00000600  |
| C  | 2.74840100  | -2.08708500 | 0.00113800  |
| H  | 2.43596000  | -3.12817600 | 0.00155300  |
| Eu | -0.77406600 | -1.73360700 | -0.00078500 |

EuR<sub>2</sub>Ph<sup>3+</sup> (PBE0/6-311G\*-RECP)

|   |            |            |            |
|---|------------|------------|------------|
| C | 1.07208700 | 1.15753500 | 0.00002100 |
|---|------------|------------|------------|

|    |             |             |             |
|----|-------------|-------------|-------------|
| C  | -1.18911200 | 1.69070500  | 0.00010200  |
| C  | -0.91311200 | 3.07923200  | 0.00027300  |
| H  | -1.72141800 | 3.80084100  | 0.00035900  |
| C  | 2.12344500  | 0.14407200  | -0.00003800 |
| C  | 3.47178500  | 0.55527100  | -0.00011700 |
| C  | 4.47454000  | -0.43319100 | -0.00026300 |
| C  | 4.10286200  | -1.76404900 | -0.00023700 |
| H  | 5.52299400  | -0.14917300 | -0.00037300 |
| H  | 4.84025600  | -2.55895400 | -0.00037500 |
| N  | 1.76845500  | -1.15455900 | 0.00010900  |
| C  | 1.43564200  | 2.54681500  | 0.00006700  |
| C  | -2.52350400 | 1.17881700  | -0.00006500 |
| C  | -3.73823100 | 1.87033600  | 0.00011700  |
| H  | -3.97507500 | 2.92484300  | 0.00029100  |
| H  | -5.69328700 | 1.09354500  | -0.00058700 |
| H  | -4.66912500 | -1.21579900 | -0.00078800 |
| N  | -2.78849400 | -0.18384800 | -0.00027600 |
| N  | -0.19785300 | 0.75835800  | 0.00001500  |
| C  | 0.38388000  | 3.50126400  | 0.00026500  |
| H  | 0.62085600  | 4.56096900  | 0.00036400  |
| C  | -4.09866300 | -0.29632900 | -0.00043400 |
| N  | -4.69233000 | 0.92510800  | -0.00037200 |
| C  | 2.78468900  | 2.91493200  | -0.00012200 |
| H  | 3.05702900  | 3.96607600  | -0.00006800 |
| C  | 3.78397800  | 1.94630200  | -0.00012400 |
| H  | 4.82629100  | 2.25333100  | -0.00032100 |
| C  | 2.74517700  | -2.07434800 | -0.00001200 |
| H  | 2.43890500  | -3.11745000 | 0.00012100  |
| Eu | -0.75188300 | -1.74726700 | 0.00013400  |

EuR<sub>3</sub>Ph<sup>3+</sup> (PBE0/6-311G\*-RECP)

|   |             |             |             |
|---|-------------|-------------|-------------|
| C | 1.05253200  | 1.16123700  | 0.00000300  |
| C | -1.20824400 | 1.68387900  | -0.00003700 |
| C | -0.94451200 | 3.07104800  | 0.00044300  |
| H | -1.74791900 | 3.79886900  | 0.00071600  |
| C | 2.10823300  | 0.15508400  | -0.00029000 |
| C | 3.45304200  | 0.57591100  | -0.00025500 |
| C | 4.46234800  | -0.40676700 | -0.00066200 |
| C | 4.10031200  | -1.73898800 | -0.00107700 |
| H | 5.50873400  | -0.11537500 | -0.00063500 |
| H | 4.84301400  | -2.52892300 | -0.00142700 |
| N | 1.76166500  | -1.14773700 | -0.00060200 |
| C | 1.40891400  | 2.55303000  | 0.00038000  |

|    |             |             |             |
|----|-------------|-------------|-------------|
| C  | -2.52784200 | 1.13678900  | -0.00043900 |
| H  | -3.83143100 | 2.82821600  | -0.00072600 |
| H  | -5.76223000 | 1.24000200  | -0.00104600 |
| H  | -4.62834200 | -1.28055300 | -0.00100800 |
| N  | -2.78685800 | -0.19130700 | -0.00068300 |
| N  | -0.21421100 | 0.75618700  | -0.00011800 |
| C  | 0.35395900  | 3.49912500  | 0.00062700  |
| H  | 0.58382400  | 4.56041000  | 0.00105000  |
| C  | -4.12186000 | -0.32487000 | -0.00093900 |
| C  | -4.72133200 | 0.94431600  | -0.00092500 |
| N  | -3.70859300 | 1.82278200  | -0.00070900 |
| C  | 2.75868600  | 2.93052700  | 0.00051300  |
| C  | 3.75795500  | 1.96993000  | 0.00019400  |
| H  | 3.02347000  | 3.98349400  | 0.00082300  |
| H  | 4.79932300  | 2.28023200  | 0.00019500  |
| C  | 2.74401100  | -2.05952000 | -0.00099700 |
| H  | 2.44610600  | -3.10520300 | -0.00131200 |
| Eu | -0.74056800 | -1.76579400 | 0.00061800  |

EuR<sub>4</sub>Ph<sup>3+</sup> (PBE0/6-311G\*-RECP)

|   |             |             |             |
|---|-------------|-------------|-------------|
| C | 2.12394000  | 0.10711400  | 0.00030100  |
| C | 4.04797100  | -1.86479200 | 0.00123100  |
| H | 4.75758600  | -2.68474400 | 0.00166400  |
| C | 1.10373500  | 1.15992000  | -0.00002300 |
| C | 1.51031100  | 2.53299300  | -0.00047100 |
| C | 0.49416700  | 3.52482800  | -0.00055300 |
| C | -0.82109600 | 3.14554100  | -0.00018400 |
| H | 0.76700600  | 4.57620900  | -0.00092800 |
| H | -1.60864000 | 3.89031200  | -0.00019500 |
| N | -0.17655800 | 0.80420700  | 0.00017800  |
| C | 3.49006800  | 0.47418500  | 0.00011400  |
| C | -1.13306700 | 1.77345800  | 0.00015300  |
| H | -4.05403600 | 2.93155200  | 0.00117000  |
| H | -5.60859100 | 0.90714800  | 0.00135900  |
| C | -2.48732100 | 1.28255100  | 0.00049400  |
| N | -2.72152500 | -0.06765600 | 0.00031600  |
| N | 1.72960300  | -1.17525800 | 0.00086200  |
| C | 4.46359900  | -0.54715800 | 0.00056500  |
| H | 5.52060900  | -0.29611600 | 0.00034200  |
| N | -3.98858200 | -0.30280600 | 0.00070400  |
| N | -4.59265900 | 0.87587500  | 0.00102300  |
| C | -3.73153100 | 1.90006800  | 0.00088500  |
| C | 3.84679600  | 1.84588500  | -0.00039600 |
| H | 4.89754500  | 2.12402400  | -0.00048200 |

|    |             |             |             |
|----|-------------|-------------|-------------|
| C  | 2.87050900  | 2.85509000  | -0.00070900 |
| H  | 3.18207200  | 3.89591700  | -0.00098900 |
| C  | 2.68122200  | -2.12706600 | 0.00131200  |
| H  | 2.34052800  | -3.15935400 | 0.00184400  |
| Eu | -0.83653700 | -1.73811400 | -0.00066100 |

EuR<sub>5</sub>Ph<sup>3+</sup> (PBE0/6-311G\*-RECP)

|    |             |             |             |
|----|-------------|-------------|-------------|
| C  | 1.07377100  | 1.15719200  | 0.00017200  |
| C  | -1.18442000 | 1.69529400  | 0.00007400  |
| C  | -0.91526900 | 3.07642200  | 0.00091500  |
| H  | -1.72670700 | 3.79461600  | 0.00106100  |
| C  | 2.12765000  | 0.13904200  | -0.00043500 |
| C  | 3.48154000  | 0.54840900  | -0.00056900 |
| C  | 4.48631400  | -0.44247000 | -0.00162900 |
| C  | 4.11163100  | -1.77285800 | -0.00243300 |
| H  | 5.53515900  | -0.15891700 | -0.00175000 |
| H  | 4.84657700  | -2.57026900 | -0.00337200 |
| N  | 1.77351500  | -1.15497100 | -0.00097900 |
| C  | 1.43476800  | 2.54200900  | 0.00091700  |
| C  | -2.53893300 | 1.19592000  | -0.00085100 |
| H  | -4.01235200 | 2.92705400  | -0.00124200 |
| N  | -2.80364500 | -0.13315300 | -0.00160700 |
| N  | -0.19649000 | 0.75991800  | -0.00011200 |
| C  | 0.38712100  | 3.49977700  | 0.00141000  |
| H  | 0.62421800  | 4.55988600  | 0.00209000  |
| N  | -4.74125600 | 0.96747300  | -0.00156800 |
| C  | -3.77432300 | 1.87281900  | -0.00144200 |
| C  | 2.78438100  | 2.90809200  | 0.00095200  |
| H  | 3.06177100  | 3.95865900  | 0.00143900  |
| C  | 3.79417400  | 1.93070300  | 0.00020200  |
| H  | 4.83523000  | 2.24349000  | -0.00005200 |
| N  | -4.11983600 | -0.17718200 | -0.00273600 |
| H  | -4.65016200 | -1.04203900 | -0.00410200 |
| C  | 2.75412600  | -2.07798700 | -0.00195000 |
| H  | 2.44525100  | -3.12019700 | -0.00237300 |
| Eu | -0.76952700 | -1.74700100 | 0.00135400  |

EuR<sub>6</sub>Ph<sup>3+</sup> (PBE0/6-311G\*-RECP)

|   |             |            |             |
|---|-------------|------------|-------------|
| C | -1.11288000 | 1.15720600 | 0.00005700  |
| C | 1.11433000  | 1.79139000 | 0.00016800  |
| C | 0.79714700  | 3.15755500 | -0.00010300 |
| H | 1.57150600  | 3.91642200 | -0.00017700 |
| C | -2.12200900 | 0.09287200 | 0.00031600  |



|    |             |             |             |
|----|-------------|-------------|-------------|
| C  | -3.49251700 | 0.44847700  | 0.00002600  |
| C  | -4.45741500 | -0.58285400 | 0.00026200  |
| C  | -4.02882400 | -1.89543300 | 0.00091500  |
| H  | -5.51672900 | -0.34163100 | -0.00007400 |
| H  | -4.73001000 | -2.72267000 | 0.00120900  |
| N  | -1.71498300 | -1.18455100 | 0.00086800  |
| C  | -1.53163000 | 2.52656000  | -0.00036500 |
| C  | 2.46122500  | 1.27012400  | 0.00042700  |
| H  | 3.87227900  | 2.87808400  | 0.00188000  |
| H  | 5.66196500  | 1.06297400  | 0.00081100  |
| N  | 2.68595800  | -0.04411700 | 0.00019300  |
| N  | 0.16722700  | 0.81428800  | 0.00020600  |
| C  | -0.52624500 | 3.52518100  | -0.00042000 |
| H  | -0.80651200 | 4.57470700  | -0.00077200 |
| N  | 3.99789500  | -0.28051600 | 0.00013800  |
| C  | 4.59228400  | 0.89876500  | 0.00062800  |
| N  | 3.66680200  | 1.88626600  | 0.00094300  |
| C  | -3.86209300 | 1.81521500  | -0.00031900 |
| H  | -4.91566800 | 2.08281600  | -0.00080700 |
| C  | -2.89737800 | 2.83537000  | -0.00068700 |
| H  | -3.22032200 | 3.87277600  | -0.00106900 |
| C  | -2.65895400 | -2.14445400 | 0.00115900  |
| H  | -2.30902600 | -3.17360100 | 0.00168900  |
| Eu | 0.87495200  | -1.74389400 | -0.00050000 |

EuR<sub>7</sub>Ph<sup>3+</sup> (PBE0/6-311G\*-RECP)

|   |             |             |             |
|---|-------------|-------------|-------------|
| C | -1.08055900 | 1.15247100  | -0.00000500 |
| C | 1.17086300  | 1.68204700  | -0.00008800 |
| C | 0.92275100  | 3.06545600  | -0.00035400 |
| H | 1.75534900  | 3.76020700  | -0.00051700 |
| C | -2.13493900 | 0.13629100  | 0.00007600  |
| C | -3.48788900 | 0.54944300  | 0.00020100  |
| C | -4.49449400 | -0.43968000 | 0.00035400  |
| C | -4.12097000 | -1.77041700 | 0.00031400  |
| H | -5.54295800 | -0.15483400 | 0.00040400  |
| H | -4.85703100 | -2.56671900 | 0.00039000  |
| N | -1.78094000 | -1.15711000 | 0.00007900  |
| C | -1.43144800 | 2.53888600  | -0.00011800 |
| C | 2.51911300  | 1.15943000  | 0.00011300  |
| N | 2.81341300  | -0.18408700 | 0.00124200  |
| N | 0.18735000  | 0.74904900  | 0.00004400  |
| C | -0.37875400 | 3.49365700  | -0.00031900 |
| H | -0.61236400 | 4.55452500  | -0.00051200 |
| C | 4.13903500  | -0.19892600 | 0.00068900  |

|    |             |             |             |
|----|-------------|-------------|-------------|
| H  | 4.79018200  | -1.06291700 | 0.00128000  |
| C  | -2.78068600 | 2.90778700  | -0.00002300 |
| H  | -3.05589600 | 3.95894400  | -0.00007400 |
| C  | -3.79436300 | 1.93244500  | 0.00016100  |
| H  | -4.83408400 | 2.24962400  | 0.00029600  |
| N  | 3.58824100  | 1.93225400  | -0.00029700 |
| N  | 4.58410100  | 1.06615200  | 0.00024000  |
| H  | 5.54468000  | 1.39668000  | 0.00005000  |
| C  | -2.76375900 | -2.07775300 | 0.00015200  |
| H  | -2.45654100 | -3.12033700 | 0.00007000  |
| Eu | 0.79079500  | -1.75628300 | -0.00027700 |

EuR<sub>8</sub>Ph<sup>3+</sup> (PBE0/6-311G\*-RECP)

|    |             |             |             |
|----|-------------|-------------|-------------|
| C  | -1.08606900 | 1.15545600  | -0.00000800 |
| C  | 1.16192500  | 1.71696500  | 0.00002900  |
| C  | 0.88437300  | 3.09444200  | -0.00042600 |
| H  | 1.68035500  | 3.83049900  | -0.00064900 |
| C  | -2.12698500 | 0.12412500  | 0.00023400  |
| C  | -3.48551600 | 0.51970500  | 0.00025700  |
| C  | -4.47965200 | -0.48286300 | 0.00055800  |
| C  | -4.08941300 | -1.80817500 | 0.00084600  |
| H  | -5.53165400 | -0.21128400 | 0.00056500  |
| H  | -4.81509000 | -2.61406200 | 0.00109400  |
| N  | -1.75716800 | -1.16476100 | 0.00050600  |
| C  | -1.46162100 | 2.53643800  | -0.00034500 |
| C  | 2.50003700  | 1.17584300  | 0.00041500  |
| H  | 3.86788600  | 2.83036200  | 0.00042900  |
| N  | 2.77408000  | -0.14194100 | 0.00073000  |
| N  | 0.18583900  | 0.77221000  | 0.00015200  |
| C  | -0.42475200 | 3.50354100  | -0.00056500 |
| H  | -0.67143200 | 4.56145200  | -0.00097800 |
| N  | 3.67487100  | 1.83463700  | 0.00046300  |
| C  | 4.12433300  | -0.19406900 | 0.00086800  |
| H  | 4.71382000  | -1.10072600 | 0.00118800  |
| N  | 4.69567300  | 1.00345000  | 0.00082600  |
| C  | -2.81696200 | 2.88735600  | -0.00040900 |
| H  | -3.10709000 | 3.93444400  | -0.00064500 |
| C  | -3.81331100 | 1.89789000  | -0.00008800 |
| H  | -4.85806100 | 2.19827900  | -0.00008300 |
| C  | -2.72782900 | -2.09786100 | 0.00080100  |
| H  | -2.40754500 | -3.13657000 | 0.00104500  |
| Eu | 0.81213400  | -1.75540200 | -0.00053500 |

AmR<sub>1</sub>Ph(NO<sub>3</sub>)<sub>3</sub> (PBE0/6-311G\*-RECP)

|    |             |             |             |
|----|-------------|-------------|-------------|
| C  | 2.70362700  | -0.54468200 | 0.04112000  |
| C  | 3.15456200  | -3.23634700 | 0.22797800  |
| H  | 3.27306000  | -4.31144400 | 0.29506800  |
| C  | 2.45498500  | 0.87035100  | -0.08082600 |
| C  | 3.54676100  | 1.76535300  | -0.08286700 |
| C  | 3.25477800  | 3.13198800  | -0.24574500 |
| C  | 1.95642400  | 3.54077900  | -0.40793300 |
| H  | 4.06509300  | 3.85504000  | -0.25131000 |
| H  | 1.71538700  | 4.58773500  | -0.54980100 |
| N  | 1.18242200  | 1.28584200  | -0.20940000 |
| C  | 4.03136800  | -1.00076300 | 0.17881000  |
| C  | 0.92991900  | 2.57935100  | -0.38601700 |
| C  | -1.12658300 | 4.17097900  | -0.73490100 |
| C  | -2.46401800 | 3.84495400  | -0.82846000 |
| H  | -0.70068800 | 5.16100600  | -0.77776400 |
| H  | -3.35476800 | 1.89244600  | -0.70772200 |
| H  | -3.34263200 | 4.45749300  | -0.95914000 |
| C  | -0.47396900 | 2.93632600  | -0.56539100 |
| N  | -1.36323000 | 1.94544600  | -0.56639800 |
| N  | 1.65145500  | -1.38912900 | -0.00479500 |
| C  | 4.23322800  | -2.38967200 | 0.27992400  |
| H  | 5.24180900  | -2.77694300 | 0.39143300  |
| N  | -2.54807600 | 2.50739600  | -0.72128900 |
| C  | 4.87558300  | 1.26770300  | 0.06966900  |
| H  | 5.69875800  | 1.97567100  | 0.07645900  |
| C  | 5.10825100  | -0.06195200 | 0.19916500  |
| H  | 6.12094700  | -0.43650900 | 0.31282500  |
| C  | 1.87348500  | -2.68813600 | 0.07918200  |
| H  | 1.00016000  | -3.32903400 | 0.00982200  |
| Am | -0.79223500 | -0.44581900 | 0.04980500  |
| N  | -3.63626500 | -1.08254900 | 0.34425800  |
| O  | -3.21150900 | -0.10611300 | -0.37625400 |
| O  | -4.80194300 | -1.30337500 | 0.47814000  |
| O  | -2.72955000 | -1.77045600 | 0.88877600  |
| N  | -0.43182600 | -1.71923700 | -2.53970100 |
| O  | -0.21821400 | -2.28127100 | -3.57378900 |
| O  | -0.78214100 | -2.35257200 | -1.48517300 |
| O  | -0.32286800 | -0.46286900 | -2.40518600 |
| N  | -0.52496300 | 0.05627000  | 2.90338600  |
| O  | -0.43721400 | 0.22141500  | 4.08396500  |
| O  | -1.07905000 | 0.90086100  | 2.13089200  |
| O  | -0.05648500 | -0.97915400 | 2.32412400  |

AmR<sub>2</sub>Ph(NO<sub>3</sub>)<sub>3</sub> (PBE0/6-311G\*-RECP)

|    |             |             |             |
|----|-------------|-------------|-------------|
| C  | 2.45794200  | 0.78512200  | -0.12113500 |
| C  | 0.98654900  | 2.53906800  | -0.44254700 |
| C  | 2.04537000  | 3.46894500  | -0.45718800 |
| H  | 1.84207300  | 4.52390200  | -0.60184800 |
| C  | 2.66129900  | -0.63640100 | 0.00183300  |
| C  | 3.97352200  | -1.13330400 | 0.14922800  |
| C  | 4.13185200  | -2.52810200 | 0.24966100  |
| C  | 3.02847900  | -3.34090400 | 0.18622100  |
| H  | 5.12717500  | -2.94609100 | 0.36955900  |
| H  | 3.11329500  | -4.41930600 | 0.25198800  |
| N  | 1.58405300  | -1.44822300 | -0.05359300 |
| C  | 3.57636900  | 1.64489600  | -0.11512700 |
| C  | -0.40110400 | 2.93091300  | -0.63654900 |
| C  | -0.97948300 | 4.15939500  | -0.83460200 |
| H  | -0.57487000 | 5.15641500  | -0.89925100 |
| H  | -3.03667900 | 4.60394600  | -1.09370700 |
| H  | -3.48475000 | 2.09934500  | -0.84477900 |
| N  | -1.37968700 | 1.96772500  | -0.63529700 |
| N  | 1.19878400  | 1.24055800  | -0.26156200 |
| C  | 3.32726800  | 3.02091600  | -0.28262500 |
| H  | 4.15960300  | 3.71862400  | -0.28178300 |
| C  | -2.51901200 | 2.58172800  | -0.81817000 |
| N  | -2.31948100 | 3.91333600  | -0.94834500 |
| C  | 4.88764900  | 1.10774300  | 0.04837900  |
| H  | 5.73207900  | 1.79020600  | 0.06236700  |
| C  | 5.07841000  | -0.22885600 | 0.17929000  |
| H  | 6.07814200  | -0.63444700 | 0.30131100  |
| C  | 1.76550100  | -2.75325000 | 0.02821900  |
| H  | 0.87256200  | -3.36557700 | -0.05032300 |
| Am | -0.82420700 | -0.41193300 | 0.06608100  |
| N  | -0.35424900 | 0.30000400  | 2.85708900  |
| O  | -1.00545900 | 1.06370200  | 2.07709900  |
| O  | -0.17349800 | 0.55946400  | 4.01125100  |
| O  | 0.10569100  | -0.75887300 | 2.31808800  |
| N  | -3.58716800 | -1.18084600 | 0.53767100  |
| O  | -3.26839500 | -0.19037000 | -0.20735800 |
| O  | -4.72522200 | -1.49806000 | 0.71737600  |
| O  | -2.61015400 | -1.78902100 | 1.06849300  |
| N  | -0.58271600 | -1.75035400 | -2.51168100 |
| O  | -0.44122800 | -0.49475400 | -2.40635500 |
| O  | -0.91186600 | -2.35506900 | -1.43523500 |
| O  | -0.41604600 | -2.33654400 | -3.54217600 |

AmR<sub>3</sub>Ph(NO<sub>3</sub>)<sub>3</sub> (PBE0/6-311G\*-RECP)

|    |             |             |             |
|----|-------------|-------------|-------------|
| C  | 2.45156300  | 0.74407500  | -0.12573300 |
| C  | 0.99973900  | 2.51071200  | -0.44740200 |
| C  | 2.06315900  | 3.43240500  | -0.46503100 |
| H  | 1.88325900  | 4.49196400  | -0.61141300 |
| C  | 2.63759900  | -0.68039700 | -0.00098100 |
| C  | 3.94394600  | -1.18999800 | 0.14665400  |
| C  | 4.08696100  | -2.58622100 | 0.24990100  |
| C  | 2.97352700  | -3.38552300 | 0.18858300  |
| H  | 5.07714000  | -3.01592200 | 0.37043100  |
| H  | 3.04573400  | -4.46469900 | 0.25675900  |
| N  | 1.55023800  | -1.47714000 | -0.05506100 |
| C  | 3.57970500  | 1.59442400  | -0.12170400 |
| C  | -0.39219000 | 2.88210700  | -0.64205200 |
| H  | -0.37364000 | 4.98809800  | -0.85714400 |
| H  | -2.87936700 | 4.87799200  | -1.13236000 |
| H  | -3.47867600 | 2.17156700  | -0.89110200 |
| N  | -1.37257800 | 1.99653600  | -0.65839300 |
| N  | 1.20105900  | 1.21106200  | -0.26489400 |
| C  | 3.34283600  | 2.97060300  | -0.29051700 |
| H  | 4.18063500  | 3.66148500  | -0.29165600 |
| C  | -2.52891400 | 2.68251600  | -0.85758900 |
| C  | -2.24891700 | 4.01844100  | -0.97186100 |
| N  | -0.89213500 | 4.12700500  | -0.83342300 |
| C  | 4.88507700  | 1.04257000  | 0.04205500  |
| C  | 5.05873800  | -0.29615000 | 0.17473800  |
| H  | 5.73787900  | 1.71437900  | 0.05514600  |
| H  | 6.05384900  | -0.71275200 | 0.29745400  |
| C  | 1.71687000  | -2.78397600 | 0.02940000  |
| H  | 0.81679600  | -3.38590500 | -0.04772700 |
| Am | -0.85886000 | -0.39786500 | 0.06882500  |
| N  | -3.60154900 | -1.18278900 | 0.56397200  |
| O  | -3.29693800 | -0.18263200 | -0.17225900 |
| O  | -4.73315300 | -1.51980500 | 0.74320800  |
| O  | -2.61330300 | -1.78229700 | 1.08975000  |
| N  | -0.57836700 | -1.75276400 | -2.49519700 |
| O  | -0.38907200 | -2.34773900 | -3.51658200 |
| O  | -0.41632400 | -0.49943500 | -2.39143700 |
| O  | -0.95262500 | -2.34476300 | -1.42647100 |
| N  | -0.28020500 | 0.35474000  | 2.83109800  |
| O  | -0.04719300 | 0.64016200  | 3.96985100  |
| O  | -0.92659800 | 1.12337300  | 2.05122500  |

|   |            |             |            |
|---|------------|-------------|------------|
| O | 0.11578700 | -0.73675500 | 2.30843900 |
|---|------------|-------------|------------|

AmR<sub>4</sub>Ph(NO<sub>3</sub>)<sub>3</sub> (PBE0/6-311G\*-RECP)

|    |             |             |             |
|----|-------------|-------------|-------------|
| C  | 2.58040200  | -0.80096100 | -0.04341300 |
| C  | 2.78092200  | -3.52497800 | 0.09804600  |
| H  | 2.79906700  | -4.60743300 | 0.14696400  |
| C  | 2.46832100  | 0.63295400  | -0.14553500 |
| C  | 3.63844200  | 1.42274500  | -0.11156600 |
| C  | 3.47918500  | 2.81287200  | -0.25698500 |
| C  | 2.22929000  | 3.34452500  | -0.44123600 |
| H  | 4.35328600  | 3.45675900  | -0.23113900 |
| H  | 2.09496100  | 4.41284900  | -0.56746500 |
| N  | 1.24426100  | 1.16994400  | -0.29647800 |
| C  | 3.85790500  | -1.37898900 | 0.10714500  |
| C  | 1.11953800  | 2.48023400  | -0.45778100 |
| H  | -0.30771900 | 5.20008300  | -0.97563800 |
| H  | -2.80443000 | 4.66956700  | -1.22099700 |
| C  | -0.23823500 | 2.96374900  | -0.67430800 |
| N  | -1.28729800 | 2.09466900  | -0.69426300 |
| N  | 1.45622100  | -1.54386600 | -0.12116200 |
| C  | 3.93089800  | -2.78227000 | 0.18553800  |
| H  | 4.89765100  | -3.26181000 | 0.30844600  |
| N  | -2.38848900 | 2.72247200  | -0.91520500 |
| N  | -2.07059000 | 4.00233800  | -1.04400500 |
| C  | -0.74839000 | 4.21952700  | -0.90424900 |
| C  | 5.01648000  | -0.54486300 | 0.16510400  |
| H  | 5.98733100  | -1.01438800 | 0.29110600  |
| C  | 4.91225800  | 0.80281300  | 0.05755400  |
| H  | 5.79705000  | 1.43093700  | 0.09432800  |
| C  | 1.55730300  | -2.85894300 | -0.06053700 |
| H  | 0.62883400  | -3.41321800 | -0.15580600 |
| Am | -0.88392300 | -0.35885600 | 0.07668300  |
| N  | -3.52743100 | -1.24006100 | 0.79267600  |
| O  | -3.33139500 | -0.22714400 | 0.04372200  |
| O  | -4.62082700 | -1.63853800 | 1.05963300  |
| O  | -2.46990500 | -1.79468400 | 1.24005700  |
| N  | -0.13824900 | 0.54745500  | 2.74981600  |
| O  | 0.17064400  | 0.90886900  | 3.84819000  |
| O  | -0.88154500 | 1.24255800  | 1.98601000  |
| O  | 0.26660500  | -0.55245100 | 2.25521900  |
| N  | -0.80595100 | -1.67193100 | -2.51860200 |
| O  | -0.70854000 | -2.24414700 | -3.56484900 |
| O  | -0.61576700 | -0.42257500 | -2.39990800 |

|   |             |             |             |
|---|-------------|-------------|-------------|
| O | -1.10384500 | -2.28184000 | -1.43692600 |
|---|-------------|-------------|-------------|

AmR<sub>5</sub>Ph(NO<sub>3</sub>)<sub>3</sub> (PBE0/6-311G\*-RECP)

|    |             |             |             |
|----|-------------|-------------|-------------|
| C  | 2.45401300  | 0.85781500  | -0.09261800 |
| C  | 0.93723200  | 2.57009300  | -0.40425700 |
| C  | 1.96327000  | 3.52999500  | -0.43579000 |
| H  | 1.72468900  | 4.57689800  | -0.58369800 |
| C  | 2.69863900  | -0.55732500 | 0.03892500  |
| C  | 4.02585900  | -1.01525400 | 0.17408300  |
| C  | 4.22587300  | -2.40383500 | 0.28343200  |
| C  | 3.14545200  | -3.24874800 | 0.24134500  |
| H  | 5.23416600  | -2.79220600 | 0.39316900  |
| H  | 3.26213300  | -4.32361400 | 0.31456300  |
| N  | 1.64443300  | -1.39991100 | 0.00364700  |
| C  | 3.54830800  | 1.75068500  | -0.10408500 |
| C  | -0.46558200 | 2.92458700  | -0.58247000 |
| H  | -0.81581400 | 5.14566800  | -0.82339400 |
| N  | -1.37115200 | 1.94775100  | -0.57741400 |
| N  | 1.18282000  | 1.27677100  | -0.22086200 |
| C  | 3.26106700  | 3.11704700  | -0.27493600 |
| H  | 4.07384700  | 3.83705000  | -0.28777200 |
| N  | -2.46336500 | 3.85180600  | -0.85307400 |
| C  | -1.16524400 | 4.12680800  | -0.76149400 |
| C  | 4.87645300  | 1.25050900  | 0.04699700  |
| H  | 5.70164800  | 1.95600600  | 0.04623000  |
| C  | 5.10524100  | -0.07890700 | 0.18402600  |
| H  | 6.11729700  | -0.45558200 | 0.29609300  |
| N  | -2.51809600 | 2.54974400  | -0.73601100 |
| H  | -3.37498200 | 2.00692300  | -0.72989900 |
| C  | 1.86491200  | -2.69886600 | 0.09467300  |
| H  | 0.99060900  | -3.33927400 | 0.03310700  |
| Am | -0.80298700 | -0.45922000 | 0.06127100  |
| N  | -3.64746000 | -1.05791600 | 0.35729800  |
| O  | -3.21524600 | -0.06988000 | -0.34172000 |
| O  | -4.81304000 | -1.27515000 | 0.48778700  |
| O  | -2.74352500 | -1.76457900 | 0.88763200  |
| N  | -0.44692200 | -1.71391500 | -2.53169800 |
| O  | -0.34548400 | -0.45679000 | -2.38813600 |
| O  | -0.23552500 | -2.26622900 | -3.57034000 |
| O  | -0.78696900 | -2.35617300 | -1.47906700 |
| N  | -0.48383100 | 0.12381500  | 2.89011900  |
| O  | -1.02156800 | 0.95934700  | 2.09425300  |

|   |             |             |            |
|---|-------------|-------------|------------|
| O | -0.06356000 | -0.94846200 | 2.34230700 |
| O | -0.36980500 | 0.33033700  | 4.06100900 |

AmR<sub>6</sub>Ph(NO<sub>3</sub>)<sub>3</sub> (PBE0/6-311G\*-RECP)

|    |             |             |             |
|----|-------------|-------------|-------------|
| C  | 2.47018900  | 0.58046500  | -0.13402200 |
| C  | 1.16030700  | 2.45054500  | -0.45142300 |
| C  | 2.28106600  | 3.29670400  | -0.43851200 |
| H  | 2.17819200  | 4.36846100  | -0.56946700 |
| C  | 2.55066100  | -0.85586400 | -0.02675800 |
| C  | 3.81548200  | -1.45767200 | 0.12930200  |
| C  | 3.85959700  | -2.86167100 | 0.21607200  |
| C  | 2.69348300  | -3.57929400 | 0.13128900  |
| H  | 4.81546500  | -3.36128700 | 0.34354700  |
| H  | 2.68820800  | -4.66155100 | 0.18729400  |
| N  | 1.41060300  | -1.57226000 | -0.10426800 |
| C  | 3.65642300  | 1.34995100  | -0.10163200 |
| C  | -0.20138500 | 2.92226600  | -0.66993400 |
| H  | -0.07703200 | 5.03740700  | -0.87816000 |
| H  | -2.61915300 | 4.94182800  | -1.22138100 |
| N  | -1.24382200 | 2.12303400  | -0.72263600 |
| N  | 1.26089600  | 1.13921100  | -0.28654300 |
| C  | 3.52278300  | 2.74060800  | -0.25156000 |
| H  | 4.40790000  | 3.36908000  | -0.22808500 |
| N  | -2.35511900 | 2.85448600  | -0.95383600 |
| C  | -1.97263900 | 4.09708000  | -1.04046800 |
| N  | -0.62609700 | 4.19478800  | -0.87031300 |
| C  | 4.99067200  | -0.64519600 | 0.18492700  |
| H  | 5.95146000  | -1.13402900 | 0.31482800  |
| C  | 4.91696600  | 0.70405600  | 0.07149300  |
| H  | 5.81536000  | 1.31244500  | 0.10709400  |
| C  | 1.48405300  | -2.88870700 | -0.03487400 |
| H  | 0.54433800  | -3.42383600 | -0.12914700 |
| Am | -0.92414800 | -0.32674400 | 0.06660900  |
| N  | -3.55299200 | -1.23870400 | 0.78519200  |
| O  | -3.36973400 | -0.21508400 | 0.04833200  |
| O  | -2.48710300 | -1.78362000 | 1.22749900  |
| O  | -4.64015800 | -1.65621200 | 1.04702300  |
| N  | -0.76429100 | -1.67176600 | -2.50970300 |
| O  | -0.53956400 | -0.42816200 | -2.39579400 |
| O  | -0.62511800 | -2.26268800 | -3.54094000 |
| O  | -1.14334300 | -2.25550700 | -1.43896300 |
| N  | -0.11231500 | 0.57478500  | 2.72824200  |



|   |             |             |            |
|---|-------------|-------------|------------|
| O | -0.83661900 | 1.29113300  | 1.96599100 |
| O | 0.23585900  | -0.54773000 | 2.24338700 |
| O | 0.23144300  | 0.93881200  | 3.81587900 |

AmR<sub>7</sub>Ph(NO<sub>3</sub>)<sub>3</sub> (PBE0/6-311G\*-RECP)

|    |             |             |             |
|----|-------------|-------------|-------------|
| C  | 2.46259800  | 0.76917100  | -0.11258800 |
| C  | 1.00728300  | 2.52320700  | -0.44211500 |
| C  | 2.05409800  | 3.45901400  | -0.46538100 |
| H  | 1.82787700  | 4.50755800  | -0.61728000 |
| C  | 2.66027000  | -0.65199900 | 0.02149500  |
| C  | 3.97103900  | -1.15026000 | 0.17100000  |
| C  | 4.12643900  | -2.54436000 | 0.28220300  |
| C  | 3.02034800  | -3.35453200 | 0.22658500  |
| H  | 5.12062800  | -2.96437400 | 0.40394200  |
| H  | 3.10237200  | -4.43258900 | 0.30055300  |
| N  | 1.57986600  | -1.45991200 | -0.02630700 |
| C  | 3.58113300  | 1.63101500  | -0.11379700 |
| C  | -0.38651900 | 2.91166900  | -0.63650200 |
| N  | -1.37041900 | 1.97473800  | -0.64263200 |
| N  | 1.20608900  | 1.22629200  | -0.25598100 |
| C  | 3.33668500  | 3.00648300  | -0.28966500 |
| H  | 4.17141200  | 3.70111400  | -0.29390600 |
| C  | -2.47004400 | 2.66885300  | -0.82548500 |
| H  | -3.47101600 | 2.26559900  | -0.86708300 |
| C  | 4.89140700  | 1.08998800  | 0.05230200  |
| H  | 5.73822100  | 1.76934900  | 0.06057000  |
| C  | 5.07742300  | -0.24616700 | 0.19255800  |
| H  | 6.07647400  | -0.65301800 | 0.31620200  |
| N  | -0.81844400 | 4.14233000  | -0.81552300 |
| N  | -2.14104100 | 3.96336600  | -0.93379600 |
| H  | -2.74371000 | 4.75701500  | -1.07611100 |
| C  | 1.75881600  | -2.76498100 | 0.06547800  |
| H  | 0.86484600  | -3.37652100 | -0.00734400 |
| Am | -0.83810400 | -0.41987800 | 0.06407300  |
| N  | -3.62072300 | -1.12394900 | 0.50125100  |
| O  | -3.27029300 | -0.13103400 | -0.22685100 |
| O  | -2.66236000 | -1.76681600 | 1.02683700  |
| O  | -4.76717900 | -1.41242700 | 0.67108400  |
| N  | -0.56532300 | -1.74497900 | -2.51230900 |
| O  | -0.42583700 | -0.48897500 | -2.39832300 |
| O  | -0.38701300 | -2.32492900 | -3.54339600 |
| O  | -0.90603300 | -2.35486500 | -1.44213700 |
| N  | -0.38915800 | 0.30679800  | 2.85091200  |

|   |             |             |            |
|---|-------------|-------------|------------|
| O | -1.00148400 | 1.08272200  | 2.04954200 |
| O | 0.04389500  | -0.77279000 | 2.33124100 |
| O | -0.22106700 | 0.57397800  | 4.00421200 |

AmR<sub>8</sub>Ph(NO<sub>3</sub>)<sub>3</sub> (PBE0/6-311G\*-RECP)

|    |             |             |             |
|----|-------------|-------------|-------------|
| C  | 2.45400100  | 0.73321000  | -0.12840700 |
| C  | 1.01583100  | 2.50482700  | -0.45503100 |
| C  | 2.07647800  | 3.42501400  | -0.47408700 |
| H  | 1.89603600  | 4.48402200  | -0.62263200 |
| C  | 2.63337300  | -0.69190600 | 0.00131200  |
| C  | 3.93771600  | -1.20474900 | 0.15167000  |
| C  | 4.07732300  | -2.60092400 | 0.25919600  |
| C  | 2.96143100  | -3.39694000 | 0.19914700  |
| H  | 5.06606200  | -3.03314100 | 0.38189200  |
| H  | 3.03021800  | -4.47610400 | 0.27034300  |
| N  | 1.54343500  | -1.48477000 | -0.05070900 |
| C  | 3.58499800  | 1.58172200  | -0.12467300 |
| C  | -0.38043700 | 2.87741600  | -0.65255300 |
| H  | -0.44992500 | 4.99390600  | -0.89022100 |
| N  | -1.36837100 | 1.99719900  | -0.66964700 |
| N  | 1.20644400  | 1.20563300  | -0.27160500 |
| C  | 3.35535400  | 2.95783600  | -0.29675400 |
| H  | 4.19594700  | 3.64504600  | -0.29797700 |
| N  | -0.90385100 | 4.09695900  | -0.85071000 |
| C  | -2.47645500 | 2.74353600  | -0.87444100 |
| H  | -3.46720500 | 2.31865600  | -0.92443200 |
| N  | -2.23530500 | 4.03200000  | -0.99397900 |
| C  | 4.88839400  | 1.02527800  | 0.04265400  |
| H  | 5.74390400  | 1.69337000  | 0.05556200  |
| C  | 5.05530000  | -0.31371300 | 0.17867600  |
| H  | 6.04870400  | -0.73368400 | 0.30378400  |
| C  | 1.70673500  | -2.79202500 | 0.03751900  |
| H  | 0.80519400  | -3.39191800 | -0.03837000 |
| Am | -0.87045200 | -0.40324100 | 0.07229700  |
| N  | -3.61817600 | -1.14433300 | 0.57351100  |
| O  | -3.29974700 | -0.14070000 | -0.15293700 |
| O  | -2.63556400 | -1.76779300 | 1.08463400  |
| O  | -4.75309300 | -1.46358100 | 0.75702400  |
| N  | -0.57968900 | -1.75239300 | -2.48916400 |
| O  | -0.41975600 | -0.49835500 | -2.38192700 |
| O  | -0.38379400 | -2.34508200 | -3.50968200 |
| O  | -0.95921500 | -2.34585500 | -1.42269200 |
| N  | -0.25985900 | 0.38291500  | 2.81630800  |

|   |             |             |            |
|---|-------------|-------------|------------|
| O | -0.89609000 | 1.15040100  | 2.02545000 |
| O | 0.10867600  | -0.72623300 | 2.31087100 |
| O | -0.01249500 | 0.68517000  | 3.94681600 |

EuR<sub>1</sub>Ph(NO<sub>3</sub>)<sub>3</sub> (PBE0/6-311G\*-RECP)

|   |             |             |             |
|---|-------------|-------------|-------------|
| C | 2.62191700  | -0.53411500 | 0.02823900  |
| C | 3.14285900  | -3.21258800 | 0.20614600  |
| H | 3.28913600  | -4.28453400 | 0.26950800  |
| C | 2.33747700  | 0.87457900  | -0.09039500 |
| C | 3.40485000  | 1.79863700  | -0.08594600 |
| C | 3.07703900  | 3.15657700  | -0.25365400 |
| C | 1.76945100  | 3.53009500  | -0.42880400 |
| H | 3.86760200  | 3.90123400  | -0.25409600 |
| H | 1.50132100  | 4.56961300  | -0.57698300 |
| N | 1.05578600  | 1.25610800  | -0.22594500 |
| C | 3.96019700  | -0.95474300 | 0.17505800  |
| C | 0.76952500  | 2.54112900  | -0.41107200 |
| C | -1.33797100 | 4.06330700  | -0.78432100 |
| C | -2.66236800 | 3.68898100  | -0.88551100 |
| H | -0.94701900 | 5.06767900  | -0.82851300 |
| H | -3.48182600 | 1.70537900  | -0.75641600 |
| H | -3.56157800 | 4.26887700  | -1.02467700 |
| C | -0.64336300 | 2.85303500  | -0.60455500 |
| N | -1.49609700 | 1.83116000  | -0.60815100 |
| N | 1.59262300  | -1.40509200 | -0.03333700 |
| C | 4.19830300  | -2.33828500 | 0.27219100  |
| H | 5.21574100  | -2.69919900 | 0.39152900  |
| N | -2.69843300 | 2.34944500  | -0.77327500 |
| C | 4.74508500  | 1.33605600  | 0.07676900  |
| H | 5.54944200  | 2.06526100  | 0.09052700  |
| C | 5.01140400  | 0.01268400  | 0.20665500  |
| H | 6.03274900  | -0.33503500 | 0.32811800  |
| C | 1.84879500  | -2.69778600 | 0.04683600  |
| H | 0.99297400  | -3.36070400 | -0.03551400 |
| N | -3.61703900 | -1.20905900 | 0.43647700  |
| O | -3.23870700 | -0.28838800 | -0.37548500 |
| O | -4.77265700 | -1.45602300 | 0.61116400  |
| O | -2.67989200 | -1.81463400 | 1.02327900  |
| N | -0.55845700 | -1.84900200 | -2.44231500 |
| O | -0.36868000 | -2.44376300 | -3.46289600 |
| O | -0.87966300 | -2.44830700 | -1.35995700 |
| O | -0.45110100 | -0.58963100 | -2.35165700 |
| N | -0.60864300 | 0.06947300  | 2.84438000  |
| O | -0.52904800 | 0.25937000  | 4.02221800  |

|    |             |             |            |
|----|-------------|-------------|------------|
| O  | -1.26862500 | 0.82776200  | 2.06948800 |
| O  | -0.02185100 | -0.90854000 | 2.27295700 |
| Eu | -0.85593900 | -0.50806300 | 0.05734800 |

EuR<sub>2</sub>Ph(NO<sub>3</sub>)<sub>3</sub> (PBE0/6-311G\*-RECP)

|   |             |             |             |
|---|-------------|-------------|-------------|
| C | 2.33551200  | 0.79804000  | -0.13217200 |
| C | 0.81485000  | 2.50818200  | -0.45760300 |
| C | 1.84504700  | 3.46972400  | -0.46165000 |
| H | 1.61114000  | 4.51859100  | -0.60454200 |
| C | 2.57874200  | -0.61805000 | -0.01944100 |
| C | 3.90358200  | -1.07736900 | 0.13495100  |
| C | 4.10144400  | -2.46791700 | 0.22544600  |
| C | 3.02227400  | -3.31101300 | 0.14498800  |
| H | 5.10723000  | -2.85822100 | 0.35135600  |
| H | 3.13739600  | -4.38711400 | 0.20277900  |
| N | 1.52542900  | -1.45885300 | -0.09311500 |
| C | 3.42774500  | 1.69061800  | -0.11414700 |
| C | -0.58373800 | 2.85321000  | -0.66210100 |
| C | -1.20467600 | 4.05939800  | -0.86807600 |
| H | -0.83600200 | 5.07028800  | -0.93345300 |
| H | -3.27505400 | 4.42686900  | -1.14331600 |
| H | -3.63189900 | 1.90788700  | -0.88672900 |
| N | -1.52550300 | 1.85450500  | -0.66439400 |
| N | 1.06489800  | 1.21658500  | -0.27746100 |
| C | 3.13846300  | 3.05932800  | -0.27756700 |
| H | 3.94940500  | 3.78173900  | -0.26674600 |
| C | -2.68475700 | 2.42558200  | -0.85645000 |
| N | -2.53402000 | 3.76372900  | -0.99008000 |
| C | 4.75275300  | 1.19066500  | 0.05706000  |
| H | 5.57704700  | 1.89703000  | 0.08244800  |
| C | 4.98102100  | -0.14078500 | 0.18119200  |
| H | 5.99118200  | -0.51766100 | 0.30943500  |
| C | 1.74398400  | -2.75847000 | -0.02019200 |
| H | 0.86887400  | -3.39445000 | -0.11266300 |
| N | -0.43101700 | 0.29574400  | 2.79589500  |
| O | -1.18513000 | 0.97546400  | 2.03491400  |
| O | -0.25328100 | 0.57493500  | 3.94644100  |
| O | 0.13812200  | -0.70200300 | 2.24444400  |
| N | -3.55538100 | -1.30126800 | 0.64778000  |
| O | -3.29116300 | -0.37232200 | -0.18991000 |
| O | -4.67667600 | -1.64471300 | 0.88029000  |
| O | -2.54618800 | -1.82020800 | 1.20970700  |
| N | -0.72867300 | -1.86950900 | -2.41767800 |

|    |             |             |             |
|----|-------------|-------------|-------------|
| O  | -0.60315400 | -0.61016900 | -2.35380700 |
| O  | -1.00474500 | -2.44734900 | -1.31316700 |
| O  | -0.59395100 | -2.48225800 | -3.43760800 |
| Eu | -0.89069200 | -0.47316400 | 0.07268200  |

EuR<sub>3</sub>Ph(NO<sub>3</sub>)<sub>3</sub> (PBE0/6-311G\*-RECP)

|   |             |             |             |
|---|-------------|-------------|-------------|
| C | 2.32466900  | 0.76683300  | -0.13189300 |
| C | 0.81685900  | 2.48495100  | -0.45648000 |
| C | 1.84792300  | 3.44277800  | -0.45812100 |
| H | 1.63286800  | 4.49654400  | -0.59880500 |
| C | 2.55635700  | -0.65204900 | -0.02066000 |
| C | 3.87736600  | -1.11933900 | 0.13440300  |
| C | 4.06539000  | -2.51128500 | 0.22411300  |
| C | 2.97920100  | -3.34536900 | 0.14229700  |
| H | 5.06782700  | -2.90976100 | 0.35060000  |
| H | 3.08602700  | -4.42235000 | 0.19971600  |
| N | 1.49604600  | -1.48214800 | -0.09638700 |
| C | 3.42330500  | 1.65472200  | -0.11187400 |
| C | -0.58603200 | 2.80426500  | -0.66506500 |
| H | -0.64878700 | 4.90852900  | -0.89301200 |
| H | -3.14609400 | 4.69647600  | -1.18838600 |
| H | -3.63769900 | 1.96886900  | -0.93708200 |
| N | -1.52913800 | 1.87995700  | -0.68606700 |
| N | 1.06086000  | 1.19236200  | -0.27741400 |
| C | 3.14092100  | 3.02328800  | -0.27292500 |
| H | 3.95452700  | 3.74242400  | -0.26016600 |
| C | -2.70963700 | 2.51798900  | -0.89869200 |
| C | -2.48308700 | 3.86383600  | -1.01745900 |
| N | -1.13300200 | 4.02772800  | -0.86682300 |
| C | 4.74468100  | 1.14476900  | 0.05997300  |
| C | 4.96118600  | -0.18875400 | 0.18248100  |
| H | 5.57479700  | 1.84403000  | 0.08738000  |
| H | 5.96848500  | -0.57297800 | 0.31145900  |
| C | 1.70480800  | -2.78338000 | -0.02395500 |
| H | 0.82469700  | -3.41225000 | -0.11736800 |
| N | -3.56763000 | -1.30851000 | 0.67679800  |
| O | -3.32002000 | -0.37108300 | -0.15501500 |
| O | -4.68091400 | -1.67251400 | 0.91233100  |
| O | -2.54635200 | -1.81598300 | 1.23263700  |
| N | -0.71992400 | -1.86641600 | -2.40911700 |
| O | -0.55679400 | -2.48345400 | -3.42221600 |
| O | -0.58328100 | -0.60817300 | -2.34423700 |
| O | -1.03778800 | -2.43802100 | -1.31262900 |

|    |             |             |            |
|----|-------------|-------------|------------|
| N  | -0.37410200 | 0.34094300  | 2.77234000 |
| O  | -0.15216100 | 0.64131200  | 3.91006100 |
| O  | -1.12944500 | 1.02707600  | 2.01815000 |
| O  | 0.14698500  | -0.68596400 | 2.22805700 |
| Eu | -0.92720200 | -0.46336600 | 0.07299100 |

EuR<sub>4</sub>Ph(NO<sub>3</sub>)<sub>3</sub> (PBE0/6-311G\*-RECP)

|   |             |             |             |
|---|-------------|-------------|-------------|
| C | 2.50634100  | -0.74555000 | -0.04507900 |
| C | 2.81447100  | -3.45861000 | 0.08937000  |
| H | 2.87525800  | -4.53967400 | 0.13534700  |
| C | 2.33682600  | 0.68278800  | -0.14317200 |
| C | 3.47385800  | 1.51927300  | -0.10758400 |
| C | 3.25792200  | 2.90194200  | -0.25186100 |
| C | 1.98742400  | 3.38218900  | -0.43742600 |
| H | 4.10486600  | 3.58114000  | -0.22483900 |
| H | 1.80929900  | 4.44401200  | -0.56434500 |
| N | 1.09204800  | 1.16924000  | -0.29282600 |
| C | 3.80566200  | -1.27215600 | 0.10647000  |
| C | 0.91404700  | 2.47299800  | -0.45464700 |
| H | -0.63431800 | 5.13024800  | -0.96021700 |
| H | -3.10318200 | 4.48508700  | -1.21888100 |
| C | -0.46283500 | 2.89747000  | -0.67333500 |
| N | -1.46950200 | 1.98016800  | -0.70275600 |
| N | 1.41260200  | -1.53110600 | -0.12867400 |
| C | 3.93426700  | -2.67163300 | 0.18121900  |
| H | 4.91900600  | -3.11287100 | 0.30489500  |
| N | -2.59768800 | 2.55726200  | -0.92363300 |
| N | -2.33948800 | 3.85193400  | -1.04334800 |
| C | -1.02941500 | 4.12986800  | -0.89711000 |
| C | 4.92951100  | -0.39201100 | 0.16824000  |
| H | 5.91834300  | -0.82219000 | 0.29507500  |
| C | 4.77142700  | 0.95062600  | 0.06231000  |
| H | 5.63026900  | 1.61367200  | 0.10126500  |
| C | 1.56553900  | -2.84099500 | -0.07045500 |
| H | 0.65943600  | -3.43065000 | -0.16955600 |
| N | -3.49827000 | -1.38350000 | 0.81846800  |
| O | -3.34452900 | -0.42385600 | -0.00478000 |
| O | -4.57369800 | -1.81764000 | 1.10365500  |
| O | -2.42142100 | -1.84367300 | 1.31944800  |
| N | -0.29464000 | 0.49857200  | 2.71702800  |
| O | -0.02516600 | 0.86449200  | 3.82488100  |
| O | -1.10009300 | 1.13199900  | 1.96610300  |
| O | 0.21872700  | -0.54518500 | 2.20254100  |

|    |             |             |             |
|----|-------------|-------------|-------------|
| N  | -0.87544900 | -1.77703200 | -2.43793800 |
| O  | -0.77901800 | -2.36160100 | -3.47793000 |
| O  | -0.70915900 | -0.52263200 | -2.34082200 |
| O  | -1.14691500 | -2.37610800 | -1.34552400 |
| Eu | -0.95184600 | -0.43001800 | 0.08118700  |

EuR<sub>5</sub>Ph(NO<sub>3</sub>)<sub>3</sub> (PBE0/6-311G\*-RECP)

|   |             |             |             |
|---|-------------|-------------|-------------|
| C | 2.33391200  | 0.86264100  | -0.10317600 |
| C | 0.77273800  | 2.53088900  | -0.43422300 |
| C | 1.77125400  | 3.51943300  | -0.45890800 |
| H | 1.50517900  | 4.55872700  | -0.61372000 |
| C | 2.61565000  | -0.54604000 | 0.02441600  |
| C | 3.95352300  | -0.96701700 | 0.17220200  |
| C | 4.19107700  | -2.35016900 | 0.27652000  |
| C | 3.13506200  | -3.22407500 | 0.21542100  |
| H | 5.20830900  | -2.71110000 | 0.39704700  |
| H | 3.28062300  | -4.29578000 | 0.28378300  |
| N | 1.58542600  | -1.41648800 | -0.03083100 |
| C | 3.40272800  | 1.78596800  | -0.10476200 |
| C | -0.63920100 | 2.83810000  | -0.62962100 |
| H | -1.07043700 | 5.04322600  | -0.88853200 |
| N | -1.50710400 | 1.82799500  | -0.62603300 |
| N | 1.05334800  | 1.24624500  | -0.24168700 |
| C | 3.07837500  | 3.14332000  | -0.28115000 |
| H | 3.87057100  | 3.88604400  | -0.28633900 |
| N | -2.66790100 | 3.68792000  | -0.92251300 |
| C | -1.38164500 | 4.01232200  | -0.82246500 |
| C | 4.74244700  | 1.32242500  | 0.06043300  |
| H | 5.54804400  | 2.05018000  | 0.06970900  |
| C | 5.00603500  | -0.00059300 | 0.19771700  |
| H | 6.02686800  | -0.34922600 | 0.32059000  |
| N | -2.67360600 | 2.38518500  | -0.79727400 |
| H | -3.50938200 | 1.81100600  | -0.78802000 |
| C | 1.84127900  | -2.70906500 | 0.05491900  |
| H | 0.98531000  | -3.37231900 | -0.02366000 |
| N | -3.62401200 | -1.18528000 | 0.47152200  |
| O | -3.24387100 | -0.26316700 | -0.33682600 |
| O | -4.77831400 | -1.42810700 | 0.65247300  |
| O | -2.68511000 | -1.80034200 | 1.05106400  |
| N | -0.58375100 | -1.85541000 | -2.43101000 |
| O | -0.48271700 | -0.59485800 | -2.33584700 |
| O | -0.39947500 | -2.44430500 | -3.45488200 |
| O | -0.89212000 | -2.46003600 | -1.34756900 |
| N | -0.56447700 | 0.14527900  | 2.82809800  |

|    |             |             |            |
|----|-------------|-------------|------------|
| O  | -1.22311000 | 0.88692600  | 2.03415100 |
| O  | -0.00856000 | -0.86626800 | 2.28530100 |
| O  | -0.46047600 | 0.38009700  | 3.99502200 |
| Eu | -0.86539600 | -0.52471800 | 0.07032100 |

EuR<sub>6</sub>Ph(NO<sub>3</sub>)<sub>3</sub> (PBE0/6-311G\*-RECP)

|   |             |             |             |
|---|-------------|-------------|-------------|
| C | 2.33592500  | 0.65512000  | -0.14770900 |
| C | 0.91947000  | 2.44219400  | -0.48325900 |
| C | 1.98662200  | 3.35463300  | -0.47074900 |
| H | 1.82004200  | 4.41757700  | -0.60800500 |
| C | 2.50001500  | -0.77392300 | -0.03882000 |
| C | 3.79756900  | -1.29925400 | 0.12371400  |
| C | 3.92447600  | -2.69827600 | 0.20851300  |
| C | 2.80330400  | -3.48320900 | 0.11409900  |
| H | 4.90740800  | -3.14076700 | 0.34132800  |
| H | 2.86209600  | -4.56408800 | 0.16711500  |
| N | 1.40447500  | -1.55502200 | -0.12531700 |
| C | 3.47397900  | 1.49421300  | -0.11444200 |
| C | -0.46955700 | 2.81908200  | -0.71274500 |
| H | -0.49577500 | 4.93099000  | -0.97276800 |
| H | -3.02529200 | 4.64510700  | -1.31211000 |
| N | -1.45219600 | 1.94617400  | -0.74774100 |
| N | 1.09726600  | 1.14106200  | -0.30696300 |
| C | 3.25820400  | 2.87372800  | -0.27266500 |
| H | 4.10405400  | 3.55408800  | -0.24736300 |
| N | -2.61243900 | 2.58928700  | -0.99556800 |
| C | -2.32010900 | 3.85360800  | -1.11091600 |
| N | -0.98395800 | 4.05215400  | -0.94215500 |
| C | 4.92198000  | -0.41806800 | 0.18545400  |
| H | 5.90938500  | -0.84870300 | 0.32186900  |
| C | 4.76961200  | 0.92429000  | 0.06769200  |
| H | 5.63051600  | 1.58447900  | 0.10626700  |
| C | 1.55596600  | -2.86474900 | -0.05854900 |
| H | 0.64919100  | -3.45311400 | -0.16080600 |
| N | -3.52703500 | -1.33911300 | 0.85494400  |
| O | -3.37709700 | -0.44758500 | -0.03985800 |
| O | -2.44899100 | -1.73669800 | 1.40992200  |
| O | -4.59793600 | -1.77173600 | 1.15918300  |
| N | -0.87567300 | -1.83597100 | -2.39331500 |
| O | -0.69404500 | -0.58108100 | -2.32385500 |
| O | -0.75547200 | -2.44707300 | -3.41585000 |
| O | -1.18550600 | -2.40349400 | -1.29542200 |
| N | -0.25673500 | 0.58209300  | 2.68853800  |
| O | -1.08702500 | 1.20021700  | 1.95596100  |



|    |             |             |            |
|----|-------------|-------------|------------|
| O  | 0.24950000  | -0.46561600 | 2.17174100 |
| O  | 0.04738500  | 0.96305800  | 3.78322800 |
| Eu | -0.98204400 | -0.41184900 | 0.08189500 |

EuR<sub>7</sub>Ph(NO<sub>3</sub>)<sub>3</sub> (PBE0/6-311G\*-RECP)

|   |             |             |             |
|---|-------------|-------------|-------------|
| C | 2.33590200  | 0.78416300  | -0.12540500 |
| C | 0.82831500  | 2.49144700  | -0.46468300 |
| C | 1.84444600  | 3.46064100  | -0.47612100 |
| H | 1.58654300  | 4.50176700  | -0.62867800 |
| C | 2.57630400  | -0.63119000 | -0.00018000 |
| C | 3.90036200  | -1.08879100 | 0.15988800  |
| C | 4.09823800  | -2.47833900 | 0.26200100  |
| C | 3.01844000  | -3.32154900 | 0.18662700  |
| H | 5.10353300  | -2.86825400 | 0.39246900  |
| H | 3.13307000  | -4.39717600 | 0.25300700  |
| N | 1.52184000  | -1.47082600 | -0.06850800 |
| C | 3.42620600  | 1.68127700  | -0.11277800 |
| C | -0.57665500 | 2.82927400  | -0.67310900 |
| N | -1.52257600 | 1.85449800  | -0.68290000 |
| N | 1.06732300  | 1.20172400  | -0.27717500 |
| C | 3.13906400  | 3.04877300  | -0.28688200 |
| H | 3.95092700  | 3.76999700  | -0.27982200 |
| C | -2.64625500 | 2.50437400  | -0.87744400 |
| H | -3.63074300 | 2.06295300  | -0.92357300 |
| C | 4.75098500  | 1.18062400  | 0.06498800  |
| H | 5.57610400  | 1.88592800  | 0.08634700  |
| C | 4.97711100  | -0.14996600 | 0.19999600  |
| H | 5.98711500  | -0.52574300 | 0.33283400  |
| N | -1.05393200 | 4.04173100  | -0.86172000 |
| N | -2.36759300 | 3.81062300  | -0.99003300 |
| H | -2.99951800 | 4.57936900  | -1.14152900 |
| C | 1.74066700  | -2.77010100 | 0.01507100  |
| H | 0.86613500  | -3.40742500 | -0.07375400 |
| N | -3.58920500 | -1.24897100 | 0.62859200  |
| O | -3.29823500 | -0.32244900 | -0.20341600 |
| O | -2.59393100 | -1.79784800 | 1.18871500  |
| O | -4.71876700 | -1.56366500 | 0.85798600  |
| N | -0.71192200 | -1.87796000 | -2.41418800 |
| O | -0.58606200 | -0.61806500 | -2.34702900 |
| O | -0.56334900 | -2.48942300 | -3.43197700 |
| O | -1.00444900 | -2.45589100 | -1.31355200 |
| N | -0.45916300 | 0.31759700  | 2.78324500  |
| O | -1.19008600 | 1.00112200  | 2.00140400  |

|    |             |             |            |
|----|-------------|-------------|------------|
| O  | 0.09534700  | -0.69985600 | 2.25316400 |
| O  | -0.29070800 | 0.61059100  | 3.93074500 |
| Eu | -0.90545100 | -0.48508400 | 0.07049800 |

EuR<sub>8</sub>Ph(NO<sub>3</sub>)<sub>3</sub> (PBE0/6-311G\*-RECP)

|   |             |             |             |
|---|-------------|-------------|-------------|
| C | 2.32494600  | 0.75823700  | -0.13450300 |
| C | 0.82806200  | 2.47901400  | -0.46735400 |
| C | 1.85509000  | 3.43666600  | -0.47289800 |
| H | 1.63812100  | 4.48914300  | -0.61897700 |
| C | 2.55217800  | -0.66092900 | -0.01559500 |
| C | 3.87194900  | -1.12911400 | 0.14367300  |
| C | 4.05874700  | -2.52067300 | 0.24060700  |
| C | 2.97135500  | -3.35345600 | 0.16124900  |
| H | 5.06039400  | -2.91981600 | 0.37056400  |
| H | 3.07639300  | -4.43027800 | 0.22390200  |
| N | 1.49049600  | -1.48910500 | -0.08800900 |
| C | 3.42512700  | 1.64611500  | -0.11645700 |
| C | -0.57957300 | 2.79719300  | -0.67934600 |
| H | -0.73348500 | 4.90831900  | -0.92794500 |
| N | -1.52911400 | 1.87657700  | -0.70165500 |
| N | 1.06320400  | 1.18718400  | -0.28486500 |
| C | 3.14803400  | 3.01410400  | -0.28391500 |
| H | 3.96353800  | 3.73085300  | -0.27310400 |
| N | -1.15054600 | 3.99366100  | -0.88728200 |
| C | -2.66476400 | 2.57543200  | -0.91896700 |
| H | -3.63665600 | 2.10977100  | -0.97501300 |
| N | -2.47687000 | 3.87267700  | -1.04238400 |
| C | 4.74541500  | 1.13397500  | 0.06035400  |
| H | 5.57722100  | 1.83102200  | 0.08628300  |
| C | 4.95719300  | -0.19945400 | 0.18912200  |
| H | 5.96342400  | -0.58528600 | 0.32164100  |
| C | 1.69798600  | -2.79040200 | -0.00911800 |
| H | 0.81746400  | -3.41904100 | -0.10032200 |
| N | -3.58676700 | -1.27148400 | 0.68557600  |
| O | -3.32573600 | -0.33473900 | -0.14355300 |
| O | -2.57027000 | -1.79796600 | 1.23527800  |
| O | -4.70367300 | -1.61830600 | 0.92413400  |
| N | -0.71467700 | -1.87656800 | -2.39823000 |
| O | -0.57833400 | -0.61760000 | -2.33350900 |
| O | -0.54121100 | -2.49489000 | -3.40782900 |
| O | -1.04367100 | -2.44569300 | -1.30323000 |
| N | -0.35912900 | 0.37528000  | 2.75594800  |
| O | -1.10637000 | 1.05958800  | 1.99065500  |
| O | 0.13961000  | -0.67196700 | 2.22941300  |

|    |             |             |            |
|----|-------------|-------------|------------|
| O  | -0.12524600 | 0.69518800  | 3.88503900 |
| Eu | -0.93958500 | -0.47145100 | 0.07661900 |

AmR<sub>1</sub>PhR<sub>1</sub><sup>3+</sup>(PBE0/6-311G\*-RECP)

|    |             |             |             |
|----|-------------|-------------|-------------|
| C  | 0.71004300  | 2.08354400  | 0.00002500  |
| C  | 2.66923200  | 0.82681500  | -0.00033600 |
| C  | 3.44215400  | 1.99409500  | -0.00041500 |
| H  | 4.52377000  | 1.92950700  | -0.00062400 |
| C  | -0.71007900 | 2.08353500  | 0.00003700  |
| C  | -1.41189700 | 3.30255300  | -0.00002400 |
| C  | -2.81968600 | 3.22390800  | -0.00018700 |
| C  | -3.44218900 | 1.99405800  | -0.00036300 |
| H  | -3.41343500 | 4.13323600  | -0.00022200 |
| H  | -4.52380400 | 1.92945400  | -0.00056100 |
| N  | -1.32494600 | 0.87264400  | -0.00003300 |
| C  | 1.41184800  | 3.30256900  | -0.00005300 |
| C  | 3.25215400  | -0.50807300 | -0.00061600 |
| C  | 4.57762600  | -0.92649200 | -0.00089500 |
| H  | 5.47754200  | -0.33041200 | -0.00096400 |
| C  | 4.51453200  | -2.31070700 | -0.00108900 |
| H  | 5.29668900  | -3.05819300 | -0.00135900 |
| H  | 2.86203800  | -3.59557000 | -0.00112100 |
| C  | -2.66925300 | 0.82678700  | -0.00030900 |
| C  | -4.57762000 | -0.92655900 | -0.00087700 |
| C  | -4.51449600 | -2.31077100 | -0.00112400 |
| H  | -5.47754800 | -0.33049700 | -0.00089600 |
| H  | -2.86197300 | -3.59559400 | -0.00125500 |
| H  | -5.29663400 | -3.05827600 | -0.00141500 |
| C  | -3.25215700 | -0.50810900 | -0.00061500 |
| N  | -2.40968000 | -1.57664300 | -0.00068100 |
| N  | 2.40970200  | -1.57663000 | -0.00062700 |
| N  | 1.32492300  | 0.87266000  | -0.00004600 |
| C  | 2.81963700  | 3.22394000  | -0.00024100 |
| H  | 3.41337900  | 4.13327300  | -0.00029700 |
| N  | 3.22384000  | -2.65297600 | -0.00088800 |
| N  | -3.22379400 | -2.65300700 | -0.00096700 |
| C  | -0.68048100 | 4.52979700  | 0.00001100  |
| H  | -1.22814300 | 5.46651400  | 0.00001600  |
| C  | 0.68041700  | 4.52980600  | -0.00000500 |
| H  | 1.22806800  | 5.46652800  | -0.00001400 |
| Am | 0.00001100  | -1.14396300 | 0.00077800  |

AmR<sub>1</sub>PhR<sub>2</sub><sup>3+</sup>(PBE0/6-311G\*-RECP)

|    |             |             |             |
|----|-------------|-------------|-------------|
| C  | -0.72757500 | 2.07213600  | -0.00684200 |
| C  | -2.66161800 | 0.77628800  | 0.15090300  |
| C  | -3.44961300 | 1.93951000  | 0.18058300  |
| H  | -4.52708400 | 1.86365100  | 0.27112300  |
| C  | 0.69011600  | 2.08092800  | 0.00477500  |
| C  | 1.39286100  | 3.29572200  | 0.05008800  |
| C  | 2.79965500  | 3.20176600  | 0.13296900  |
| C  | 3.41202000  | 1.96674800  | 0.20136000  |
| H  | 3.40180200  | 4.10513700  | 0.16367200  |
| H  | 4.48961200  | 1.89783000  | 0.29213700  |
| N  | 1.29861600  | 0.86919700  | 0.03045400  |
| C  | -1.43963600 | 3.27941900  | 0.02756100  |
| C  | -3.17301200 | -0.57181700 | 0.29272500  |
| C  | -4.43502400 | -1.06161900 | 0.49895400  |
| H  | -5.39818600 | -0.58045300 | 0.58022600  |
| H  | -5.04393600 | -3.07104400 | 0.78209100  |
| C  | 2.63399100  | 0.80142400  | 0.16288900  |
| C  | 4.48837200  | -0.97144100 | 0.51562800  |
| C  | 4.40248900  | -2.35065000 | 0.60571200  |
| H  | 5.38708600  | -0.38136900 | 0.61177500  |
| H  | 2.73793600  | -3.61553500 | 0.46843900  |
| H  | 5.16183600  | -3.10143100 | 0.77804400  |
| C  | 3.18265100  | -0.54466600 | 0.29438500  |
| N  | 2.33175700  | -1.60696500 | 0.24285100  |
| N  | -2.27287300 | -1.63758400 | 0.28230800  |
| N  | -1.32563300 | 0.85109100  | 0.02036800  |
| C  | -2.84856600 | 3.17546300  | 0.10191800  |
| H  | -3.45699300 | 4.07484100  | 0.12232500  |
| N  | 3.11886800  | -2.68104900 | 0.43774900  |
| C  | 0.65315100  | 4.51724800  | 0.03574000  |
| H  | 1.19181100  | 5.45909600  | 0.04882700  |
| C  | -0.71141000 | 4.50847700  | 0.02629300  |
| H  | -1.26109100 | 5.44406400  | 0.03688400  |
| C  | -2.99979000 | -2.73245200 | 0.48236800  |
| H  | -2.63550500 | -3.74833900 | 0.54395400  |
| N  | -4.29169900 | -2.41309300 | 0.61334300  |
| Am | 0.00721100  | -1.07697400 | -0.40670600 |

AmR<sub>1</sub>PhR<sub>3</sub><sup>3+</sup>(PBE0/6-311G\*-RECP)

|   |            |            |             |
|---|------------|------------|-------------|
| C | 0.77169100 | 2.06696900 | 0.00025800  |
| C | 2.70187900 | 0.77173600 | -0.00287300 |
| C | 3.50508100 | 1.91775100 | -0.00333800 |
| H | 4.58665500 | 1.84139400 | -0.00502000 |

|    |             |             |             |
|----|-------------|-------------|-------------|
| C  | -0.65024200 | 2.09957900  | 0.00029100  |
| C  | -1.32015500 | 3.33594800  | -0.00017200 |
| C  | -2.72987700 | 3.29443400  | -0.00157800 |
| C  | -3.38325300 | 2.08156800  | -0.00309500 |
| H  | -3.29965400 | 4.21895000  | -0.00185600 |
| H  | -4.46614700 | 2.04477600  | -0.00467200 |
| N  | -1.29554600 | 0.90459400  | -0.00040500 |
| C  | 1.50268200  | 3.27141000  | -0.00023100 |
| C  | 3.19124200  | -0.59306900 | -0.00533700 |
| H  | 5.29692400  | -0.51342300 | -0.00866100 |
| C  | 4.41342000  | -2.42816400 | -0.00920700 |
| H  | 5.31064200  | -3.02924500 | -0.01168100 |
| H  | 2.67028700  | -3.76963200 | -0.00809200 |
| C  | -2.64006900 | 0.89417900  | -0.00270600 |
| C  | -4.59961400 | -0.80178000 | -0.00732300 |
| C  | -4.57887100 | -2.18732600 | -0.00920900 |
| H  | -5.48128400 | -0.17908100 | -0.00761900 |
| H  | -2.96516100 | -3.52141300 | -0.01030600 |
| H  | -5.38334000 | -2.91070100 | -0.01150300 |
| C  | -3.26175100 | -0.42380800 | -0.00523000 |
| N  | -2.45317000 | -1.51768600 | -0.00570400 |
| N  | 2.33177100  | -1.62607400 | -0.00510400 |
| N  | 1.35814900  | 0.84622300  | -0.00044000 |
| C  | 2.90766800  | 3.16082700  | -0.00171900 |
| H  | 3.52141500  | 4.05673400  | -0.00197500 |
| N  | -3.29916400 | -2.56839900 | -0.00793300 |
| C  | -0.55933400 | 4.54584400  | 0.00026400  |
| H  | -1.08516800 | 5.49501300  | 0.00034800  |
| C  | 0.80114200  | 4.51520200  | 0.00022500  |
| H  | 1.37001700  | 5.43918200  | 0.00026700  |
| C  | 3.09355700  | -2.77582700 | -0.00730600 |
| N  | 4.44606000  | -1.06114100 | -0.00777400 |
| Am | -0.02824300 | -1.16303200 | 0.00644200  |

AmR<sub>1</sub>PhR<sub>4</sub><sup>3+</sup>(PBE0/6-311G\*-RECP)

|   |             |            |             |
|---|-------------|------------|-------------|
| C | 0.81632000  | 2.06264900 | -0.00014600 |
| C | 2.74584700  | 0.76710200 | -0.00028400 |
| C | 3.55164100  | 1.90900600 | -0.00050300 |
| H | 4.63180500  | 1.81659000 | -0.00068800 |
| C | -0.60627600 | 2.10598100 | 0.00004900  |
| C | -1.26648500 | 3.34886400 | 0.00025200  |
| C | -2.67614800 | 3.32309300 | 0.00047000  |
| C | -3.34398000 | 2.11835500 | 0.00035100  |

|    |             |             |             |
|----|-------------|-------------|-------------|
| H  | -3.23466400 | 4.25447200  | 0.00071800  |
| H  | -4.42718800 | 2.09367700  | 0.00045300  |
| N  | -1.26823400 | 0.91800500  | 0.00001100  |
| C  | 1.55278200  | 3.26427600  | -0.00027100 |
| C  | 3.25640500  | -0.59437100 | -0.00014600 |
| C  | 4.48705200  | -1.21033400 | -0.00012500 |
| H  | 5.50420000  | -0.84704200 | -0.00034300 |
| H  | 4.83040200  | -3.31330300 | 0.00025800  |
| C  | -2.61443600 | 0.92383300  | 0.00008400  |
| C  | -4.59658200 | -0.74670600 | -0.00030400 |
| C  | -4.59291600 | -2.13293500 | -0.00065900 |
| H  | -5.47084800 | -0.11362600 | -0.00014100 |
| H  | -2.99587700 | -3.48789900 | -0.00095700 |
| H  | -5.40668700 | -2.84596400 | -0.00090800 |
| C  | -3.25456100 | -0.38518100 | -0.00018400 |
| N  | -2.46025700 | -1.48980600 | -0.00039200 |
| N  | 2.32870200  | -1.59438900 | 0.00007000  |
| N  | 1.40025200  | 0.83783700  | -0.00016900 |
| C  | 2.95731000  | 3.15317300  | -0.00051900 |
| H  | 3.57115200  | 4.04901500  | -0.00074600 |
| N  | -3.31867600 | -2.53071400 | -0.00060400 |
| C  | -0.49912200 | 4.55384100  | 0.00017500  |
| H  | -1.01946000 | 5.50600000  | 0.00030200  |
| C  | 0.86019600  | 4.51333500  | -0.00012000 |
| H  | 1.43660900  | 5.43264100  | -0.00023800 |
| N  | 2.89984400  | -2.76500800 | 0.00020700  |
| N  | 4.18593200  | -2.52773000 | 0.00008600  |
| Am | -0.04689100 | -1.16132400 | 0.00020100  |

AmR<sub>1</sub>PhR<sub>5</sub><sup>3+</sup>(PBE0/6-311G\*-RECP)

|   |             |             |             |
|---|-------------|-------------|-------------|
| C | -0.73524800 | 2.06391000  | -0.00037900 |
| C | -2.66802100 | 0.77095000  | -0.13441800 |
| C | -3.46122100 | 1.92486800  | -0.15664400 |
| H | -4.53981600 | 1.84425500  | -0.22812000 |
| C | 0.68652500  | 2.07838500  | 0.00500700  |
| C | 1.37936400  | 3.30161200  | -0.01620300 |
| C | 2.78842900  | 3.22859400  | -0.08889900 |
| C | 3.41533900  | 2.00299000  | -0.16928500 |
| H | 3.37820800  | 4.14057400  | -0.10220100 |
| H | 4.49425400  | 1.94607000  | -0.25382200 |
| N | 1.30999600  | 0.87434800  | -0.03232300 |
| C | -1.45405800 | 3.27144600  | -0.02776200 |
| C | -3.21186800 | -0.57563500 | -0.24766600 |

|    |             |             |             |
|----|-------------|-------------|-------------|
| C  | -4.50971100 | -1.05376500 | -0.44354500 |
| H  | -5.45233500 | -0.53498800 | -0.54007600 |
| H  | -2.90424000 | -3.64553700 | -0.39384900 |
| C  | 2.64936700  | 0.82949400  | -0.14376400 |
| C  | 4.52644900  | -0.94168500 | -0.39480700 |
| C  | 4.43868900  | -2.32093200 | -0.49219400 |
| H  | 5.43365300  | -0.35711600 | -0.42387200 |
| H  | 2.76247900  | -3.57634600 | -0.49654600 |
| H  | 5.20369400  | -3.07553500 | -0.61845200 |
| C  | 3.21128000  | -0.50871500 | -0.26158600 |
| N  | 2.35230600  | -1.56566800 | -0.27083800 |
| N  | -2.38339200 | -1.64742300 | -0.20023300 |
| N  | -1.32859500 | 0.84628700  | -0.02598900 |
| C  | -2.86046200 | 3.16636800  | -0.09303700 |
| H  | -3.47150300 | 4.06423200  | -0.11001800 |
| N  | 3.14502900  | -2.64554300 | -0.40867900 |
| C  | 0.63237900  | 4.51789300  | -0.00516700 |
| H  | 1.16630100  | 5.46270800  | -0.01311200 |
| C  | -0.73391400 | 4.50401900  | -0.00808000 |
| H  | -1.28751000 | 5.43745700  | -0.00977000 |
| N  | -3.20745800 | -2.67996300 | -0.36787700 |
| N  | -4.45698800 | -2.38074900 | -0.51563500 |
| Am | 0.02779600  | -1.10393200 | 0.33696200  |

AmR<sub>1</sub>PhR<sub>6</sub><sup>3+</sup>(PBE0/6-311G\*-RECP)

|   |             |             |             |
|---|-------------|-------------|-------------|
| C | 0.89477800  | 2.04122200  | 0.00004400  |
| C | 2.78033500  | 0.69302800  | 0.00031000  |
| C | 3.62796400  | 1.79990500  | 0.00043600  |
| H | 4.70578600  | 1.68036700  | 0.00068500  |
| C | -0.52934900 | 2.12602300  | 0.00003200  |
| C | -1.14614700 | 3.38904100  | -0.00007800 |
| C | -2.55614600 | 3.41131100  | -0.00012100 |
| C | -3.26194300 | 2.22922600  | -0.00002700 |
| H | -3.08372500 | 4.36053900  | -0.00025900 |
| H | -4.34537900 | 2.24008900  | -0.00002500 |
| N | -1.22715700 | 0.95942200  | 0.00008800  |
| C | 1.67311200  | 3.22238100  | 0.00004200  |
| C | 3.18739800  | -0.70519900 | 0.00023300  |
| H | 5.29411900  | -0.96589500 | 0.00024200  |
| C | 4.05668300  | -2.69447700 | 0.00009900  |
| H | 4.79940900  | -3.48076300 | 0.00012400  |
| C | -2.57174200 | 1.01009200  | 0.00007400  |
| C | -4.61542800 | -0.58374700 | 0.00011400  |
| C | -4.66631600 | -1.96902700 | 0.00032600  |

|    |             |             |             |
|----|-------------|-------------|-------------|
| H  | -5.46459200 | 0.08260700  | -0.00024700 |
| H  | -3.12220000 | -3.38455200 | 0.00121700  |
| H  | -5.50717300 | -2.64985700 | 0.00036000  |
| C  | -3.25980700 | -0.27509100 | 0.00022000  |
| N  | -2.51037500 | -1.40976300 | 0.00056200  |
| N  | 2.23160500  | -1.62481500 | 0.00007900  |
| N  | 1.43844500  | 0.80746400  | 0.00010000  |
| C  | 3.07055000  | 3.06565200  | 0.00025700  |
| H  | 3.71379200  | 3.94059700  | 0.00027300  |
| N  | -3.40827600 | -2.41557400 | 0.00061700  |
| C  | -0.33875300 | 4.57038800  | -0.00013200 |
| H  | -0.83024900 | 5.53789600  | -0.00020600 |
| C  | 1.01858100  | 4.49174200  | -0.00008400 |
| H  | 1.62099800  | 5.39418400  | -0.00015300 |
| N  | 2.76496200  | -2.86641400 | -0.00005100 |
| N  | 4.35945200  | -1.35679700 | 0.00026100  |
| Am | -0.07898900 | -1.18257600 | -0.00025300 |

AmR<sub>1</sub>PhR<sub>7</sub><sup>3+</sup>(PBE0/6-311G\*-RECP)

|   |             |             |             |
|---|-------------|-------------|-------------|
| C | -0.76202000 | 2.05831700  | 0.00848000  |
| C | -2.68347000 | 0.76140400  | -0.07041400 |
| C | -3.49635100 | 1.89868100  | -0.08581300 |
| H | -4.57370800 | 1.78411100  | -0.13201400 |
| C | 0.65810900  | 2.09135100  | 0.00666800  |
| C | 1.33115100  | 3.32657100  | -0.00846400 |
| C | 2.74038000  | 3.27960100  | -0.05490000 |
| C | 3.38964600  | 2.06440400  | -0.10245500 |
| H | 3.31358000  | 4.20201000  | -0.06531800 |
| H | 4.47127500  | 2.02488400  | -0.15441000 |
| N | 1.30029600  | 0.89559000  | -0.01705100 |
| C | -1.49721800 | 3.25725400  | -0.00721600 |
| C | -3.21077900 | -0.59266300 | -0.13980900 |
| H | -5.31016500 | -2.76788400 | -0.37542100 |
| H | -2.95728000 | -3.77253700 | -0.24613300 |
| C | 2.64361400  | 0.87928700  | -0.08613100 |
| C | 4.58015000  | -0.83872600 | -0.21115200 |
| C | 4.53965100  | -2.22246100 | -0.26537300 |
| H | 5.46976500  | -0.22727700 | -0.21392600 |
| H | 2.90697400  | -3.53302000 | -0.30415800 |
| H | 5.33319900  | -2.95526100 | -0.32802600 |
| C | 3.24846800  | -0.44350500 | -0.15616800 |
| N | 2.42355700  | -1.52727300 | -0.17425200 |
| N | -2.36422700 | -1.68413000 | -0.12098100 |
| N | -1.34382600 | 0.83281100  | -0.00584600 |



|    |             |             |             |
|----|-------------|-------------|-------------|
| C  | -2.90375400 | 3.14388900  | -0.04613900 |
| H  | -3.51942000 | 4.03854600  | -0.05624500 |
| N  | 3.25480300  | -2.58746100 | -0.23411200 |
| C  | 0.56832200  | 4.53395600  | 0.00186300  |
| H  | 1.09136200  | 5.48470600  | -0.00187500 |
| C  | -0.79395300 | 4.50103000  | 0.00345900  |
| H  | -1.36262700 | 5.42523600  | 0.00451700  |
| N  | -4.47145800 | -0.91468500 | -0.24113200 |
| C  | -3.20476500 | -2.72017500 | -0.22200000 |
| N  | -4.44236000 | -2.24824200 | -0.29180000 |
| Am | 0.03954200  | -1.14672700 | 0.19034300  |

AmR<sub>1</sub>PhR<sub>8</sub><sup>3+</sup>(PBE0/6-311G\*-RECP)

|   |             |             |             |
|---|-------------|-------------|-------------|
| C | 0.80502900  | 2.03045000  | -0.00389700 |
| C | 2.70589600  | 0.69310200  | 0.17598600  |
| C | 3.53181500  | 1.82134900  | 0.21638500  |
| H | 4.60732700  | 1.72653700  | 0.31760600  |
| C | -0.62154800 | 2.08342800  | -0.01156500 |
| C | -1.27838200 | 3.32412000  | 0.01005700  |
| C | -2.69114200 | 3.28729900  | 0.09004800  |
| C | -3.35469600 | 2.08144000  | 0.18100800  |
| H | -3.25530100 | 4.21546300  | 0.10171200  |
| H | -4.43436300 | 2.05935600  | 0.27205000  |
| N | -1.28419700 | 0.90190500  | 0.03441600  |
| C | 1.55747600  | 3.22063300  | 0.02794100  |
| C | 3.13088300  | -0.69763700 | 0.28895900  |
| H | 5.23487500  | -0.75902300 | 0.59581000  |
| H | 2.66088000  | -3.84755000 | 0.40572500  |
| C | -2.62183700 | 0.88501800  | 0.15859900  |
| C | -4.53179200 | -0.83487300 | 0.47674900  |
| C | -4.48496800 | -2.21589400 | 0.57726100  |
| H | -5.41771300 | -0.22123500 | 0.54148500  |
| H | -2.84984800 | -3.52423500 | 0.50331600  |
| H | -5.26801500 | -2.94534100 | 0.73568200  |
| C | -3.21002800 | -0.44379400 | 0.28881200  |
| N | -2.38497400 | -1.53223800 | 0.26697800  |
| N | 2.24974000  | -1.71894900 | 0.22241400  |
| N | 1.37483300  | 0.80565300  | 0.04020300  |
| C | 2.95884000  | 3.07702100  | 0.12423600  |
| H | 3.59220400  | 3.95921500  | 0.14698000  |
| N | -3.20643200 | -2.58064600 | 0.44455400  |
| C | -0.49727600 | 4.51967400  | -0.00417200 |
| H | -1.00464300 | 5.47914600  | 0.00198900  |
| C | 0.86906500  | 4.47087200  | 0.00492200  |

|    |             |             |             |
|----|-------------|-------------|-------------|
| H  | 1.44508700  | 5.39057500  | 0.01870600  |
| N  | 4.29552600  | -2.55180900 | 0.56120500  |
| N  | 4.33820900  | -1.21930900 | 0.48934200  |
| C  | 3.02952200  | -2.83149200 | 0.39642200  |
| Am | -0.05021700 | -1.08515200 | -0.37938300 |

AmR<sub>2</sub>PhR<sub>2</sub><sup>3+</sup>(PBE0/6-311G\*-RECP)

|    |             |             |             |
|----|-------------|-------------|-------------|
| C  | -0.70969400 | 2.08387600  | -0.00021400 |
| C  | -2.67683600 | 0.83285100  | 0.00836200  |
| C  | -3.44561400 | 2.00638000  | 0.00910400  |
| H  | -4.52774000 | 1.94739600  | 0.01339200  |
| C  | 0.70958500  | 2.08389600  | -0.00007800 |
| C  | 1.40876900  | 3.30351300  | 0.00133300  |
| C  | 2.81889800  | 3.22992900  | 0.00549500  |
| C  | 3.44551900  | 2.00651900  | 0.00991900  |
| H  | 3.40736000  | 4.14258000  | 0.00630300  |
| H  | 4.52764400  | 1.94754400  | 0.01439800  |
| N  | 1.33088500  | 0.87151100  | 0.00168300  |
| C  | -1.40892700 | 3.30346800  | 0.00091000  |
| C  | -3.25273900 | -0.49621500 | 0.01596300  |
| C  | -4.54697800 | -0.93981400 | 0.02721600  |
| H  | -5.49461100 | -0.42279300 | 0.03259300  |
| H  | -5.26068300 | -2.93590200 | 0.04078100  |
| H  | -2.87052500 | -3.70651500 | 0.02602000  |
| C  | 2.67678600  | 0.83297500  | 0.00860200  |
| C  | 4.54696000  | -0.93971900 | 0.02683600  |
| H  | 5.49459100  | -0.42269700 | 0.03228200  |
| H  | 2.87050300  | -3.70642700 | 0.02527200  |
| H  | 5.26064300  | -2.93581000 | 0.04041500  |
| C  | 3.25272300  | -0.49609800 | 0.01584100  |
| N  | 2.40048200  | -1.59707300 | 0.01369000  |
| N  | -2.40050000 | -1.59719000 | 0.01399400  |
| N  | -1.33094000 | 0.87146900  | 0.00172900  |
| C  | -2.81904500 | 3.22980700  | 0.00464500  |
| H  | -3.40755300 | 4.14242800  | 0.00511500  |
| C  | -3.18624900 | -2.67261100 | 0.02401400  |
| C  | 3.18621500  | -2.67251900 | 0.02348400  |
| N  | -4.46918300 | -2.30301600 | 0.03206700  |
| N  | 4.46914800  | -2.30291700 | 0.03158300  |
| C  | -0.68077800 | 4.52994900  | -0.00017800 |
| H  | -1.22921200 | 5.46613600  | -0.00033000 |
| C  | 0.68058500  | 4.52996100  | 0.00007500  |
| H  | 1.22900800  | 5.46615500  | 0.00017000  |
| Am | 0.00006600  | -1.14861500 | -0.02092200 |

AmR<sub>2</sub>PhR<sub>3</sub><sup>3+</sup>(PBE0/6-311G\*-RECP)

|    |             |             |             |
|----|-------------|-------------|-------------|
| C  | -0.65158900 | 2.10056600  | 0.00005700  |
| C  | -2.64779500 | 0.90066100  | 0.00003900  |
| C  | -3.38584100 | 2.09506100  | -0.00014100 |
| H  | -4.46917400 | 2.06429400  | -0.00022000 |
| C  | 0.76984700  | 2.06651400  | 0.00009500  |
| C  | 1.50346100  | 3.27087100  | 0.00016100  |
| C  | 2.90818500  | 3.15948300  | 0.00022700  |
| C  | 3.50540600  | 1.91669700  | 0.00021300  |
| H  | 3.52175200  | 4.05547000  | 0.00029600  |
| H  | 4.58689400  | 1.83972500  | 0.00020100  |
| N  | 1.35772100  | 0.84585800  | 0.00010100  |
| C  | -1.31640000 | 3.33746600  | -0.00003400 |
| C  | -3.26028000 | -0.41196700 | 0.00018000  |
| C  | -4.56706100 | -0.81834400 | 0.00042300  |
| H  | -5.49956300 | -0.27430900 | 0.00029400  |
| H  | -5.33817700 | -2.79288300 | 0.00110300  |
| H  | -2.97075500 | -3.63210700 | 0.00094500  |
| C  | 2.70127600  | 0.77155400  | 0.00018300  |
| H  | 5.29809500  | -0.50677600 | 0.00077400  |
| H  | 2.68038500  | -3.77030500 | -0.00007400 |
| H  | 5.31919500  | -3.02276900 | 0.00080800  |
| C  | 3.19276000  | -0.59270000 | 0.00025600  |
| N  | 2.33654200  | -1.62796200 | -0.00005700 |
| N  | -2.44039700 | -1.53731700 | 0.00036800  |
| N  | -1.30166600 | 0.90410500  | 0.00007900  |
| C  | -2.72857500 | 3.30177000  | -0.00018700 |
| H  | -3.29328500 | 4.22931200  | -0.00033800 |
| C  | -3.25673400 | -2.58946500 | 0.00073000  |
| C  | 3.10150800  | -2.77562600 | 0.00012800  |
| N  | -4.52871000 | -2.18287200 | 0.00079400  |
| C  | -0.55520400 | 4.54603500  | 0.00001400  |
| H  | -1.08052500 | 5.49548900  | -0.00002000 |
| C  | 0.80554400  | 4.51497500  | 0.00012800  |
| H  | 1.37559700  | 5.43814500  | 0.00021500  |
| N  | 4.44906700  | -1.05709500 | 0.00059600  |
| C  | 4.42024400  | -2.42439800 | 0.00050100  |
| Am | -0.02600900 | -1.16580200 | -0.00036800 |

AmR<sub>2</sub>PhR<sub>4</sub><sup>3+</sup>(PBE0/6-311G\*-RECP)

|   |             |            |             |
|---|-------------|------------|-------------|
| C | -0.60916400 | 2.10624800 | -0.00014100 |
|---|-------------|------------|-------------|

|    |             |             |             |
|----|-------------|-------------|-------------|
| C  | -2.62310400 | 0.92861000  | 0.00014200  |
| C  | -3.34801600 | 2.12969900  | 0.00004600  |
| H  | -4.43158400 | 2.11040200  | 0.00021100  |
| C  | 0.81286800  | 2.06229200  | 0.00000800  |
| C  | 1.55118700  | 3.26427800  | 0.00016100  |
| C  | 2.95558200  | 3.15330200  | 0.00059200  |
| C  | 3.55053500  | 1.90990300  | 0.00075700  |
| H  | 3.56859100  | 4.04967300  | 0.00080900  |
| H  | 4.63065300  | 1.81751800  | 0.00110200  |
| N  | 1.39914000  | 0.83781100  | 0.00008800  |
| C  | -1.26496800 | 3.34916100  | -0.00026800 |
| C  | -3.25347500 | -0.37536400 | 0.00046300  |
| C  | -4.56492800 | -0.76627800 | 0.00087600  |
| H  | -5.49106600 | -0.21143700 | 0.00101100  |
| H  | -5.35957900 | -2.73175800 | 0.00107800  |
| H  | -3.00204900 | -3.60004800 | 0.00094600  |
| C  | 2.74462100  | 0.76828000  | 0.00044200  |
| C  | 4.49191300  | -1.20260100 | 0.00077600  |
| H  | 5.50735200  | -0.83479800 | 0.00116600  |
| H  | 4.84418000  | -3.30396800 | 0.00036000  |
| C  | 3.25856900  | -0.59197500 | 0.00049900  |
| N  | 2.33525100  | -1.59579300 | 0.00011500  |
| N  | -2.44801600 | -1.51074900 | 0.00048000  |
| N  | -1.27532700 | 0.91624700  | -0.00004600 |
| C  | -2.67704100 | 3.32853300  | -0.00022700 |
| H  | -3.23089400 | 4.26261400  | -0.00039600 |
| C  | -3.27651400 | -2.55421400 | 0.00082000  |
| N  | -4.54268600 | -2.13148400 | 0.00099000  |
| N  | 4.19655000  | -2.52120100 | 0.00038300  |
| C  | -0.49804000 | 4.55330400  | -0.00030200 |
| H  | -1.01842500 | 5.50543600  | -0.00049900 |
| C  | 0.86156300  | 4.51320100  | -0.00005800 |
| H  | 1.43856800  | 5.43205000  | -0.00002000 |
| N  | 2.91139000  | -2.76400900 | -0.00000900 |
| Am | -0.04378300 | -1.16389200 | -0.00049800 |

AmR<sub>2</sub>PhR<sub>5</sub><sup>3+</sup>(PBE0/6-311G\*-RECP)

|   |             |            |             |
|---|-------------|------------|-------------|
| C | -0.68923000 | 2.07718000 | -0.00663300 |
| C | -2.65285200 | 0.82606500 | 0.15759700  |
| C | -3.41745800 | 2.00538300 | 0.18242200  |
| H | -4.49642000 | 1.95225200 | 0.27144800  |
| C | 0.73168700  | 2.06241400 | 0.00301800  |
| C | 1.45276700  | 3.26897100 | 0.03706900  |

|    |             |             |             |
|----|-------------|-------------|-------------|
| C  | 2.85815000  | 3.16075100  | 0.11441000  |
| C  | 3.45683500  | 1.91843400  | 0.18602000  |
| H  | 3.47050600  | 4.05757600  | 0.13669900  |
| H  | 4.53442600  | 1.83639500  | 0.26960900  |
| N  | 1.32480900  | 0.84440000  | 0.03183600  |
| C  | -1.37953900 | 3.29964900  | 0.01696100  |
| C  | -3.19563100 | -0.50891900 | 0.28845700  |
| C  | -4.47203900 | -0.97076800 | 0.48018300  |
| H  | -5.42377400 | -0.46698500 | 0.56137800  |
| H  | -5.13206500 | -2.96752600 | 0.73085400  |
| H  | -2.73965800 | -3.70147500 | 0.49551000  |
| C  | 2.66195900  | 0.76591900  | 0.15708800  |
| C  | 4.49177200  | -1.06491100 | 0.50330600  |
| H  | 5.43471800  | -0.54907100 | 0.61112300  |
| H  | 2.87462500  | -3.64926700 | 0.44998400  |
| C  | 3.19903500  | -0.58268800 | 0.28444800  |
| N  | 2.36713300  | -1.65144100 | 0.23260900  |
| N  | -2.32289800 | -1.59651700 | 0.26656600  |
| N  | -1.31331700 | 0.87048000  | 0.03273100  |
| C  | -2.79096700 | 3.22684900  | 0.09454500  |
| H  | -3.37935100 | 4.13963800  | 0.10790700  |
| C  | -3.07790600 | -2.67580700 | 0.44519700  |
| N  | -4.36294100 | -2.32575200 | 0.57420200  |
| C  | -0.63261900 | 4.51490800  | 0.00774500  |
| H  | -1.16625200 | 5.45987300  | 0.01524900  |
| C  | 0.73408300  | 4.50147900  | 0.01484100  |
| H  | 1.28770800  | 5.43482400  | 0.01952100  |
| N  | 3.18371300  | -2.68579800 | 0.41971900  |
| N  | 4.43254000  | -2.39100000 | 0.58461700  |
| Am | -0.02206300 | -1.09417200 | -0.38384500 |

AmR<sub>2</sub>PhR<sub>6</sub><sup>3+</sup>(PBE0/6-311G\*-RECP)

|   |             |            |             |
|---|-------------|------------|-------------|
| C | 0.88983800  | 2.04159800 | -0.00009000 |
| C | 2.77831000  | 0.69603500 | -0.00001600 |
| C | 3.62543600  | 1.80318900 | -0.00015500 |
| H | 4.70328200  | 1.68426500 | -0.00015700 |
| C | -0.53379400 | 2.12617100 | 0.00001400  |
| C | -1.14710700 | 3.38879400 | 0.00010800  |
| C | -2.55936500 | 3.41517700 | 0.00039600  |
| C | -3.26723800 | 2.23852200 | 0.00049300  |
| H | -3.08294100 | 4.36653400 | 0.00054100  |
| H | -4.35088100 | 2.25410400 | 0.00072300  |
| N | -1.23490900 | 0.95745500 | 0.00004600  |
| C | 1.66931300  | 3.22354700 | -0.00019700 |

|    |             |             |             |
|----|-------------|-------------|-------------|
| C  | 3.18976200  | -0.70069200 | 0.00019500  |
| H  | 5.29790700  | -0.94880800 | 0.00005200  |
| H  | 4.81778300  | -3.46666700 | 0.00052800  |
| C  | -2.58095300 | 1.01340800  | 0.00024700  |
| C  | -4.58355600 | -0.60754800 | 0.00033500  |
| H  | -5.48773100 | -0.01755900 | 0.00073800  |
| H  | -3.13060400 | -3.49892600 | -0.00081400 |
| H  | -5.45395600 | -2.54042300 | 0.00001800  |
| C  | -3.25747700 | -0.26752600 | 0.00014500  |
| N  | -2.49730000 | -1.43328700 | -0.00028000 |
| N  | 2.23923300  | -1.62548600 | 0.00039400  |
| N  | 1.43638600  | 0.80841400  | -0.00002900 |
| C  | 3.06675600  | 3.06784500  | -0.00025800 |
| H  | 3.70868400  | 3.94370300  | -0.00036400 |
| C  | -3.36495400 | -2.44331300 | -0.00040600 |
| N  | -4.61452400 | -1.97210600 | 0.00001200  |
| C  | 1.01686700  | 4.49220700  | -0.00020200 |
| H  | 1.61929100  | 5.39455700  | -0.00031700 |
| C  | -0.34088500 | 4.56967800  | -0.00004100 |
| H  | -0.83292700 | 5.53690600  | -0.00001800 |
| N  | 2.78013800  | -2.86425300 | 0.00052600  |
| C  | 4.07063300  | -2.68468300 | 0.00043100  |
| N  | 4.36580600  | -1.34539300 | 0.00022500  |
| Am | -0.07538100 | -1.18546900 | -0.00013900 |

AmR<sub>2</sub>PhR<sub>7</sub><sup>3+</sup>(PBE0/6-311G\*-RECP)

|   |             |             |             |
|---|-------------|-------------|-------------|
| C | 0.66335500  | 2.07152400  | -0.00626000 |
| C | 2.65039400  | 0.85129700  | 0.17419700  |
| C | 3.39671700  | 2.04354900  | 0.19688200  |
| H | 4.47597600  | 2.01121500  | 0.29088400  |
| C | -0.76276700 | 2.03739300  | -0.00175300 |
| C | -1.50196900 | 3.23450200  | 0.01772000  |
| C | -2.90838100 | 3.11356700  | 0.11430300  |
| C | -3.49795100 | 1.86916700  | 0.21516500  |
| H | -3.52639300 | 4.00666200  | 0.12974600  |
| H | -4.57139600 | 1.75754900  | 0.32021600  |
| N | -1.35001600 | 0.81820800  | 0.05161500  |
| C | 1.33518100  | 3.30498300  | 0.00906900  |
| C | 3.21164900  | -0.47793400 | 0.29594200  |
| C | 4.49711100  | -0.90616000 | 0.51016500  |
| H | 5.43100700  | -0.37538800 | 0.62055300  |
| H | 5.21215300  | -2.88557200 | 0.73566900  |
| H | 2.84743500  | -3.68491200 | 0.42645400  |
| C | -2.68205400 | 0.73298500  | 0.18071400  |

|    |             |             |             |
|----|-------------|-------------|-------------|
| H  | -2.85642700 | -3.80447400 | 0.44158400  |
| H  | -5.21465900 | -2.83539000 | 0.71976400  |
| C  | -3.17272000 | -0.63405800 | 0.29833700  |
| N  | -2.30984400 | -1.71500700 | 0.23855700  |
| N  | 2.37133800  | -1.59378600 | 0.23126800  |
| N  | 1.31053600  | 0.88016300  | 0.04500800  |
| C  | 2.74903800  | 3.25291400  | 0.09678300  |
| H  | 3.32231000  | 4.17535800  | 0.10570900  |
| C  | 3.15537100  | -2.64882000 | 0.40832700  |
| C  | -3.12406200 | -2.75724000 | 0.41489300  |
| N  | 4.42761200  | -2.26389300 | 0.57656200  |
| N  | -4.36445800 | -2.30422500 | 0.56342200  |
| C  | 0.57153600  | 4.50671600  | -0.01447900 |
| H  | 1.08928300  | 5.46057200  | -0.01009500 |
| C  | -0.79856500 | 4.47387700  | -0.01016800 |
| H  | -1.36261500 | 5.40105200  | -0.00115300 |
| N  | -4.41879500 | -0.97401900 | 0.49177800  |
| Am | 0.02944600  | -1.09019300 | -0.38490300 |

AmR<sub>2</sub>PhR<sub>g</sub><sup>3+</sup>(PBE0/6-311G\*-RECP)

|   |             |             |             |
|---|-------------|-------------|-------------|
| C | 0.61048500  | 2.10750800  | 0.00014100  |
| C | 2.62863800  | 0.94347600  | -0.00040200 |
| C | 3.34481700  | 2.15115200  | -0.00022800 |
| H | 4.42857200  | 2.13999600  | -0.00037800 |
| C | -0.81109300 | 2.05058300  | -0.00007200 |
| C | -1.56639100 | 3.24443200  | -0.00029400 |
| C | -2.96788300 | 3.11241900  | -0.00084900 |
| C | -3.54636100 | 1.85848500  | -0.00127500 |
| H | -3.59559600 | 3.99863200  | -0.00097600 |
| H | -4.62635500 | 1.76097600  | -0.00182700 |
| N | -1.37961700 | 0.82250700  | -0.00029700 |
| C | 1.25305500  | 3.35538800  | 0.00013000  |
| C | 3.26418000  | -0.35752300 | -0.00132400 |
| C | 4.57738300  | -0.74274300 | -0.00254300 |
| H | 5.50112000  | -0.18369400 | -0.00295800 |
| H | 5.38088900  | -2.70444400 | -0.00418600 |
| H | 3.02842300  | -3.58336800 | -0.00281500 |
| C | -2.72110200 | 0.73193700  | -0.00102100 |
| H | -5.31522000 | -0.68136100 | -0.00233800 |
| H | -2.77972300 | -3.80976800 | -0.00186000 |
| C | -3.18994800 | -0.64483700 | -0.00149100 |
| N | -2.32241600 | -1.67444100 | -0.00136500 |
| N | 2.46285200  | -1.49668100 | -0.00131100 |
| N | 1.28182200  | 0.92235400  | 0.00000400  |

|    |             |             |             |
|----|-------------|-------------|-------------|
| C  | 2.66597700  | 3.34572900  | 0.00009300  |
| H  | 3.21377800  | 4.28342000  | 0.00016700  |
| C  | 3.29678200  | -2.53591700 | -0.00242400 |
| C  | -3.13114800 | -2.78736800 | -0.00178300 |
| N  | 4.56118700  | -2.10769200 | -0.00311300 |
| C  | 0.47107900  | 4.55167300  | 0.00009400  |
| H  | 0.98114900  | 5.50952200  | 0.00017000  |
| C  | -0.88879000 | 4.49984600  | -0.00010900 |
| H  | -1.47343500 | 5.41386300  | -0.00022200 |
| N  | -4.40014800 | -2.49054100 | -0.00224800 |
| N  | -4.41778200 | -1.15192400 | -0.00206300 |
| Am | 0.05281100  | -1.17067700 | 0.00179100  |

AmR<sub>3</sub>PhR<sub>3</sub><sup>3+</sup>(PBE0/6-311G\*-RECP)

|   |             |             |             |
|---|-------------|-------------|-------------|
| C | 0.00000000  | 0.71337900  | -2.05617400 |
| C | 0.00016900  | 2.68786100  | -0.79715900 |
| C | 0.00019100  | 3.45688100  | -1.96941000 |
| H | 0.00031900  | 4.54024600  | -1.92752600 |
| C | 0.00000000  | -0.71337900 | -2.05617400 |
| C | -0.00002900 | -1.41339900 | -3.27601100 |
| C | -0.00007800 | -2.82371900 | -3.19469700 |
| C | -0.00019100 | -3.45688100 | -1.96941000 |
| H | -0.00009200 | -3.41521600 | -4.10561000 |
| H | -0.00031900 | -4.54024600 | -1.92752600 |
| N | 0.00003200  | -1.34360500 | -0.85293600 |
| C | 0.00002900  | 1.41339900  | -3.27601100 |
| C | 0.00041100  | 3.21028100  | 0.55866100  |
| H | 0.00063500  | 5.31347000  | 0.38344000  |
| H | 0.00101900  | 5.44438300  | 2.89102600  |
| H | 0.00112200  | 2.83500500  | 3.75137500  |
| C | -0.00016900 | -2.68786100 | -0.79715900 |
| H | -0.00063500 | -5.31347000 | 0.38344000  |
| H | -0.00112200 | -2.83500500 | 3.75137500  |
| H | -0.00101900 | -5.44438300 | 2.89102600  |
| C | -0.00041100 | -3.21028100 | 0.55866100  |
| N | -0.00060000 | -2.39833900 | 1.63592600  |
| N | 0.00060000  | 2.39833900  | 1.63592600  |
| N | -0.00003200 | 1.34360500  | -0.85293600 |
| C | 0.00007800  | 2.82371900  | -3.19469700 |
| H | 0.00009200  | 3.41521600  | -4.10561000 |
| C | 0.00093200  | 3.21429100  | 2.74020800  |
| C | -0.00093200 | -3.21429100 | 2.74020800  |
| C | 0.00095700  | 4.51999800  | 2.33269900  |
| C | -0.00095700 | -4.51999800 | 2.33269900  |



|    |             |             |             |
|----|-------------|-------------|-------------|
| N  | 0.00046600  | 4.48844600  | 0.96911000  |
| N  | -0.00046600 | -4.48844600 | 0.96911000  |
| C  | 0.00003200  | 0.68118200  | -4.50227100 |
| C  | -0.00003200 | -0.68118200 | -4.50227100 |
| H  | 0.00003700  | 1.22713300  | -5.44003600 |
| H  | -0.00003700 | -1.22713300 | -5.44003600 |
| Am | 0.00000000  | 0.00000000  | 1.11931700  |

AmR<sub>3</sub>PhR<sub>4</sub><sup>3+</sup>(PBE0/6-311G\*-RECP)

|   |             |             |             |
|---|-------------|-------------|-------------|
| C | -0.67156900 | 2.09129500  | -0.00002700 |
| C | -2.64986800 | 0.86627300  | 0.00004100  |
| C | -3.41232300 | 2.03958400  | 0.00004100  |
| H | -4.49584700 | 2.00105200  | 0.00006400  |
| C | 0.75375200  | 2.08294700  | -0.00004500 |
| C | 1.45705200  | 3.30377800  | 0.00001200  |
| C | 2.86453500  | 3.23168000  | 0.00000400  |
| C | 3.49165000  | 2.00464800  | -0.00006400 |
| H | 3.45351700  | 4.14403800  | 0.00005900  |
| H | 4.57391500  | 1.94136100  | -0.00012700 |
| N | 1.37014800  | 0.87404600  | -0.00007400 |
| C | -1.36334900 | 3.31946100  | -0.00000400 |
| C | -3.19744500 | -0.47628100 | 0.00008000  |
| H | -5.29818900 | -0.30482700 | -0.00012900 |
| H | -5.42248700 | -2.81689700 | -0.00032100 |
| H | -2.81583000 | -3.67373200 | 0.00010600  |
| C | 2.71656700  | 0.84067000  | -0.00008200 |
| H | 5.52481800  | -0.67907200 | -0.00006600 |
| H | 4.93681800  | -3.16734200 | -0.00004000 |
| C | 3.26947500  | -0.50451700 | -0.00006600 |
| N | 2.37711600  | -1.53619300 | 0.00001600  |
| N | -2.38583400 | -1.54699200 | 0.00012000  |
| N | -1.30318400 | 0.89105300  | -0.00001400 |
| C | -2.77142200 | 3.25952400  | 0.00000700  |
| H | -3.35192300 | 4.17731200  | -0.00003700 |
| C | -3.19639100 | -2.66267300 | 0.00000500  |
| C | -4.49954400 | -2.25600900 | -0.00016500 |
| N | -4.47180800 | -0.88890900 | -0.00012700 |
| C | -0.62719000 | 4.54290500  | 0.00002600  |
| C | 0.73268700  | 4.53520800  | 0.00004700  |
| H | -1.17049500 | 5.48214100  | 0.00002400  |
| H | 1.28612900  | 5.46854500  | 0.00008600  |
| N | 2.98853700  | -2.68567500 | 0.00005600  |
| C | 4.52088900  | -1.07734900 | -0.00006900 |

|    |             |             |            |
|----|-------------|-------------|------------|
| N  | 4.26587900  | -2.40427300 | 0.00001600 |
| Am | -0.01696200 | -1.18253500 | 0.00002100 |

AmR<sub>3</sub>PhR<sub>5</sub><sup>3+</sup>(PBE0/6-311G\*-RECP)

|    |             |             |             |
|----|-------------|-------------|-------------|
| C  | 0.73811100  | 2.06896900  | 0.00351400  |
| C  | 2.68148000  | 0.79761700  | -0.12449000 |
| C  | 3.47065000  | 1.95543300  | -0.14611600 |
| H  | 4.55106800  | 1.89386100  | -0.21430200 |
| C  | -0.68629600 | 2.08204400  | 0.01181600  |
| C  | -1.37487400 | 3.30759300  | 0.00138300  |
| C  | -2.78349000 | 3.24381000  | -0.03741300 |
| C  | -3.41748500 | 2.01993000  | -0.08908400 |
| H  | -3.36882400 | 4.15868500  | -0.04030600 |
| H  | -4.49907700 | 1.96685800  | -0.13620000 |
| N  | -1.31150500 | 0.87907200  | -0.00952600 |
| C  | 1.45387900  | 3.28388100  | -0.01525300 |
| C  | 3.17788200  | -0.56003200 | -0.20788300 |
| H  | 5.28263400  | -0.45454900 | -0.31379900 |
| H  | 5.32227800  | -2.96654300 | -0.40149000 |
| H  | 2.69110300  | -3.73947100 | -0.29074100 |
| C  | -2.65375700 | 0.84586800  | -0.08463600 |
| H  | -5.49612500 | -0.37049700 | -0.37072600 |
| H  | -3.04178200 | -3.55954600 | -0.33939100 |
| C  | -3.24688800 | -0.48096400 | -0.18009600 |
| N  | -2.45180500 | -1.57666000 | -0.16962700 |
| N  | 2.33006100  | -1.60656800 | -0.19905300 |
| N  | 1.33963300  | 0.85839900  | -0.03157900 |
| C  | 2.86026600  | 3.18993300  | -0.08053000 |
| H  | 3.46307000  | 4.09322300  | -0.09392800 |
| C  | 3.10230900  | -2.74091900 | -0.26079000 |
| C  | 4.42122900  | -2.37621900 | -0.31943100 |
| N  | 4.43861400  | -1.01255000 | -0.28397400 |
| C  | 0.73461100  | 4.51526700  | 0.00520500  |
| C  | -0.62916500 | 4.52695000  | 0.01530500  |
| H  | 1.28829900  | 5.44853000  | 0.00062000  |
| H  | -1.16616800 | 5.46999700  | 0.02370700  |
| N  | -4.55791400 | -2.24593500 | -0.39074000 |
| N  | -3.31357900 | -2.58506200 | -0.29872400 |
| C  | -4.56635400 | -0.91781000 | -0.31716600 |
| Am | -0.00035400 | -1.15245800 | 0.24013800  |

AmR<sub>3</sub>PhR<sub>6</sub><sup>3+</sup>(PBE0/6-311G\*-RECP)

|   |             |            |            |
|---|-------------|------------|------------|
| C | -0.59663800 | 2.11331200 | 0.00005400 |
|---|-------------|------------|------------|

|    |             |             |             |
|----|-------------|-------------|-------------|
| C  | -2.60947700 | 0.95088200  | -0.00026400 |
| C  | -3.33419900 | 2.14940800  | -0.00020400 |
| H  | -4.41840100 | 2.14548900  | -0.00042200 |
| C  | 0.83120100  | 2.06461200  | -0.00003400 |
| C  | 1.57606900  | 3.26635500  | -0.00002800 |
| C  | 2.97778100  | 3.14923800  | -0.00031500 |
| C  | 3.56920700  | 1.89990000  | -0.00060700 |
| H  | 3.59623300  | 4.04185900  | -0.00039300 |
| H  | 4.64990300  | 1.80994600  | -0.00097100 |
| N  | 1.40822200  | 0.84577400  | -0.00017800 |
| C  | -1.24641300 | 3.36194700  | 0.00017200  |
| C  | -3.20557700 | -0.37127400 | -0.00049700 |
| H  | -5.29919500 | -0.11691600 | -0.00122800 |
| H  | -5.52297500 | -2.62088500 | -0.00163100 |
| H  | -2.95127300 | -3.58037200 | -0.00051800 |
| C  | 2.75211100  | 0.76940600  | -0.00049600 |
| H  | 5.31953800  | -0.79835800 | -0.00148300 |
| H  | 4.91743700  | -3.32953500 | -0.00094300 |
| C  | 3.20416600  | -0.61547600 | -0.00071200 |
| N  | 2.28307900  | -1.56939600 | -0.00017500 |
| N  | -2.43829300 | -1.47358500 | -0.00033400 |
| N  | -1.26318000 | 0.93262600  | -0.00011400 |
| C  | -2.65617300 | 3.34825700  | 0.00003700  |
| H  | -3.20735900 | 4.28394000  | 0.00006400  |
| C  | -3.29172200 | -2.55505400 | -0.00065200 |
| C  | -4.57854900 | -2.09695100 | -0.00115500 |
| C  | 4.14665100  | -2.57074600 | -0.00062500 |
| N  | -4.49635000 | -0.73287600 | -0.00098200 |
| C  | -0.47051900 | 4.56337900  | 0.00032300  |
| C  | 0.88834100  | 4.51855800  | 0.00022300  |
| H  | -0.98601600 | 5.51829600  | 0.00043300  |
| H  | 1.46752600  | 5.43611100  | 0.00029500  |
| N  | 2.86194200  | -2.79002400 | -0.00008800 |
| N  | 4.39991400  | -1.22326800 | -0.00106900 |
| Am | -0.04831900 | -1.20409300 | 0.00059000  |

AmR<sub>3</sub>PhR<sub>7</sub><sup>3+</sup>(PBE0/6-311G\*-RECP)

|   |             |            |             |
|---|-------------|------------|-------------|
| C | 0.71623600  | 2.07844900 | 0.00008600  |
| C | 2.68056700  | 0.83501800 | 0.00000600  |
| C | 3.45281900  | 2.00181700 | 0.00012400  |
| H | 4.53603200  | 1.95409000 | 0.00006300  |
| C | -0.70590500 | 2.07563500 | -0.00003800 |
| C | -1.41087500 | 3.29321500 | -0.00015600 |
| C | -2.82040700 | 3.21856700 | -0.00043900 |

|    |             |             |             |
|----|-------------|-------------|-------------|
| C  | -3.44588900 | 1.99028000  | -0.00051700 |
| H  | -3.41128600 | 4.12978900  | -0.00058100 |
| H  | -4.52678100 | 1.90293800  | -0.00074500 |
| N  | -1.31981900 | 0.86444100  | -0.00004700 |
| C  | 1.41513500  | 3.30182400  | 0.00018200  |
| C  | 3.20646100  | -0.51608900 | -0.00016800 |
| H  | 5.30893900  | -0.38153900 | 0.00003300  |
| H  | 5.38904100  | -2.89612900 | -0.00072900 |
| H  | 2.76935800  | -3.70673400 | -0.00077600 |
| C  | -2.66220000 | 0.83216800  | -0.00026000 |
| H  | -3.08473400 | -3.69393000 | 0.00015300  |
| H  | -5.40994600 | -2.61821900 | -0.00003800 |
| C  | -3.23516000 | -0.50479300 | -0.00017600 |
| N  | -2.42336700 | -1.62144800 | 0.00000100  |
| N  | 2.37434100  | -1.57210200 | -0.00055900 |
| N  | 1.33479300  | 0.87288700  | 0.00002800  |
| C  | 2.82261200  | 3.22877200  | 0.00023100  |
| H  | 3.41245600  | 4.14062600  | 0.00034300  |
| C  | 3.16629700  | -2.70205400 | -0.00060800 |
| C  | -3.29904500 | -2.63392500 | 0.00003900  |
| C  | 4.47611600  | -2.31906400 | -0.00054100 |
| N  | 4.47256900  | -0.95139500 | -0.00023000 |
| C  | 0.68021700  | 4.52640500  | 0.00016100  |
| C  | -0.68075500 | 4.52205200  | -0.00001900 |
| H  | 1.22448500  | 5.46511700  | 0.00027100  |
| H  | -1.23056600 | 5.45756800  | -0.00002800 |
| N  | -4.50877900 | -0.78914000 | -0.00019600 |
| N  | -4.52317700 | -2.12439200 | -0.00006600 |
| Am | 0.01094500  | -1.17763400 | 0.00023300  |

AmR<sub>3</sub>PhR<sub>8</sub><sup>3+</sup>(PBE0/6-311G\*-RECP)

|   |             |             |             |
|---|-------------|-------------|-------------|
| C | 0.67025400  | 2.09359600  | 0.00002400  |
| C | 2.65478900  | 0.88417600  | -0.00097300 |
| C | 3.40703100  | 2.06533900  | -0.00140600 |
| H | 4.49091600  | 2.03642600  | -0.00208100 |
| C | -0.75496900 | 2.07011200  | 0.00027200  |
| C | -1.47720300 | 3.28201700  | 0.00031800  |
| C | -2.88224000 | 3.18655900  | 0.00035500  |
| C | -3.49124600 | 1.94755100  | -0.00003900 |
| H | -3.48761400 | 4.08820200  | 0.00059700  |
| H | -4.57342100 | 1.87758400  | -0.00002700 |
| N | -1.35188200 | 0.85608300  | 0.00022100  |
| C | 1.34712200  | 3.32782600  | -0.00025700 |
| C | 3.20941200  | -0.45548300 | -0.00137900 |

|    |             |             |             |
|----|-------------|-------------|-------------|
| H  | 5.30961600  | -0.27344700 | -0.00288000 |
| H  | 5.44686500  | -2.78429400 | -0.00208400 |
| H  | 2.84581000  | -3.65505200 | -0.00022100 |
| C  | -2.69476600 | 0.79934300  | -0.00022000 |
| H  | -5.32739400 | -0.54013200 | -0.00245800 |
| H  | -2.88321800 | -3.74038700 | -0.00254600 |
| C  | -3.20131700 | -0.56475700 | -0.00121100 |
| N  | -2.36451200 | -1.61934900 | -0.00136900 |
| N  | 2.40269700  | -1.53069600 | -0.00059100 |
| N  | 1.30876000  | 0.89877700  | -0.00021800 |
| C  | 2.75646400  | 3.28042200  | -0.00095400 |
| H  | 3.32997300  | 4.20265700  | -0.00112100 |
| C  | 3.21956400  | -2.64141500 | -0.00061200 |
| C  | -3.20488500 | -2.70816100 | -0.00212000 |
| C  | 4.52102300  | -2.22801100 | -0.00157500 |
| N  | 4.48592400  | -0.86162500 | -0.00203100 |
| N  | -4.44360200 | -1.03600200 | -0.00210100 |
| C  | 0.59390100  | 4.54278000  | -0.00005000 |
| C  | -0.76645300 | 4.52138300  | 0.00023200  |
| H  | 1.12562100  | 5.48877200  | -0.00011900 |
| H  | -1.32901600 | 5.44926500  | 0.00033600  |
| N  | -4.46502800 | -2.37389900 | -0.00303000 |
| Am | 0.02743700  | -1.18844500 | 0.00141100  |

AmR<sub>4</sub>PhR<sub>4</sub><sup>3+</sup>(PBE0/6-311G\*-RECP)

|   |             |             |             |
|---|-------------|-------------|-------------|
| C | -0.71286000 | 2.08948200  | -0.00005700 |
| C | -2.69277500 | 0.86811400  | 0.00021800  |
| C | -3.45591300 | 2.03866900  | 0.00022000  |
| H | -4.53872100 | 1.98600400  | 0.00024300  |
| C | 0.71344500  | 2.08935900  | -0.00013700 |
| C | 1.40898700  | 3.31607800  | -0.00009200 |
| C | 2.81664000  | 3.25812500  | 0.00010500  |
| C | 3.45650000  | 2.03805500  | 0.00032200  |
| H | 3.39568600  | 4.17683100  | 0.00014200  |
| H | 4.53929900  | 1.98519100  | 0.00052500  |
| N | 1.34472800  | 0.88588200  | -0.00001000 |
| C | -1.40815700 | 3.31630000  | 0.00001100  |
| C | -3.26435500 | -0.46873300 | 0.00033000  |
| H | -5.52189800 | -0.61487500 | 0.00122000  |
| H | -4.96517300 | -3.11060600 | 0.00103400  |
| C | 2.69313400  | 0.86766700  | 0.00028500  |
| H | 5.52186300  | -0.61652100 | 0.00076300  |
| H | 4.96406800  | -3.11195500 | 0.00071800  |
| C | 3.26438000  | -0.46934500 | 0.00047000  |

|    |             |             |             |
|----|-------------|-------------|-------------|
| N  | 2.38561800  | -1.51213200 | 0.00023500  |
| N  | -2.38604700 | -1.51190700 | -0.00020800 |
| N  | -1.34436000 | 0.88608800  | 0.00004700  |
| C  | -2.81583800 | 3.25860100  | 0.00012700  |
| H  | -3.39468700 | 4.17743200  | 0.00014300  |
| N  | -3.01162800 | -2.65417800 | 0.00019500  |
| N  | 3.01067100  | -2.65470000 | 0.00030700  |
| N  | -4.28453200 | -2.35592500 | 0.00071100  |
| N  | 4.28370900  | -2.35701900 | 0.00051700  |
| C  | -4.52297700 | -1.02560300 | 0.00085700  |
| C  | 4.52275300  | -1.02679700 | 0.00068900  |
| C  | -0.67894500 | 4.54408400  | -0.00007300 |
| H  | -1.22846600 | 5.47970300  | -0.00007300 |
| C  | 0.67997600  | 4.54397900  | -0.00013300 |
| H  | 1.22965700  | 5.47950300  | -0.00016100 |
| Am | -0.00013400 | -1.18254400 | -0.00037900 |

AmR<sub>4</sub>PhR<sub>5</sub><sup>3+</sup>(PBE0/6-311G\*-RECP)

|   |             |             |             |
|---|-------------|-------------|-------------|
| C | -0.64217900 | 2.09106300  | -0.00001000 |
| C | -2.63298300 | 0.88164700  | 0.00043600  |
| C | -3.38171400 | 2.06310500  | 0.00021100  |
| H | -4.46481700 | 2.02215700  | 0.00030000  |
| C | 0.78082400  | 2.06946200  | 0.00012000  |
| C | 1.49790100  | 3.28276100  | 0.00020000  |
| C | 2.90429500  | 3.19517600  | 0.00053800  |
| C | 3.51942700  | 1.96093200  | 0.00079500  |
| H | 3.50322500  | 4.10114100  | 0.00066300  |
| H | 4.60104100  | 1.88656200  | 0.00114500  |
| N | 1.38553100  | 0.85350100  | 0.00027300  |
| C | -1.32220000 | 3.32442000  | -0.00015400 |
| C | -3.25540500 | -0.43370800 | 0.00089400  |
| H | -5.51088000 | -0.29564600 | 0.00150200  |
| C | 2.73337300  | 0.80583200  | 0.00063400  |
| H | 5.51605200  | -0.77432600 | 0.00154300  |
| H | 4.87040900  | -3.24838400 | 0.00142100  |
| C | 3.26532900  | -0.54695600 | 0.00090500  |
| N | 2.34970200  | -1.55824800 | 0.00058600  |
| N | -2.47672800 | -1.54121800 | 0.00093300  |
| N | -1.28591200 | 0.89303400  | 0.00016600  |
| C | -2.73094300 | 3.27827400  | -0.00011800 |
| H | -3.30338100 | 4.20126200  | -0.00031400 |
| N | 2.93408600  | -2.72270700 | 0.00086000  |
| N | 4.21652300  | -2.47006800 | 0.00126700  |

|    |             |             |             |
|----|-------------|-------------|-------------|
| C  | -4.58647900 | -0.85459400 | 0.00136100  |
| C  | 4.50285300  | -1.14895600 | 0.00128200  |
| C  | -0.57386900 | 4.54119600  | -0.00023900 |
| H  | -1.10877100 | 5.48529300  | -0.00039800 |
| C  | 0.78589900  | 4.52113100  | -0.00001500 |
| H  | 1.34820600  | 5.44918900  | 0.00000200  |
| N  | -3.35926400 | -2.54368200 | 0.00148900  |
| H  | -3.10550600 | -3.52425400 | 0.00191900  |
| N  | -4.60009700 | -2.18518200 | 0.00169300  |
| Am | -0.01765500 | -1.16385000 | -0.00104900 |

AmR<sub>4</sub>PhR<sub>6</sub><sup>3+</sup>(PBE0/6-311G\*-RECP)

|   |             |             |             |
|---|-------------|-------------|-------------|
| C | -0.79354800 | 2.07171400  | 0.00005700  |
| C | -2.73016500 | 0.79494400  | 0.00044500  |
| C | -3.53730900 | 1.93133600  | 0.00085200  |
| H | -4.61869700 | 1.85039700  | 0.00131400  |
| C | 0.63557500  | 2.11436500  | -0.00025100 |
| C | 1.28731100  | 3.36284400  | -0.00031800 |
| C | 2.69651400  | 3.35359000  | -0.00057600 |
| C | 3.37554500  | 2.15569000  | -0.00059300 |
| H | 3.24456400  | 4.29111100  | -0.00069500 |
| H | 4.45953400  | 2.13909400  | -0.00093600 |
| N | 1.30398300  | 0.93180700  | -0.00024500 |
| C | -1.53228000 | 3.27900800  | 0.00031400  |
| C | -3.20022400 | -0.58311400 | 0.00028700  |
| H | -5.31741400 | -0.74138700 | 0.00000000  |
| C | 2.65149200  | 0.95910800  | -0.00032500 |
| H | 5.53454200  | -0.40868600 | 0.00060200  |
| H | 5.08136800  | -2.92522500 | 0.00115100  |
| C | 3.27257500  | -0.35598400 | 0.00010100  |
| N | 2.43812700  | -1.43456600 | 0.00019500  |
| N | -2.29095300 | -1.54834400 | -0.00012000 |
| N | -1.38390900 | 0.85733800  | 0.00007600  |
| C | -2.93446000 | 3.17473700  | 0.00072400  |
| H | -3.54404800 | 4.07343100  | 0.00094800  |
| N | 3.11032000  | -2.54895200 | 0.00099000  |
| N | 4.37049000  | -2.19897600 | 0.00101400  |
| C | 4.55340100  | -0.86022100 | 0.00059000  |
| C | -0.84141300 | 4.52864500  | 0.00020500  |
| H | -1.41809400 | 5.44774800  | 0.00031700  |
| C | 0.51667500  | 4.56776600  | -0.00010700 |
| H | 1.03714900  | 5.51998300  | -0.00014900 |
| N | -2.88329600 | -2.76243100 | -0.00049800 |
| H | -4.94467000 | -3.27757300 | -0.00012100 |

|    |             |             |             |
|----|-------------|-------------|-------------|
| C  | -4.16503100 | -2.52777900 | -0.00013500 |
| N  | -4.40263100 | -1.17685300 | 0.00003000  |
| Am | 0.03287300  | -1.20633600 | -0.00021200 |

AmR<sub>4</sub>PhR<sub>7</sub><sup>3+</sup>(PBE0/6-311G\*-RECP)

|    |             |             |             |
|----|-------------|-------------|-------------|
| C  | -0.66432500 | 2.08210300  | 0.00000900  |
| C  | -2.63775400 | 0.85889500  | 0.00006300  |
| C  | -3.40962300 | 2.02356700  | 0.00018100  |
| H  | -4.49130800 | 1.94672600  | 0.00024400  |
| C  | 0.75871400  | 2.07616400  | -0.00006200 |
| C  | 1.46153300  | 3.29779700  | -0.00008000 |
| C  | 2.86866900  | 3.22607400  | -0.00012400 |
| C  | 3.49741500  | 1.99878600  | -0.00011200 |
| H  | 3.45742500  | 4.13863000  | -0.00018400 |
| H  | 4.57975000  | 1.93653900  | -0.00012800 |
| N  | 1.37641000  | 0.86721000  | -0.00008000 |
| C  | -1.36137900 | 3.30558300  | 0.00009300  |
| C  | -3.22826100 | -0.47019400 | 0.00003700  |
| C  | 2.72403800  | 0.83497000  | -0.00008700 |
| H  | 5.52653900  | -0.70311700 | 0.00007800  |
| H  | 4.92023200  | -3.18700000 | 0.00040500  |
| C  | 3.27277900  | -0.51142300 | -0.00003800 |
| N  | 2.37293700  | -1.53690800 | 0.00005400  |
| N  | -2.43049000 | -1.59666000 | -0.00003600 |
| N  | -1.29335900 | 0.87650100  | -0.00000600 |
| C  | -2.77116700 | 3.24492900  | 0.00019100  |
| H  | -3.35213500 | 4.16252100  | 0.00025800  |
| N  | 2.97581300  | -2.69188500 | 0.00028500  |
| N  | 4.25436200  | -2.41924100 | 0.00030400  |
| C  | 4.51958200  | -1.09390800 | 0.00014500  |
| C  | -0.62623400 | 4.53061900  | 0.00008800  |
| H  | -1.17186400 | 5.46854400  | 0.00012100  |
| C  | 0.73383400  | 4.52691100  | -0.00000500 |
| H  | 1.28449200  | 5.46189700  | -0.00001600 |
| H  | -5.42783400 | -2.55811600 | 0.00001000  |
| C  | -3.31788300 | -2.59976800 | -0.00006900 |
| H  | -3.11515800 | -3.66216600 | -0.00012500 |
| N  | -4.53507700 | -2.07489500 | 0.00000900  |
| N  | -4.50494200 | -0.73953000 | 0.00009100  |
| Am | -0.00673000 | -1.17666600 | -0.00006700 |

AmR<sub>4</sub>PhR<sub>8</sub><sup>3+</sup>(PBE0/6-311G\*-RECP)

|   |             |            |             |
|---|-------------|------------|-------------|
| C | -0.71396300 | 2.07714000 | -0.00008100 |
|---|-------------|------------|-------------|



|    |             |             |             |
|----|-------------|-------------|-------------|
| C  | -2.67081700 | 0.82646500  | -0.00010700 |
| C  | -3.45587000 | 1.98123300  | -0.00012600 |
| H  | -4.53864000 | 1.92163900  | -0.00005400 |
| C  | 0.71242000  | 2.09269400  | 0.00000900  |
| C  | 1.39285800  | 3.32567000  | 0.00013200  |
| C  | 2.80174700  | 3.28042700  | 0.00022300  |
| C  | 3.45157000  | 2.06527500  | 0.00011300  |
| H  | 3.37362100  | 4.20367900  | 0.00038800  |
| H  | 4.53488400  | 2.02227900  | 0.00010000  |
| N  | 1.35087900  | 0.89501400  | -0.00002400 |
| C  | -1.42865500 | 3.29507900  | -0.00014500 |
| C  | -3.19557800 | -0.53028800 | -0.00007200 |
| C  | 2.69848300  | 0.88700400  | -0.00000900 |
| H  | 5.53393800  | -0.58696900 | -0.00015200 |
| H  | 4.98528400  | -3.08436700 | -0.00045300 |
| C  | 3.27588900  | -0.44763500 | -0.00011400 |
| N  | 2.40038400  | -1.49386100 | -0.00010500 |
| N  | -2.37200200 | -1.59529800 | 0.00002800  |
| N  | -1.32571900 | 0.86844200  | -0.00009900 |
| C  | -2.83408300 | 3.21354600  | -0.00018100 |
| H  | -3.42971000 | 4.12167300  | -0.00025800 |
| N  | 3.02984800  | -2.63372300 | -0.00020700 |
| N  | 4.30199800  | -2.33182300 | -0.00026500 |
| C  | 4.53616200  | -1.00079200 | -0.00020800 |
| C  | -0.71321000 | 4.53094800  | -0.00008300 |
| H  | -1.27199100 | 5.46108500  | -0.00019200 |
| C  | 0.64632000  | 4.54493200  | 0.00008900  |
| H  | 1.18406200  | 5.48752300  | 0.00019800  |
| C  | -3.22509600 | -2.67530700 | 0.00010500  |
| H  | -2.91499200 | -3.71115700 | 0.00016800  |
| N  | -4.44306800 | -0.98673300 | -0.00010500 |
| H  | -5.32114400 | -0.48063700 | -0.00021500 |
| N  | -4.48035600 | -2.32467200 | -0.00004400 |
| Am | 0.01012500  | -1.18878400 | 0.00009400  |

AmR<sub>5</sub>PhR<sub>5</sub><sup>3+</sup>(PBE0/6-311G\*-RECP)

|   |             |            |             |
|---|-------------|------------|-------------|
| C | -0.71014700 | 2.06705400 | 0.00336400  |
| C | -2.66526800 | 0.80539400 | -0.11697800 |
| C | -3.44303600 | 1.97038000 | -0.12426900 |
| H | -4.52335300 | 1.90543000 | -0.18511400 |
| C | 0.71630600  | 2.06419200 | -0.00272500 |
| C | 1.42227300  | 3.28241300 | -0.01977100 |
| C | 2.83049200  | 3.20082000 | -0.10022900 |

|    |             |             |             |
|----|-------------|-------------|-------------|
| C  | 3.44738700  | 1.97036200  | -0.18449600 |
| H  | 3.42676800  | 4.10867900  | -0.11276000 |
| H  | 4.52597600  | 1.90431200  | -0.27034100 |
| N  | 1.32795500  | 0.85699300  | -0.05063200 |
| C  | -1.41422400 | 3.28505100  | -0.01252000 |
| C  | -3.23042900 | -0.53042200 | -0.24029200 |
| H  | -5.47144100 | -0.44681900 | -0.52834200 |
| C  | 2.66945800  | 0.80533800  | -0.15608600 |
| H  | 5.48093800  | -0.48659600 | -0.45811900 |
| C  | 3.22925400  | -0.53284500 | -0.25571500 |
| N  | 2.40239200  | -1.60648500 | -0.23934600 |
| N  | -2.42097700 | -1.61788500 | -0.20779600 |
| N  | -1.32195100 | 0.86111300  | -0.01751800 |
| C  | -2.82384500 | 3.20203100  | -0.06176000 |
| H  | -3.42095300 | 4.10945500  | -0.06779000 |
| N  | -4.50808400 | -2.30930000 | -0.52980200 |
| N  | 4.48933200  | -2.33458900 | -0.46604100 |
| C  | -4.53752100 | -0.98287700 | -0.44055700 |
| C  | 4.53620000  | -1.00730200 | -0.39750300 |
| C  | -0.68087300 | 4.50673500  | 0.00725100  |
| H  | -1.22178900 | 5.44775900  | 0.01538400  |
| C  | 0.69015700  | 4.50491200  | -0.00049200 |
| H  | 1.23315300  | 5.44473500  | -0.01164800 |
| N  | -3.26317500 | -2.63176300 | -0.38843600 |
| H  | -2.97708600 | -3.60262100 | -0.42689900 |
| N  | 3.23502500  | -2.63691600 | -0.36578400 |
| H  | 2.93530300  | -3.60318800 | -0.41578400 |
| Am | 0.00222900  | -1.12122900 | 0.32563700  |

AmR<sub>5</sub>PhR<sub>6</sub><sup>3+</sup>(PBE0/6-311G\*-RECP)

|   |             |            |             |
|---|-------------|------------|-------------|
| C | -0.56832200 | 2.11168400 | 0.00010100  |
| C | -2.59319900 | 0.96631800 | -0.00015800 |
| C | -3.30431800 | 2.17219500 | -0.00031400 |
| H | -4.38818900 | 2.16564900 | -0.00050800 |
| C | 0.85724000  | 2.05054700 | -0.00004400 |
| C | 1.61498300  | 3.24520100 | -0.00000200 |
| C | 3.01513700  | 3.11399300 | -0.00018400 |
| C | 3.59553400  | 1.85834700 | -0.00050600 |
| H | 3.64245700  | 4.00050600 | -0.00006500 |
| H | 4.67537900  | 1.75817900 | -0.00069500 |
| N | 1.42350400  | 0.82609000 | -0.00031700 |
| C | -1.20652000 | 3.36518900 | 0.00005800  |

|    |             |             |             |
|----|-------------|-------------|-------------|
| C  | -3.26223200 | -0.32659800 | -0.00050000 |
| H  | -5.51153100 | -0.10491400 | -0.00053500 |
| C  | 2.76842900  | 0.73659100  | -0.00061600 |
| H  | 5.30875500  | -0.89040500 | -0.00126200 |
| C  | 3.19935600  | -0.65420600 | -0.00071600 |
| N  | 2.25508000  | -1.58640000 | -0.00032300 |
| N  | -2.52622700 | -1.46237300 | -0.00067600 |
| N  | -1.24719700 | 0.93379400  | 0.00012500  |
| C  | -2.61634400 | 3.36583500  | -0.00013100 |
| H  | -3.15893100 | 4.30666500  | -0.00017800 |
| N  | -4.67185500 | -2.02665400 | -0.00105500 |
| C  | -4.60830700 | -0.69747800 | -0.00069100 |
| C  | -0.41919700 | 4.55999400  | 0.00011700  |
| H  | -0.92672600 | 5.51922700  | 0.00015000  |
| C  | 0.93919100  | 4.50356500  | 0.00015500  |
| H  | 1.52658800  | 5.41591700  | 0.00031600  |
| N  | -3.44482100 | -2.43049700 | -0.00095300 |
| H  | -3.22693200 | -3.41984400 | -0.00132800 |
| N  | 2.80225900  | -2.82147600 | -0.00046300 |
| N  | 4.37825600  | -1.29198200 | -0.00091900 |
| C  | 4.09178700  | -2.63397700 | -0.00069500 |
| H  | 4.84406400  | -3.41140100 | -0.00081600 |
| Am | -0.04828600 | -1.18680300 | 0.00065000  |

AmR<sub>5</sub>PhR<sub>7</sub><sup>3+</sup>(PBE0/6-311G\*-RECP)

|   |             |             |             |
|---|-------------|-------------|-------------|
| C | 0.70134400  | 2.06868800  | 0.00810700  |
| C | 2.65975700  | 0.81747200  | -0.13915800 |
| C | 3.43047500  | 1.98683000  | -0.16277800 |
| H | 4.50969300  | 1.92658300  | -0.24483700 |
| C | -0.72071400 | 2.06161900  | 0.00713400  |
| C | -1.43780800 | 3.27008300  | -0.02227600 |
| C | -2.84673000 | 3.17285100  | -0.08865300 |
| C | -3.45483300 | 1.93509600  | -0.15151900 |
| H | -3.45168500 | 4.07480200  | -0.10893700 |
| H | -4.53200200 | 1.83667400  | -0.23026700 |
| N | -1.31964800 | 0.84683400  | -0.01248400 |
| C | 1.39849900  | 3.29051600  | -0.01094500 |
| C | 3.22555400  | -0.51810700 | -0.25149900 |
| H | 5.47656400  | -0.46333000 | -0.44801700 |
| C | -2.65820500 | 0.78566700  | -0.12274100 |
| C | -3.19168100 | -0.56420500 | -0.23695600 |
| N | -2.36284600 | -1.67081300 | -0.19808100 |
| N | 2.40131100  | -1.59378400 | -0.25265500 |
| N | 1.31895200  | 0.86190800  | -0.03445200 |

|    |             |             |             |
|----|-------------|-------------|-------------|
| C  | 2.80667000  | 3.21498200  | -0.08325700 |
| H  | 3.39918800  | 4.12525500  | -0.09555200 |
| N  | 4.48981200  | -2.31395300 | -0.48531200 |
| C  | 4.53323900  | -0.98747000 | -0.39707500 |
| C  | 0.65478400  | 4.50866600  | 0.00085000  |
| H  | 1.19141400  | 5.45200500  | -0.00744500 |
| C  | -0.71249500 | 4.49944100  | -0.00244900 |
| H  | -1.26209500 | 5.43530400  | -0.00334100 |
| N  | 3.23680800  | -2.62178000 | -0.39271300 |
| H  | 2.93938100  | -3.58755900 | -0.45878600 |
| C  | -3.21194900 | -2.68821800 | -0.37251600 |
| H  | -2.97845500 | -3.74348600 | -0.41002900 |
| N  | -4.43797500 | -2.19468600 | -0.49840900 |
| H  | -5.30742300 | -2.69838600 | -0.64322100 |
| N  | -4.44985800 | -0.86388000 | -0.41568400 |
| Am | 0.00867500  | -1.12242400 | 0.32456200  |

AmR<sub>5</sub>PhR<sub>8</sub><sup>3+</sup>(PBE0/6-311G\*-RECP)

|   |             |             |             |
|---|-------------|-------------|-------------|
| C | -0.64563000 | 2.09222100  | -0.00010200 |
| C | -2.64025300 | 0.89576700  | 0.00073300  |
| C | -3.38097700 | 2.08354200  | 0.00064000  |
| H | -4.46442800 | 2.05019300  | 0.00102700  |
| C | 0.77721900  | 2.05819700  | 0.00007300  |
| C | 1.51084100  | 3.26398900  | 0.00019600  |
| C | 2.91472500  | 3.15612100  | 0.00076500  |
| C | 3.51417300  | 1.91134800  | 0.00135100  |
| H | 3.52798700  | 4.05253700  | 0.00082100  |
| H | 4.59577700  | 1.83229500  | 0.00187400  |
| N | 1.36493300  | 0.83863700  | 0.00035300  |
| C | -1.31290600 | 3.33042800  | -0.00017500 |
| C | -3.26747800 | -0.41713300 | 0.00161300  |
| H | -5.52240000 | -0.27102500 | 0.00304500  |
| C | 2.70898100  | 0.77071200  | 0.00113800  |
| H | 5.32289100  | -0.61581600 | 0.00290200  |
| C | 3.19737400  | -0.59886500 | 0.00169100  |
| N | 2.33912400  | -1.63769300 | 0.00120900  |
| N | -2.49159400 | -1.52738600 | 0.00144800  |
| N | -1.29412700 | 0.89853500  | 0.00017800  |
| C | -2.72269800 | 3.29483900  | 0.00012100  |
| H | -3.28945700 | 4.22138500  | 0.00005100  |
| N | -4.61784000 | -2.16378300 | 0.00326200  |
| C | -4.59977300 | -0.83308600 | 0.00264200  |
| C | -0.54988100 | 4.54000700  | -0.00033600 |

|    |             |             |             |
|----|-------------|-------------|-------------|
| H  | -1.07498900 | 5.48974400  | -0.00052900 |
| C  | 0.81027300  | 4.50880200  | -0.00012300 |
| H  | 1.37993500  | 5.43238200  | -0.00015800 |
| N  | -3.37840800 | -2.52640400 | 0.00246400  |
| H  | -3.12967400 | -3.50831000 | 0.00295500  |
| N  | 4.42908300  | -1.09428200 | 0.00241400  |
| C  | 3.15900900  | -2.74427800 | 0.00199000  |
| H  | 2.81864300  | -3.77061100 | 0.00197000  |
| N  | 4.42408400  | -2.43296900 | 0.00264800  |
| Am | -0.02556900 | -1.17127400 | -0.00194900 |

AmR<sub>6</sub>PhR<sub>6</sub><sup>3+</sup>(PBE0/6-311G\*-RECP)

|   |             |             |             |
|---|-------------|-------------|-------------|
| C | -0.71636300 | 2.07221300  | -0.04321200 |
| C | -2.66492700 | 0.81378900  | 0.18009800  |
| C | -3.44390500 | 1.97292500  | 0.23920200  |
| H | -4.51892800 | 1.92080600  | 0.37183700  |
| C | 0.71625000  | 2.07224600  | -0.04317600 |
| C | 1.41840900  | 3.29113600  | 0.01510100  |
| C | 2.82213000  | 3.20488500  | 0.13265900  |
| C | 3.44378300  | 1.97308500  | 0.23936500  |
| H | 3.41789600  | 4.11232700  | 0.17084900  |
| H | 4.51880100  | 1.92101700  | 0.37206000  |
| N | 1.33443900  | 0.87239100  | -0.00123400 |
| C | -1.41858200 | 3.29107100  | 0.01502500  |
| C | -3.12430100 | -0.56525600 | 0.33672200  |
| H | -5.22153800 | -0.64130800 | 0.66559000  |
| H | -4.92057100 | -3.17936200 | 0.81796300  |
| C | 2.66486800  | 0.81391100  | 0.18019500  |
| H | 5.22157900  | -0.64104500 | 0.66553900  |
| H | 4.92078000  | -3.17913000 | 0.81777500  |
| C | 3.12432300  | -0.56511000 | 0.33676300  |
| N | 2.24284600  | -1.56425400 | 0.28532200  |
| N | -2.24274000 | -1.56433600 | 0.28541100  |
| N | -1.33449800 | 0.87233600  | -0.00128700 |
| C | -2.82230500 | 3.20475300  | 0.13250500  |
| H | -3.41811700 | 4.11216700  | 0.17064900  |
| N | -2.87002100 | -2.74592700 | 0.46746400  |
| N | 2.87020500  | -2.74581600 | 0.46728500  |
| C | -4.13136000 | -2.46168100 | 0.63905200  |
| C | 4.13152100  | -2.46148900 | 0.63891400  |
| N | -4.32987600 | -1.11065400 | 0.56265600  |
| N | 4.32994900  | -1.11044600 | 0.56257700  |
| C | 0.68144900  | 4.51748400  | 0.00055700  |
| H | 1.22472300  | 5.45685100  | 0.01758800  |

|    |             |             |             |
|----|-------------|-------------|-------------|
| C  | -0.68167900 | 4.51745300  | 0.00051900  |
| H  | -1.22499700 | 5.45679500  | 0.01751900  |
| Am | 0.00002500  | -1.11379600 | -0.42617300 |

AmR<sub>6</sub>PhR<sub>7</sub><sup>3+</sup>(PBE0/6-311G\*-RECP)

|    |             |             |             |
|----|-------------|-------------|-------------|
| C  | 0.83373800  | 2.05906300  | -0.00015600 |
| C  | 2.75885400  | 0.76802800  | -0.00062300 |
| C  | 3.57287100  | 1.89956500  | -0.00075100 |
| H  | 4.65378700  | 1.81212300  | -0.00102800 |
| C  | -0.59210900 | 2.10358000  | 0.00002700  |
| C  | -1.24910000 | 3.34706100  | 0.00021600  |
| C  | -2.66042900 | 3.33128100  | 0.00035800  |
| C  | -3.33478900 | 2.13011100  | 0.00016500  |
| H  | -3.21306500 | 4.26620100  | 0.00054000  |
| H  | -4.41834500 | 2.08603100  | 0.00017300  |
| N  | -1.25497200 | 0.91705500  | -0.00007900 |
| C  | 1.57661300  | 3.26297900  | -0.00021500 |
| C  | 3.20789800  | -0.61705100 | -0.00072500 |
| H  | 5.32097300  | -0.81553400 | -0.00061400 |
| H  | 4.90111400  | -3.34438700 | -0.00020900 |
| C  | -2.59832400 | 0.94123500  | -0.00010400 |
| H  | -5.51289000 | -2.36889400 | -0.00145800 |
| C  | -3.23432900 | -0.36735100 | -0.00054900 |
| N  | -2.48082900 | -1.52317500 | -0.00104100 |
| N  | 2.27970800  | -1.56535900 | -0.00068500 |
| N  | 1.41347600  | 0.84134000  | -0.00031600 |
| C  | 2.97807100  | 3.14838300  | -0.00052100 |
| H  | 3.59503000  | 4.04208100  | -0.00061000 |
| N  | 2.84947000  | -2.79070100 | -0.00039100 |
| C  | 4.13529600  | -2.58046800 | -0.00035200 |
| N  | 4.39812900  | -1.23392500 | -0.00055200 |
| C  | -0.47554600 | 4.55106500  | 0.00021300  |
| H  | -0.99453400 | 5.50413100  | 0.00038200  |
| C  | 0.88370000  | 4.51191200  | -0.00001200 |
| H  | 1.45888800  | 5.43198900  | -0.00004500 |
| C  | -3.40557900 | -2.49122300 | -0.00122600 |
| H  | -3.24298200 | -3.56055900 | -0.00164700 |
| N  | -4.60233000 | -1.92014800 | -0.00119600 |
| N  | -4.52065200 | -0.58730300 | -0.00063400 |
| Am | -0.03687400 | -1.20007000 | 0.00067700  |

AmR<sub>6</sub>PhR<sub>8</sub><sup>3+</sup>(PBE0/6-311G\*-RECP)

|    |             |             |             |
|----|-------------|-------------|-------------|
| C  | -0.78985400 | 2.07650500  | 0.00005000  |
| C  | -2.73529000 | 0.81786900  | 0.00031900  |
| C  | -3.53069000 | 1.96356600  | 0.00081300  |
| H  | -4.61294700 | 1.89410500  | 0.00116400  |
| C  | 0.64000000  | 2.10089600  | -0.00010500 |
| C  | 1.31338400  | 3.33979000  | -0.00027700 |
| C  | 2.72118700  | 3.30399900  | -0.00060300 |
| C  | 3.38022000  | 2.09191500  | -0.00050800 |
| H  | 3.28809200  | 4.23033500  | -0.00086200 |
| H  | 4.46433700  | 2.06643100  | -0.00065000 |
| N  | 1.28678000  | 0.91107600  | 0.00000100  |
| C  | -1.51175900 | 3.29142000  | 0.00036000  |
| C  | -3.21320600 | -0.55838500 | 0.00023900  |
| H  | -5.33121200 | -0.70934600 | 0.00077900  |
| H  | -4.96819200 | -3.24642900 | 0.00009700  |
| C  | 2.63184300  | 0.91169500  | -0.00009700 |
| C  | 3.20509900  | -0.42627500 | 0.00033700  |
| N  | 2.42511300  | -1.52282300 | 0.00138300  |
| N  | -2.30742000 | -1.52736600 | -0.00008300 |
| N  | -1.38944800 | 0.86854600  | -0.00003300 |
| C  | -2.91570000 | 3.20157500  | 0.00080900  |
| H  | -3.51713800 | 4.10582900  | 0.00115600  |
| N  | -2.90428300 | -2.73862400 | -0.00023400 |
| C  | -4.18559700 | -2.49957100 | 0.00006000  |
| N  | -4.41766400 | -1.14786900 | 0.00044000  |
| C  | 0.55805800  | 4.55464500  | -0.00010600 |
| H  | 1.08955500  | 5.50077500  | -0.00023600 |
| C  | -0.80095600 | 4.53190300  | 0.00024200  |
| H  | -1.36440200 | 5.45934000  | 0.00043500  |
| C  | 3.31929300  | -2.56753100 | 0.00157100  |
| H  | 3.04987500  | -3.61473700 | 0.00244100  |
| N  | 4.47038100  | -0.83309900 | 0.00020700  |
| H  | 5.32808300  | -0.29320100 | -0.00065800 |
| N  | 4.56058000  | -2.16775800 | 0.00090900  |
| Am | 0.02094200  | -1.21149200 | -0.00042600 |

AmR<sub>7</sub>PhR<sub>7</sub><sup>3+</sup>(PBE0/6-311G\*-RECP)

|   |             |            |             |
|---|-------------|------------|-------------|
| C | 0.70983000  | 2.06898400 | -0.00005500 |
| C | 2.66884400  | 0.82633100 | 0.00012600  |
| C | 3.45041500  | 1.98454100 | 0.00022200  |
| H | 4.53144800  | 1.89856500 | 0.00034200  |
| C | -0.70982500 | 2.06898200 | -0.00005000 |

|    |             |             |             |
|----|-------------|-------------|-------------|
| C  | -1.41412600 | 3.28737700  | -0.00000300 |
| C  | -2.82336600 | 3.21308200  | 0.00009200  |
| C  | -3.45041100 | 1.98454100  | 0.00019300  |
| H  | -3.41406400 | 4.12448100  | 0.00012000  |
| H  | -4.53144300 | 1.89856400  | 0.00031700  |
| N  | -1.32506800 | 0.85757800  | -0.00000700 |
| C  | 1.41413100  | 3.28737900  | -0.00000500 |
| C  | 3.23876200  | -0.51119700 | 0.00026600  |
| C  | -2.66883900 | 0.82633000  | 0.00016800  |
| C  | -3.23876700 | -0.51119400 | 0.00035100  |
| N  | -2.42063800 | -1.62455300 | 0.00002400  |
| N  | 2.42063000  | -1.62455100 | 0.00001100  |
| N  | 1.32507100  | 0.85758100  | -0.00001900 |
| C  | 2.82337000  | 3.21308400  | 0.00012300  |
| H  | 3.41407000  | 4.12448200  | 0.00017800  |
| C  | 3.29211100  | -2.64192200 | 0.00032600  |
| H  | 3.07331000  | -3.70102300 | 0.00030800  |
| C  | -3.29212800 | -2.64191600 | 0.00044100  |
| H  | -3.07333600 | -3.70101900 | 0.00044600  |
| C  | 0.68059700  | 4.51373500  | -0.00000400 |
| H  | 1.22743200  | 5.45099500  | 0.00001600  |
| C  | -0.68059400 | 4.51373400  | -0.00003500 |
| H  | -1.22743000 | 5.45099300  | -0.00002700 |
| N  | 4.51034500  | -0.80238400 | 0.00066700  |
| N  | -4.51035100 | -0.80237000 | 0.00058100  |
| N  | -4.51787900 | -2.13798200 | 0.00075200  |
| H  | -5.40248600 | -2.63606800 | 0.00103300  |
| N  | 4.51786500  | -2.13799600 | 0.00076800  |
| H  | 5.40246800  | -2.63608900 | 0.00114800  |
| Am | 0.00000200  | -1.17118300 | -0.00038200 |

AmR<sub>7</sub>PhR<sub>8</sub><sup>3+</sup>(PBE0/6-311G\*-RECP)

|   |             |            |             |
|---|-------------|------------|-------------|
| C | -0.66525600 | 2.08403000 | 0.00000500  |
| C | -2.64363500 | 0.87516200 | -0.00003600 |
| C | -3.40666100 | 2.04693300 | -0.00006500 |
| H | -4.48903100 | 1.97868700 | -0.00011500 |
| C | 0.75771000  | 2.06413600 | -0.00001700 |
| C | 1.47841900  | 3.27768100 | 0.00001300  |
| C | 2.88320000  | 3.18406200 | -0.00004400 |
| C | 3.49498600  | 1.94537300 | -0.00010500 |
| H | 3.48744500  | 4.08651900 | -0.00004300 |
| H | 4.57730000  | 1.87730300 | -0.00019400 |
| N | 1.35702500  | 0.85069900 | -0.00006500 |



|    |             |             |             |
|----|-------------|-------------|-------------|
| C  | -1.34864100 | 3.31309900  | 0.00002000  |
| C  | -3.23985600 | -0.45127800 | -0.00005500 |
| C  | 2.70113900  | 0.79657300  | -0.00010100 |
| C  | 3.20482100  | -0.56778800 | -0.00007800 |
| N  | 2.36125400  | -1.61839800 | 0.00001000  |
| N  | -2.44659300 | -1.58167000 | -0.00011800 |
| N  | -1.30018200 | 0.88333900  | 0.00000600  |
| C  | -2.75962400 | 3.26403000  | -0.00002400 |
| H  | -3.33426700 | 4.18565600  | -0.00003100 |
| C  | -3.33959800 | -2.58009600 | -0.00010100 |
| H  | -3.14337700 | -3.64374700 | -0.00012900 |
| C  | 3.19650900  | -2.71287600 | -0.00000200 |
| H  | 2.86987000  | -3.74357900 | 0.00003900  |
| C  | -0.59743200 | 4.53030800  | 0.00006800  |
| H  | -1.13227900 | 5.47458000  | 0.00010600  |
| C  | 0.76320600  | 4.51405000  | 0.00007000  |
| H  | 1.32215700  | 5.44412100  | 0.00011500  |
| N  | -4.51754000 | -0.71454000 | -0.00007300 |
| N  | -4.55436700 | -2.04942100 | -0.00012700 |
| H  | -5.44965200 | -2.52839100 | -0.00015100 |
| N  | 4.45742000  | -2.38482400 | -0.00008200 |
| N  | 4.44355300  | -1.04612600 | -0.00014000 |
| H  | 5.33019200  | -0.55494900 | -0.00018400 |
| Am | -0.01598000 | -1.18368400 | 0.00007800  |

AmR<sub>8</sub>PhR<sub>8</sub><sup>3+</sup>(PBE0/6-311G\*-RECP)

|   |             |             |             |
|---|-------------|-------------|-------------|
| C | 0.71326000  | 2.08001300  | -0.00025900 |
| C | 2.67653400  | 0.84495000  | -0.00046100 |
| C | 3.45153600  | 2.00766200  | -0.00006400 |
| H | 4.53486400  | 1.95773900  | 0.00021200  |
| C | -0.71333400 | 2.07999500  | -0.00026500 |
| C | -1.41308200 | 3.30420300  | -0.00007900 |
| C | -2.81994500 | 3.23520200  | 0.00003300  |
| C | -3.45161000 | 2.00756700  | -0.00004500 |
| H | -3.40864800 | 4.14791100  | 0.00024100  |
| H | -4.53493500 | 1.95759900  | 0.00003900  |
| N | -1.33212600 | 0.87662900  | -0.00035200 |
| C | 1.41297100  | 3.30423600  | 0.00007900  |
| C | 3.20812700  | -0.50953700 | -0.00055600 |
| H | 5.33366200  | -0.44997800 | -0.00085700 |
| C | -2.67655900 | 0.84488300  | -0.00033700 |
| H | -5.33364800 | -0.45009400 | -0.00103800 |
| C | -3.20811900 | -0.50962000 | -0.00035100 |
| N | -2.38887900 | -1.57871800 | 0.00014800  |

|    |             |             |             |
|----|-------------|-------------|-------------|
| N  | 2.38891300  | -1.57865700 | -0.00021600 |
| N  | 1.33208300  | 0.87665100  | -0.00057400 |
| C  | 2.81983700  | 3.23528000  | 0.00020100  |
| H  | 3.40850500  | 4.14801200  | 0.00054700  |
| N  | 4.45766100  | -0.96009500 | -0.00053900 |
| N  | -4.45764300 | -0.96020500 | -0.00064800 |
| C  | 3.24773000  | -2.65405200 | -0.00048700 |
| H  | 2.94406400  | -3.69184700 | -0.00037500 |
| C  | -3.24767500 | -2.65412000 | 0.00005300  |
| H  | -2.94398100 | -3.69190700 | 0.00040400  |
| N  | 4.50146800  | -2.29732200 | -0.00025200 |
| N  | -4.50143100 | -2.29743300 | -0.00076400 |
| C  | 0.68001400  | 4.53183400  | 0.00027400  |
| H  | 1.22710000  | 5.46905300  | 0.00051000  |
| C  | -0.68015800 | 4.53181900  | 0.00015100  |
| H  | -1.22726600 | 5.46902500  | 0.00025700  |
| Am | 0.00003000  | -1.19487800 | 0.00037000  |

EuR<sub>1</sub>PhR<sub>1</sub><sup>3+</sup>(PBE0/6-311G\*-RECP)

|   |             |             |             |
|---|-------------|-------------|-------------|
| C | -0.73325800 | 1.90204300  | -0.00005300 |
| C | -2.71857600 | 0.70465300  | 0.00019300  |
| C | -3.48101100 | 1.88779800  | 0.00022600  |
| H | -4.56287500 | 1.84123900  | 0.00035900  |
| C | 0.73325800  | 1.90204300  | -0.00004900 |
| C | 1.42680100  | 3.14288400  | -0.00001000 |
| C | 2.84210300  | 3.10012200  | 0.00008900  |
| C | 3.48101100  | 1.88779800  | 0.00022300  |
| H | 3.41218800  | 4.02442400  | 0.00009300  |
| H | 4.56287500  | 1.84123900  | 0.00034600  |
| N | 1.36193700  | 0.72936300  | 0.00000200  |
| C | -1.42680100 | 3.14288400  | -0.00001100 |
| C | -3.35229600 | -0.59748100 | 0.00046400  |
| C | -4.72473500 | -0.90639300 | 0.00091700  |
| H | -5.57373300 | -0.24031900 | 0.00108400  |
| C | -4.77663500 | -2.28118200 | 0.00111600  |
| H | -5.61074500 | -2.96873000 | 0.00144000  |
| H | -3.20901400 | -3.68027500 | 0.00069400  |
| C | 2.71857500  | 0.70465300  | 0.00021000  |
| C | 4.72473500  | -0.90639300 | 0.00081700  |
| C | 4.77663600  | -2.28118200 | 0.00107800  |
| H | 5.57373300  | -0.24031900 | 0.00090200  |
| H | 3.20901400  | -3.68027500 | 0.00099700  |
| H | 5.61074500  | -2.96873000 | 0.00140300  |

|    |             |             |             |
|----|-------------|-------------|-------------|
| C  | 3.35229600  | -0.59748100 | 0.00046800  |
| N  | 2.60652600  | -1.73161400 | 0.00047400  |
| N  | -2.60652600 | -1.73161400 | 0.00046200  |
| N  | -1.36193700 | 0.72936300  | -0.00000900 |
| C  | -2.84210300 | 3.10012200  | 0.00009500  |
| H  | -3.41218800 | 4.02442400  | 0.00010500  |
| N  | -3.50228600 | -2.71333300 | 0.00070900  |
| N  | 3.50228600  | -2.71333300 | 0.00085200  |
| C  | 0.70015300  | 4.34508400  | -0.00004700 |
| H  | 1.23128600  | 5.29263700  | -0.00005300 |
| C  | -0.70015300 | 4.34508400  | -0.00004600 |
| H  | -1.23128700 | 5.29263700  | -0.00005100 |
| Eu | 0.00000000  | -1.46174800 | -0.00093400 |

EuR<sub>1</sub>PhR<sub>2</sub><sup>3+</sup>(PBE0/6-311G\*-RECP)

|   |             |             |             |
|---|-------------|-------------|-------------|
| C | 0.75960400  | 1.89362400  | 0.00356200  |
| C | 2.73432000  | 0.67806700  | -0.01781300 |
| C | 3.51185500  | 1.85943300  | -0.02106400 |
| H | 4.59382600  | 1.80560600  | -0.03193700 |
| C | -0.70509100 | 1.90918700  | 0.00386200  |
| C | -1.37970200 | 3.15274800  | 0.00023600  |
| C | -2.79216600 | 3.12820800  | -0.00848400 |
| C | -3.44757000 | 1.92220600  | -0.01969000 |
| H | -3.35173700 | 4.05885300  | -0.00939400 |
| H | -4.52990800 | 1.89053500  | -0.03072900 |
| N | -1.34931300 | 0.74017600  | -0.00019100 |
| C | 1.46934300  | 3.13324700  | -0.00083400 |
| C | 3.32998700  | -0.62548800 | -0.03780800 |
| C | 4.68184200  | -0.96708000 | -0.07395200 |
| H | 5.58307800  | -0.37181500 | -0.09069400 |
| H | 5.55251000  | -2.88175600 | -0.11618500 |
| C | -2.70216000 | 0.73068600  | -0.01783800 |
| C | -4.73108000 | -0.85385200 | -0.07106300 |
| C | -4.80382200 | -2.22890800 | -0.09058900 |
| H | -5.56993900 | -0.17529300 | -0.07990600 |
| H | -3.25860900 | -3.65129900 | -0.08110300 |
| H | -5.64880100 | -2.90231300 | -0.11719400 |
| C | -3.35682500 | -0.56667600 | -0.04004800 |
| N | -2.62876700 | -1.70927900 | -0.04004500 |
| N | 2.57460900  | -1.78981700 | -0.03156800 |
| N | 1.37622200  | 0.71560000  | 0.00046700  |
| C | 2.88693700  | 3.07299600  | -0.01019000 |
| H | 3.46479300  | 3.99221900  | -0.01147800 |

|    |             |             |             |
|----|-------------|-------------|-------------|
| N  | -3.53891700 | -2.68123000 | -0.07057600 |
| C  | -0.63472600 | 4.35258800  | 0.00288700  |
| H  | -1.15901800 | 5.30392100  | 0.00332200  |
| C  | 0.76009600  | 4.34053200  | 0.00218500  |
| H  | 1.30178100  | 5.28161900  | 0.00188500  |
| C  | 3.43960400  | -2.77677200 | -0.06280200 |
| H  | 3.21235100  | -3.83401800 | -0.06832700 |
| N  | 4.71529900  | -2.31079600 | -0.08907600 |
| Eu | -0.03741200 | -1.46344900 | 0.07945000  |

EuR<sub>1</sub>PhR<sub>3</sub><sup>3+</sup>(PBE0/6-311G\*-RECP)

|   |             |             |             |
|---|-------------|-------------|-------------|
| C | 0.80589400  | 1.86836100  | 0.00064800  |
| C | 2.75396200  | 0.61584700  | -0.00343500 |
| C | 3.55819900  | 1.77555500  | -0.00407200 |
| H | 4.64027200  | 1.71241700  | -0.00606100 |
| C | -0.65569300 | 1.91460700  | 0.00076600  |
| C | -1.30020200 | 3.17211700  | 0.00029400  |
| C | -2.71239900 | 3.17967400  | -0.00129300 |
| C | -3.39535400 | 1.98926100  | -0.00350500 |
| H | -3.25070900 | 4.12273900  | -0.00130000 |
| H | -4.47821200 | 1.98281400  | -0.00549400 |
| N | -1.32756400 | 0.75830100  | -0.00016900 |
| C | 1.54288100  | 3.09448200  | -0.00008400 |
| C | 3.29320200  | -0.71085200 | -0.00712000 |
| H | 5.40870900  | -0.42415800 | -0.01670900 |
| C | 4.71593100  | -2.39089300 | -0.01671300 |
| H | 5.66378800  | -2.91132300 | -0.02216300 |
| H | 3.08533100  | -3.90108400 | -0.01147100 |
| C | -2.67821800 | 0.78005800  | -0.00333300 |
| C | -4.74613900 | -0.75505000 | -0.01343400 |
| C | -4.85317200 | -2.12844100 | -0.01697000 |
| H | -5.56811700 | -0.05610200 | -0.01527500 |
| H | -3.34454600 | -3.58927800 | -0.01448900 |
| H | -5.71510800 | -2.78057900 | -0.02195000 |
| C | -3.36589500 | -0.50183500 | -0.00749100 |
| N | -2.66614500 | -1.66209900 | -0.00746300 |
| N | 2.54308500  | -1.83373600 | -0.00558100 |
| N | 1.39814500  | 0.67934500  | -0.00003000 |
| C | 2.95580600  | 3.00369100  | -0.00192100 |
| H | 3.55386800  | 3.90988600  | -0.00210700 |
| N | -3.60046100 | -2.61249000 | -0.01292500 |
| C | -0.52814300 | 4.35882000  | 0.00091800  |
| H | -1.03511500 | 5.31943700  | 0.00116600  |
| C | 0.85989500  | 4.31981400  | 0.00070400  |

|    |             |             |             |
|----|-------------|-------------|-------------|
| H  | 1.42299200  | 5.24800600  | 0.00077600  |
| C  | 3.40021400  | -2.86697400 | -0.01124100 |
| N  | 4.61527200  | -1.05203200 | -0.01379300 |
| Eu | -0.07974700 | -1.47433800 | 0.01457900  |

EuR<sub>1</sub>PhR<sub>4</sub><sup>3+</sup>(PBE0/6-311G\*-RECP)

|    |             |             |             |
|----|-------------|-------------|-------------|
| C  | -0.77587800 | 1.90506700  | 0.00000300  |
| C  | -2.75609100 | 0.70346900  | 0.00151500  |
| C  | -3.52681600 | 1.87766600  | 0.00227700  |
| H  | -4.60940300 | 1.82670200  | 0.00339100  |
| C  | 0.69240500  | 1.91315900  | -0.00042700 |
| C  | 1.37619000  | 3.16301700  | -0.00030300 |
| C  | 2.79288500  | 3.13488600  | -0.00047900 |
| C  | 3.44310800  | 1.93051400  | -0.00025900 |
| H  | 3.35274100  | 4.06540000  | -0.00043800 |
| H  | 4.52529500  | 1.89452600  | -0.00003700 |
| N  | 1.33315700  | 0.74722000  | -0.00046600 |
| C  | -1.47624600 | 3.14034800  | 0.00062300  |
| C  | -3.34818400 | -0.61643200 | 0.00206700  |
| C  | -4.66020400 | -1.06182300 | 0.00314400  |
| H  | -5.61867900 | -0.56410300 | 0.00417100  |
| H  | -5.27856300 | -3.09270000 | 0.00389200  |
| C  | 2.69224800  | 0.73836800  | 0.00006200  |
| C  | 4.72648700  | -0.83593800 | 0.00105600  |
| C  | 4.80359400  | -2.20896600 | 0.00407700  |
| H  | 5.56351200  | -0.15485800 | -0.00186700 |
| H  | 3.25979400  | -3.63662100 | 0.01070400  |
| H  | 5.64977200  | -2.88166300 | 0.00468700  |
| C  | 3.34686000  | -0.55158100 | 0.00171100  |
| N  | 2.62350200  | -1.70081700 | 0.00578000  |
| N  | -2.55275200 | -1.73127500 | 0.00078700  |
| N  | -1.39981600 | 0.72947800  | 0.00016000  |
| C  | -2.89017700 | 3.09330100  | 0.00166500  |
| H  | -3.46317200 | 4.01583000  | 0.00209600  |
| N  | 3.53621700  | -2.66411000 | 0.00671100  |
| C  | 0.64342600  | 4.35889800  | -0.00005900 |
| H  | 1.16866800  | 5.30968400  | -0.00014700 |
| C  | -0.75619100 | 4.34967700  | 0.00045800  |
| H  | -1.29412000 | 5.29347900  | 0.00086200  |
| N  | -3.27920300 | -2.79695900 | 0.00259000  |
| N  | -4.54089200 | -2.39573700 | 0.00304400  |
| Eu | 0.01171700  | -1.48558800 | -0.00413200 |

EuR<sub>1</sub>PhR<sub>5</sub><sup>3+</sup>(PBE0/6-311G\*-RECP)

|    |             |             |             |
|----|-------------|-------------|-------------|
| C  | -0.74813500 | 1.89537600  | -0.00012000 |
| C  | -2.72701800 | 0.69148500  | 0.00006700  |
| C  | -3.49641800 | 1.86682100  | -0.00001500 |
| H  | -4.57864300 | 1.81543400  | 0.00004500  |
| C  | 0.71921100  | 1.90312400  | -0.00003400 |
| C  | 1.40699800  | 3.15087800  | 0.00013500  |
| C  | 2.82395400  | 3.11697900  | 0.00038300  |
| C  | 3.46996800  | 1.90971300  | 0.00048200  |
| H  | 3.38761800  | 4.04527600  | 0.00051500  |
| H  | 4.55212100  | 1.86971500  | 0.00072400  |
| N  | 1.35545000  | 0.73579500  | -0.00002900 |
| C  | -1.44730100 | 3.13029600  | -0.00014000 |
| C  | -3.35433700 | -0.61479300 | 0.00040200  |
| C  | -4.71424300 | -0.97601200 | 0.00076300  |
| H  | -5.61243000 | -0.37583300 | 0.00077700  |
| H  | -3.33589400 | -3.68583600 | 0.00121000  |
| C  | 2.71441900  | 0.72091800  | 0.00026300  |
| C  | 4.73233400  | -0.87405100 | 0.00065500  |
| C  | 4.79390300  | -2.24825900 | 0.00075800  |
| H  | 5.57681500  | -0.20208600 | 0.00068100  |
| H  | 3.23646800  | -3.65889700 | 0.00060500  |
| H  | 5.63262500  | -2.93039600 | 0.00099300  |
| C  | 3.35658700  | -0.57449700 | 0.00037000  |
| N  | 2.61907600  | -1.71531300 | 0.00032100  |
| N  | -2.62944300 | -1.75652600 | 0.00054900  |
| N  | -1.37202500 | 0.71856000  | -0.00007600 |
| C  | -2.86082300 | 3.08369400  | -0.00014800 |
| H  | -3.43509800 | 4.00552100  | -0.00021300 |
| N  | 3.52194900  | -2.68909400 | 0.00053900  |
| C  | 0.67617200  | 4.34744900  | 0.00007900  |
| H  | 1.20137600  | 5.29833900  | 0.00018600  |
| C  | -0.72513900 | 4.33907500  | -0.00009000 |
| H  | -1.26179100 | 5.28372100  | -0.00015300 |
| N  | -3.55157000 | -2.69647900 | 0.00094300  |
| N  | -4.79252600 | -2.29758500 | 0.00114800  |
| Eu | 0.01364600  | -1.47253400 | -0.00082500 |

EuR<sub>1</sub>PhR<sub>6</sub><sup>3+</sup>(PBE0/6-311G\*-RECP)

|   |             |            |             |
|---|-------------|------------|-------------|
| C | 0.80731300  | 1.89528600 | -0.00531600 |
| C | 2.76442000  | 0.66400800 | 0.04602900  |
| C | 3.55595100  | 1.81886100 | 0.06282000  |
| H | 4.63809000  | 1.76044400 | 0.09275100  |
| C | -0.65866800 | 1.92079400 | -0.01391400 |
| C | -1.32499400 | 3.18013200 | -0.01266600 |

|    |             |             |             |
|----|-------------|-------------|-------------|
| C  | -2.74229000 | 3.16851800  | -0.00574300 |
| C  | -3.40635100 | 1.97234100  | 0.01566200  |
| H  | -3.29141600 | 4.10538700  | -0.01069400 |
| H  | -4.48888400 | 1.94981600  | 0.03005900  |
| N  | -1.31201500 | 0.76151400  | -0.00694500 |
| C  | 1.52641300  | 3.11948900  | 0.00968000  |
| C  | 3.28809400  | -0.68863000 | 0.07723000  |
| H  | 5.42155100  | -0.61892500 | 0.17948300  |
| C  | 4.46670800  | -2.49995500 | 0.14968900  |
| H  | 5.31672000  | -3.16690300 | 0.19648900  |
| C  | -2.67032900 | 0.76939600  | 0.02162200  |
| C  | -4.72100100 | -0.77894400 | 0.13485000  |
| C  | -4.81298300 | -2.14968500 | 0.18311300  |
| H  | -5.54968900 | -0.08782100 | 0.14884700  |
| H  | -3.28558900 | -3.59614000 | 0.17068800  |
| H  | -5.66547000 | -2.81198500 | 0.24092300  |
| C  | -3.33916300 | -0.51103100 | 0.07050500  |
| N  | -2.62858600 | -1.67045100 | 0.07770600  |
| N  | 2.47959700  | -1.74394700 | 0.04893900  |
| N  | 1.41183000  | 0.71245200  | 0.00310300  |
| C  | 2.93559100  | 3.04834600  | 0.03960900  |
| H  | 3.52541700  | 3.96021100  | 0.04929500  |
| N  | -3.55085400 | -2.62051200 | 0.14574100  |
| C  | -0.57516400 | 4.36739700  | -0.01360900 |
| H  | -1.08912600 | 5.32425100  | -0.01883700 |
| C  | 0.82009700  | 4.34189000  | -0.00162300 |
| H  | 1.37044900  | 5.27839600  | 0.00263900  |
| N  | 3.20642900  | -2.86916600 | 0.09273300  |
| N  | 4.55933500  | -1.14665200 | 0.14120300  |
| Eu | -0.02450900 | -1.49029600 | -0.14518400 |

EuR<sub>1</sub>PhR<sub>7</sub><sup>3+</sup>(PBE0/6-311G\*-RECP)

|   |             |            |             |
|---|-------------|------------|-------------|
| C | -0.74334300 | 1.89287500 | 0.00018400  |
| C | -2.71054300 | 0.68482200 | -0.00126100 |
| C | -3.49658200 | 1.84690400 | -0.00177400 |
| H | -4.57744800 | 1.76294800 | -0.00270300 |
| C | 0.72206900  | 1.90334800 | 0.00037200  |
| C | 1.40674700  | 3.15372700 | 0.00031500  |
| C | 2.82417500  | 3.12194000 | 0.00005000  |
| C | 3.47117700  | 1.91558600 | -0.00063000 |
| H | 3.38666500  | 4.05090200 | 0.00018600  |
| H | 4.55333600  | 1.87689700 | -0.00111900 |
| N | 1.35836900  | 0.73655800 | 0.00013900  |
| C | -1.45106900 | 3.12079700 | -0.00025400 |

|    |             |             |             |
|----|-------------|-------------|-------------|
| C  | -3.31713400 | -0.63469000 | -0.00229700 |
| H  | -5.66486100 | -2.55420300 | -0.00611300 |
| H  | -3.41853700 | -3.80591300 | -0.00400200 |
| C  | 2.71712400  | 0.72473700  | -0.00078300 |
| C  | 4.73935600  | -0.86406700 | -0.00420800 |
| C  | 4.80555400  | -2.23746700 | -0.00561000 |
| H  | 5.58134300  | -0.18904700 | -0.00464900 |
| H  | 3.25129700  | -3.65252400 | -0.00523300 |
| H  | 5.64619900  | -2.91709100 | -0.00733100 |
| C  | 3.36182200  | -0.56882900 | -0.00228000 |
| N  | 2.62829500  | -1.71215200 | -0.00246000 |
| N  | -2.59962600 | -1.80658000 | -0.00197900 |
| N  | -1.36058400 | 0.71222700  | -0.00002600 |
| C  | -2.86564500 | 3.06747000  | -0.00110800 |
| H  | -3.44379500 | 3.98686200  | -0.00140500 |
| N  | 3.53423300  | -2.68204100 | -0.00446300 |
| C  | 0.67087700  | 4.34627100  | 0.00036100  |
| H  | 1.19169300  | 5.29951400  | 0.00050000  |
| C  | -0.73106000 | 4.33269500  | 0.00003800  |
| H  | -1.27042700 | 5.27580500  | -0.00010100 |
| N  | -4.62206200 | -0.81270700 | -0.00396700 |
| C  | -3.54748000 | -2.73247800 | -0.00357900 |
| N  | -4.74349200 | -2.13023400 | -0.00475600 |
| Eu | 0.00416400  | -1.48748400 | 0.00459300  |

EuR<sub>1</sub>PhR<sub>8</sub><sup>3+</sup>(PBE0/6-311G\*-RECP)

|   |             |             |             |
|---|-------------|-------------|-------------|
| C | -0.77368600 | 1.88962200  | 0.00408500  |
| C | -2.73543200 | 0.66458500  | -0.02490000 |
| C | -3.52130300 | 1.82602800  | -0.03231300 |
| H | -4.60398200 | 1.77432400  | -0.04821900 |
| C | 0.69280600  | 1.90975000  | 0.00706500  |
| C | 1.36663900  | 3.16609900  | 0.00482400  |
| C | 2.78436500  | 3.14639800  | -0.00192700 |
| C | 3.44155500  | 1.94627300  | -0.01533400 |
| H | 3.33872100  | 4.08024600  | -0.00039000 |
| H | 4.52400700  | 1.91728100  | -0.02595800 |
| N | 1.33895600  | 0.74825000  | 0.00255300  |
| C | -1.48653800 | 3.11588900  | -0.00322500 |
| C | -3.28970100 | -0.67570700 | -0.04669700 |
| H | -5.42183800 | -0.47041300 | -0.10997400 |
| H | -3.24098000 | -3.84481900 | -0.07377700 |
| C | 2.69823200  | 0.74787700  | -0.01674400 |
| C | 4.73723500  | -0.81744700 | -0.08525000 |
| C | 4.81832100  | -2.18942200 | -0.11235500 |



|    |             |             |             |
|----|-------------|-------------|-------------|
| H  | 5.57176800  | -0.13322300 | -0.09524300 |
| H  | 3.27956500  | -3.62245100 | -0.10200400 |
| H  | 5.66584600  | -2.85970700 | -0.14698700 |
| C  | 3.35633300  | -0.53755000 | -0.04572200 |
| N  | 2.63576000  | -1.69041600 | -0.04772100 |
| N  | -2.55002000 | -1.79621900 | -0.03456700 |
| N  | -1.38383900 | 0.70739600  | -0.00080800 |
| C  | -2.89718400 | 3.05183800  | -0.01853700 |
| H  | -3.48343400 | 3.96606700  | -0.02254700 |
| N  | 3.55159100  | -2.64854700 | -0.08800500 |
| C  | 0.62313600  | 4.35543400  | 0.00663900  |
| H  | 1.13985600  | 5.31090000  | 0.00862600  |
| C  | -0.77474600 | 4.33476200  | 0.00227900  |
| H  | -1.32090800 | 5.27385500  | 0.00077000  |
| N  | -4.71700800 | -2.35325700 | -0.10458000 |
| N  | -4.58331600 | -1.03783100 | -0.08852600 |
| C  | -3.47065500 | -2.78876500 | -0.07111300 |
| Eu | 0.01730500  | -1.48843900 | 0.09274000  |

EuR<sub>2</sub>PhR<sub>2</sub><sup>3+</sup>(PBE0/6-311G\*-RECP)

|   |             |             |             |
|---|-------------|-------------|-------------|
| C | 0.73296900  | 1.90239600  | 0.00154800  |
| C | 2.72115100  | 0.70653000  | -0.00687400 |
| C | 3.48144900  | 1.89575000  | -0.00792400 |
| H | 4.56399600  | 1.85586800  | -0.01208600 |
| C | -0.73294800 | 1.90239900  | 0.00160500  |
| C | -1.42389200 | 3.14440600  | 0.00002200  |
| C | -2.84026000 | 3.10273900  | -0.00340600 |
| C | -3.48142800 | 1.89576500  | -0.00759500 |
| H | -3.40724100 | 4.02870900  | -0.00385000 |
| H | -4.56397600 | 1.85588900  | -0.01166700 |
| N | -1.36442500 | 0.72875000  | 0.00025900  |
| C | 1.42392000  | 3.14440200  | -0.00005800 |
| C | 3.33814400  | -0.59279800 | -0.01485000 |
| C | 4.68901800  | -0.91570600 | -0.02930400 |
| H | 5.58334300  | -0.31052900 | -0.03641900 |
| H | 5.58528200  | -2.82197500 | -0.04583600 |
| H | 3.25860700  | -3.80357400 | -0.02590800 |
| C | -2.72113600 | 0.70654100  | -0.00668400 |
| C | -4.68902900 | -0.91567000 | -0.02812300 |
| H | -5.58336100 | -0.31048600 | -0.03350000 |
| H | -3.25863200 | -3.80354700 | -0.02889900 |
| H | -5.58532600 | -2.82192000 | -0.04504300 |
| C | -3.33813700 | -0.59278300 | -0.01484000 |
| N | -2.59653400 | -1.76615000 | -0.01366600 |

|    |             |             |             |
|----|-------------|-------------|-------------|
| N  | 2.59653700  | -1.76615700 | -0.01174900 |
| N  | 1.36444100  | 0.72874600  | 0.00022400  |
| C  | 2.84028700  | 3.10272800  | -0.00362900 |
| H  | 3.40727200  | 4.02869500  | -0.00400900 |
| C  | 3.47433500  | -2.74415900 | -0.02422100 |
| C  | -3.47435700 | -2.74413400 | -0.02573900 |
| N  | 4.74057200  | -2.26277400 | -0.03494100 |
| N  | -4.74059800 | -2.26273300 | -0.03479900 |
| C  | 0.69728700  | 4.34628200  | 0.00103500  |
| H  | 1.23012800  | 5.29253900  | 0.00103900  |
| C  | -0.69725400 | 4.34628400  | 0.00103600  |
| H  | -1.23009200 | 5.29254200  | 0.00095600  |
| Eu | -0.00001100 | -1.46707700 | 0.03041100  |

EuR<sub>2</sub>PhR<sub>3</sub><sup>3+</sup>(PBE0/6-311G\*-RECP)

|   |             |             |             |
|---|-------------|-------------|-------------|
| C | -0.68104400 | 1.91057900  | -0.00006000 |
| C | -2.69585000 | 0.76053400  | 0.00005600  |
| C | -3.42567200 | 1.96848900  | 0.00008600  |
| H | -4.50890900 | 1.95538800  | 0.00017600  |
| C | 0.78291000  | 1.87784800  | -0.00005600 |
| C | 1.50474500  | 3.10669700  | -0.00005500 |
| C | 2.91733700  | 3.03083800  | -0.00000600 |
| C | 3.53289700  | 1.80797300  | 0.00007500  |
| H | 3.50654600  | 3.94281400  | -0.00001900 |
| H | 4.61545500  | 1.75591900  | 0.00012800  |
| N | 1.38698400  | 0.69288100  | -0.00001300 |
| C | -1.33903200 | 3.16679500  | -0.00005700 |
| C | -3.34806200 | -0.52373800 | 0.00022000  |
| C | -4.70488400 | -0.81211100 | 0.00061900  |
| H | -5.58403700 | -0.18519700 | 0.00079000  |
| H | -5.64928300 | -2.69614200 | 0.00018100  |
| H | -3.34897000 | -3.73647800 | 0.00046600  |
| C | 2.74212600  | 0.64145100  | 0.00008500  |
| H | 5.40658700  | -0.37289000 | 0.00049000  |
| H | 3.12504500  | -3.87495100 | 0.00028300  |
| H | 5.69014500  | -2.85755900 | 0.00084000  |
| C | 3.29700400  | -0.68328800 | 0.00022800  |
| N | 2.56044500  | -1.81126900 | 0.00022100  |
| N | -2.63596400 | -1.71559800 | 0.00022900  |
| N | -1.34103000 | 0.74996000  | -0.00003200 |
| C | -2.75517400 | 3.15991800  | 0.00000200  |
| H | -3.29995100 | 4.09910800  | 0.00001000  |
| C | -3.53843200 | -2.67210000 | 0.00045500  |

|    |             |             |             |
|----|-------------|-------------|-------------|
| C  | 3.43140200  | -2.83861600 | 0.00031900  |
| N  | -4.79057100 | -2.15873100 | 0.00026000  |
| C  | -0.58226100 | 4.35489600  | -0.00008800 |
| H  | -1.09616600 | 5.31160400  | -0.00009900 |
| C  | 0.80714500  | 4.32646300  | -0.00009000 |
| H  | 1.36200800  | 5.25973700  | -0.00010400 |
| N  | 4.62033100  | -1.00888800 | 0.00042100  |
| C  | 4.73600800  | -2.34973700 | 0.00062300  |
| Eu | -0.04614000 | -1.47995500 | -0.00039500 |

EuR<sub>2</sub>PhR<sub>4</sub><sup>3+</sup>(PBE0/6-311G\*-RECP)

|   |             |             |             |
|---|-------------|-------------|-------------|
| C | -0.71811100 | 1.90386200  | -0.00014100 |
| C | -2.70839900 | 0.71238800  | 0.00030400  |
| C | -3.47318300 | 1.90334100  | 0.00023900  |
| H | -4.55570000 | 1.86171200  | 0.00046000  |
| C | 0.74818100  | 1.91066400  | -0.00004200 |
| C | 1.42951600  | 3.14979700  | 0.00007100  |
| C | 2.84062000  | 3.12185600  | 0.00055800  |
| C | 3.49426300  | 1.91328600  | 0.00096400  |
| H | 3.40233000  | 4.05120600  | 0.00068000  |
| H | 4.57744900  | 1.87759100  | 0.00139800  |
| N | 1.38851700  | 0.73872900  | 0.00023800  |
| C | -1.41702100 | 3.15280900  | -0.00017400 |
| C | -3.32726600 | -0.57923300 | 0.00096300  |
| C | -4.68983000 | -0.89301700 | 0.00242500  |
| H | -5.57864600 | -0.27894200 | 0.00343800  |
| H | -5.60141600 | -2.78766500 | 0.00401100  |
| H | -3.27910300 | -3.78957000 | 0.00136300  |
| C | 2.74103600  | 0.72962300  | 0.00077400  |
| C | 4.67464700  | -1.00585800 | 0.00191000  |
| H | 5.62469000  | -0.49280800 | 0.00229900  |
| H | 5.32766200  | -3.02721800 | 0.00279900  |
| C | 3.35776600  | -0.58392300 | 0.00113200  |
| N | 2.58160600  | -1.71027400 | 0.00071900  |
| N | -2.59906900 | -1.75934200 | 0.00045000  |
| N | -1.34847200 | 0.73269300  | -0.00014600 |
| C | -2.83523600 | 3.10889500  | -0.00010100 |
| H | -3.40203300 | 4.03493200  | -0.00025500 |
| C | -3.48447200 | -2.72760000 | 0.00159600  |
| N | -4.75186100 | -2.23407600 | 0.00284700  |
| N | 4.57803900  | -2.34384600 | 0.00217100  |
| C | -0.70041800 | 4.35530700  | -0.00033300 |
| H | -1.23665900 | 5.29941300  | -0.00059400 |
| C | 0.69182400  | 4.35767100  | -0.00010100 |

|    |            |             |             |
|----|------------|-------------|-------------|
| H  | 1.22395400 | 5.30465400  | 0.00007100  |
| N  | 3.32610900 | -2.76594000 | 0.00156900  |
| Eu | 0.02428400 | -1.48949400 | -0.00207700 |

EuR<sub>2</sub>PhR<sub>5</sub><sup>3+</sup>(PBE0/6-311G\*-RECP)

|    |             |             |             |
|----|-------------|-------------|-------------|
| C  | 0.74286700  | 1.89471600  | -0.00006300 |
| C  | 2.72875600  | 0.69643200  | 0.00019700  |
| C  | 3.49760500  | 1.88454800  | 0.00037800  |
| H  | 4.58006300  | 1.83925300  | 0.00063300  |
| C  | -0.72185800 | 1.90096800  | -0.00009400 |
| C  | -1.40344300 | 3.13874900  | -0.00007600 |
| C  | -2.81410100 | 3.10924200  | 0.00002900  |
| C  | -3.46531700 | 1.89855300  | 0.00018300  |
| H  | -3.37838100 | 4.03711900  | 0.00003800  |
| H  | -4.54810500 | 1.86118900  | 0.00036000  |
| N  | -1.36074300 | 0.72699900  | -0.00005100 |
| C  | 1.44497300  | 3.14179500  | 0.00004600  |
| C  | 3.33558100  | -0.60008100 | 0.00033600  |
| C  | 4.69358100  | -0.93007600 | 0.00060800  |
| H  | 5.58947000  | -0.32618400 | 0.00067500  |
| H  | 5.58249300  | -2.83578700 | 0.00092200  |
| H  | 3.25030300  | -3.81015200 | 0.00070700  |
| C  | -2.71178900 | 0.71461300  | 0.00014500  |
| C  | -4.72304900 | -0.92691700 | 0.00063800  |
| H  | -5.61224300 | -0.31385200 | 0.00064200  |
| H  | -3.38589600 | -3.65752400 | 0.00103500  |
| C  | -3.36015000 | -0.58630800 | 0.00039100  |
| N  | -2.65244100 | -1.73674800 | 0.00051300  |
| N  | 2.59214300  | -1.77171800 | 0.00032100  |
| N  | 1.36903400  | 0.72210400  | -0.00005400 |
| C  | 2.86342700  | 3.09267800  | 0.00025900  |
| H  | 3.43374400  | 4.01662500  | 0.00037800  |
| C  | 3.46693100  | -2.75045600 | 0.00061300  |
| N  | 4.73945000  | -2.27199800 | 0.00074400  |
| C  | 0.72917500  | 4.34446500  | -0.00003200 |
| H  | 1.26499900  | 5.28887700  | 0.00000300  |
| C  | -0.66428900 | 4.34683600  | -0.00010900 |
| H  | -1.19602000 | 5.29414300  | -0.00015600 |
| N  | -3.58842000 | -2.66598700 | 0.00082200  |
| N  | -4.82138700 | -2.24824600 | 0.00086300  |
| Eu | -0.02154400 | -1.47449400 | -0.00076300 |

EuR<sub>2</sub>PhR<sub>6</sub><sup>3+</sup>(PBE0/6-311G\*-RECP)

|   |            |            |            |
|---|------------|------------|------------|
| C | 0.77763400 | 1.90275300 | 0.00827600 |
|---|------------|------------|------------|

|    |             |             |             |
|----|-------------|-------------|-------------|
| C  | 2.74741800  | 0.69358300  | -0.06232000 |
| C  | 3.52179300  | 1.85886000  | -0.08323800 |
| H  | 4.60427000  | 1.81582800  | -0.12428500 |
| C  | -0.68731700 | 1.91227500  | 0.01872300  |
| C  | -1.36916100 | 3.16990300  | 0.01637000  |
| C  | -2.78746700 | 3.14233200  | 0.00566300  |
| C  | -3.43854900 | 1.94372400  | -0.02242200 |
| H  | -3.34445900 | 4.07427800  | 0.01148700  |
| H  | -4.52141700 | 1.91516500  | -0.04137900 |
| N  | -1.32877200 | 0.74726700  | 0.01112600  |
| C  | 1.47768700  | 3.13235500  | -0.00920800 |
| C  | 3.29553000  | -0.65342800 | -0.10472100 |
| H  | 5.42511700  | -0.53814800 | -0.22539200 |
| H  | 5.37332900  | -3.08843400 | -0.25123600 |
| C  | -2.68763800 | 0.74278500  | -0.02771200 |
| C  | -4.68499600 | -0.83684500 | -0.18105700 |
| H  | -5.56521700 | -0.21121800 | -0.21445400 |
| H  | -3.30677800 | -3.74879200 | -0.20640300 |
| H  | -5.61478300 | -2.71726000 | -0.31077100 |
| C  | -3.31949300 | -0.54049500 | -0.08799800 |
| N  | -2.60604500 | -1.72930000 | -0.08857800 |
| N  | 2.50982900  | -1.72177100 | -0.07469000 |
| N  | 1.39856600  | 0.72442300  | -0.00578000 |
| C  | 2.88462800  | 3.08090300  | -0.04976700 |
| H  | 3.46268200  | 4.00013900  | -0.06151000 |
| C  | -3.50018500 | -2.68480400 | -0.17892600 |
| N  | -4.76098700 | -2.17477200 | -0.23713200 |
| C  | 0.75334100  | 4.35224100  | 0.00620900  |
| H  | 1.29710300  | 5.29250200  | 0.00147700  |
| C  | -0.63516300 | 4.36505200  | 0.02006900  |
| H  | -1.16093100 | 5.31498800  | 0.02724800  |
| N  | 3.26091400  | -2.83530200 | -0.12783900 |
| C  | 4.50965800  | -2.44057400 | -0.19400300 |
| N  | 4.57498500  | -1.08390700 | -0.18165200 |
| Eu | 0.01373600  | -1.49903600 | 0.18862500  |

EuR<sub>2</sub>PhR<sub>7</sub><sup>3+</sup>(PBE0/6-311G\*-RECP)

|   |             |            |             |
|---|-------------|------------|-------------|
| C | -0.74271600 | 1.89545600 | -0.00004000 |
| C | -2.72981600 | 0.70297000 | -0.00003300 |
| C | -3.49569700 | 1.89400500 | -0.00001900 |
| H | -4.57824800 | 1.85151600 | -0.00000400 |
| C | 0.71976600  | 1.89722800 | -0.00003000 |
| C | 1.41124400  | 3.12799800 | 0.00002700  |
| C | 2.82305000  | 3.09068200 | 0.00006200  |

|    |             |             |             |
|----|-------------|-------------|-------------|
| C  | 3.46856500  | 1.87594200  | 0.00005000  |
| H  | 3.39187600  | 4.01576800  | 0.00010700  |
| H  | 4.55033000  | 1.80501000  | 0.00008700  |
| N  | 1.35105800  | 0.71881500  | -0.00005500 |
| C  | -1.44014500 | 3.14574900  | -0.00000900 |
| C  | -3.34118100 | -0.59131100 | -0.00000200 |
| C  | -4.70132900 | -0.91428800 | -0.00001100 |
| H  | -5.59391200 | -0.30561600 | -0.00006400 |
| H  | -5.60008400 | -2.81510700 | 0.00006100  |
| H  | -3.27209200 | -3.80093900 | 0.00017800  |
| C  | 2.69725200  | 0.70523100  | -0.00000800 |
| H  | 3.46702400  | -3.77847700 | 0.00010800  |
| H  | 5.69592600  | -2.49816100 | -0.00000900 |
| C  | 3.32486000  | -0.60863300 | -0.00000400 |
| N  | 2.62282900  | -1.78930900 | 0.00004600  |
| N  | -2.60382600 | -1.76653500 | 0.00006000  |
| N  | -1.37077600 | 0.72399800  | -0.00005700 |
| C  | -2.85884500 | 3.10061000  | -0.00000700 |
| H  | -3.42689600 | 4.02590800  | 0.00001400  |
| C  | -3.48345400 | -2.74021900 | 0.00011300  |
| C  | 3.58339400  | -2.70375800 | 0.00006300  |
| N  | -4.75431800 | -2.25571400 | 0.00005500  |
| N  | 4.76931600  | -2.08714000 | 0.00000500  |
| C  | -0.71775000 | 4.34431200  | 0.00002300  |
| H  | -1.24853000 | 5.29151400  | 0.00004100  |
| C  | 0.67585500  | 4.34008700  | 0.00004200  |
| H  | 1.21154300  | 5.28515200  | 0.00007200  |
| N  | 4.62988100  | -0.76856600 | -0.00004000 |
| Eu | 0.02754900  | -1.49012300 | -0.00003200 |

EuR<sub>2</sub>PhR<sub>8</sub><sup>3+</sup>(PBE0/6-311G\*-RECP)

|   |             |            |             |
|---|-------------|------------|-------------|
| C | -0.71800600 | 1.90101900 | 0.00001000  |
| C | -2.71442900 | 0.72406000 | -0.00026200 |
| C | -3.47062200 | 1.92175300 | -0.00027400 |
| H | -4.55352600 | 1.88852000 | -0.00044100 |
| C | 0.74657100  | 1.89536900 | 0.00010300  |
| C | 1.44135400  | 3.12589700 | 0.00000800  |
| C | 2.84966000  | 3.08075200 | -0.00003100 |
| C | 3.49051700  | 1.86195000 | 0.00004900  |
| H | 3.42469400  | 4.00196300 | -0.00021200 |
| H | 4.57390200  | 1.82500100 | -0.00004000 |
| N | 1.37297100  | 0.71668400 | 0.00021400  |
| C | -1.40590600 | 3.15664500 | 0.00007200  |

|    |             |             |             |
|----|-------------|-------------|-------------|
| C  | -3.33991800 | -0.56271900 | -0.00014100 |
| C  | -4.70730800 | -0.86832100 | -0.00029400 |
| H  | -5.59191400 | -0.24783800 | -0.00109100 |
| H  | -5.63071800 | -2.75599200 | -0.00107700 |
| H  | -3.31457200 | -3.77275100 | 0.00158900  |
| C  | 2.72132800  | 0.69066900  | 0.00022300  |
| H  | 5.42753200  | -0.39907900 | 0.00106800  |
| H  | 3.30947600  | -3.81296800 | -0.00116400 |
| C  | 3.30113100  | -0.64391200 | 0.00012000  |
| N  | 2.58199900  | -1.77527600 | -0.00105800 |
| N  | -2.61971200 | -1.74736000 | 0.00089300  |
| N  | -1.35458200 | 0.73428400  | -0.00011800 |
| C  | -2.82432900 | 3.12321000  | -0.00005000 |
| H  | -3.38502200 | 4.05297300  | 0.00008300  |
| C  | -3.51183900 | -2.70912900 | 0.00084100  |
| C  | 3.52299400  | -2.75366400 | -0.00071800 |
| N  | -4.77757100 | -2.20724800 | -0.00033300 |
| C  | -0.67692300 | 4.35358000  | 0.00009700  |
| H  | -1.20521100 | 5.30217400  | 0.00014900  |
| C  | 0.71255100  | 4.34398700  | -0.00000200 |
| H  | 1.25404900  | 5.28566300  | -0.00008400 |
| N  | 4.75830200  | -2.29782200 | 0.00024300  |
| N  | 4.59975100  | -0.98144600 | 0.00026900  |
| Eu | 0.02003600  | -1.49694100 | 0.00003100  |

EuR<sub>3</sub>PhR<sub>3</sub><sup>3+</sup>(PBE0/6-311G\*-RECP)

|   |             |             |             |
|---|-------------|-------------|-------------|
| C | 0.00000600  | 0.73162000  | -1.88876200 |
| C | 0.00002700  | 2.71739500  | -0.69634200 |
| C | 0.00007500  | 3.47887100  | -1.88177600 |
| H | 0.00010300  | 4.56241700  | -1.85610300 |
| C | -0.00000600 | -0.73162000 | -1.88876200 |
| C | -0.00003200 | -1.42099400 | -3.13229100 |
| C | -0.00007400 | -2.83420200 | -3.09027700 |
| C | -0.00007500 | -3.47887100 | -1.88177600 |
| H | -0.00010500 | -3.40224000 | -4.01559100 |
| H | -0.00010300 | -4.56241700 | -1.85610300 |
| N | 0.00000600  | -1.36344000 | -0.71605400 |
| C | 0.00003200  | 1.42099400  | -3.13229100 |
| C | -0.00000600 | 3.30601900  | 0.61650000  |
| H | -0.00000700 | 5.40593700  | 0.25604400  |
| H | 0.00039400  | 5.74888600  | 2.73375900  |
| H | -0.00033300 | 3.20996600  | 3.81202300  |
| C | -0.00002700 | -2.71739500 | -0.69634200 |

|    |             |             |             |
|----|-------------|-------------|-------------|
| H  | 0.00000700  | -5.40593700 | 0.25604400  |
| H  | 0.00033300  | -3.20996600 | 3.81202300  |
| H  | -0.00039400 | -5.74888600 | 2.73375900  |
| C  | 0.00000600  | -3.30601900 | 0.61650000  |
| N  | 0.00018200  | -2.59627400 | 1.76073800  |
| N  | -0.00018200 | 2.59627400  | 1.76073800  |
| N  | -0.00000600 | 1.36344000  | -0.71605400 |
| C  | 0.00007400  | 2.83420200  | -3.09027700 |
| H  | 0.00010500  | 3.40224000  | -4.01559100 |
| C  | -0.00023500 | 3.49254500  | 2.76904200  |
| C  | 0.00023500  | -3.49254500 | 2.76904200  |
| C  | 0.00019300  | 4.78259000  | 2.24976000  |
| C  | -0.00019300 | -4.78259000 | 2.24976000  |
| N  | -0.00003500 | 4.63488100  | 0.91019700  |
| N  | 0.00003500  | -4.63488100 | 0.91019700  |
| C  | 0.00002100  | 0.69263700  | -4.33883800 |
| C  | -0.00002100 | -0.69263700 | -4.33883800 |
| H  | 0.00003700  | 1.22851500  | -5.28318600 |
| H  | -0.00003700 | -1.22851500 | -5.28318600 |
| Eu | 0.00000000  | 0.00000000  | 1.49291400  |

EuR<sub>3</sub>PhR<sub>4</sub><sup>3+</sup>(PBE0/6-311G\*-RECP)

|   |             |             |             |
|---|-------------|-------------|-------------|
| C | 0.76556000  | 1.87928000  | 0.01179600  |
| C | 2.72659700  | 0.64695400  | -0.02722200 |
| C | 3.52020800  | 1.81500500  | -0.02518700 |
| H | 4.60275500  | 1.76277400  | -0.04047200 |
| C | -0.69713100 | 1.91791300  | 0.00720300  |
| C | -1.34810900 | 3.17161300  | -0.00349000 |
| C | -2.75913500 | 3.17530700  | -0.02985700 |
| C | -3.43979200 | 1.98239400  | -0.05413600 |
| H | -3.29966600 | 4.11708000  | -0.03618800 |
| H | -4.52319600 | 1.97158200  | -0.08192400 |
| N | -1.36489000 | 0.75874200  | -0.00245600 |
| C | 1.49296700  | 3.11325400  | 0.00932000  |
| C | 3.28514900  | -0.67009800 | -0.07191600 |
| H | 5.39533600  | -0.34633500 | -0.15954500 |
| H | 5.69149500  | -2.82698200 | -0.23199200 |
| H | 3.12965400  | -3.86301300 | -0.14338500 |
| C | -2.71436300 | 0.78086400  | -0.04236700 |
| H | -5.62257400 | -0.37976900 | -0.17911300 |
| H | -5.37818000 | -2.92004700 | -0.19755700 |
| C | -3.36098500 | -0.51884700 | -0.07780900 |
| N | -2.60919900 | -1.66131100 | -0.05789700 |
| N | 2.55536900  | -1.80723500 | -0.06764900 |



|    |             |             |             |
|----|-------------|-------------|-------------|
| N  | 1.36976400  | 0.69554600  | 0.00376000  |
| C  | 2.90664500  | 3.03643900  | -0.00212300 |
| H  | 3.49548400  | 3.94861100  | 0.00151500  |
| C  | 3.42704900  | -2.82355500 | -0.13020800 |
| C  | 4.73618100  | -2.32296700 | -0.17581300 |
| N  | 4.61313300  | -0.98793400 | -0.13711100 |
| C  | 0.80312400  | 4.33495900  | 0.01427000  |
| C  | -0.58260400 | 4.36559900  | 0.00728700  |
| H  | 1.36167400  | 5.26579700  | 0.01863700  |
| H  | -1.09651900 | 5.32250700  | 0.00608400  |
| N  | -3.37467200 | -2.70172100 | -0.10355600 |
| C  | -4.68429900 | -0.91269300 | -0.14167500 |
| N  | -4.61524900 | -2.25293500 | -0.15449200 |
| Eu | -0.06727700 | -1.49496500 | 0.14398900  |

EuR<sub>3</sub>PhR<sub>5</sub><sup>3+</sup>(PBE0/6-311G\*-RECP)

|   |             |             |             |
|---|-------------|-------------|-------------|
| C | 0.78921500  | 1.86960200  | 0.00022600  |
| C | 2.74880600  | 0.63453700  | -0.00093200 |
| C | 3.54403700  | 1.80128200  | -0.00101200 |
| H | 4.62663900  | 1.74719500  | -0.00155300 |
| C | -0.67256700 | 1.90622700  | 0.00021100  |
| C | -1.32488900 | 3.15825700  | 0.00003100  |
| C | -2.73573000 | 3.16005900  | -0.00052000 |
| C | -3.41394200 | 1.96490800  | -0.00116900 |
| H | -3.27902200 | 4.10033400  | -0.00058800 |
| H | -4.49731600 | 1.95212300  | -0.00181300 |
| N | -1.33883700 | 0.74484000  | -0.00006100 |
| C | 1.51787300  | 3.10306700  | 0.00007800  |
| C | 3.30044200  | -0.68546900 | -0.00208800 |
| H | 5.41477400  | -0.37987900 | -0.00449100 |
| H | 5.69248700  | -2.86391900 | -0.00627300 |
| H | 3.12183000  | -3.87838200 | -0.00389300 |
| C | -2.68774300 | 0.76323000  | -0.00102000 |
| H | -5.61251400 | -0.19611900 | -0.00472600 |
| H | -3.46784900 | -3.59297300 | -0.00399200 |
| C | -3.36811000 | -0.52241600 | -0.00214900 |
| N | -2.68824200 | -1.68955000 | -0.00195400 |
| N | 2.56055400  | -1.81662600 | -0.00191000 |
| N | 1.39156400  | 0.68574500  | 0.00001200  |
| C | 2.93179800  | 3.02403600  | -0.00037200 |
| H | 3.52209400  | 3.93534000  | -0.00036700 |
| C | 3.42593600  | -2.84081600 | -0.00355500 |
| C | 4.73999800  | -2.35132300 | -0.00480100 |

|    |             |             |             |
|----|-------------|-------------|-------------|
| N  | 4.62668200  | -1.01500100 | -0.00383100 |
| C  | 0.82755300  | 4.32403200  | 0.00028800  |
| C  | -0.55935900 | 4.35318500  | 0.00026000  |
| H  | 1.38471200  | 5.25578500  | 0.00035300  |
| H  | -1.07402400 | 5.30978900  | 0.00030000  |
| N  | -4.86823600 | -2.14911600 | -0.00482800 |
| N  | -3.64646800 | -2.59686800 | -0.00357700 |
| C  | -4.73820600 | -0.83019800 | -0.00396500 |
| Eu | -0.06415200 | -1.48454700 | 0.00417500  |

EuR<sub>3</sub>PhR<sub>6</sub><sup>3+</sup>(PBE0/6-311G\*-RECP)

|   |             |             |             |
|---|-------------|-------------|-------------|
| C | 0.73510600  | 1.88731900  | -0.00029900 |
| C | 2.71169500  | 0.68224200  | 0.00054200  |
| C | 3.48781400  | 1.86255900  | 0.00060400  |
| H | 4.57116100  | 1.82685800  | 0.00118700  |
| C | -0.72767400 | 1.90901100  | -0.00021100 |
| C | -1.39739900 | 3.15460200  | 0.00008100  |
| C | -2.80558600 | 3.13744600  | 0.00063300  |
| C | -3.47286400 | 1.93222200  | 0.00111500  |
| H | -3.36079800 | 4.07067300  | 0.00079900  |
| H | -4.55683600 | 1.91543500  | 0.00162100  |
| N | -1.37878500 | 0.74388100  | -0.00002500 |
| C | 1.44318200  | 3.13156100  | -0.00022100 |
| C | 3.29577500  | -0.62490000 | 0.00158900  |
| H | 5.40181800  | -0.25870900 | 0.00181200  |
| H | 5.75077800  | -2.73315100 | 0.00415500  |
| H | 3.20762200  | -3.82155600 | 0.00454500  |
| C | -2.72736900 | 0.74749700  | 0.00086500  |
| H | -5.44434100 | -0.40687900 | 0.00461100  |
| H | -5.46833100 | -2.95820100 | 0.00470300  |
| C | -3.31616900 | -0.58400500 | 0.00159700  |
| N | -2.56160300 | -1.67427000 | 0.00080300  |
| N | 2.58958200  | -1.77779900 | 0.00239600  |
| N | 1.35456700  | 0.71055900  | -0.00010800 |
| C | 2.85706900  | 3.07565300  | 0.00009000  |
| H | 3.43316700  | 3.99591100  | 0.00010700  |
| C | 3.48266900  | -2.77573000 | 0.00348200  |
| C | 4.78395700  | -2.24792100 | 0.00338400  |
| C | -4.58410400 | -2.33606900 | 0.00350300  |
| N | 4.63220600  | -0.91587300 | 0.00236100  |
| C | 0.73537600  | 4.34650400  | -0.00027900 |
| C | -0.64639800 | 4.36135100  | -0.00014500 |
| H | 1.28377500  | 5.28334700  | -0.00030700 |
| H | -1.17316000 | 5.31113900  | -0.00013700 |

|    |             |             |             |
|----|-------------|-------------|-------------|
| N  | -3.34666200 | -2.76697200 | 0.00186500  |
| N  | -4.60928000 | -0.97710900 | 0.00339500  |
| Eu | -0.05611900 | -1.51710900 | -0.00310900 |

EuR<sub>3</sub>PhR<sub>7</sub><sup>3+</sup>(PBE0/6-311G\*-RECP)

|    |             |             |             |
|----|-------------|-------------|-------------|
| C  | -0.78739500 | 1.87086900  | -0.00003700 |
| C  | -2.74937700 | 0.64295700  | -0.00006400 |
| C  | -3.54072900 | 1.81318000  | -0.00018900 |
| H  | -4.62350500 | 1.76284900  | -0.00024800 |
| C  | 0.67239400  | 1.90196600  | -0.00007000 |
| C  | 1.33568200  | 3.14702700  | -0.00036500 |
| C  | 2.74793000  | 3.14029200  | -0.00054200 |
| C  | 3.41983200  | 1.94072900  | -0.00047600 |
| H  | 3.29626800  | 4.07762300  | -0.00074400 |
| H  | 4.50291300  | 1.89375100  | -0.00065100 |
| N  | 1.33044100  | 0.73568700  | 0.00010000  |
| C  | -1.51049100 | 3.10787100  | -0.00023800 |
| C  | -3.30672300 | -0.67457200 | -0.00016200 |
| H  | -5.41924300 | -0.35581800 | -0.00055500 |
| H  | -5.71214900 | -2.83820800 | -0.00067800 |
| H  | -3.14710900 | -3.86768200 | -0.00037400 |
| C  | 2.67479400  | 0.75225400  | -0.00016000 |
| H  | 3.54842900  | -3.71352800 | 0.00062600  |
| H  | 5.74690500  | -2.38249900 | -0.00086000 |
| C  | 3.33384800  | -0.54693500 | -0.00015400 |
| N  | 2.65897300  | -1.74370000 | -0.00001500 |
| N  | -2.57368600 | -1.81007000 | -0.00009900 |
| N  | -1.39262700 | 0.68852500  | 0.00009800  |
| C  | -2.92477100 | 3.03399800  | -0.00025500 |
| H  | -3.51213400 | 3.94714600  | -0.00035500 |
| C  | -3.44526400 | -2.82842300 | -0.00033100 |
| C  | 3.64043300  | -2.63643900 | 0.00030400  |
| C  | -4.75665800 | -2.33140300 | -0.00048100 |
| N  | -4.63540000 | -0.99594200 | -0.00042800 |
| C  | -0.81255300 | 4.32447800  | -0.00041500 |
| C  | 0.57474300  | 4.34626600  | -0.00049100 |
| H  | -1.36420000 | 5.25946600  | -0.00052500 |
| H  | 1.09394800  | 5.30040700  | -0.00065300 |
| N  | 4.64160900  | -0.67721400 | -0.00067500 |
| N  | 4.81111900  | -1.99283700 | -0.00054400 |
| Eu | 0.06845600  | -1.50062400 | 0.00064600  |

EuR<sub>3</sub>PhR<sub>8</sub><sup>3+</sup>(PBE0/6-311G\*-RECP)

|    |             |             |             |
|----|-------------|-------------|-------------|
| C  | -0.76440600 | 1.87673300  | -0.00841500 |
| C  | -2.73399200 | 0.66160300  | 0.02156500  |
| C  | -3.51705000 | 1.83757100  | 0.02215200  |
| H  | -4.60015800 | 1.79554200  | 0.03483100  |
| C  | 0.69719100  | 1.90144000  | -0.00645900 |
| C  | 1.36325900  | 3.14661600  | 0.00013500  |
| C  | 2.77229100  | 3.13182200  | 0.01716900  |
| C  | 3.43966100  | 1.92819900  | 0.03477200  |
| H  | 3.32689000  | 4.06543500  | 0.02018000  |
| H  | 4.52348200  | 1.91534700  | 0.05260400  |
| N  | 1.35061300  | 0.73498000  | 0.00085500  |
| C  | -1.47874500 | 3.11810400  | -0.00521400 |
| C  | -3.30343100 | -0.65038500 | 0.05352100  |
| H  | -5.41287600 | -0.30951400 | 0.12081700  |
| H  | -5.73013000 | -2.78795300 | 0.17178000  |
| H  | -3.17527000 | -3.84510200 | 0.10211300  |
| C  | 2.69684300  | 0.73923600  | 0.02847900  |
| H  | 5.42520900  | -0.29043100 | 0.13112100  |
| H  | 3.38464800  | -3.75100700 | 0.09250800  |
| C  | 3.30708300  | -0.58237300 | 0.05639900  |
| N  | 2.61300300  | -1.72936300 | 0.04365000  |
| N  | -2.58222600 | -1.79447900 | 0.04815800  |
| N  | -1.37712300 | 0.69789600  | -0.00247500 |
| C  | -2.89285900 | 3.05416300  | 0.00518700  |
| H  | -3.47409000 | 3.97123300  | 0.00389400  |
| C  | -3.46216100 | -2.80249200 | 0.09404700  |
| C  | 3.57527400  | -2.68735100 | 0.08797800  |
| C  | -4.77029300 | -2.29058900 | 0.12990600  |
| N  | -4.63559500 | -0.95767300 | 0.10277900  |
| N  | 4.61095800  | -0.89096300 | 0.10614100  |
| C  | -0.77485100 | 4.33409700  | -0.00972200 |
| C  | 0.60838300  | 4.35150900  | -0.00690100 |
| H  | -1.32454300 | 5.27022300  | -0.01201100 |
| H  | 1.13264100  | 5.30277700  | -0.00709700 |
| N  | 4.79847700  | -2.20444500 | 0.12691200  |
| Eu | 0.06197200  | -1.50374000 | -0.10762700 |

EuR<sub>4</sub>PhR<sub>4</sub><sup>3+</sup>(PBE0/6-311G\*-RECP)

|   |             |            |            |
|---|-------------|------------|------------|
| C | -0.73523100 | 1.91802100 | 0.00006100 |
|---|-------------|------------|------------|

|    |             |             |             |
|----|-------------|-------------|-------------|
| C  | -2.73012500 | 0.74029000  | 0.00084400  |
| C  | -3.48928100 | 1.92348900  | 0.00117000  |
| H  | -4.57226100 | 1.88307500  | 0.00195600  |
| C  | 0.73522300  | 1.91802200  | -0.00024300 |
| C  | 1.42562300  | 3.16274700  | -0.00029100 |
| C  | 2.84122800  | 3.13089200  | -0.00077900 |
| C  | 3.48927200  | 1.92349600  | -0.00114900 |
| H  | 3.40357300  | 4.05994500  | -0.00085300 |
| H  | 4.57225300  | 1.88308400  | -0.00183600 |
| N  | 1.37132100  | 0.74941000  | -0.00046800 |
| C  | -1.42563300 | 3.16274500  | 0.00004800  |
| C  | -3.34493400 | -0.56694500 | 0.00099900  |
| H  | -5.61559000 | -0.46511800 | -0.00023200 |
| H  | -5.33117400 | -3.00021900 | -0.00025200 |
| C  | 2.73012000  | 0.74029500  | -0.00076100 |
| H  | 5.61558800  | -0.46509400 | 0.00093200  |
| H  | 5.33119000  | -3.00019700 | 0.00127900  |
| C  | 3.34493300  | -0.56693800 | -0.00066300 |
| N  | 2.57505300  | -1.69976400 | -0.00113000 |
| N  | -2.57504600 | -1.69976500 | 0.00151200  |
| N  | -1.37132700 | 0.74940800  | 0.00040300  |
| C  | -2.84123900 | 3.13088700  | 0.00061700  |
| H  | -3.40358500 | 4.05993900  | 0.00063200  |
| N  | -3.32461700 | -2.74782200 | 0.00092400  |
| N  | 3.32463200  | -2.74781500 | -0.00027100 |
| N  | -4.57875300 | -2.31887800 | 0.00013000  |
| N  | 4.57876500  | -2.31886200 | 0.00066800  |
| C  | -4.66827600 | -0.98396000 | 0.00022000  |
| C  | 4.66827800  | -0.98394400 | 0.00039600  |
| C  | -0.70001900 | 4.36521300  | -0.00005400 |
| H  | -1.23149500 | 5.31262200  | 0.00013900  |
| C  | 0.70000600  | 4.36521400  | -0.00030600 |
| H  | 1.23148000  | 5.31262400  | -0.00057300 |
| Eu | 0.00000200  | -1.51776500 | -0.00022600 |

EuR<sub>4</sub>PhR<sub>5</sub><sup>3+</sup>(PBE0/6-311G\*-RECP)

|   |             |            |             |
|---|-------------|------------|-------------|
| C | -0.70580400 | 1.90796800 | -0.00719300 |
| C | -2.69901400 | 0.72669700 | 0.01658500  |
| C | -3.45705200 | 1.91083700 | 0.01499300  |
| H | -4.53961000 | 1.86997300 | 0.02579400  |
| C | 0.76366100  | 1.90738300 | -0.00397300 |
| C | 1.45874300  | 3.14943300 | 0.00299100  |
| C | 2.87455200  | 3.11045400 | 0.01867000  |
| C | 3.51761300  | 1.89954500 | 0.03311800  |

|    |             |             |             |
|----|-------------|-------------|-------------|
| H  | 3.44157100  | 4.03674500  | 0.02241500  |
| H  | 4.60037200  | 1.85444900  | 0.04980400  |
| N  | 1.39438200  | 0.73722000  | 0.00094600  |
| C  | -1.39510000 | 3.15197400  | -0.00581600 |
| C  | -3.34661700 | -0.56771800 | 0.04508200  |
| H  | -5.60117400 | -0.28690200 | 0.09576300  |
| C  | 2.75296400  | 0.72035800  | 0.02573100  |
| H  | 5.62196800  | -0.53161600 | 0.11176600  |
| H  | 5.29312900  | -3.06158300 | 0.12155100  |
| C  | 3.35104700  | -0.59403100 | 0.04729200  |
| N  | 2.56127200  | -1.71346400 | 0.03390300  |
| N  | -2.64471400 | -1.72418900 | 0.04799700  |
| N  | -1.34163500 | 0.73803500  | -0.00220700 |
| C  | -2.81030100 | 3.11980400  | 0.00105900  |
| H  | -3.37445300 | 4.04786200  | -0.00075200 |
| N  | 3.29217700  | -2.77455500 | 0.06187200  |
| N  | 4.55270400  | -2.36743600 | 0.09471600  |
| C  | -4.71421400 | -0.90353300 | 0.08394100  |
| C  | 4.66598600  | -1.03400800 | 0.08768200  |
| C  | -0.66680900 | 4.35370400  | -0.00826100 |
| H  | -1.19681000 | 5.30207300  | -0.01112500 |
| C  | 0.73508100  | 4.35267900  | -0.00336500 |
| H  | 1.26664600  | 5.30013600  | -0.00216500 |
| N  | -3.58318600 | -2.64474000 | 0.08647900  |
| H  | -3.38509800 | -3.63823600 | 0.10160200  |
| N  | -4.81708800 | -2.22258500 | 0.10960000  |
| Eu | 0.00043900  | -1.49778100 | -0.08950800 |

EuR<sub>4</sub>PhR<sub>6</sub><sup>3+</sup>(PBE0/6-311G\*-RECP)

|   |             |             |             |
|---|-------------|-------------|-------------|
| C | -0.76579900 | 1.90895000  | -0.01332600 |
| C | -2.73610100 | 0.69923500  | 0.05585900  |
| C | -3.51746900 | 1.86251500  | 0.07060200  |
| H | -4.59978200 | 1.81372100  | 0.10888800  |
| C | 0.70152100  | 1.92687200  | -0.01797100 |
| C | 1.37470900  | 3.18035700  | -0.01052200 |
| C | 2.79104300  | 3.16409300  | 0.00888000  |
| C | 3.45214500  | 1.96439500  | 0.03810600  |
| H | 3.34332000  | 4.09916000  | 0.00866600  |
| H | 4.53528100  | 1.93656600  | 0.06421500  |
| N | 1.34997700  | 0.76426600  | -0.00965200 |
| C | -1.47590700 | 3.14178900  | -0.00099300 |
| C | -3.28058900 | -0.64223000 | 0.10262900  |
| H | -5.41308500 | -0.53177900 | 0.21238100  |
| C | 2.70692800  | 0.77102200  | 0.03625000  |

|    |             |             |             |
|----|-------------|-------------|-------------|
| H  | 5.59806300  | -0.40871000 | 0.23520300  |
| H  | 5.33082000  | -2.94527300 | 0.28851200  |
| C  | 3.33243200  | -0.52932200 | 0.09378000  |
| N  | 2.57153500  | -1.66901400 | 0.07843100  |
| N  | -2.49267200 | -1.71517600 | 0.08274400  |
| N  | -1.38155900 | 0.73191800  | 0.00211500  |
| C  | -2.88701400 | 3.08436800  | 0.03445800  |
| H  | -3.46728700 | 4.00236700  | 0.04089200  |
| N  | 3.32689000  | -2.71005600 | 0.15411000  |
| N  | 4.57531200  | -2.27037700 | 0.22160300  |
| C  | 4.65618000  | -0.93539400 | 0.18789200  |
| C  | -0.76423900 | 4.35761600  | -0.01342200 |
| H  | -1.30846100 | 5.29765200  | -0.01125500 |
| C  | 0.63159100  | 4.37418500  | -0.01969500 |
| H  | 1.15170300  | 5.32780300  | -0.02586300 |
| N  | -3.23990700 | -2.82346200 | 0.13634100  |
| H  | -5.35636500 | -3.08034900 | 0.25082200  |
| C  | -4.49453800 | -2.42925500 | 0.19446300  |
| N  | -4.56083700 | -1.07579400 | 0.17560100  |
| Eu | 0.01262300  | -1.51638800 | -0.18322900 |

EuR<sub>4</sub>PhR<sub>7</sub><sup>3+</sup>(PBE0/6-311G\*-RECP)

|   |             |             |             |
|---|-------------|-------------|-------------|
| C | -0.70216000 | 1.90555300  | 0.00012700  |
| C | -2.68334200 | 0.71947300  | -0.00035400 |
| C | -3.45873500 | 1.89006400  | -0.00042000 |
| H | -4.54028500 | 1.81574100  | -0.00069800 |
| C | 0.76552300  | 1.90864100  | 0.00010600  |
| C | 1.45695300  | 3.15353300  | 0.00006300  |
| C | 2.87336800  | 3.11734700  | -0.00017000 |
| C | 3.51817200  | 1.90764800  | -0.00049200 |
| H | 3.43875800  | 4.04459600  | -0.00015000 |
| H | 4.60110100  | 1.86446000  | -0.00071600 |
| N | 1.39701400  | 0.73946300  | -0.00007600 |
| C | -1.40067600 | 3.14240000  | 0.00004100  |
| C | -3.31086200 | -0.58887900 | -0.00089400 |
| C | 2.75555900  | 0.72612200  | -0.00049000 |
| H | 5.62911400  | -0.51027000 | -0.00266800 |
| H | 5.31567400  | -3.04211400 | -0.00294200 |
| C | 3.35754900  | -0.58618900 | -0.00097600 |
| N | 2.57377700  | -1.71029800 | -0.00051800 |
| N | -2.61872900 | -1.77528800 | -0.00051900 |
| N | -1.33084300 | 0.73144400  | 0.00007200  |
| C | -2.81704000 | 3.10303300  | -0.00015800 |
| H | -3.38537800 | 4.02852500  | -0.00017100 |

|    |             |             |             |
|----|-------------|-------------|-------------|
| N  | 3.31149500  | -2.76642900 | -0.00132100 |
| N  | 4.57106300  | -2.35221900 | -0.00221200 |
| C  | 4.67603600  | -1.01860500 | -0.00205000 |
| C  | -0.67520400 | 4.34737400  | 0.00014300  |
| H  | -1.20827700 | 5.29404300  | 0.00019100  |
| C  | 0.72762900  | 4.35229400  | 0.00013900  |
| H  | 1.25418300  | 5.30249700  | 0.00012700  |
| H  | -5.69865100 | -2.45974900 | -0.00310200 |
| C  | -3.58408800 | -2.68151200 | -0.00149600 |
| H  | -3.47637200 | -3.75746400 | -0.00151100 |
| N  | -4.76880400 | -2.05413900 | -0.00230700 |
| N  | -4.62088400 | -0.74095500 | -0.00203600 |
| Eu | -0.00826300 | -1.51541400 | 0.00183100  |

EuR<sub>4</sub>PhR<sub>8</sub><sup>3+</sup>(PBE0/6-311G\*-RECP)

|   |             |             |             |
|---|-------------|-------------|-------------|
| C | 0.73454800  | 1.90125200  | -0.00025500 |
| C | 2.71078300  | 0.69792600  | 0.00064800  |
| C | 3.48612200  | 1.86788800  | 0.00088200  |
| H | 4.56929100  | 1.82626700  | 0.00153900  |
| C | -0.73416300 | 1.91522500  | -0.00024400 |
| C | -1.41330200 | 3.16692300  | 0.00000200  |
| C | -2.83012900 | 3.14495200  | 0.00034200  |
| C | -3.48684100 | 1.94251700  | 0.00067100  |
| H | -3.38591600 | 4.07799700  | 0.00046700  |
| H | -4.57019000 | 1.91040400  | 0.00106900  |
| N | -1.37749300 | 0.75189700  | -0.00021400 |
| C | 1.43885900  | 3.13633500  | -0.00010600 |
| C | 3.28822500  | -0.63047500 | 0.00135500  |
| C | -2.73663500 | 0.75243000  | 0.00051200  |
| H | -5.62706800 | -0.44424500 | 0.00301200  |
| H | -5.34833000 | -2.97987800 | 0.00391100  |
| C | -3.35570300 | -0.55105300 | 0.00129000  |
| N | -2.58801500 | -1.68645600 | 0.00131600  |
| N | 2.57416500  | -1.76793900 | 0.00177100  |
| N | 1.35609100  | 0.72512600  | -0.00005400 |
| C | 2.85146100  | 3.08606800  | 0.00037200  |
| H | 3.42800500  | 4.00645300  | 0.00047400  |
| N | -3.34022100 | -2.73185300 | 0.00222300  |
| N | -4.59427100 | -2.29993300 | 0.00306700  |
| C | -4.68092100 | -0.96556900 | 0.00248700  |
| C | 0.72296800  | 4.34891200  | -0.00015700 |
| H | 1.26380000  | 5.29105100  | -0.00006100 |
| C | -0.67568200 | 4.36195400  | -0.00015900 |
| H | -1.19763900 | 5.31468300  | -0.00022500 |



|    |             |             |             |
|----|-------------|-------------|-------------|
| C  | 3.51454400  | -2.73940200 | 0.00263100  |
| H  | 3.30813100  | -3.80040500 | 0.00323000  |
| N  | 4.59198700  | -0.96557600 | 0.00211300  |
| H  | 5.41899600  | -0.38082100 | 0.00200500  |
| N  | 4.75404200  | -2.27557300 | 0.00280000  |
| Eu | -0.00790300 | -1.51880400 | -0.00266900 |

EuR<sub>5</sub>PhR<sub>5</sub><sup>3+</sup>(PBE0/6-311G\*-RECP)

|   |             |             |             |
|---|-------------|-------------|-------------|
| C | -0.73412400 | 1.89721400  | 0.00030700  |
| C | -2.72271100 | 0.70806300  | -0.00095100 |
| C | -3.48557800 | 1.88864500  | -0.00102300 |
| H | -4.56811300 | 1.84346900  | -0.00166300 |
| C | 0.73431000  | 1.89717700  | 0.00026200  |
| C | 1.42803700  | 3.13868800  | -0.00014700 |
| C | 2.84340700  | 3.10059000  | -0.00073300 |
| C | 3.48576800  | 1.88848400  | -0.00130900 |
| H | 3.41155900  | 4.02628800  | -0.00095300 |
| H | 4.56830100  | 1.84324700  | -0.00207600 |
| N | 1.36539600  | 0.72557300  | 0.00014100  |
| C | -1.42779000 | 3.13875300  | 0.00002900  |
| C | -3.35798300 | -0.59212700 | -0.00242400 |
| H | -5.61590100 | -0.33885400 | -0.00424900 |
| C | 2.72284100  | 0.70794300  | -0.00103700 |
| H | 5.61595600  | -0.33932500 | -0.00373200 |
| C | 3.35800700  | -0.59229300 | -0.00238800 |
| N | 2.64069400  | -1.73986100 | -0.00307400 |
| N | -2.64082700 | -1.73980800 | -0.00295900 |
| N | -1.36526600 | 0.72563500  | 0.00013400  |
| C | -2.84316000 | 3.10072200  | -0.00040500 |
| H | -3.41127100 | 4.02644500  | -0.00047800 |
| N | -4.80786200 | -2.26546200 | -0.00543500 |
| N | 4.80768200  | -2.26582300 | -0.00521500 |
| C | -4.72134100 | -0.94468900 | -0.00403500 |
| C | 4.72131900  | -0.94504500 | -0.00373400 |
| C | -0.70151700 | 4.34140400  | 0.00005300  |
| H | -1.23185200 | 5.28969000  | 0.00002000  |
| C | 0.70182400  | 4.34137100  | -0.00005700 |
| H | 1.23220100  | 5.28963300  | -0.00019900 |
| N | -3.56924000 | -2.67253200 | -0.00474300 |
| H | -3.36100300 | -3.66402700 | -0.00595100 |
| N | 3.56899400  | -2.67270000 | -0.00467900 |
| H | 3.36063200  | -3.66416700 | -0.00598100 |

|                                                                     |             |             |             |
|---------------------------------------------------------------------|-------------|-------------|-------------|
| Eu                                                                  | -0.00008500 | -1.48296700 | 0.00494600  |
| EuR <sub>5</sub> PhR <sub>6</sub> <sup>3+</sup> (PBE0/6-311G*-RECP) |             |             |             |
| C                                                                   | 0.67468200  | 1.91475000  | -0.00013000 |
| C                                                                   | 2.68196400  | 0.75945300  | 0.00089400  |
| C                                                                   | 3.42459500  | 1.95508700  | 0.00050400  |
| H                                                                   | 4.50765000  | 1.92801000  | 0.00081600  |
| C                                                                   | -0.79393700 | 1.89783800  | 0.00003400  |
| C                                                                   | -1.50584200 | 3.13007600  | 0.00014600  |
| C                                                                   | -2.91744800 | 3.07138100  | 0.00086800  |
| C                                                                   | -3.54769800 | 1.84819000  | 0.00160700  |
| H                                                                   | -3.49883300 | 3.98878700  | 0.00094300  |
| H                                                                   | -4.63067100 | 1.79820500  | 0.00230600  |
| N                                                                   | -1.40822700 | 0.72172100  | 0.00039000  |
| C                                                                   | 1.34713700  | 3.16920900  | -0.00035900 |
| C                                                                   | 3.34939800  | -0.52372200 | 0.00213900  |
| H                                                                   | 5.60068700  | -0.20569300 | 0.00355900  |
| C                                                                   | -2.76483400 | 0.68648600  | 0.00134200  |
| H                                                                   | -5.44082300 | -0.56487300 | 0.00520000  |
| C                                                                   | -3.30426500 | -0.65755800 | 0.00223300  |
| N                                                                   | -2.50764300 | -1.72390800 | 0.00133700  |
| N                                                                   | 2.66758600  | -1.69318900 | 0.00240500  |
| N                                                                   | 1.32412900  | 0.75235500  | 0.00029500  |
| C                                                                   | 2.76333700  | 3.15509100  | -0.00019900 |
| H                                                                   | 3.31558900  | 4.09026200  | -0.00048100 |
| N                                                                   | 4.84955900  | -2.15390300 | 0.00474800  |
| C                                                                   | 4.72409900  | -0.83720000 | 0.00340300  |
| C                                                                   | 0.60362300  | 4.36192100  | -0.00062700 |
| H                                                                   | 1.12323700  | 5.31600100  | -0.00093300 |
| C                                                                   | -0.79486300 | 4.34554500  | -0.00033900 |
| H                                                                   | -1.33841400 | 5.28614300  | -0.00041200 |
| N                                                                   | 3.62183000  | -2.59679300 | 0.00431200  |
| H                                                                   | 3.44116300  | -3.59402300 | 0.00522700  |
| N                                                                   | -3.24703200 | -2.83834600 | 0.00222600  |
| N                                                                   | -4.58304000 | -1.10171600 | 0.00405500  |
| C                                                                   | -4.50677200 | -2.45447200 | 0.00423600  |
| H                                                                   | -5.36501100 | -3.11283800 | 0.00550900  |
| Eu                                                                  | 0.01057500  | -1.51469800 | -0.00404200 |
| EuR <sub>5</sub> PhR <sub>7</sub> <sup>3+</sup> (PBE0/6-311G*-RECP) |             |             |             |
| C                                                                   | 0.73763000  | 1.89787400  | -0.00010200 |

|    |             |             |             |
|----|-------------|-------------|-------------|
| C  | 2.72607900  | 0.71233200  | -0.00009600 |
| C  | 3.48748500  | 1.89478600  | -0.00039600 |
| H  | 4.57003200  | 1.85087000  | -0.00057100 |
| C  | -0.72913600 | 1.89517400  | 0.00002400  |
| C  | -1.43157100 | 3.12977300  | 0.00027300  |
| C  | -2.84814900 | 3.08490200  | 0.00049900  |
| C  | -3.48587000 | 1.86909300  | 0.00047100  |
| H  | -3.42015700 | 4.00821200  | 0.00071800  |
| H  | -4.56726100 | 1.79117800  | 0.00065400  |
| N  | -1.35359500 | 0.71989200  | -0.00005900 |
| C  | 1.42820200  | 3.14198300  | -0.00020600 |
| C  | 3.36355300  | -0.58631300 | 0.00026600  |
| H  | 5.62094500  | -0.32591600 | 0.00060500  |
| C  | -2.70601700 | 0.70191200  | 0.00017900  |
| C  | -3.32009100 | -0.61197000 | 0.00018200  |
| N  | -2.61154200 | -1.78952600 | 0.00005600  |
| N  | 2.65013200  | -1.73629000 | 0.00048700  |
| N  | 1.36873200  | 0.72696600  | -0.00006200 |
| C  | 2.84409300  | 3.10601300  | -0.00043700 |
| H  | 3.41105000  | 4.03239700  | -0.00061400 |
| N  | 4.81960900  | -2.25494700 | 0.00094800  |
| C  | 4.72854500  | -0.93485700 | 0.00059300  |
| C  | 0.69688000  | 4.34042000  | -0.00004600 |
| H  | 1.22270800  | 5.29116400  | -0.00012300 |
| C  | -0.70754600 | 4.33526500  | 0.00023800  |
| H  | -1.24044700 | 5.28213000  | 0.00041800  |
| N  | 3.58127100  | -2.66525700 | 0.00083600  |
| H  | 3.37557200  | -3.65715700 | 0.00106900  |
| C  | -3.56577500 | -2.70838400 | 0.00021400  |
| H  | -3.44536400 | -3.78298600 | 0.00020200  |
| N  | -4.75816500 | -2.09636100 | 0.00035700  |
| H  | -5.68287000 | -2.51413000 | 0.00048300  |
| N  | -4.62740700 | -0.78130800 | 0.00035900  |
| Eu | -0.01011600 | -1.49914200 | -0.00052800 |

EuR<sub>5</sub>PhR<sub>8</sub><sup>3+</sup>(PBE0/6-311G\*-RECP)

|   |             |            |             |
|---|-------------|------------|-------------|
| C | -0.70734300 | 1.90434800 | -0.00040900 |
| C | -2.70766800 | 0.73766400 | -0.00006200 |
| C | -3.45751500 | 1.92838500 | -0.00043500 |
| H | -4.54045600 | 1.89493600 | -0.00035500 |
| C | 0.76108700  | 1.89136900 | -0.00027600 |
| C | 1.46863300  | 3.12455600 | -0.00032200 |
| C | 2.88140900  | 3.06976700 | -0.00006900 |
| C | 3.51275200  | 1.84903500 | 0.00028500  |

|    |             |             |             |
|----|-------------|-------------|-------------|
| H  | 3.46110900  | 3.98825700  | -0.00013200 |
| H  | 4.59584800  | 1.80389600  | 0.00053900  |
| N  | 1.37878800  | 0.71469500  | -0.00008000 |
| C  | -1.38650000 | 3.15508000  | -0.00066000 |
| C  | -3.36147700 | -0.55205500 | 0.00049100  |
| H  | -5.61630600 | -0.26123700 | -0.00305800 |
| C  | 2.73348900  | 0.68205000  | 0.00028600  |
| H  | 5.43157700  | -0.42926500 | 0.00249000  |
| C  | 3.29813500  | -0.65144200 | 0.00074700  |
| N  | 2.56861400  | -1.77979700 | 0.00016700  |
| N  | -2.66455000 | -1.71259100 | 0.00273600  |
| N  | -1.34961000 | 0.73938900  | -0.00015700 |
| C  | -2.80294000 | 3.13265700  | -0.00072200 |
| H  | -3.36075200 | 4.06458600  | -0.00089500 |
| N  | -4.84109600 | -2.20045400 | 0.00068600  |
| C  | -4.73205700 | -0.88206700 | -0.00096000 |
| C  | -0.64751800 | 4.34966200  | -0.00079700 |
| H  | -1.16892600 | 5.30286000  | -0.00099000 |
| C  | 0.75329600  | 4.33700300  | -0.00064600 |
| H  | 1.29323800  | 5.27978900  | -0.00077700 |
| N  | -3.60821600 | -2.62789400 | 0.00288200  |
| H  | -3.41631900 | -3.62292700 | 0.00520600  |
| N  | 4.59695800  | -1.00358100 | 0.00159000  |
| C  | 3.49674500  | -2.76342500 | 0.00082300  |
| H  | 3.27798300  | -3.82196200 | 0.00059300  |
| N  | 4.74195100  | -2.31537700 | 0.00166900  |
| Eu | -0.00527000 | -1.50436800 | -0.00083700 |

EuR<sub>6</sub>PhR<sub>6</sub><sup>3+</sup>(PBE0/6-311G\*-RECP)

|   |             |             |             |
|---|-------------|-------------|-------------|
| C | 0.73305200  | 1.91688200  | 0.01671500  |
| C | 2.71797100  | 0.73211300  | -0.03599500 |
| C | 3.48366800  | 1.90684600  | -0.04274200 |
| H | 4.56691800  | 1.87221000  | -0.06955200 |
| C | -0.73216300 | 1.91705600  | 0.01528400  |
| C | -1.42425600 | 3.15986500  | 0.00484100  |
| C | -2.83652500 | 3.12079300  | -0.02390000 |
| C | -3.48270800 | 1.90777400  | -0.05550500 |
| H | -3.40491300 | 4.04619400  | -0.02839000 |
| H | -4.56581700 | 1.87336900  | -0.08761900 |
| N | -1.36274100 | 0.74658700  | 0.00228000  |
| C | 1.42521900  | 3.15937900  | 0.00677900  |
| C | 3.28173900  | -0.60105600 | -0.08515700 |
| H | 5.41143200  | -0.46117000 | -0.20851600 |
| H | 5.38913300  | -3.01047600 | -0.26074000 |

|    |             |             |             |
|----|-------------|-------------|-------------|
| C  | -2.71718700 | 0.73278000  | -0.04480200 |
| H  | -5.41192500 | -0.45948100 | -0.19407800 |
| H  | -5.39159600 | -3.00898200 | -0.23570400 |
| C  | -3.28127300 | -0.60014100 | -0.08958500 |
| N  | -2.50824400 | -1.68562700 | -0.07187700 |
| N  | 2.50856200  | -1.68588400 | -0.06317100 |
| N  | 1.36345800  | 0.74618600  | 0.00851100  |
| C  | 2.83748900  | 3.12012600  | -0.01551200 |
| H  | 3.40609200  | 4.04540400  | -0.01843200 |
| N  | 3.26988500  | -2.78312800 | -0.13139900 |
| N  | -3.27109100 | -2.78249000 | -0.12615600 |
| C  | 4.51888900  | -2.37129800 | -0.19615300 |
| C  | -4.52046900 | -2.37006800 | -0.18086100 |
| N  | 4.56686600  | -1.01701400 | -0.16775300 |
| N  | -4.56728400 | -1.01565300 | -0.15966200 |
| C  | -0.69509500 | 4.36725400  | 0.01452300  |
| H  | -1.22856800 | 5.31336700  | 0.01433500  |
| C  | 0.69609600  | 4.36704400  | 0.01641700  |
| H  | 1.22982100  | 5.31301700  | 0.02018900  |
| Eu | -0.00036700 | -1.52343500 | 0.16201600  |

EuR<sub>6</sub>PhR<sub>7</sub><sup>3+</sup>(PBE0/6-311G\*-RECP)

|   |             |             |             |
|---|-------------|-------------|-------------|
| C | -0.79565300 | 1.89983300  | 0.00919200  |
| C | -2.76430200 | 0.68917300  | -0.03608700 |
| C | -3.54678000 | 1.85204600  | -0.04589600 |
| H | -4.62947900 | 1.80249400  | -0.07091200 |
| C | 0.67013000  | 1.91321100  | 0.01299900  |
| C | 1.35255900  | 3.15956300  | 0.00804700  |
| C | 2.77004400  | 3.13597000  | -0.00549200 |
| C | 3.42471800  | 1.93098900  | -0.02487600 |
| H | 3.32799300  | 4.06775400  | -0.00631900 |
| H | 4.50692900  | 1.86924500  | -0.04463600 |
| N | 1.31099800  | 0.74543500  | 0.00733900  |
| C | -1.50489000 | 3.13378900  | 0.00038500  |
| C | -3.30120000 | -0.65512900 | -0.06727300 |
| H | -5.43618200 | -0.56095300 | -0.14139300 |
| H | -5.36105000 | -3.10896700 | -0.16827200 |
| C | 2.66305000  | 0.74972900  | -0.02164400 |
| H | 5.71239700  | -2.39140700 | -0.19024900 |
| C | 3.30469600  | -0.55008300 | -0.05953400 |
| N | 2.62681300  | -1.74547000 | -0.05810200 |
| N | -2.50450800 | -1.72222200 | -0.05361300 |
| N | -1.40886800 | 0.72359100  | -0.00054500 |
| C | -2.91688000 | 3.07514400  | -0.02279900 |

|    |             |             |             |
|----|-------------|-------------|-------------|
| H  | -3.49836800 | 3.99243600  | -0.02746400 |
| N  | -3.24422200 | -2.83555200 | -0.09058900 |
| C  | -4.50338700 | -2.45107300 | -0.13000700 |
| N  | -4.57943600 | -1.09870100 | -0.11670900 |
| C  | 0.61125500  | 4.35563300  | 0.01292600  |
| H  | 1.13358900  | 5.30822800  | 0.01615800  |
| C  | -0.78806700 | 4.34508700  | 0.00841100  |
| H  | -1.32646300 | 5.28857000  | 0.00660500  |
| C  | 3.60157800  | -2.63936800 | -0.11452600 |
| H  | 3.50653300  | -3.71644400 | -0.13367300 |
| N  | 4.77856200  | -1.99696300 | -0.14604900 |
| N  | 4.61615600  | -0.68679100 | -0.11225700 |
| Eu | 0.01959400  | -1.52224300 | 0.12080700  |

EuR<sub>6</sub>PhR<sub>8</sub><sup>3+</sup>(PBE0/6-311G\*-RECP)

|   |             |             |             |
|---|-------------|-------------|-------------|
| C | -0.76397800 | 1.90668400  | -0.01141500 |
| C | -2.74296800 | 0.71249800  | 0.05022400  |
| C | -3.51463600 | 1.88320700  | 0.06555800  |
| H | -4.59751800 | 1.84334500  | 0.10016000  |
| C | 0.70164700  | 1.90964400  | -0.01773500 |
| C | 1.39002600  | 3.15307300  | -0.01191400 |
| C | 2.80365800  | 3.11711800  | 0.00231700  |
| C | 3.45065000  | 1.90604200  | 0.02693800  |
| H | 3.37095700  | 4.04322700  | 0.00089300  |
| H | 4.53411000  | 1.87613500  | 0.04654200  |
| N | 1.33483900  | 0.73873300  | -0.01102500 |
| C | -1.46194700 | 3.14658100  | 0.00188800  |
| C | -3.29357000 | -0.62561100 | 0.08947200  |
| H | -5.42649000 | -0.51156200 | 0.18891700  |
| H | -5.37510600 | -3.06029200 | 0.21891800  |
| C | 2.68816600  | 0.72631400  | 0.02677400  |
| C | 3.27619000  | -0.59602700 | 0.07909200  |
| N | 2.57044100  | -1.74010000 | 0.07190300  |
| N | -2.50718600 | -1.70160700 | 0.06862200  |
| N | -1.38792500 | 0.73479100  | 0.00175700  |
| C | -2.87440000 | 3.09997200  | 0.03486400  |
| H | -3.44768900 | 4.02239900  | 0.04251200  |
| N | -3.25646000 | -2.80721900 | 0.11538400  |
| C | -4.51177800 | -2.41039700 | 0.16909800  |
| N | -4.57485100 | -1.05719800 | 0.15460400  |
| C | 0.65735600  | 4.35753300  | -0.01752600 |
| H | 1.18761300  | 5.30557900  | -0.02325300 |
| C | -0.73689900 | 4.35483200  | -0.00911400 |
| H | -1.27121500 | 5.30057600  | -0.00529400 |

|    |            |             |             |
|----|------------|-------------|-------------|
| C  | 3.51555600 | -2.70331900 | 0.15430300  |
| H  | 3.31688000 | -3.76571500 | 0.17387200  |
| N  | 4.57984300 | -0.92066100 | 0.16125700  |
| H  | 5.40159200 | -0.32912300 | 0.19341800  |
| N  | 4.75016500 | -2.22861200 | 0.20935000  |
| Eu | 0.00391100 | -1.51556100 | -0.16089800 |

EuR<sub>7</sub>PhR<sub>7</sub><sup>3+</sup>(PBE0/6-311G\*-RECP)

|    |             |             |             |
|----|-------------|-------------|-------------|
| C  | 0.73258000  | 1.89617600  | -0.00013200 |
| C  | 2.70880800  | 0.70577800  | -0.00021800 |
| C  | 3.48754600  | 1.87465900  | -0.00031200 |
| H  | 4.56893400  | 1.79764500  | -0.00042400 |
| C  | -0.73258000 | 1.89617600  | -0.00005000 |
| C  | -1.43217000 | 3.13304400  | -0.00006300 |
| C  | -2.84927800 | 3.08988800  | 0.00010900  |
| C  | -3.48754600 | 1.87466000  | 0.00029400  |
| H  | -3.42047700 | 4.01364800  | 0.00003500  |
| H  | -4.56893400 | 1.79764600  | 0.00049200  |
| N  | -1.35652600 | 0.72131300  | 0.00006000  |
| C  | 1.43217000  | 3.13304400  | -0.00018100 |
| C  | 3.32461700  | -0.60703600 | -0.00007700 |
| C  | -2.70880800 | 0.70577800  | 0.00025100  |
| C  | -3.32461700 | -0.60703600 | 0.00033600  |
| N  | -2.61970800 | -1.78659400 | -0.00023600 |
| N  | 2.61970900  | -1.78659400 | 0.00058100  |
| N  | 1.35652600  | 0.72131200  | -0.00013500 |
| C  | 2.84927800  | 3.08988800  | -0.00028500 |
| H  | 3.42047700  | 4.01364800  | -0.00026600 |
| C  | 3.57623500  | -2.70200800 | 0.00036200  |
| H  | 3.45885200  | -3.77689900 | 0.00068000  |
| C  | -3.57623400 | -2.70200800 | 0.00017000  |
| H  | -3.45885200 | -3.77689900 | -0.00007600 |
| C  | 0.70280600  | 4.33419900  | -0.00025700 |
| H  | 1.23117200  | 5.28357500  | -0.00048900 |
| C  | -0.70280600 | 4.33419900  | -0.00008900 |
| H  | -1.23117200 | 5.28357500  | 0.00007600  |
| N  | 4.63319800  | -0.77249500 | -0.00013500 |
| N  | -4.63319800 | -0.77249500 | 0.00066000  |
| N  | -4.76769500 | -2.08669200 | 0.00101400  |
| H  | -5.69343400 | -2.50178200 | 0.00162400  |
| N  | 4.76769500  | -2.08669200 | -0.00034200 |
| H  | 5.69343500  | -2.50178200 | -0.00077100 |
| Eu | 0.00000000  | -1.51406700 | -0.00016400 |

EuR<sub>7</sub>PhR<sub>8</sub><sup>3+</sup>(PBE0/6-311G\*-RECP)

|    |             |             |             |
|----|-------------|-------------|-------------|
| C  | 0.70226600  | 1.90238100  | 0.00038000  |
| C  | 2.69017800  | 0.73024200  | -0.00078900 |
| C  | 3.45775900  | 1.90732500  | -0.00115300 |
| H  | 4.53988600  | 1.84042600  | -0.00193500 |
| C  | -0.76413900 | 1.89245100  | 0.00039300  |
| C  | -1.46863900 | 3.12793900  | 0.00009000  |
| C  | -2.88192200 | 3.07477700  | -0.00038600 |
| C  | -3.51404800 | 1.85464200  | -0.00091100 |
| H  | -3.46079900 | 3.99374000  | -0.00055000 |
| H  | -4.59716800 | 1.81067100  | -0.00148300 |
| N  | -1.38156300 | 0.71617600  | 0.00021900  |
| C  | 1.39073000  | 3.14589400  | 0.00007600  |
| C  | 3.32200400  | -0.57416700 | -0.00181200 |
| C  | -2.73604300 | 0.68594100  | -0.00075500 |
| C  | -3.30219600 | -0.64646500 | -0.00189000 |
| N  | -2.57626800 | -1.77713100 | -0.00266200 |
| N  | 2.63404400  | -1.76369300 | -0.00110200 |
| N  | 1.33722100  | 0.73313200  | 0.00022200  |
| C  | 2.80846700  | 3.11577100  | -0.00054100 |
| H  | 3.37078200  | 4.04497900  | -0.00066600 |
| C  | 3.60289300  | -2.66569900 | -0.00268900 |
| H  | 3.50056900  | -3.74225100 | -0.00246700 |
| C  | -3.50722800 | -2.75691000 | -0.00432700 |
| H  | -3.29178500 | -3.81608000 | -0.00548000 |
| C  | 0.65405900  | 4.34341000  | 0.00014800  |
| H  | 1.17814300  | 5.29515800  | 0.00003100  |
| C  | -0.74783100 | 4.33616500  | 0.00018000  |
| H  | -1.28305100 | 5.28159000  | 0.00015000  |
| N  | 4.63348700  | -0.72177200 | -0.00416300 |
| N  | 4.78604400  | -2.03315600 | -0.00480600 |
| H  | 5.71762100  | -2.43561500 | -0.00654400 |
| N  | -4.75199200 | -2.30545000 | -0.00462200 |
| N  | -4.60277300 | -0.99459700 | -0.00312200 |
| H  | -5.43521000 | -0.41733300 | -0.00268100 |
| Eu | 0.01548800  | -1.51860300 | 0.00390100  |

EuR<sub>8</sub>PhR<sub>8</sub><sup>3+</sup>(PBE0/6-311G\*-RECP)

|   |             |            |             |
|---|-------------|------------|-------------|
| C | -0.73352300 | 1.89858700 | 0.00002500  |
| C | -2.71699900 | 0.70963400 | 0.00054800  |
| C | -3.48384200 | 1.88642500 | 0.00050000  |
| H | -4.56736300 | 1.85269300 | 0.00065200  |
| C | 0.73352300  | 1.89858700 | -0.00015500 |
| C | 1.42686600  | 3.14034600 | -0.00008000 |



|    |             |             |             |
|----|-------------|-------------|-------------|
| C  | 2.84078400  | 3.09989500  | -0.00017700 |
| C  | 3.48384200  | 1.88642500  | -0.00034800 |
| H  | 3.41099900  | 4.02426300  | -0.00004300 |
| H  | 4.56736300  | 1.85269300  | -0.00038000 |
| N  | 1.36209000  | 0.72727900  | -0.00035800 |
| C  | -1.42686500 | 3.14034600  | -0.00005300 |
| C  | -3.29921400 | -0.61516500 | 0.00078600  |
| H  | -5.43009500 | -0.35990200 | 0.00373000  |
| C  | 2.71700000  | 0.70963300  | -0.00038000 |
| H  | 5.43009600  | -0.35990200 | -0.00269100 |
| C  | 3.29921400  | -0.61516600 | -0.00033600 |
| N  | 2.58788500  | -1.75578300 | 0.00103900  |
| N  | -2.58788600 | -1.75578300 | -0.00064300 |
| N  | -1.36209000 | 0.72727900  | 0.00032000  |
| C  | -2.84078400 | 3.09989500  | 0.00015200  |
| H  | -3.41099800 | 4.02426400  | -0.00000800 |
| N  | -4.60451200 | -0.94723000 | 0.00193600  |
| N  | 4.60451300  | -0.94723000 | -0.00107100 |
| C  | -3.53049700 | -2.72366400 | -0.00034100 |
| H  | -3.32887400 | -3.78565900 | -0.00142400 |
| C  | 3.53049700  | -2.72366500 | 0.00115300  |
| H  | 3.32887400  | -3.78565900 | 0.00233100  |
| N  | -4.77002100 | -2.25543200 | 0.00123600  |
| N  | 4.77002100  | -2.25543200 | -0.00013300 |
| C  | -0.69860600 | 4.34547500  | -0.00011500 |
| H  | -1.23006900 | 5.29298600  | -0.00011800 |
| C  | 0.69860700  | 4.34547400  | -0.00010200 |
| H  | 1.23007000  | 5.29298600  | -0.00013800 |
| Eu | 0.00000000  | -1.51921900 | -0.00039200 |

AmR<sub>1</sub>PhR<sub>1</sub>(NO<sub>3</sub>)<sub>3</sub> (PBE0/6-311G\*-RECP)

|   |            |             |             |
|---|------------|-------------|-------------|
| C | 2.73009800 | -0.72239800 | -0.12004900 |
| C | 1.52967300 | -2.68639600 | -0.20698400 |
| C | 2.70943600 | -3.45286500 | -0.22661600 |
| H | 2.65167200 | -4.53386600 | -0.27537700 |
| C | 2.73053700 | 0.72109400  | -0.12018100 |
| C | 3.96578700 | 1.40669600  | -0.13457400 |
| C | 3.92114000 | 2.81142900  | -0.18002900 |
| C | 2.71157600 | 3.45155400  | -0.22718600 |
| H | 4.84804200 | 3.37734600  | -0.18790700 |
| H | 2.65448200 | 4.53258300  | -0.27611600 |
| N | 1.54807100 | 1.35922800  | -0.13745300 |
| C | 3.96491900 | -1.40877100 | -0.13427700 |
| C | 0.21425000 | -3.31191700 | -0.26537600 |

|    |             |             |             |
|----|-------------|-------------|-------------|
| C  | -0.18609900 | -4.65857500 | -0.34099800 |
| H  | 0.42702300  | -5.54478700 | -0.38508000 |
| C  | -1.56446800 | -4.60930700 | -0.34151800 |
| H  | -2.30911600 | -5.38921100 | -0.38079900 |
| H  | -2.81852000 | -2.87530300 | -0.17872800 |
| C  | 1.53134000  | 2.68582600  | -0.20728400 |
| C  | -0.18316200 | 4.65911700  | -0.34113000 |
| C  | -1.56156000 | 4.61078400  | -0.34109700 |
| H  | 0.43053200  | 5.54491300  | -0.38561100 |
| H  | -2.81675200 | 2.87764900  | -0.17766600 |
| H  | -2.30568300 | 5.39119800  | -0.38019900 |
| C  | 0.21630400  | 3.31220300  | -0.26542600 |
| N  | -0.85185700 | 2.51837300  | -0.23061800 |
| N  | -0.85339900 | -2.51738000 | -0.23100300 |
| N  | 1.54724100  | -1.35980100 | -0.13726900 |
| C  | 3.91939400  | -2.81348700 | -0.17945300 |
| H  | 4.84594500  | -3.37998200 | -0.18714800 |
| N  | -1.90873900 | -3.31219400 | -0.27835700 |
| N  | -1.90669500 | 3.31392000  | -0.27761600 |
| N  | -0.02499700 | -0.00087500 | 2.96559300  |
| N  | -1.20103300 | -0.00061600 | -2.79641200 |
| N  | -3.69664800 | 0.00128500  | 0.61276200  |
| O  | -2.16811500 | -0.00068500 | -1.97528400 |
| O  | -1.36847000 | -0.00127500 | -3.98549700 |
| O  | -0.04025100 | 0.00018800  | -2.27784000 |
| O  | -0.20800000 | -1.07573600 | 2.31285000  |
| O  | -0.20598100 | 1.07466400  | 2.31338800  |
| O  | 0.30265900  | -0.00146900 | 4.12041000  |
| O  | -3.00874100 | -1.06361400 | 0.60767200  |
| O  | -3.00797300 | 1.06574000  | 0.60719300  |
| O  | -4.89287200 | 0.00174900  | 0.62890000  |
| C  | 5.19122000  | 0.67662000  | -0.11798800 |
| H  | 6.12568000  | 1.22956700  | -0.11483000 |
| C  | 5.19080200  | -0.67945300 | -0.11783300 |
| H  | 6.12492100  | -1.23297600 | -0.11454800 |
| Am | -0.75607400 | 0.00042000  | 0.11589800  |

AmR<sub>1</sub>PhR<sub>2</sub>(NO<sub>3</sub>)<sub>3</sub> (PBE0/6-311G\*-RECP)

|   |             |             |             |
|---|-------------|-------------|-------------|
| C | -2.78572600 | 0.37035000  | -0.05153200 |
| C | -1.85291500 | 2.48373000  | -0.06714500 |
| C | -3.12938400 | 3.08415300  | -0.08555200 |
| H | -3.22023400 | 4.16388200  | -0.11244200 |
| C | -2.60419900 | -1.06396100 | -0.05992000 |
| C | -3.74743300 | -1.89630300 | -0.07710500 |

|    |             |             |             |
|----|-------------|-------------|-------------|
| C  | -3.53398500 | -3.28687100 | -0.07110800 |
| C  | -2.25881300 | -3.77913700 | -0.02831200 |
| H  | -4.38745200 | -3.95848000 | -0.08795400 |
| H  | -2.07264800 | -4.84627600 | -0.00116100 |
| N  | -1.35241800 | -1.55995700 | -0.04477800 |
| C  | -4.09952900 | 0.88939600  | -0.07530500 |
| C  | -0.64675600 | 3.29316300  | -0.12812600 |
| C  | -0.48901700 | 4.65824800  | -0.12433500 |
| H  | -1.18670700 | 5.47698100  | -0.05376800 |
| H  | 1.31813000  | 5.75773600  | -0.25238200 |
| C  | -1.17632400 | -2.87838700 | -0.00665300 |
| C  | 0.74699200  | -4.65636500 | 0.06491200  |
| C  | 2.10245500  | -4.45650100 | 0.21517600  |
| H  | 0.24568400  | -5.60399200 | -0.05509100 |
| H  | 3.13363800  | -2.57873100 | 0.44301900  |
| H  | 2.92938000  | -5.14859700 | 0.25256100  |
| C  | 0.19617400  | -3.35883100 | 0.09221200  |
| N  | 1.15729500  | -2.45664400 | 0.25237900  |
| N  | 0.58116300  | 2.69576500  | -0.23412300 |
| N  | -1.69582400 | 1.16438800  | -0.02695900 |
| C  | -4.24063300 | 2.29008500  | -0.08056900 |
| H  | -5.23498600 | 2.72679100  | -0.09389300 |
| N  | 2.28846600  | -3.12723200 | 0.32184800  |
| C  | -5.05472400 | -1.32981400 | -0.09670600 |
| H  | -5.91092400 | -1.99745500 | -0.11115400 |
| C  | -5.22449400 | 0.01530800  | -0.09623700 |
| H  | -6.21984600 | 0.44898300  | -0.11223500 |
| C  | 1.46471100  | 3.65454600  | -0.29187800 |
| H  | 2.53072100  | 3.50926300  | -0.37879400 |
| N  | 0.85687100  | 4.86410600  | -0.22892300 |
| Am | 0.76251400  | 0.11253400  | 0.03702500  |
| N  | 3.76658900  | 0.35215900  | 0.02159900  |
| O  | 4.96361700  | 0.39446600  | -0.04428500 |
| O  | 3.01979100  | 1.23195000  | -0.49031100 |
| O  | 3.15601800  | -0.59247900 | 0.62188700  |
| N  | 0.75471300  | -0.23655000 | -2.87946800 |
| O  | 1.37471500  | -1.02253200 | -2.09562400 |
| O  | 0.10263000  | 0.68915100  | -2.30572200 |
| O  | 0.77926900  | -0.36544800 | -4.07076500 |
| N  | 0.38172500  | 0.40853500  | 2.93551700  |
| O  | 0.22957000  | 0.54272400  | 4.11664800  |
| O  | 0.66391000  | 1.38709500  | 2.17015400  |
| O  | 0.26897500  | -0.71113900 | 2.35243700  |

AmR<sub>1</sub>PhR<sub>3</sub>(NO<sub>3</sub>)<sub>3</sub> (PBE0/6-311G\*-RECP)

|    |             |             |             |
|----|-------------|-------------|-------------|
| C  | -2.79931400 | -0.31203500 | -0.08925500 |
| C  | -1.89103700 | -2.42604700 | -0.17544000 |
| C  | -3.16809900 | -3.01941700 | -0.19917800 |
| H  | -3.28361200 | -4.09596400 | -0.26274800 |
| C  | -2.59587500 | 1.11843000  | -0.07716700 |
| C  | -3.72545900 | 1.96773200  | -0.07563000 |
| C  | -3.48832800 | 3.35414900  | -0.06894000 |
| C  | -2.20229100 | 3.82191900  | -0.05215900 |
| H  | -4.32887400 | 4.04191800  | -0.07015500 |
| H  | -1.99554100 | 4.88555500  | -0.03285800 |
| N  | -1.33755400 | 1.58611000  | -0.07346800 |
| C  | -4.12041000 | -0.81705700 | -0.11183000 |
| C  | -0.67041900 | -3.20506200 | -0.28146700 |
| H  | -1.33390600 | -5.21440000 | -0.20968500 |
| C  | 0.74150100  | -4.88648200 | -0.43928900 |
| H  | 1.07742100  | -5.91006200 | -0.47829500 |
| H  | 2.47472300  | -3.51088800 | -0.57895900 |
| C  | -1.13874600 | 2.89917800  | -0.04755100 |
| C  | 0.83705600  | 4.61888700  | -0.00053800 |
| C  | 2.18891300  | 4.37684200  | 0.12732800  |
| H  | 0.36075900  | 5.58201700  | -0.09529500 |
| H  | 3.16698700  | 2.47235300  | 0.35343900  |
| H  | 3.03577200  | 5.04432200  | 0.16660000  |
| C  | 0.24882000  | 3.33995900  | 0.01726900  |
| N  | 1.18688800  | 2.40535000  | 0.14518400  |
| N  | 0.52998600  | -2.66830500 | -0.39749100 |
| N  | -1.72123200 | -1.11206900 | -0.09532300 |
| C  | -4.27407300 | -2.21365100 | -0.15434200 |
| H  | -5.27151700 | -2.64276600 | -0.16834300 |
| N  | 2.33990700  | 3.04380900  | 0.20722200  |
| C  | -5.04119300 | 1.41705600  | -0.08319700 |
| H  | -5.88843300 | 2.09620700  | -0.07714400 |
| C  | -5.23260000 | 0.07474000  | -0.10077900 |
| H  | -6.23505200 | -0.34224800 | -0.11087300 |
| C  | 1.41620700  | -3.69659200 | -0.49351300 |
| N  | -0.57909600 | -4.55782000 | -0.30681600 |
| Am | 0.80369300  | -0.13537700 | 0.04906000  |
| N  | 0.99906700  | 0.29731300  | -2.84137400 |
| O  | 1.06911100  | 0.46944200  | -4.02597400 |
| O  | 1.93845200  | 0.61320200  | -2.04975900 |
| O  | -0.02942300 | -0.21271500 | -2.29010700 |
| N  | 0.07917800  | -0.46607700 | 2.89443400  |
| O  | 0.44532700  | -1.44092600 | 2.16375500  |

|   |             |             |             |
|---|-------------|-------------|-------------|
| O | 0.06736200  | 0.66653700  | 2.32350000  |
| O | -0.24209000 | -0.61206400 | 4.04172300  |
| N | 3.74959600  | -0.44607900 | 0.40807500  |
| O | 3.13459900  | 0.58504800  | 0.83797300  |
| O | 4.94371200  | -0.53596900 | 0.43778900  |
| O | 3.00237000  | -1.35707700 | -0.04457500 |

AmR<sub>1</sub>PhR<sub>4</sub>(NO<sub>3</sub>)<sub>3</sub> (PBE0/6-311G\*-RECP)

|    |             |             |             |
|----|-------------|-------------|-------------|
| C  | 2.76497900  | -0.33776400 | 0.01223500  |
| C  | 1.89351700  | -2.46713300 | -0.03929700 |
| C  | 3.17072500  | -3.04194200 | 0.09691600  |
| H  | 3.28662700  | -4.11949100 | 0.12753400  |
| C  | 2.54872100  | 1.08877800  | -0.06923000 |
| C  | 3.66664900  | 1.95251300  | -0.05379300 |
| C  | 3.41767200  | 3.32941200  | -0.19934200 |
| C  | 2.13390900  | 3.77614300  | -0.36515300 |
| H  | 4.24973600  | 4.02737800  | -0.19180100 |
| H  | 1.92358600  | 4.83069700  | -0.49953600 |
| N  | 1.28993900  | 1.54278300  | -0.18686200 |
| C  | 4.08627400  | -0.82324900 | 0.13857100  |
| C  | 0.69929800  | -3.29279700 | -0.17206000 |
| C  | 0.51860800  | -4.65522400 | -0.22828300 |
| H  | 1.18822200  | -5.49780000 | -0.17880300 |
| H  | -1.35690200 | -5.63553600 | -0.45615700 |
| C  | 1.07876500  | 2.84436300  | -0.35332700 |
| C  | -0.90969100 | 4.53008500  | -0.60765600 |
| C  | -2.26196000 | 4.26914800  | -0.67708300 |
| H  | -0.44112600 | 5.50156800  | -0.60595700 |
| H  | -3.23881600 | 2.36415200  | -0.55908700 |
| H  | -3.11567900 | 4.92578500  | -0.74247400 |
| C  | -0.31024500 | 3.25932900  | -0.51851700 |
| N  | -1.24264300 | 2.31005800  | -0.55019300 |
| N  | -0.52980400 | -2.72005400 | -0.28844800 |
| N  | 1.70215800  | -1.15700600 | -0.06613100 |
| C  | 4.25959300  | -2.21769200 | 0.19109400  |
| H  | 5.25866500  | -2.62969200 | 0.29771100  |
| N  | -2.40318900 | 2.93219400  | -0.64315100 |
| C  | 4.98240100  | 1.42223000  | 0.09471000  |
| H  | 5.82083200  | 2.11170600  | 0.12195300  |
| C  | 5.18467300  | 0.08508800  | 0.19283800  |
| H  | 6.18732300  | -0.31687400 | 0.30232100  |
| N  | -1.43946800 | -3.62377700 | -0.41098800 |
| N  | -0.81399500 | -4.79061800 | -0.37665300 |
| Am | -0.78284300 | -0.13820300 | 0.03039300  |

|   |             |             |             |
|---|-------------|-------------|-------------|
| N | -0.15384700 | 0.45693200  | 2.84616900  |
| O | 0.08417500  | 0.65627100  | 4.00528300  |
| O | -0.87129800 | 1.23486600  | 2.15203800  |
| O | 0.31530500  | -0.55293100 | 2.22614300  |
| N | -3.49932300 | -0.40362800 | 1.10803300  |
| O | -4.60614600 | -0.46483400 | 1.56022200  |
| O | -2.58616600 | -1.22609600 | 1.39596600  |
| O | -3.15506300 | 0.51189200  | 0.28635000  |
| N | -0.99642800 | -0.45250600 | -2.88470600 |
| O | 0.11706400  | -0.23122500 | -2.31272100 |
| O | -2.00250800 | -0.50302200 | -2.11404800 |
| O | -1.08655900 | -0.60254000 | -4.07276400 |

AmR<sub>1</sub>PhR<sub>5</sub>(NO<sub>3</sub>)<sub>3</sub> (PBE0/6-311G\*-RECP)

|   |             |             |             |
|---|-------------|-------------|-------------|
| C | -2.76019100 | -0.61131200 | -0.06397600 |
| C | -1.65092700 | -2.62906200 | -0.16730000 |
| C | -2.86089700 | -3.34427000 | -0.20695100 |
| H | -2.85088800 | -4.42569100 | -0.27933000 |
| C | -2.70127200 | 0.83273600  | -0.03527900 |
| C | -3.91069600 | 1.56402400  | -0.01750500 |
| C | -3.81726700 | 2.96675100  | 0.01175300  |
| C | -2.58664500 | 3.56595800  | 0.02897100  |
| H | -4.72453400 | 3.56346700  | 0.02538600  |
| H | -2.49121100 | 4.64485100  | 0.06271300  |
| N | -1.49749200 | 1.43166000  | -0.03333600 |
| C | -4.02360200 | -1.24545400 | -0.09776400 |
| C | -0.36580700 | -3.30910800 | -0.25303900 |
| C | 0.02639200  | -4.65581200 | -0.24075900 |
| H | -0.55668100 | -5.56088700 | -0.17081100 |
| H | 2.67730200  | -3.13679800 | -0.39964400 |
| C | -1.43448000 | 2.75880800  | 0.00948400  |
| C | 0.35392700  | 4.67471900  | 0.05360600  |
| C | 1.72736300  | 4.57304500  | 0.13346200  |
| H | -0.22265100 | 5.58467000  | -0.00042400 |
| H | 2.90958200  | 2.78339900  | 0.26537800  |
| H | 2.50052700  | 5.32504700  | 0.16360000  |
| C | -0.09812800 | 3.34187500  | 0.05548500  |
| N | 0.93641400  | 2.50872600  | 0.13052000  |
| N | 0.74520300  | -2.58181800 | -0.35017700 |
| N | -1.60797100 | -1.30450700 | -0.07232900 |
| C | -4.04046400 | -2.65016700 | -0.15942300 |
| H | -4.99175400 | -3.17341600 | -0.18340600 |
| N | 2.01970700  | 3.26185000  | 0.17403800  |
| C | -5.16474300 | 0.88467900  | -0.03374800 |

|    |             |             |             |
|----|-------------|-------------|-------------|
| H  | -6.07558700 | 1.47545600  | -0.01664100 |
| C  | -5.21985900 | -0.46902200 | -0.07495300 |
| H  | -6.17515000 | -0.98456400 | -0.09394300 |
| N  | 1.71481000  | -3.45554000 | -0.38293100 |
| N  | 1.35212200  | -4.71154600 | -0.32047500 |
| Am | 0.76974000  | -0.02241800 | 0.02922700  |
| N  | 0.32530500  | -0.43241000 | 2.91398200  |
| O  | 0.14014900  | -0.60570400 | 4.08532100  |
| O  | 0.81645200  | -1.33427600 | 2.16245200  |
| O  | 0.03790700  | 0.66027000  | 2.33326600  |
| N  | 3.74970000  | -0.17712700 | 0.28086900  |
| O  | 3.09753000  | 0.83408800  | 0.68788900  |
| O  | 3.03096500  | -1.13307500 | -0.14229400 |
| O  | 4.94448000  | -0.22571700 | 0.29708500  |
| N  | 0.88562900  | 0.36731200  | -2.86688300 |
| O  | -0.07656300 | -0.23883500 | -2.29089600 |
| O  | 1.80032600  | 0.78741500  | -2.09404200 |
| O  | 0.91819900  | 0.53053400  | -4.05313200 |

AmR<sub>1</sub>PhR<sub>6</sub>(NO<sub>3</sub>)<sub>3</sub> (PBE0/6-311G\*-RECP)

|   |             |             |             |
|---|-------------|-------------|-------------|
| C | -2.76894800 | -0.01455800 | 0.02385700  |
| C | -2.12949600 | -2.22453700 | 0.05543100  |
| C | -3.46332100 | -2.66194800 | 0.12380900  |
| H | -3.70356500 | -3.71731800 | 0.19454600  |
| C | -2.39153200 | 1.38137700  | 0.01281700  |
| C | -3.40907100 | 2.36051400  | 0.02930300  |
| C | -3.00563400 | 3.70779500  | -0.00950100 |
| C | -1.67456200 | 4.01573400  | -0.09216200 |
| H | -3.75591500 | 4.49272800  | 0.01070300  |
| H | -1.34334600 | 5.04596500  | -0.14928700 |
| N | -1.08667300 | 1.69468300  | -0.02585500 |
| C | -4.14117700 | -0.35705300 | 0.08462400  |
| C | -1.00125600 | -3.14356500 | 0.11582100  |
| H | -1.81588900 | -5.09217700 | -0.15617900 |
| C | 0.27417500  | -4.88232100 | 0.14723400  |
| H | 0.60406100  | -5.90901500 | 0.11001300  |
| C | -0.72861900 | 2.97198900  | -0.11099100 |
| C | 1.42963700  | 4.43630700  | -0.35849600 |
| C | 2.73428600  | 4.02894600  | -0.54090100 |
| H | 1.07594600  | 5.45332000  | -0.29287800 |
| H | 3.47051500  | 2.00474800  | -0.66762300 |
| H | 3.65015500  | 4.58730300  | -0.65708700 |
| C | 0.69511000  | 3.23767300  | -0.27298900 |
| N | 1.50881300  | 2.19365400  | -0.40048900 |

|    |             |             |             |
|----|-------------|-------------|-------------|
| N  | 0.24034400  | -2.75978000 | 0.29887800  |
| N  | -1.80091100 | -0.94280100 | -0.01863100 |
| C  | -4.46345300 | -1.72392300 | 0.12369900  |
| H  | -5.50478600 | -2.02773300 | 0.17291500  |
| N  | 2.72213100  | 2.68356700  | -0.55741600 |
| C  | -4.78114900 | 1.97311600  | 0.08157100  |
| H  | -5.53917700 | 2.75046700  | 0.09809100  |
| C  | -5.13602500 | 0.66468500  | 0.11046000  |
| H  | -6.18117300 | 0.37428200  | 0.15430200  |
| N  | 1.04388700  | -3.84444800 | 0.31610500  |
| N  | -1.02439400 | -4.49774100 | 0.02098100  |
| Am | 0.81241600  | -0.23946600 | -0.00511700 |
| N  | 0.23457300  | -0.64372100 | -2.87903600 |
| O  | -0.01812800 | -0.83103700 | -4.03766900 |
| O  | 0.62511300  | -1.58042400 | -2.11150400 |
| O  | 0.11897700  | 0.49125900  | -2.33003300 |
| N  | 3.70997200  | -0.72603700 | 0.28126100  |
| O  | 3.23378800  | 0.04009800  | -0.63578800 |
| O  | 4.89063700  | -0.84392800 | 0.44448900  |
| O  | 2.85021100  | -1.32137100 | 0.97837900  |
| N  | 0.42346900  | 0.40729300  | 2.84177400  |
| O  | 1.21535900  | 1.05727500  | 2.09133100  |
| O  | 0.27995300  | 0.66764800  | 4.00381200  |
| O  | -0.21698900 | -0.52794700 | 2.26998900  |

AmR<sub>1</sub>PhR<sub>7</sub>(NO<sub>3</sub>)<sub>3</sub> (PBE0/6-311G\*-RECP)

|   |             |             |             |
|---|-------------|-------------|-------------|
| C | -2.79844600 | -0.38863700 | -0.08877700 |
| C | -1.84842800 | -2.47794500 | -0.18060100 |
| C | -3.10253000 | -3.11153900 | -0.19905800 |
| H | -3.15007700 | -4.19246600 | -0.25296400 |
| C | -2.63033700 | 1.04544600  | -0.07157500 |
| C | -3.78109300 | 1.86606900  | -0.06238900 |
| C | -3.58049400 | 3.25779800  | -0.04890700 |
| C | -2.30717600 | 3.76005000  | -0.03399400 |
| H | -4.43904000 | 3.92294800  | -0.04358200 |
| H | -2.12878300 | 4.82867100  | -0.00974700 |
| N | -1.38388200 | 1.54777600  | -0.07004800 |
| C | -4.10436400 | -0.92998700 | -0.10880200 |
| C | -0.61510800 | -3.24994000 | -0.28038500 |
| H | 1.11709800  | -5.72615300 | -0.42954300 |
| H | 2.52109700  | -3.53747700 | -0.50163700 |
| C | -1.22016600 | 2.86603500  | -0.03843800 |
| C | 0.71040400  | 4.63781300  | 0.00062900  |



|    |             |             |             |
|----|-------------|-------------|-------------|
| C  | 2.06961500  | 4.43174700  | 0.11437600  |
| H  | 0.20775800  | 5.58814500  | -0.08659100 |
| H  | 3.10255900  | 2.55569900  | 0.31882600  |
| H  | 2.89844600  | 5.12182900  | 0.14700200  |
| C  | 0.15620700  | 3.34402900  | 0.01977800  |
| N  | 1.12053200  | 2.43477900  | 0.13583800  |
| N  | 0.59223900  | -2.63684800 | -0.37388900 |
| N  | -1.69963200 | -1.16400500 | -0.10192000 |
| C  | -4.22662200 | -2.33127200 | -0.15188400 |
| H  | -5.21476600 | -2.78166500 | -0.16069700 |
| N  | 2.25747100  | 3.10320000  | 0.18865300  |
| C  | -5.08196400 | 1.28117600  | -0.06893400 |
| H  | -5.94649400 | 1.93815000  | -0.05767300 |
| C  | -5.23860600 | -0.06539900 | -0.09164700 |
| H  | -6.23010100 | -0.50772200 | -0.10041100 |
| N  | -0.55262800 | -4.56580200 | -0.29860000 |
| C  | 1.44751000  | -3.63196600 | -0.44157500 |
| N  | 0.76469500  | -4.78388400 | -0.40236100 |
| Am | 0.79115600  | -0.09802700 | 0.04504500  |
| N  | 0.16365800  | -0.46406400 | 2.90547400  |
| O  | -0.10013200 | -0.62230000 | 4.06466700  |
| O  | 0.55934400  | -1.41921600 | 2.16290800  |
| O  | 0.06076000  | 0.66274000  | 2.33097200  |
| N  | 3.74654700  | -0.38977800 | 0.38489400  |
| O  | 3.00363500  | -1.31645100 | -0.04724300 |
| O  | 3.12695600  | 0.64557100  | 0.79242700  |
| O  | 4.94102000  | -0.47465900 | 0.41475400  |
| N  | 1.01209000  | 0.29273900  | -2.84863700 |
| O  | 1.09356800  | 0.44495800  | -4.03491500 |
| O  | -0.00808900 | -0.23842200 | -2.30126900 |
| O  | 1.93099500  | 0.65064400  | -2.05042100 |

AmR<sub>1</sub>PhR<sub>8</sub>(NO<sub>3</sub>)<sub>3</sub> (PBE0/6-311G\*-RECP)

|   |             |             |            |
|---|-------------|-------------|------------|
| C | -2.80094400 | -0.30787700 | 0.09086700 |
| C | -1.90450600 | -2.42317400 | 0.16908600 |
| C | -3.17768900 | -3.01711200 | 0.20411700 |
| H | -3.29070900 | -4.09380600 | 0.26842600 |
| C | -2.59098700 | 1.12195200  | 0.07363100 |
| C | -3.71794000 | 1.97381900  | 0.07322400 |
| C | -3.47749200 | 3.35963400  | 0.05764100 |
| C | -2.19015900 | 3.82353300  | 0.03243300 |
| H | -4.31596500 | 4.04982500  | 0.05895500 |
| H | -1.98088400 | 4.88648200  | 0.00664000 |

|    |             |             |             |
|----|-------------|-------------|-------------|
| N  | -1.33127000 | 1.58539500  | 0.06299200  |
| C  | -4.12360700 | -0.81120000 | 0.12195100  |
| C  | -0.67710000 | -3.20215100 | 0.26212500  |
| H  | -1.24907100 | -5.25314400 | 0.17592000  |
| H  | 2.42614700  | -3.63787700 | 0.53708600  |
| C  | -1.12866300 | 2.89818600  | 0.02939000  |
| C  | 0.84912800  | 4.61457100  | -0.02986100 |
| C  | 2.20127800  | 4.37033900  | -0.14964700 |
| H  | 0.37362800  | 5.57911400  | 0.05354900  |
| H  | 3.18030500  | 2.46371000  | -0.34816700 |
| H  | 3.04878300  | 5.03682900  | -0.19115100 |
| C  | 0.25971600  | 3.33614700  | -0.03806900 |
| N  | 1.19791900  | 2.39969200  | -0.15348500 |
| N  | 0.52629400  | -2.66864900 | 0.38160900  |
| N  | -1.72696000 | -1.11218900 | 0.09136800  |
| C  | -4.28237900 | -2.20647700 | 0.16756900  |
| H  | -5.28101800 | -2.63203900 | 0.18943900  |
| N  | 2.35162800  | 3.03645000  | -0.21667400 |
| C  | -5.03525200 | 1.42602900  | 0.09031500  |
| H  | -5.88027400 | 2.10796900  | 0.08598400  |
| C  | -5.23295600 | 0.08487400  | 0.11454500  |
| H  | -6.23699000 | -0.32762400 | 0.13178100  |
| N  | 0.73850200  | -4.89621700 | 0.38873000  |
| N  | -0.54781500 | -4.53848900 | 0.27092000  |
| C  | 1.35562000  | -3.73539700 | 0.45032800  |
| Am | 0.81388000  | -0.13232300 | -0.04692700 |
| N  | 0.08295700  | -0.46309200 | -2.88965400 |
| O  | -0.24481600 | -0.61120000 | -4.03397500 |
| O  | 0.10399200  | 0.67381300  | -2.32809400 |
| O  | 0.42429500  | -1.44144500 | -2.14976000 |
| N  | 0.96158500  | 0.28954100  | 2.84532800  |
| O  | 1.00968600  | 0.45931200  | 4.03051500  |
| O  | 1.90536200  | 0.62668300  | 2.06785100  |
| O  | -0.04867200 | -0.23955400 | 2.27626500  |
| N  | 3.75270200  | -0.47984500 | -0.35878500 |
| O  | 4.94487400  | -0.58253100 | -0.37298100 |
| O  | 3.15391400  | 0.56037500  | -0.79288800 |
| O  | 2.98789100  | -1.38434100 | 0.07998100  |

AmR<sub>2</sub>PhR<sub>2</sub>(NO<sub>3</sub>)<sub>3</sub> (PBE0/6-311G\*-RECP)

|   |             |             |             |
|---|-------------|-------------|-------------|
| C | -2.69189600 | -0.72315500 | -0.00605300 |
| C | -1.49693500 | -2.69534700 | 0.05106700  |
| C | -2.68310300 | -3.45837400 | 0.03745700  |
| H | -2.63355300 | -4.54076000 | 0.07191500  |

|    |             |             |             |
|----|-------------|-------------|-------------|
| C  | -2.69244700 | 0.72109100  | 0.00533100  |
| C  | -3.92965700 | 1.40343100  | 0.00522600  |
| C  | -3.88979500 | 2.81090900  | 0.00091000  |
| C  | -2.68574300 | 3.45634100  | -0.03816200 |
| H  | -4.81970100 | 3.37214100  | 0.00996600  |
| H  | -2.63701700 | 4.53876500  | -0.07258900 |
| N  | -1.51166200 | 1.36802500  | 0.00264100  |
| C  | -3.92858200 | -1.40643300 | -0.00618300 |
| C  | -0.19199700 | -3.32309800 | 0.17809500  |
| C  | 0.17073800  | -4.64725500 | 0.18657800  |
| H  | -0.39007600 | -5.56050400 | 0.07057100  |
| H  | 2.11336400  | -5.46093300 | 0.43062100  |
| H  | 2.95935100  | -3.05654600 | 0.63596500  |
| C  | -1.49899300 | 2.69423100  | -0.05141300 |
| C  | 0.16737800  | 4.64737400  | -0.18644600 |
| H  | -0.39416000 | 5.56029000  | -0.07132300 |
| H  | 2.95738600  | 3.05842000  | -0.63346200 |
| H  | 2.10955800  | 5.46231500  | -0.42976500 |
| C  | -0.19443800 | 3.32295900  | -0.17763300 |
| N  | 0.92088000  | 2.54716800  | -0.36163600 |
| N  | 0.92263200  | -2.54657700 | 0.36327700  |
| N  | -1.51061800 | -1.36917500 | -0.00311700 |
| C  | -3.88764200 | -2.81388100 | -0.00193000 |
| H  | -4.81711600 | -3.37582400 | -0.01121200 |
| N  | 0.44015600  | -0.53203200 | -2.87695800 |
| N  | 0.43903600  | 0.53350800  | 2.87701400  |
| N  | 3.77387000  | 0.00034600  | -0.00108900 |
| O  | -0.04038600 | -0.50046600 | 2.32426600  |
| O  | 0.30757400  | 0.75863700  | 4.04952900  |
| O  | 1.06148300  | 1.32541400  | 2.10132800  |
| O  | 1.05672100  | -1.32728200 | -2.09993100 |
| O  | -0.03396700 | 0.50498400  | -2.32546800 |
| O  | 0.30924300  | -0.75696100 | -4.04959500 |
| O  | 3.09549000  | 0.75744700  | -0.75988900 |
| O  | 3.09571300  | -0.75621400 | 0.75852400  |
| O  | 4.97467800  | -0.00024400 | -0.00178800 |
| C  | 1.93615200  | -3.36230700 | 0.47954700  |
| C  | 1.93390000  | 3.36352700  | -0.47763400 |
| N  | 1.52346400  | -4.64790700 | 0.37890300  |
| N  | 1.52023000  | 4.64888600  | -0.37788700 |
| Am | 0.80763300  | 0.00034400  | 0.00032600  |
| C  | -5.15441000 | -0.68020700 | -0.00422500 |
| H  | -6.08804400 | -1.23478800 | -0.00616600 |
| C  | -5.15493100 | 0.67626700  | 0.00309000  |

|                                                                                       |             |             |             |
|---------------------------------------------------------------------------------------|-------------|-------------|-------------|
| H                                                                                     | -6.08898800 | 1.23013400  | 0.00491700  |
| AmR <sub>2</sub> PhR <sub>3</sub> (NO <sub>3</sub> ) <sub>3</sub> (PBE0/6-311G*-RECP) |             |             |             |
| C                                                                                     | 2.61654500  | 0.91467200  | 0.01994200  |
| C                                                                                     | 1.28317800  | 2.79454200  | 0.07385300  |
| C                                                                                     | 2.41321500  | 3.63931200  | 0.06736100  |
| H                                                                                     | 2.28729700  | 4.71552000  | 0.10077700  |
| C                                                                                     | 2.71940800  | -0.52625800 | 0.02710400  |
| C                                                                                     | 4.00177600  | -1.12351800 | 0.02029000  |
| C                                                                                     | 4.05602700  | -2.52870100 | 0.00130900  |
| C                                                                                     | 2.89679500  | -3.25590800 | -0.04357400 |
| H                                                                                     | 5.02086400  | -3.02719700 | -0.00002700 |
| H                                                                                     | 2.93543800  | -4.33843500 | -0.09998000 |
| N                                                                                     | 1.58917900  | -1.25048800 | 0.02612900  |
| C                                                                                     | 3.80183700  | 1.68155500  | 0.02432100  |
| C                                                                                     | -0.06475800 | 3.32536600  | 0.18960100  |
| C                                                                                     | -0.52053100 | 4.62023400  | 0.22279500  |
| H                                                                                     | -0.02428500 | 5.57348100  | 0.13837600  |
| H                                                                                     | -2.51831000 | 5.28877500  | 0.46006300  |
| H                                                                                     | -3.19364800 | 2.82604400  | 0.60420800  |
| C                                                                                     | 1.66447800  | -2.57337200 | -0.04217900 |
| H                                                                                     | 0.86734000  | -5.30998400 | 0.02524900  |
| H                                                                                     | -2.73778400 | -3.30030100 | -0.70401900 |
| H                                                                                     | -1.57308500 | -5.80853500 | -0.38705100 |
| C                                                                                     | 0.39078300  | -3.25720500 | -0.18181500 |
| N                                                                                     | -0.74652200 | -2.62637000 | -0.40290000 |
| N                                                                                     | -1.12402300 | 2.46805700  | 0.34031400  |
| N                                                                                     | 1.39259200  | 1.47263900  | 0.01954500  |
| C                                                                                     | 3.66113400  | 3.08260500  | 0.03205500  |
| H                                                                                     | 4.54792600  | 3.70968100  | 0.02644200  |
| C                                                                                     | -2.19375800 | 3.20692300  | 0.46237900  |
| C                                                                                     | -1.71154200 | -3.57615100 | -0.51953000 |
| N                                                                                     | -1.87183100 | 4.52082800  | 0.39597200  |
| C                                                                                     | 5.07562100  | 1.04122200  | 0.02449900  |
| H                                                                                     | 5.96819200  | 1.65973800  | 0.02616900  |
| C                                                                                     | 5.17322100  | -0.31184000 | 0.02317400  |
| H                                                                                     | 6.14437700  | -0.79738600 | 0.02094000  |
| N                                                                                     | 0.18257000  | -4.59736400 | -0.15817900 |
| C                                                                                     | -1.15098700 | -4.81677500 | -0.36752200 |
| Am                                                                                    | -0.82710900 | -0.06762600 | -0.01623900 |
| N                                                                                     | -0.38680600 | -0.56414700 | 2.86807200  |
| O                                                                                     | -0.21353600 | -0.77884300 | 4.03727300  |
| O                                                                                     | -0.09909200 | 0.54539000  | 2.32964200  |
| O                                                                                     | -0.86161600 | -1.44339500 | 2.08171700  |

|   |             |             |             |
|---|-------------|-------------|-------------|
| N | -3.78227400 | -0.25598300 | -0.01050400 |
| O | -4.98051200 | -0.32041700 | -0.02461600 |
| O | -3.15399100 | 0.51409800  | 0.78160900  |
| O | -3.05466700 | -0.94798600 | -0.78468700 |
| N | -0.37314700 | 0.53771100  | -2.87209600 |
| O | -0.19590500 | 0.79325900  | -4.03196300 |
| O | -1.14069700 | 1.23095200  | -2.13450800 |
| O | 0.20229600  | -0.43322700 | -2.29413200 |

AmR<sub>2</sub>PhR<sub>4</sub>(NO<sub>3</sub>)<sub>3</sub> (PBE0/6-311G\*-RECP)

|   |             |             |             |
|---|-------------|-------------|-------------|
| C | -2.53761000 | 1.07417100  | 0.01173500  |
| C | -1.07876000 | 2.85880200  | -0.09050500 |
| C | -2.14726000 | 3.77942600  | -0.06586300 |
| H | -1.94907600 | 4.84417600  | -0.11275200 |
| C | -2.73979100 | -0.35689100 | 0.01649400  |
| C | -4.05980100 | -0.86146800 | 0.06061700  |
| C | -4.21609700 | -2.25915600 | 0.08452700  |
| C | -3.11167900 | -3.06707400 | 0.09131700  |
| H | -5.21455800 | -2.68530300 | 0.11461500  |
| H | -3.21346100 | -4.14534400 | 0.14013800  |
| N | -1.66231700 | -1.16261300 | -0.01259600 |
| C | -3.66659100 | 1.92238100  | 0.03106800  |
| C | 0.29973300  | 3.29595800  | -0.24306400 |
| C | 0.84094900  | 4.55636600  | -0.30527200 |
| H | 0.41182400  | 5.54198500  | -0.22526300 |
| H | 2.87381400  | 5.08735900  | -0.58922700 |
| H | 3.38163100  | 2.58209400  | -0.70812400 |
| C | -1.83447000 | -2.47534100 | 0.05049500  |
| C | -0.42901200 | -4.64610600 | 0.06071900  |
| H | -1.08803800 | -5.48877200 | -0.06748500 |
| H | 1.45943600  | -5.61721700 | 0.19781300  |
| C | -0.62627800 | -3.28640300 | 0.11872200  |
| N | 0.59441100  | -2.70918500 | 0.28460300  |
| N | 1.29762900  | 2.36896900  | -0.40215400 |
| N | -1.27948800 | 1.54847300  | -0.02157400 |
| C | -3.42916600 | 3.31020100  | 0.00606400  |
| H | -4.27016900 | 3.99716700  | 0.02775800  |
| C | 2.41205300  | 3.03200500  | -0.55569200 |
| N | 2.17925800  | 4.36487900  | -0.50305200 |
| N | 0.90473400  | -4.77676300 | 0.19256400  |
| C | -4.98117600 | 1.37269600  | 0.06999300  |
| H | -5.82841800 | 2.05178000  | 0.08701700  |
| C | -5.17183800 | 0.03000300  | 0.08465800  |
| H | -6.17363900 | -0.38755900 | 0.11609900  |

|    |             |             |             |
|----|-------------|-------------|-------------|
| N  | 1.51453000  | -3.60574400 | 0.32675700  |
| Am | 0.82586400  | -0.11376800 | -0.00936000 |
| N  | 0.29537800  | -0.59861600 | -2.88205300 |
| O  | 0.08561100  | -0.81689600 | -4.04449100 |
| O  | 0.04507500  | 0.51801500  | -2.34178800 |
| O  | 0.77556600  | -1.48321000 | -2.10433800 |
| N  | 3.73358900  | -0.40156200 | 0.24317700  |
| O  | 4.92522300  | -0.46870100 | 0.36670400  |
| O  | 3.19271400  | 0.21462700  | -0.73676500 |
| O  | 2.92918000  | -0.92086300 | 1.06727300  |
| N  | 0.36298400  | 0.45060400  | 2.85073700  |
| O  | 0.19834200  | 0.67923200  | 4.01796000  |
| O  | 0.98045300  | 1.25255400  | 2.08309500  |
| O  | -0.07849000 | -0.59962000 | 2.29456200  |

AmR<sub>2</sub>PhR<sub>5</sub>(NO<sub>3</sub>)<sub>3</sub> (PBE0/6-311G\*-RECP)

|   |             |             |             |
|---|-------------|-------------|-------------|
| C | 2.75502000  | 0.53768000  | -0.00191500 |
| C | 1.69935700  | 2.58887300  | -0.04462100 |
| C | 2.93550800  | 3.26695400  | -0.05579500 |
| H | 2.96124900  | 4.34989700  | -0.09575800 |
| C | 2.65842100  | -0.90402200 | -0.00944200 |
| C | 3.84690100  | -1.67103900 | -0.01092400 |
| C | 3.71350100  | -3.07098000 | 0.00357100  |
| C | 2.46717700  | -3.63607800 | 0.04626100  |
| H | 4.60368400  | -3.69299600 | -0.00448400 |
| H | 2.34131400  | -4.71207800 | 0.08249500  |
| N | 1.43884300  | -1.47011300 | -0.00353500 |
| C | 4.03552800  | 1.13354700  | -0.01933200 |
| C | 0.43931500  | 3.30784800  | -0.13898900 |
| C | 0.16999300  | 4.65376400  | -0.12198000 |
| H | 0.79647500  | 5.52384100  | -0.01092300 |
| H | -1.71642100 | 5.60524700  | -0.29886900 |
| H | -2.73760800 | 3.27204800  | -0.50135000 |
| C | 1.34069600  | -2.79379300 | 0.05220200  |
| C | -0.55278500 | -4.62277000 | 0.19536100  |
| H | -0.08109400 | -5.59051800 | 0.12400700  |
| H | -2.99374400 | -2.79670700 | 0.48927800  |
| C | -0.00873400 | -3.32987600 | 0.16191700  |
| N | -1.02409900 | -2.47940700 | 0.28813000  |
| N | -0.73333300 | 2.61462000  | -0.30044500 |
| N | 1.62100100  | 1.26435500  | 0.01146600  |
| C | 4.09278700  | 2.54011300  | -0.03171200 |
| H | 5.05897400  | 3.03607200  | -0.03970500 |
| C | -1.69049100 | 3.50151000  | -0.37637400 |

|    |             |             |             |
|----|-------------|-------------|-------------|
| N  | -1.18423600 | 4.75188800  | -0.27413000 |
| C  | 5.20937400  | 0.32461700  | -0.02843200 |
| H  | 6.17821900  | 0.81472900  | -0.03994700 |
| C  | 5.11918100  | -1.02823500 | -0.02363600 |
| H  | 6.01356900  | -1.64379900 | -0.02840500 |
| N  | -2.08358400 | -3.23239800 | 0.38300400  |
| N  | -1.87108600 | -4.52384500 | 0.33684500  |
| Am | -0.79175300 | 0.07911500  | 0.00172400  |
| N  | -0.48843700 | 0.46188600  | 2.90716400  |
| O  | -0.37361600 | 0.62879900  | 4.08908100  |
| O  | -1.01746800 | 1.33402000  | 2.14636900  |
| O  | -0.08308400 | -0.58937900 | 2.32414100  |
| N  | -0.54121900 | -0.42328600 | -2.88553100 |
| O  | -0.46105600 | -0.62778800 | -4.06414600 |
| O  | 0.10320200  | 0.50552800  | -2.30894100 |
| O  | -1.27288000 | -1.13046500 | -2.12178000 |
| N  | -3.77480900 | 0.12543000  | -0.04251700 |
| O  | -3.12379900 | -0.75439300 | 0.60950100  |
| O  | -4.97100100 | 0.12259900  | -0.10002900 |
| O  | -3.06352800 | 0.99930000  | -0.61922100 |

AmR<sub>2</sub>PhR<sub>6</sub>(NO<sub>3</sub>)<sub>3</sub> (PBE0/6-311G\*-RECP)

|   |             |             |             |
|---|-------------|-------------|-------------|
| C | 2.73941200  | -0.39904900 | -0.04829000 |
| C | 1.83473600  | -2.51022300 | -0.11623100 |
| C | 3.09935100  | -3.11216000 | 0.00254700  |
| H | 3.20854300  | -4.19123900 | 0.02590600  |
| C | 2.53958400  | 1.03028900  | -0.11445200 |
| C | 3.66560800  | 1.87862400  | -0.07501600 |
| C | 3.42943800  | 3.26183800  | -0.19690600 |
| C | 2.15296200  | 3.72140100  | -0.37408000 |
| H | 4.26644300  | 3.95316100  | -0.16428700 |
| H | 1.95776500  | 4.78129500  | -0.49181100 |
| N | 1.28657700  | 1.49443800  | -0.24709200 |
| C | 4.05453900  | -0.90783900 | 0.06988300  |
| C | 0.59970500  | -3.27624700 | -0.23222300 |
| H | 1.17432600  | -5.32566500 | -0.31429600 |
| H | -1.34063700 | -5.80456000 | -0.50965200 |
| C | 1.08671100  | 2.79797800  | -0.40051400 |
| C | -0.85189100 | 4.45450400  | -0.76273200 |
| H | -0.43809100 | 5.44986100  | -0.75453900 |
| H | -3.37472600 | 2.42732100  | -0.94750000 |
| H | -2.89738600 | 4.93420700  | -1.04923300 |
| C | -0.29125200 | 3.20975700  | -0.61644900 |
| N | -1.27677500 | 2.25856200  | -0.69901300 |

|    |             |             |             |
|----|-------------|-------------|-------------|
| N  | -0.59184700 | -2.72549200 | -0.28044600 |
| N  | 1.66709800  | -1.19802300 | -0.12973800 |
| C  | 4.20368300  | -2.30464100 | 0.10157800  |
| H  | 5.19528900  | -2.73585800 | 0.20057800  |
| C  | -2.40347600 | 2.89320300  | -0.87890100 |
| N  | -2.18971900 | 4.22921500  | -0.92945500 |
| C  | 5.16321600  | -0.01337900 | 0.14216200  |
| H  | 6.16157400  | -0.42685900 | 0.24715200  |
| C  | 4.97389200  | 1.32816900  | 0.07071000  |
| H  | 5.82056500  | 2.00668200  | 0.11638600  |
| N  | -1.52686800 | -3.69508700 | -0.39864900 |
| C  | -0.88732000 | -4.82925700 | -0.42144600 |
| N  | 0.45455100  | -4.62342000 | -0.31766700 |
| Am | -0.81912400 | -0.14776900 | 0.06550400  |
| N  | 0.07926700  | 0.73438900  | 2.74242800  |
| O  | -0.74968000 | 1.41241100  | 2.07083300  |
| O  | 0.52164800  | -0.31414500 | 2.17059500  |
| O  | 0.44407500  | 1.05885400  | 3.84039900  |
| N  | -3.35591500 | -0.44045000 | 1.45581100  |
| O  | -4.39324300 | -0.52546200 | 2.04922000  |
| O  | -2.36977600 | -1.20313600 | 1.68581900  |
| O  | -3.16531700 | 0.42783500  | 0.54470900  |
| N  | -1.19054600 | -0.43858500 | -2.83683100 |
| O  | -1.35301200 | -0.53803700 | -4.02373400 |
| O  | -2.15625300 | -0.44819500 | -2.01581500 |
| O  | -0.03606800 | -0.31223900 | -2.32139000 |

AmR<sub>2</sub>PhR<sub>7</sub>(NO<sub>3</sub>)<sub>3</sub> (PBE0/6-311G\*-RECP)

|   |             |             |             |
|---|-------------|-------------|-------------|
| C | -2.67657600 | 0.81842800  | 0.00163700  |
| C | -1.41603000 | 2.74866800  | -0.03469900 |
| C | -2.57645000 | 3.55025900  | -0.02724200 |
| H | -2.49067100 | 4.63053700  | -0.05466500 |
| C | -2.72711800 | -0.62439800 | -0.01373200 |
| C | -3.98482900 | -1.27075100 | -0.01850500 |
| C | -3.99209500 | -2.67860300 | -0.01467700 |
| C | -2.80879200 | -3.36571600 | 0.02614400  |
| H | -4.94021900 | -3.20812100 | -0.02773000 |
| H | -2.76812700 | -4.44789100 | 0.05578300  |
| N | -1.56938700 | -1.30875300 | -0.00818200 |
| C | -3.88966900 | 1.54129000  | -0.00212600 |
| C | -0.08971200 | 3.33393000  | -0.13887600 |
| C | 0.31540500  | 4.64576000  | -0.14151500 |
| H | -0.21798600 | 5.57670200  | -0.03743100 |



|    |             |             |             |
|----|-------------|-------------|-------------|
| H  | 2.28665200  | 5.39671700  | -0.35315200 |
| H  | 3.05932400  | 2.96647200  | -0.54263900 |
| C  | -1.61016800 | -2.63163100 | 0.04159100  |
| H  | 2.81061900  | -3.30399800 | 0.57145500  |
| H  | 1.61566000  | -5.61294200 | 0.39320700  |
| C  | -0.31895000 | -3.29809200 | 0.16803000  |
| N  | 0.82209200  | -2.58245500 | 0.32559700  |
| N  | 1.00304400  | 2.52216800  | -0.30274500 |
| N  | -1.47370700 | 1.42277300  | 0.00955200  |
| C  | -3.80253200 | 2.94639500  | -0.00085600 |
| H  | -4.71263800 | 3.53911000  | 0.00429200  |
| C  | 2.04420000  | 3.30505500  | -0.40227700 |
| C  | 1.75724800  | -3.49632100 | 0.43472600  |
| N  | 1.67041100  | 4.60285700  | -0.30976700 |
| N  | 1.18326300  | -4.70538700 | 0.35011900  |
| C  | -5.13839900 | 0.85383300  | -0.01194300 |
| H  | -6.05330400 | 1.43883600  | -0.01323600 |
| C  | -5.18537600 | -0.50171600 | -0.02082700 |
| H  | -6.13765500 | -1.02318300 | -0.02742400 |
| N  | -0.14137500 | -4.60396600 | 0.18055900  |
| Am | 0.81449000  | -0.02012300 | 0.00122900  |
| N  | 0.51200800  | 0.43795300  | 2.89965000  |
| O  | 0.40872300  | 0.62746400  | 4.08016600  |
| O  | -0.02279700 | -0.55512600 | 2.31980800  |
| O  | 1.15821000  | 1.22667800  | 2.13986900  |
| N  | 3.78188700  | -0.16402700 | -0.03650100 |
| O  | 4.98005600  | -0.22451900 | -0.05727200 |
| O  | 3.07477600  | -0.93898600 | 0.67773600  |
| O  | 3.13239100  | 0.67868500  | -0.72892200 |
| N  | 0.46212500  | -0.49219600 | -2.89176300 |
| O  | 1.00469000  | -1.33960700 | -2.11191100 |
| O  | 0.04485600  | 0.56589800  | -2.33371700 |
| O  | 0.34639300  | -0.69069500 | -4.06950000 |

AmR<sub>2</sub>PhR<sub>8</sub>(NO<sub>3</sub>)<sub>3</sub> (PBE0/6-311G\*-RECP)

|   |             |             |             |
|---|-------------|-------------|-------------|
| C | -2.60670500 | 0.94771500  | -0.01548800 |
| C | -1.25049800 | 2.81063900  | -0.06543600 |
| C | -2.37033600 | 3.66910500  | -0.05989200 |
| H | -2.23131200 | 4.74369300  | -0.09171800 |
| C | -2.72994400 | -0.49185200 | -0.02318600 |
| C | -4.02005300 | -1.07477700 | -0.01575700 |
| C | -4.09397300 | -2.47822100 | 0.00434000  |
| C | -2.94334200 | -3.22162900 | 0.04874300  |

|    |             |             |             |
|----|-------------|-------------|-------------|
| H  | -5.06528700 | -2.96356100 | 0.00615000  |
| H  | -2.99135700 | -4.30376000 | 0.10321000  |
| N  | -1.61042600 | -1.23172000 | -0.02162200 |
| C  | -3.78227400 | 1.72867100  | -0.02029400 |
| C  | 0.10372500  | 3.32587800  | -0.17525800 |
| C  | 0.57422700  | 4.61569500  | -0.20641500 |
| H  | 0.08833300  | 5.57452700  | -0.12519700 |
| H  | 2.58006900  | 5.26202100  | -0.43441500 |
| H  | 3.22928500  | 2.79235500  | -0.57503000 |
| C  | -1.70777800 | -2.55127700 | 0.04423500  |
| H  | -0.84840000 | -5.33247800 | 0.00624700  |
| H  | 2.66113100  | -3.46476900 | 0.68043500  |
| C  | -0.43594100 | -3.24891400 | 0.18320800  |
| N  | 0.71341200  | -2.63451900 | 0.39943900  |
| N  | 1.15447000  | 2.45695800  | -0.32046600 |
| N  | -1.37589500 | 1.48968900  | -0.01328000 |
| C  | -3.62508500 | 3.12797400  | -0.02706200 |
| H  | -4.50404000 | 3.76588000  | -0.02207700 |
| C  | 2.23296700  | 3.18405400  | -0.43751700 |
| C  | 1.61133900  | -3.63879500 | 0.50344000  |
| N  | 1.92483200  | 4.50118300  | -0.37280100 |
| C  | -5.06405400 | 1.10364700  | -0.02125600 |
| H  | -5.94845100 | 1.73380700  | -0.02351000 |
| C  | -5.18110700 | -0.24762100 | -0.01933100 |
| H  | -6.15871800 | -0.71964600 | -0.01722600 |
| N  | 1.08806300  | -4.84000300 | 0.36986100  |
| N  | -0.21009300 | -4.57268600 | 0.16979700  |
| Am | 0.83694300  | -0.07289700 | 0.01386200  |
| N  | 3.78064000  | -0.32899200 | -0.02575500 |
| O  | 3.04285900  | -1.03513200 | 0.72647600  |
| O  | 3.16125900  | 0.48375100  | -0.78330500 |
| O  | 4.97618400  | -0.41720800 | -0.02315000 |
| N  | 0.40715000  | 0.50679400  | 2.87423900  |
| O  | 0.23550000  | 0.75262300  | 4.03617600  |
| O  | -0.20441300 | -0.43349800 | 2.28037200  |
| O  | 1.20351900  | 1.17880100  | 2.14782600  |
| N  | 0.35008100  | -0.55807000 | -2.86335200 |
| O  | 0.15471700  | -0.77075200 | -4.02854700 |
| O  | 0.79826400  | -1.45318300 | -2.07738200 |
| O  | 0.11417100  | 0.56396500  | -2.32578900 |

AmR<sub>3</sub>PhR<sub>3</sub>(NO<sub>3</sub>)<sub>3</sub> (PBE0/6-311G\*-RECP)

|   |            |             |            |
|---|------------|-------------|------------|
| C | 2.67106700 | -0.72052300 | 0.00642600 |
|---|------------|-------------|------------|

|   |             |             |             |
|---|-------------|-------------|-------------|
| C | 1.47273400  | -2.68970300 | -0.02428600 |
| C | 2.65824400  | -3.45286900 | -0.01694000 |
| H | 2.62303800  | -4.53646500 | -0.04522000 |
| C | 2.66957700  | 0.72593900  | -0.00730200 |
| C | 3.90615000  | 1.41059400  | -0.00944800 |
| C | 3.85968200  | 2.81656000  | -0.00967200 |
| C | 2.65118500  | 3.45826200  | 0.01605900  |
| H | 4.78593700  | 3.38344300  | -0.01514900 |
| H | 2.61379300  | 4.54178200  | 0.04438600  |
| N | 1.48871200  | 1.36461400  | -0.01199500 |
| C | 3.90904700  | -1.40264000 | 0.00784200  |
| C | 0.15842200  | -3.29824100 | -0.12199300 |
| H | 0.53081700  | -5.38293300 | 0.01876300  |
| H | -1.94490300 | -5.73882100 | -0.29617400 |
| H | -2.98229400 | -3.16400000 | -0.53087700 |
| C | 1.46723500  | 2.69267900  | 0.02401900  |
| H | 0.51999700  | 5.38402800  | -0.01865400 |
| H | -2.98862500 | 3.15818600  | 0.53169300  |
| H | -1.95632900 | 5.73505400  | 0.29692700  |
| C | 0.15175500  | 3.29859200  | 0.12222900  |
| N | -0.95601100 | 2.60381400  | 0.28557900  |
| N | -0.95073000 | -2.60562200 | -0.28507400 |
| N | 1.49152800  | -1.36160600 | 0.01178600  |
| C | 3.86544600  | -2.80870200 | 0.00813000  |
| H | 4.79285200  | -3.37370600 | 0.01311000  |
| N | -0.40683000 | -0.39616800 | 2.88182000  |
| N | -0.40899300 | 0.39445700  | -2.88117300 |
| N | -3.79387600 | -0.00337500 | -0.00120500 |
| O | -0.18680900 | -0.71706600 | -2.31722100 |
| O | -0.24519600 | 0.56975100  | -4.05662900 |
| O | -0.81057200 | 1.32060300  | -2.10582300 |
| O | -0.80598900 | -1.32313800 | 2.10616200  |
| O | -0.18871800 | 0.71646100  | 2.31844500  |
| O | -0.24150000 | -0.57172900 | 4.05702200  |
| O | -3.11587400 | 0.72684600  | 0.78609800  |
| O | -3.11384500 | -0.73268000 | -0.78747500 |
| O | -4.99422800 | -0.00412800 | -0.00202700 |
| C | -1.96729900 | -3.49803900 | -0.38196600 |
| C | -1.97430900 | 3.49424200  | 0.38267500  |
| C | -1.46954500 | -4.77136800 | -0.27339300 |
| C | -1.47907300 | 4.76853800  | 0.27398600  |
| N | -0.12018000 | -4.62844600 | -0.11213800 |
| N | -0.12947500 | 4.62825800  | 0.11242400  |
| C | 5.13381300  | -0.67307600 | 0.00331700  |

|    |             |             |             |
|----|-------------|-------------|-------------|
| C  | 5.13241600  | 0.68355500  | -0.00565600 |
| H  | 6.06874200  | -1.22520300 | 0.00581400  |
| H  | 6.06620400  | 1.23760700  | -0.00873100 |
| Am | -0.83058600 | -0.00076400 | 0.00054100  |

AmR<sub>3</sub>PhR<sub>4</sub>(NO<sub>3</sub>)<sub>3</sub> (PBE0/6-311G\*-RECP)

|    |             |             |             |
|----|-------------|-------------|-------------|
| C  | -2.58898100 | 0.90260600  | -0.03150900 |
| C  | -1.24698300 | 2.77279600  | 0.07647600  |
| C  | -2.36733600 | 3.62693300  | 0.06567700  |
| H  | -2.24982100 | 4.70336200  | 0.12864700  |
| C  | -2.69705200 | -0.53917400 | -0.04118800 |
| C  | -3.98097300 | -1.12658500 | -0.08945000 |
| C  | -4.04488700 | -2.53159200 | -0.11915900 |
| C  | -2.88916500 | -3.26473400 | -0.12500000 |
| H  | -5.01252200 | -3.02346100 | -0.15278000 |
| H  | -2.92046100 | -4.34726400 | -0.17530500 |
| N  | -1.56902000 | -1.27013700 | -0.01108800 |
| C  | -3.77026500 | 1.67925000  | -0.04434100 |
| C  | 0.11227800  | 3.26207600  | 0.23162700  |
| H  | -0.06355900 | 5.36947800  | 0.10772900  |
| H  | 2.42208300  | 5.49680500  | 0.52186500  |
| H  | 3.21493800  | 2.83678000  | 0.74742800  |
| C  | -1.65290900 | -2.59137000 | -0.07739300 |
| H  | -0.71020600 | -5.55113100 | -0.00574900 |
| H  | 1.84421100  | -5.50571500 | -0.22191600 |
| C  | -0.39245400 | -3.31913100 | -0.13707000 |
| N  | 0.79059000  | -2.65950100 | -0.26712700 |
| N  | 1.14878600  | 2.46849600  | 0.42420800  |
| N  | -1.36696300 | 1.45368300  | -0.00097100 |
| C  | -3.61941700 | 3.07706400  | -0.00770600 |
| H  | -4.50087400 | 3.71124800  | -0.01945000 |
| C  | 2.23962000  | 3.26394000  | 0.57244400  |
| C  | 1.86247700  | 4.57701100  | 0.46759400  |
| N  | 0.51175200  | 4.55850400  | 0.25551700  |
| C  | -5.04676800 | 1.04558300  | -0.08666700 |
| C  | -5.14817300 | -0.30671600 | -0.10988400 |
| H  | -5.93694000 | 1.66725900  | -0.09917200 |
| H  | -6.12098800 | -0.78769800 | -0.14435800 |
| N  | 1.76813500  | -3.49231900 | -0.30910700 |
| C  | -0.10639300 | -4.66400600 | -0.10217900 |
| N  | 1.23499200  | -4.70389900 | -0.21025800 |
| Am | 0.85375300  | -0.05330800 | 0.02664700  |
| N  | 0.34444900  | 0.46071500  | -2.83951600 |
| O  | 0.15259900  | 0.67397500  | -4.00583700 |

|   |             |             |             |
|---|-------------|-------------|-------------|
| O | 0.86055600  | 1.32800600  | -2.06802700 |
| O | 0.03274500  | -0.63732200 | -2.28884300 |
| N | 3.76132900  | -0.17356300 | -0.20303500 |
| O | 3.17490200  | 0.37602000  | 0.78928800  |
| O | 2.99372300  | -0.69223900 | -1.06541900 |
| O | 4.95560700  | -0.18718200 | -0.30575700 |
| N | 0.22666900  | -0.58760600 | 2.87260300  |
| O | -0.02978400 | -0.82782800 | 4.02120000  |
| O | -0.10267900 | 0.50012900  | 2.31426700  |
| O | 0.83693800  | -1.41727100 | 2.12780400  |

AmR<sub>3</sub>PhR<sub>5</sub>(NO<sub>3</sub>)<sub>3</sub> (PBE0/6-311G\*-RECP)

|   |             |             |             |
|---|-------------|-------------|-------------|
| C | -2.78655300 | 0.34681400  | -0.05892000 |
| C | -1.85739000 | 2.45345400  | -0.10524000 |
| C | -3.12857300 | 3.05929400  | -0.13360200 |
| H | -3.23305900 | 4.13752100  | -0.18638000 |
| C | -2.59970700 | -1.08654800 | -0.05959800 |
| C | -3.73840600 | -1.92435700 | -0.06638400 |
| C | -3.51770700 | -3.31334800 | -0.05582400 |
| C | -2.23744200 | -3.79758300 | -0.02180100 |
| H | -4.36631600 | -3.99091100 | -0.06486100 |
| H | -2.04333700 | -4.86370600 | 0.00408000  |
| N | -1.34732600 | -1.57043900 | -0.05000000 |
| C | -4.10221600 | 0.86507300  | -0.08605600 |
| C | -0.62871900 | 3.22280700  | -0.19175700 |
| H | -1.26772800 | 5.23618600  | -0.04879000 |
| H | 1.14899600  | 5.91287300  | -0.31361300 |
| H | 2.51784500  | 3.50156300  | -0.50797500 |
| C | -1.16628600 | -2.88545600 | -0.01181700 |
| H | 0.42779600  | -5.58752500 | 0.05690300  |
| H | 3.16208700  | -2.61341100 | 0.39025800  |
| C | 0.21561000  | -3.33535400 | 0.07485000  |
| N | 1.17770000  | -2.42166100 | 0.17946800  |
| N | 0.56524700  | 2.67727100  | -0.33322200 |
| N | -1.70104200 | 1.13676200  | -0.04206500 |
| C | -4.24239500 | 2.26364200  | -0.11106000 |
| H | -5.23552300 | 2.70237100  | -0.12965600 |
| C | 1.46274700  | 3.69746600  | -0.40281900 |
| C | 0.80171300  | 4.89239800  | -0.30519800 |
| N | -0.52156000 | 4.57445400  | -0.17456100 |
| C | -5.22383600 | -0.01515900 | -0.09345800 |
| C | -5.04820600 | -1.35954100 | -0.08272900 |
| H | -6.22152400 | 0.41286200  | -0.10932300 |
| H | -5.90294500 | -2.02907900 | -0.08740400 |

|    |             |             |             |
|----|-------------|-------------|-------------|
| N  | 2.15009800  | -4.40905300 | 0.23891900  |
| N  | 2.28286000  | -3.10692000 | 0.26917800  |
| C  | 0.83916000  | -4.59158900 | 0.11250500  |
| Am | 0.81669900  | 0.14200800  | 0.02463200  |
| N  | 0.20201000  | 0.41810100  | 2.89745400  |
| O  | -0.07261800 | 0.54603200  | 4.05784800  |
| O  | 0.16567600  | -0.70416700 | 2.30767000  |
| O  | 0.54074900  | 1.40423900  | 2.16721700  |
| N  | 3.77763800  | 0.37435500  | 0.21189000  |
| O  | 3.16026900  | -0.61713400 | 0.72227200  |
| O  | 3.02921700  | 1.27723200  | -0.26280900 |
| O  | 4.97218900  | 0.44214600  | 0.18914600  |
| N  | 0.79907400  | -0.32023700 | -2.86735500 |
| O  | 0.79493300  | -0.49968100 | -4.05193400 |
| O  | 1.71809400  | -0.76592000 | -2.11266600 |
| O  | -0.12304600 | 0.32599800  | -2.27396500 |

AmR<sub>3</sub>PhR<sub>6</sub>(NO<sub>3</sub>)<sub>3</sub> (PBE0/6-311G\*-RECP)

|   |             |             |             |
|---|-------------|-------------|-------------|
| C | -2.51448200 | -1.06194500 | -0.00010200 |
| C | -1.05353600 | -2.83859200 | -0.11335300 |
| C | -2.11828800 | -3.76221700 | -0.11281100 |
| H | -1.93267000 | -4.82877800 | -0.17960600 |
| C | -2.71492200 | 0.37033200  | 0.01756200  |
| C | -4.03285100 | 0.88020000  | 0.07478500  |
| C | -4.17930500 | 2.27713000  | 0.12243700  |
| C | -3.06742900 | 3.07986000  | 0.13458300  |
| H | -5.17363400 | 2.71095500  | 0.16824900  |
| H | -3.17294500 | 4.15677100  | 0.21056900  |
| N | -1.63680500 | 1.16587500  | -0.01320500 |
| C | -3.64422900 | -1.90987000 | 0.00487800  |
| C | 0.33529500  | -3.23786100 | -0.26163600 |
| H | 0.28990400  | -5.35511100 | -0.18741200 |
| H | 2.78190100  | -5.31851500 | -0.57455200 |
| H | 3.40990300  | -2.61042300 | -0.73683200 |
| C | -1.79804000 | 2.47801500  | 0.06967100  |
| H | -1.11665100 | 5.28506200  | -0.10657600 |
| H | 1.38709600  | 5.77934700  | 0.16881100  |
| C | -0.56091000 | 3.24363100  | 0.14289000  |
| N | 0.62067300  | 2.70110300  | 0.32225700  |
| N | 1.32267200  | -2.37768300 | -0.42519300 |
| N | -1.25954700 | -1.53025100 | -0.02892000 |
| C | -3.40383700 | -3.29519600 | -0.04032400 |
| H | -4.24194800 | -3.98567100 | -0.03445600 |
| C | 2.46133000  | -3.10014600 | -0.57933300 |

|    |             |             |             |
|----|-------------|-------------|-------------|
| C  | 2.16558500  | -4.43666600 | -0.50630300 |
| C  | 0.92747000  | 4.80345000  | 0.19475400  |
| N  | 0.81502100  | -4.50655200 | -0.30823100 |
| C  | -4.95791100 | -1.35496800 | 0.05138800  |
| C  | -5.14625100 | -0.01207600 | 0.08788900  |
| H  | -5.80773800 | -2.03086700 | 0.05826600  |
| H  | -6.14790900 | 0.40480000  | 0.12792200  |
| N  | 1.55660900  | 3.67264100  | 0.35228600  |
| N  | -0.40929300 | 4.59105000  | 0.06416900  |
| Am | 0.87079700  | 0.12277800  | -0.00530100 |
| N  | 0.25573000  | -0.52102500 | 2.81997100  |
| O  | 0.00695000  | -0.79016500 | 3.96417500  |
| O  | 0.92767200  | -1.29494200 | 2.07193100  |
| O  | -0.14991000 | 0.54708500  | 2.27035200  |
| N  | 3.75692600  | 0.41101500  | 0.24314900  |
| O  | 2.95585900  | 0.83793800  | 1.12442800  |
| O  | 3.20803200  | -0.12743400 | -0.77819800 |
| O  | 4.94731200  | 0.49295500  | 0.35271000  |
| N  | 0.20302700  | 0.61140400  | -2.85760000 |
| O  | -0.08821800 | 0.83308900  | -4.00232100 |
| O  | 0.03093400  | -0.52095100 | -2.31861400 |
| O  | 0.69108700  | 1.50580500  | -2.09864500 |

AmR<sub>3</sub>PhR<sub>7</sub>(NO<sub>3</sub>)<sub>3</sub> (PBE0/6-311G\*-RECP)

|   |             |             |             |
|---|-------------|-------------|-------------|
| C | 2.70243100  | 0.63699000  | 0.02342100  |
| C | 1.56711600  | 2.63986900  | -0.02650100 |
| C | 2.77192500  | 3.36994800  | -0.03376800 |
| H | 2.76772600  | 4.45339300  | -0.08442100 |
| C | 2.65760900  | -0.80661700 | 0.01182300  |
| C | 3.86947200  | -1.53274400 | 0.01090600  |
| C | 3.78337700  | -2.93802600 | 0.01908200  |
| C | 2.55630100  | -3.54434200 | 0.05803700  |
| H | 4.69382000  | -3.52996100 | 0.00945200  |
| H | 2.44406000  | -4.62141700 | 0.08971300  |
| N | 1.45694500  | -1.41000900 | 0.01501400  |
| C | 3.96006000  | 1.28268300  | 0.01186500  |
| C | 0.26650200  | 3.27466300  | -0.14862600 |
| H | 0.66681800  | 5.34336200  | 0.06143100  |
| H | -1.79531100 | 5.75037000  | -0.31874800 |
| H | -2.86791200 | 3.20170300  | -0.63518500 |
| C | 1.40831700  | -2.73252900 | 0.06654900  |
| H | -3.05196900 | -3.09866300 | 0.56006300  |
| H | -2.01113400 | -5.48504400 | 0.44869800  |

|    |             |             |             |
|----|-------------|-------------|-------------|
| C  | 0.07379900  | -3.30902000 | 0.18577000  |
| N  | -1.01896300 | -2.51589600 | 0.31034100  |
| N  | -0.84907400 | 2.60224000  | -0.35975500 |
| N  | 1.54384300  | 1.31437900  | 0.03391300  |
| C  | 3.95960800  | 2.68892100  | -0.00120800 |
| H  | 4.90380900  | 3.22537400  | -0.00676700 |
| C  | -1.85080400 | 3.51518900  | -0.46057000 |
| C  | -2.01291700 | -3.36305400 | 0.43387600  |
| C  | -1.33564600 | 4.77532300  | -0.30876800 |
| N  | 0.00738800  | 4.60565300  | -0.11574500 |
| C  | 5.16122600  | 0.51412500  | 0.00596400  |
| C  | 5.11758600  | -0.84163500 | 0.00568500  |
| H  | 6.11321000  | 1.03633300  | -0.00034000 |
| H  | 6.03405600  | -1.42386800 | 0.00199600  |
| N  | -0.18964200 | -4.59973700 | 0.22895900  |
| N  | -1.51937000 | -4.60939300 | 0.38552800  |
| Am | -0.84104900 | 0.04321600  | -0.01639300 |
| N  | -0.37023700 | -0.51280300 | -2.87600900 |
| O  | -0.19438800 | -0.74441200 | -4.04001400 |
| O  | -1.09969600 | -1.24943000 | -2.13981700 |
| O  | 0.16743800  | 0.47446500  | -2.28886600 |
| N  | -3.79765600 | 0.07374100  | -0.04243800 |
| O  | -3.09620800 | 0.84934700  | -0.76099700 |
| O  | -3.13916000 | -0.70573200 | 0.71561300  |
| O  | -4.99631700 | 0.07348000  | -0.07622300 |
| N  | -0.44550800 | 0.48897500  | 2.87876400  |
| O  | -0.29029500 | 0.68322200  | 4.05315300  |
| O  | -0.12067500 | -0.60073200 | 2.31954100  |
| O  | -0.93787600 | 1.37033800  | 2.10514000  |

AmR<sub>3</sub>PhR<sub>8</sub>(NO<sub>3</sub>)<sub>3</sub> (PBE0/6-311G\*-RECP)

|   |             |             |             |
|---|-------------|-------------|-------------|
| C | -2.64773500 | 0.75895800  | 0.01005900  |
| C | -1.41918200 | 2.70537500  | 0.06270600  |
| C | -2.58975700 | 3.49017900  | 0.07012500  |
| H | -2.53565200 | 4.57246000  | 0.11556100  |
| C | -2.67101400 | -0.68663100 | 0.01902400  |
| C | -3.91701400 | -1.35563600 | 0.01246300  |
| C | -3.89257400 | -2.76116800 | -0.00694700 |
| C | -2.69203800 | -3.42156500 | -0.05118200 |
| H | -4.82696800 | -3.31419600 | -0.00756700 |
| H | -2.66412000 | -4.50448300 | -0.10339600 |
| N | -1.50248200 | -1.34375600 | 0.01893300  |
| C | -3.87377100 | 1.46085500  | 0.02226900  |
| C | -0.08987600 | 3.27686100  | 0.18090700  |



|    |             |             |             |
|----|-------------|-------------|-------------|
| H  | -0.39641900 | 5.37078700  | 0.06536500  |
| H  | 2.08655500  | 5.64713000  | 0.41363500  |
| H  | 3.04298500  | 3.04088900  | 0.62245900  |
| C  | -1.50565400 | -2.66688600 | -0.04662300 |
| H  | -0.45090500 | -5.38231100 | -0.04300200 |
| H  | 2.91802800  | -3.26014800 | -0.67977800 |
| C  | -0.18686800 | -3.27134300 | -0.18533100 |
| N  | 0.91674600  | -2.57421300 | -0.38833400 |
| N  | 0.99664700  | 2.54704300  | 0.34810900  |
| N  | -1.45932200 | 1.37980200  | 0.00099300  |
| C  | -3.80801300 | 2.86585100  | 0.03685800  |
| H  | -4.72594000 | 3.44598500  | 0.04039500  |
| C  | 2.04012700  | 3.40734900  | 0.46892500  |
| C  | 1.88333200  | -3.51033200 | -0.50495900 |
| C  | 1.58190300  | 4.69539600  | 0.37249400  |
| N  | 0.23070300  | 4.59554400  | 0.19287800  |
| N  | 0.13232600  | -4.57618200 | -0.18994900 |
| C  | -5.10970600 | 0.74852000  | 0.02395200  |
| C  | -5.13192200 | -0.60771500 | 0.01845800  |
| H  | -6.03602600 | 1.31502400  | 0.03012700  |
| H  | -6.07508700 | -1.14532900 | 0.01682000  |
| N  | 1.44619000  | -4.74768200 | -0.38994600 |
| Am | 0.86385400  | -0.00766500 | -0.00880300 |
| N  | 0.32867700  | -0.55078500 | 2.85011900  |
| O  | 0.10991900  | -0.78792600 | 4.00627200  |
| O  | 0.90132200  | -1.38808300 | 2.08274800  |
| O  | -0.00679200 | 0.54156500  | 2.30305500  |
| N  | 3.80417200  | -0.08043300 | 0.01619100  |
| O  | 3.13375100  | 0.65968600  | 0.80292300  |
| O  | 3.11186700  | -0.78880000 | -0.78027400 |
| O  | 5.00177900  | -0.10741600 | 0.02462800  |
| N  | 0.30180200  | 0.54076800  | -2.85934100 |
| O  | 0.06716900  | 0.78061500  | -4.01187800 |
| O  | -0.13534000 | -0.49842500 | -2.27814500 |
| O  | 0.99229400  | 1.31918700  | -2.13071900 |

AmR<sub>4</sub>PhR<sub>4</sub>(NO<sub>3</sub>)<sub>3</sub> (PBE0/6-311G\*-RECP)

|   |             |             |             |
|---|-------------|-------------|-------------|
| C | -2.63882900 | -0.72237900 | -0.00008500 |
| C | -1.43916900 | -2.69193900 | -0.00024700 |
| C | -2.62280100 | -3.45584000 | -0.00024900 |
| H | -2.57469800 | -4.53882200 | -0.00029500 |
| C | -2.63831900 | 0.72415500  | -0.00000800 |
| C | -3.87389300 | 1.40885500  | -0.00000400 |

|    |             |             |             |
|----|-------------|-------------|-------------|
| C  | -3.82888400 | 2.81493900  | 0.00000700  |
| C  | -2.62036800 | 3.45760200  | -0.00000600 |
| H  | -4.75592400 | 3.38058500  | 0.00001900  |
| H  | -2.57150300 | 4.54055100  | -0.00000300 |
| N  | -1.45770500 | 1.36731100  | 0.00003100  |
| C  | -3.87488700 | -1.40620800 | -0.00010300 |
| C  | -0.12988800 | -3.33382000 | -0.00031800 |
| H  | -0.32279900 | -5.58472000 | -0.00073000 |
| H  | 2.23187500  | -5.38947500 | -0.00062000 |
| C  | -1.43727500 | 2.69287100  | 0.00000200  |
| H  | -0.31889600 | 5.58487700  | -0.00061400 |
| H  | 2.23564400  | 5.38785000  | -0.00044600 |
| C  | -0.12754800 | 3.33384300  | -0.00004300 |
| N  | 1.02223700  | 2.60557000  | 0.00016000  |
| N  | 1.02040400  | -2.60634900 | -0.00015100 |
| N  | -1.45867000 | -1.36636800 | -0.00016700 |
| C  | -3.83086400 | -2.81232500 | -0.00018000 |
| H  | -4.75830000 | -3.37732100 | -0.00018000 |
| N  | 0.28888000  | -0.00012500 | -2.89087200 |
| N  | 0.28846500  | -0.00014200 | 2.89100300  |
| N  | 3.73252700  | -0.00108500 | 0.00018600  |
| O  | 0.39909100  | -1.07075100 | 2.22023600  |
| O  | 0.08331500  | -0.00006700 | 4.07389500  |
| O  | 0.40011900  | 1.07042400  | 2.22028900  |
| O  | 0.39981400  | -1.07075200 | -2.22015200 |
| O  | 0.40000100  | 1.07042000  | -2.22009100 |
| O  | 0.08392500  | -0.00008000 | -4.07380300 |
| O  | 3.05217200  | 0.00212800  | -1.07380600 |
| O  | 3.05215000  | -0.00391300 | 1.07416900  |
| O  | 4.93150400  | -0.00141900 | 0.00019900  |
| Am | 0.82564300  | -0.00028300 | 0.00015200  |
| N  | 2.04495700  | -3.38052200 | -0.00026500 |
| N  | 2.04732600  | 3.37902900  | 0.00002400  |
| N  | 1.57801300  | -4.62348700 | -0.00051500 |
| N  | 1.58124800  | 4.62231800  | -0.00027400 |
| C  | 0.23273900  | -4.66157900 | -0.00054700 |
| C  | 0.23600100  | 4.66135000  | -0.00033800 |
| C  | -5.10017600 | -0.67640600 | -0.00005400 |
| H  | -6.03486200 | -1.22898600 | -0.00006100 |
| C  | -5.09969700 | 0.67991900  | -0.00001600 |
| H  | -6.03399200 | 1.23316100  | 0.00000500  |

AmR<sub>4</sub>PhR<sub>5</sub>(NO<sub>3</sub>)<sub>3</sub> (PBE0/6-311G\*-RECP)

|   |             |            |             |
|---|-------------|------------|-------------|
| C | -2.44572700 | 1.34085400 | -0.03277100 |
|---|-------------|------------|-------------|

|    |             |             |             |
|----|-------------|-------------|-------------|
| C  | -0.81993300 | 2.97524200  | 0.03545200  |
| C  | -1.78588100 | 3.99766400  | -0.01363800 |
| H  | -1.47616700 | 5.03620700  | 0.00252500  |
| C  | -2.79311700 | -0.06355100 | -0.02309500 |
| C  | -4.15841700 | -0.42708100 | -0.06618800 |
| C  | -4.46135700 | -1.80046700 | -0.06782300 |
| C  | -3.44874000 | -2.71952400 | -0.04640500 |
| H  | -5.49882400 | -2.11992100 | -0.09875000 |
| H  | -3.66464600 | -3.78148900 | -0.07011100 |
| N  | -1.80457100 | -0.97790500 | 0.02358000  |
| C  | -3.48303200 | 2.30075200  | -0.07629100 |
| C  | 0.59684300  | 3.28519300  | 0.15914200  |
| H  | 1.02563800  | 5.50793500  | 0.19974100  |
| C  | -2.11536500 | -2.26784300 | -0.00661500 |
| H  | -1.75195200 | -5.34432400 | 0.13995000  |
| H  | 0.76571700  | -5.79311100 | -0.01864800 |
| C  | -1.01001900 | -3.21657900 | -0.02726500 |
| N  | 0.27910000  | -2.79933700 | -0.14216600 |
| N  | 1.46436800  | 2.28349100  | 0.26112000  |
| N  | -1.14657800 | 1.68631300  | 0.00529700  |
| C  | -3.10969200 | 3.65689900  | -0.07586300 |
| H  | -3.87801700 | 4.42331200  | -0.11565200 |
| N  | 1.07963300  | -3.80442500 | -0.14480800 |
| N  | 0.32195800  | -4.88909400 | -0.03493300 |
| C  | 1.33752700  | 4.47564700  | 0.23894900  |
| C  | -0.98809500 | -4.59093800 | 0.04083400  |
| C  | -4.84720200 | 1.88902100  | -0.11653200 |
| H  | -5.61961600 | 2.65127200  | -0.15097400 |
| C  | -5.17335100 | 0.57332500  | -0.11144500 |
| H  | -6.21215200 | 0.25924500  | -0.14317200 |
| N  | 2.62614700  | 2.85446500  | 0.38960900  |
| H  | 3.45069400  | 2.27231300  | 0.49963500  |
| N  | 2.62170600  | 4.16589900  | 0.38612800  |
| Am | 0.78357400  | -0.21969900 | 0.02323300  |
| N  | 0.50440700  | 0.14448000  | -2.86432400 |
| O  | 0.43051500  | 0.28670500  | -4.05050500 |
| O  | 1.05656700  | 1.00678600  | -2.10672900 |
| O  | 0.03176100  | -0.86799900 | -2.26398900 |
| N  | 3.71142500  | -0.63122000 | -0.28855900 |
| O  | 2.85346100  | -1.31649500 | -0.90735600 |
| O  | 3.23325600  | 0.20513000  | 0.55819200  |
| O  | 4.89096100  | -0.73844000 | -0.46850800 |
| N  | 0.41807400  | -0.43633000 | 2.93003300  |
| O  | 0.26559500  | -0.54635500 | 4.11254600  |

|   |            |             |            |
|---|------------|-------------|------------|
| O | 0.51268400 | 0.68524800  | 2.34975600 |
| O | 0.49062800 | -1.44783500 | 2.15644100 |

AmR<sub>4</sub>PhR<sub>6</sub>(NO<sub>3</sub>)<sub>3</sub> (PBE0/6-311G\*-RECP)

|    |             |             |             |
|----|-------------|-------------|-------------|
| C  | -2.68863100 | 0.49997800  | 0.01006600  |
| C  | -1.66214800 | 2.55666200  | -0.08056800 |
| C  | -2.89856300 | 3.22521900  | -0.11917300 |
| H  | -2.94927900 | 4.30583800  | -0.19843200 |
| C  | -2.56499000 | -0.94094400 | 0.04235200  |
| C  | -3.73939700 | -1.72386700 | 0.07788600  |
| C  | -3.57895800 | -3.12026300 | 0.13348800  |
| C  | -2.32087300 | -3.65858400 | 0.16957200  |
| H  | -4.45581700 | -3.76032600 | 0.16032100  |
| H  | -2.18090900 | -4.73158000 | 0.23593600  |
| N  | -1.33509500 | -1.48122200 | 0.04291100  |
| C  | -3.97849000 | 1.08078600  | -0.01619800 |
| C  | -0.38796600 | 3.25772200  | -0.17678700 |
| H  | -0.84218000 | 5.32686600  | 0.04369600  |
| C  | -1.20636700 | -2.79778600 | 0.12681000  |
| H  | 0.18321300  | -5.57419200 | 0.15723200  |
| H  | 2.69982000  | -5.12978800 | 0.35548700  |
| C  | 0.15298900  | -3.31646300 | 0.20615100  |
| N  | 1.22155100  | -2.47948000 | 0.30550300  |
| N  | 0.76539900  | 2.65740200  | -0.35796600 |
| N  | -1.57046500 | 1.23825700  | 0.00341700  |
| C  | -4.05082800 | 2.48292500  | -0.07433900 |
| H  | -5.02140400 | 2.96913200  | -0.09891700 |
| N  | 2.31521900  | -3.15002500 | 0.37222100  |
| N  | 1.97460500  | -4.43185700 | 0.31966000  |
| C  | 0.64308700  | -4.60173900 | 0.21773600  |
| C  | -5.13882300 | 0.25135000  | 0.01140800  |
| H  | -6.11704000 | 0.72196000  | -0.00637600 |
| C  | -5.02227900 | -1.09882400 | 0.05985900  |
| H  | -5.90676100 | -1.72823600 | 0.08451600  |
| N  | 1.74657600  | 3.58219400  | -0.41345600 |
| H  | 1.67901200  | 5.69720000  | -0.26260500 |
| C  | 1.17344600  | 4.74398000  | -0.26843900 |
| N  | -0.17051700 | 4.59707600  | -0.12166500 |
| Am | 0.87697800  | 0.08719700  | -0.02584800 |
| N  | 3.75927100  | 0.29449400  | -0.02778000 |
| O  | 3.09941900  | -0.02450500 | 1.01317600  |
| O  | 4.95326800  | 0.38056000  | -0.02868600 |
| O  | 3.05848300  | 0.51162200  | -1.06662900 |

|   |             |             |             |
|---|-------------|-------------|-------------|
| N | 0.18085400  | -0.52232500 | -2.84220600 |
| O | -0.10681800 | -0.78883800 | -3.97774700 |
| O | -0.14748600 | 0.57329000  | -2.29694800 |
| O | 0.82191700  | -1.32728800 | -2.09920800 |
| N | 0.23906300  | 0.51500000  | 2.83809900  |
| O | -0.02681400 | 0.70305000  | 3.99478100  |
| O | 0.58993500  | 1.45787800  | 2.06297400  |
| O | 0.17384400  | -0.63052900 | 2.30261300  |

AmR<sub>4</sub>PhR<sub>7</sub>(NO<sub>3</sub>)<sub>3</sub> (PBE0/6-311G\*-RECP)

|   |             |             |             |
|---|-------------|-------------|-------------|
| C | -2.58438300 | -0.97611500 | -0.01573500 |
| C | -1.20150900 | -2.80883400 | 0.08101600  |
| C | -2.28793900 | -3.70073000 | 0.05712300  |
| H | -2.10012800 | -4.76676300 | 0.10114000  |
| C | -2.73329100 | 0.46090300  | -0.01735400 |
| C | -4.03401800 | 1.01133200  | -0.06429500 |
| C | -4.14050600 | 2.41350600  | -0.08510200 |
| C | -3.00739300 | 3.18117800  | -0.08413400 |
| H | -5.12265000 | 2.87575500  | -0.11806000 |
| H | -3.07064100 | 4.26252500  | -0.12909600 |
| N | -1.62683900 | 1.22579400  | 0.01883100  |
| C | -3.74052800 | -1.78866400 | -0.03799700 |
| C | 0.16805300  | -3.29008300 | 0.22941300  |
| C | -1.75226600 | 2.54433600  | -0.03925800 |
| H | -0.90166600 | 5.52982600  | 0.07897900  |
| H | 1.65137700  | 5.56828200  | -0.15691600 |
| C | -0.51535000 | 3.31183800  | -0.09490300 |
| N | 0.68650900  | 2.69204800  | -0.24504500 |
| N | 1.20280300  | -2.42424600 | 0.36890300  |
| N | -1.34483200 | -1.49390100 | 0.01805500  |
| C | -3.55384900 | -3.18387700 | -0.01382100 |
| H | -4.41931900 | -3.83948600 | -0.03734400 |
| N | 1.63777000  | 3.55604200  | -0.27899900 |
| N | 1.06764500  | 4.74758700  | -0.15509600 |
| C | -0.27113100 | 4.66407000  | -0.03818600 |
| C | -5.03495800 | -1.19094700 | -0.07949000 |
| H | -5.90631900 | -1.83846500 | -0.09955600 |
| C | -5.17620100 | 0.15764600  | -0.09332800 |
| H | -6.16266800 | 0.61011000  | -0.12717900 |
| H | 2.39264600  | -5.31743200 | 0.53953300  |
| C | 2.25030800  | -3.20044000 | 0.51383500  |
| H | 3.26698200  | -2.86426800 | 0.65303000  |
| N | 1.84349300  | -4.47755200 | 0.46451800  |
| N | 0.51893100  | -4.55913900 | 0.28528200  |

|    |             |             |             |
|----|-------------|-------------|-------------|
| Am | 0.84109100  | 0.09324600  | 0.01187600  |
| N  | 0.36925000  | 0.53302400  | 2.89629300  |
| O  | 0.18669000  | 0.73249600  | 4.06561600  |
| O  | 0.07010700  | -0.56231700 | 2.33564000  |
| O  | 0.86835800  | 1.41668700  | 2.12865500  |
| N  | 3.75579600  | 0.22633200  | -0.26126300 |
| O  | 3.19102700  | -0.42080700 | 0.68486800  |
| O  | 4.94680700  | 0.23243900  | -0.40004200 |
| O  | 2.97207100  | 0.84566300  | -1.03599200 |
| N  | 0.36778500  | -0.41839800 | -2.85269100 |
| O  | 0.20660600  | -0.62712600 | -4.02298500 |
| O  | 0.93657400  | -1.25854000 | -2.08548700 |
| O  | -0.02695000 | 0.64621200  | -2.28914800 |

AmR<sub>4</sub>PhR<sub>8</sub>(NO<sub>3</sub>)<sub>3</sub> (PBE0/6-311G\*-RECP)

|   |             |             |             |
|---|-------------|-------------|-------------|
| C | 2.61308100  | 0.84560200  | -0.03517000 |
| C | 1.32098600  | 2.74545000  | 0.07217700  |
| C | 2.45449200  | 3.57693100  | 0.06329000  |
| H | 2.35683800  | 4.65525900  | 0.12559400  |
| C | 2.68669300  | -0.59855700 | -0.04443900 |
| C | 3.95689500  | -1.21381200 | -0.09444600 |
| C | 3.99057200  | -2.61984700 | -0.12424700 |
| C | 2.81882700  | -3.32698600 | -0.12795500 |
| H | 4.94698700  | -3.13296700 | -0.15929700 |
| H | 2.82609500  | -4.40990100 | -0.17777400 |
| N | 1.54251800  | -1.30342300 | -0.01210200 |
| C | 3.81148900  | 1.59736500  | -0.04832400 |
| C | -0.03278400 | 3.26307700  | 0.22959900  |
| C | 1.59771800  | -2.62650700 | -0.07820300 |
| H | 0.59353500  | -5.56609600 | -0.01280000 |
| H | -1.96016200 | -5.46629200 | -0.21594200 |
| C | 0.32202800  | -3.32717500 | -0.13384900 |
| N | -0.84768300 | -2.64263900 | -0.25574500 |
| N | -1.09117600 | 2.49608700  | 0.42302800  |
| N | 1.40482000  | 1.42557600  | -0.00336900 |
| C | 3.69466900  | 2.99753800  | -0.01074300 |
| H | 4.59063100  | 3.61073400  | -0.02259500 |
| N | -1.84253500 | -3.45487500 | -0.29585900 |
| N | -1.33416000 | -4.67734500 | -0.20402400 |
| C | 0.00798800  | -4.66607900 | -0.10237300 |
| C | 5.07357800  | 0.93445600  | -0.09206000 |
| H | 5.97795500  | 1.53497300  | -0.10506200 |
| C | 5.14218300  | -0.41952300 | -0.11605300 |
| H | 6.10366700  | -0.92271700 | -0.15177100 |

|    |             |             |             |
|----|-------------|-------------|-------------|
| C  | -2.11328400 | 3.36785200  | 0.56226900  |
| H  | -3.12989100 | 3.05073900  | 0.73633400  |
| N  | -0.43250800 | 4.54505900  | 0.26149700  |
| H  | 0.09910800  | 5.38853200  | 0.12916800  |
| N  | -1.75350100 | 4.63154800  | 0.46996100  |
| Am | -0.86603300 | -0.04063400 | 0.02900600  |
| N  | -0.24104700 | -0.57139100 | 2.87205500  |
| O  | 0.01820800  | -0.81073400 | 4.01931100  |
| O  | 0.12718300  | 0.49728200  | 2.29890400  |
| O  | -0.89279500 | -1.38153800 | 2.14106400  |
| N  | -3.76996100 | -0.06846000 | -0.21200600 |
| O  | -3.16889300 | 0.50350100  | 0.75936600  |
| O  | -4.96261700 | -0.05245200 | -0.31858800 |
| O  | -3.01406100 | -0.64431500 | -1.04964800 |
| N  | -0.33513400 | 0.46828300  | -2.83206900 |
| O  | -0.13397500 | 0.68150000  | -3.99594000 |
| O  | -0.82947800 | 1.34682800  | -2.05722600 |
| O  | -0.05605200 | -0.64002500 | -2.28447000 |

AmR<sub>5</sub>PhR<sub>5</sub>(NO<sub>3</sub>)<sub>3</sub> (PBE0/6-311G\*-RECP)

|   |             |             |             |
|---|-------------|-------------|-------------|
| C | -2.70511000 | 0.81385200  | -0.04317000 |
| C | -1.45383600 | 2.74825500  | -0.00414300 |
| C | -2.60840400 | 3.55038900  | 0.00500200  |
| H | -2.52014600 | 4.63035000  | 0.03191700  |
| C | -2.75373400 | -0.63135200 | -0.05578900 |
| C | -4.01301300 | -1.27328100 | -0.08550900 |
| C | -4.02121400 | -2.67893500 | -0.12599400 |
| C | -2.83709200 | -3.36623500 | -0.15642200 |
| H | -4.96903900 | -3.20849400 | -0.14638400 |
| H | -2.82040500 | -4.44858200 | -0.21140900 |
| N | -1.59732100 | -1.31697900 | -0.04869600 |
| C | -3.91917400 | 1.53854400  | -0.03584200 |
| C | -0.12052700 | 3.33414600  | 0.04751000  |
| H | -0.13480600 | 5.59623800  | 0.05597100  |
| C | -1.63155100 | -2.64300400 | -0.12245000 |
| H | -0.52320300 | -5.56867900 | -0.08143200 |
| C | -0.34209600 | -3.31735600 | -0.19318300 |
| N | 0.76633500  | -2.58703600 | -0.29960800 |
| N | 0.93238600  | 2.52160300  | 0.10261700  |
| N | -1.50571200 | 1.42094100  | -0.04076700 |
| C | -3.83520600 | 2.94191000  | -0.01573100 |
| H | -4.74632700 | 3.53268000  | -0.01112500 |
| N | 1.70231800  | 4.59497400  | 0.15677900  |

|    |             |             |             |
|----|-------------|-------------|-------------|
| N  | 1.38193800  | -4.71342600 | -0.24198500 |
| C  | 0.37575600  | 4.64614100  | 0.08098100  |
| C  | 0.05597900  | -4.66209700 | -0.16299700 |
| C  | -5.16885300 | 0.85075200  | -0.05098400 |
| H  | -6.08379600 | 1.43521000  | -0.04373700 |
| C  | -5.21412400 | -0.50363800 | -0.07760800 |
| H  | -6.16602200 | -1.02547700 | -0.09450000 |
| N  | 1.96716600  | 3.31344700  | 0.16264500  |
| H  | 2.89750800  | 2.91750000  | 0.24330800  |
| N  | 1.73980700  | -3.45721000 | -0.32047200 |
| H  | 2.70098500  | -3.13538700 | -0.34949200 |
| N  | 0.33718000  | -0.32742600 | 2.90748700  |
| N  | 0.82887700  | 0.33277800  | -2.86880700 |
| N  | 3.75617000  | -0.13578500 | 0.23049700  |
| O  | -0.09954600 | -0.30344500 | -2.27068700 |
| O  | 0.84092900  | 0.48042100  | -4.05640200 |
| O  | 1.73451100  | 0.80140700  | -2.11148500 |
| O  | 0.74225800  | -1.28525300 | 2.17248100  |
| O  | 0.14364800  | 0.77275300  | 2.30282400  |
| O  | 0.14550800  | -0.45869600 | 4.08223900  |
| O  | 3.03908000  | -1.10841900 | -0.16683100 |
| O  | 3.09957200  | 0.87368900  | 0.63068500  |
| O  | 4.95038000  | -0.17497200 | 0.22792800  |
| Am | 0.78509200  | -0.03278900 | 0.02022100  |

AmR<sub>5</sub>PhR<sub>6</sub>(NO<sub>3</sub>)<sub>3</sub> (PBE0/6-311G\*-RECP)

|   |             |             |             |
|---|-------------|-------------|-------------|
| C | 2.42561300  | -1.33093400 | 0.00603300  |
| C | 0.80075200  | -2.95763100 | -0.11271000 |
| C | 1.76528700  | -3.98252400 | -0.09229600 |
| H | 1.45589200  | -5.01998900 | -0.14558100 |
| C | 2.77231600  | 0.07332000  | 0.01458000  |
| C | 4.13682700  | 0.44416400  | 0.07509300  |
| C | 4.43094700  | 1.81752900  | 0.11124700  |
| C | 3.41130700  | 2.73424000  | 0.10883000  |
| H | 5.46562800  | 2.14314700  | 0.16023900  |
| H | 3.62930000  | 3.79451200  | 0.17755500  |
| N | 1.78454100  | 0.98043800  | -0.03004200 |
| C | 3.46340500  | -2.28918100 | 0.02518600  |
| C | -0.61675200 | -3.24873000 | -0.27118700 |
| H | -1.07272000 | -5.46360600 | -0.34406900 |
| C | 2.08680700  | 2.26891000  | 0.04121300  |
| H | 1.71502000  | 5.12889400  | -0.18111700 |
| C | 0.94044600  | 3.16553300  | 0.10063700  |
| N | -0.29316000 | 2.75838300  | 0.28899700  |



|    |             |             |             |
|----|-------------|-------------|-------------|
| N  | -1.46951300 | -2.23322400 | -0.38146400 |
| N  | 1.12810300  | -1.67243600 | -0.03262800 |
| C  | 3.08980200  | -3.64485600 | -0.01068500 |
| H  | 3.85687100  | -4.41315900 | 0.01167100  |
| N  | -2.64807400 | -4.09900700 | -0.54871800 |
| C  | -1.37088300 | -4.42719800 | -0.37954000 |
| C  | 4.82710700  | -1.87250000 | 0.07742800  |
| H  | 5.60174100  | -2.63311900 | 0.09621000  |
| C  | 5.15302300  | -0.55668700 | 0.10370100  |
| H  | 6.19168100  | -0.24389700 | 0.14745200  |
| N  | -2.63676100 | -2.78887200 | -0.53868500 |
| H  | -3.45417700 | -2.19542400 | -0.64471900 |
| N  | -1.11801300 | 3.82682700  | 0.30471200  |
| N  | 0.93616000  | 4.51934600  | 0.00103300  |
| C  | -0.36933400 | 4.87893100  | 0.12972400  |
| H  | -0.71957300 | 5.89874100  | 0.08958700  |
| Am | -0.82717100 | 0.23819200  | 0.00192400  |
| N  | -0.38852900 | -0.42498000 | 2.83357100  |
| O  | -0.22632700 | -0.69624100 | 3.98966000  |
| O  | 0.21981400  | 0.53358400  | 2.26605800  |
| O  | -1.17153000 | -1.08742500 | 2.08222000  |
| N  | -3.72918000 | 0.63193500  | 0.29977800  |
| O  | -2.87749300 | 1.26928300  | 0.97416900  |
| O  | -3.23945700 | -0.14808000 | -0.59678100 |
| O  | -4.90958000 | 0.72873700  | 0.46895200  |
| N  | -0.28796800 | 0.60434300  | -2.87923600 |
| O  | -0.04719900 | 0.77624100  | -4.04167000 |
| O  | -0.64796400 | 1.55522300  | -2.11340100 |
| O  | -0.18923100 | -0.52856000 | -2.32105700 |

AmR<sub>5</sub>PhR<sub>7</sub>(NO<sub>3</sub>)<sub>3</sub> (PBE0/6-311G\*-RECP)

|   |             |             |             |
|---|-------------|-------------|-------------|
| C | 2.63837400  | 1.01153000  | -0.06257300 |
| C | 1.25488800  | 2.85115100  | -0.02418100 |
| C | 2.35028100  | 3.73311400  | -0.02708500 |
| H | 2.18582700  | 4.80422400  | -0.00287900 |
| C | 2.78774800  | -0.42520800 | -0.06415200 |
| C | 4.08715900  | -0.98165900 | -0.08183700 |
| C | 4.19366700  | -2.38478100 | -0.10412900 |
| C | 3.06070800  | -3.15289400 | -0.13381000 |
| H | 5.17656800  | -2.84643200 | -0.11066300 |
| H | 3.09604900  | -4.23496600 | -0.17167000 |
| N | 1.68023600  | -1.18831800 | -0.06008900 |
| C | 3.79915200  | 1.81885700  | -0.06167300 |
| C | -0.11525200 | 3.34016800  | 0.04896900  |

|    |             |             |             |
|----|-------------|-------------|-------------|
| H  | -0.26522900 | 5.59703700  | 0.01793800  |
| C  | 1.81382300  | -2.50499400 | -0.11973000 |
| C  | 0.57182300  | -3.26521700 | -0.20664300 |
| N  | -0.62866400 | -2.64137500 | -0.31808800 |
| N  | -1.10399400 | 2.45437900  | 0.14684300  |
| N  | 1.39899900  | 1.53107200  | -0.05958300 |
| C  | 3.61695100  | 3.21297600  | -0.05168900 |
| H  | 4.48416500  | 3.86661100  | -0.05440100 |
| N  | -2.02147900 | 4.46757200  | 0.18577400  |
| C  | -0.70448000 | 4.61316500  | 0.07367200  |
| C  | 5.09289800  | 1.21808700  | -0.06985300 |
| H  | 5.96563400  | 1.86405600  | -0.06820000 |
| C  | 5.23186100  | -0.13042600 | -0.08038900 |
| H  | 6.21772400  | -0.58509800 | -0.08916900 |
| N  | -2.19138200 | 3.17038000  | 0.22065000  |
| H  | -3.08635400 | 2.70486300  | 0.33283300  |
| C  | -1.49478000 | -3.62792500 | -0.37284000 |
| H  | -2.56663600 | -3.52205300 | -0.44566700 |
| N  | -0.82459000 | -4.78592200 | -0.30781100 |
| H  | -1.18697200 | -5.72480800 | -0.32059400 |
| N  | 0.49435100  | -4.58022300 | -0.20093600 |
| Am | -0.80398600 | -0.10332000 | 0.02661200  |
| N  | -0.87142100 | 0.29548800  | -2.87152300 |
| O  | -0.90247200 | 0.44490800  | -4.05948700 |
| O  | 0.07055400  | -0.33305000 | -2.28897600 |
| O  | -1.77089700 | 0.75544900  | -2.10160800 |
| N  | -3.76747900 | -0.31861700 | 0.25828900  |
| O  | -3.02904900 | -1.25118800 | -0.17792900 |
| O  | -3.13949400 | 0.69542000  | 0.70248600  |
| O  | -4.96227800 | -0.38528700 | 0.25776900  |
| N  | -0.25262000 | -0.39935900 | 2.90639000  |
| O  | -0.01972800 | -0.53213600 | 4.07435100  |
| O  | -0.61994000 | -1.37261900 | 2.17149200  |
| O  | -0.14353900 | 0.71610300  | 2.31097500  |

AmR<sub>5</sub>PhR<sub>8</sub>(NO<sub>3</sub>)<sub>3</sub> (PBE0/6-311G\*-RECP)

|   |             |             |             |
|---|-------------|-------------|-------------|
| C | -2.59846300 | 1.09033300  | -0.06292900 |
| C | -1.16070900 | 2.88512300  | -0.00886700 |
| C | -2.23009700 | 3.79952100  | -0.01738300 |
| H | -2.03382500 | 4.86514500  | 0.01079000  |
| C | -2.79102100 | -0.34255600 | -0.06781800 |
| C | -4.10794100 | -0.85998400 | -0.10068100 |
| C | -4.25231300 | -2.25730900 | -0.13032600 |
| C | -3.13920500 | -3.05687600 | -0.14907000 |

|    |             |             |             |
|----|-------------|-------------|-------------|
| H  | -5.24632000 | -2.69338000 | -0.15411800 |
| H  | -3.24082600 | -4.13527800 | -0.20244300 |
| N  | -1.70889300 | -1.13577800 | -0.05024400 |
| C  | -3.73497600 | 1.93012800  | -0.06988700 |
| C  | 0.22218200  | 3.33297900  | 0.07376000  |
| H  | 0.43486900  | 5.58525500  | 0.06646800  |
| C  | -1.87235900 | -2.44951300 | -0.11252900 |
| H  | -1.18541200 | -5.27214100 | -0.05042400 |
| C  | -0.63668100 | -3.21782800 | -0.19017000 |
| N  | 0.56084600  | -2.67510500 | -0.32862800 |
| N  | 1.18531700  | 2.41865500  | 0.16634600  |
| N  | -1.34489600 | 1.57027400  | -0.04901000 |
| C  | -3.51163000 | 3.31863200  | -0.05414300 |
| H  | -4.35845600 | 3.99833400  | -0.06247600 |
| N  | 2.15795100  | 4.40544100  | 0.22935600  |
| C  | 0.84626900  | 4.58890900  | 0.11357100  |
| C  | -5.04613800 | 1.36734600  | -0.09195200 |
| H  | -5.89906100 | 2.03922500  | -0.09662200 |
| C  | -5.22732000 | 0.02395300  | -0.10838600 |
| H  | -6.22639200 | -0.40023500 | -0.12870200 |
| N  | 2.29118200  | 3.10337000  | 0.25176000  |
| H  | 3.17208900  | 2.61043400  | 0.36272500  |
| N  | -0.49256600 | -4.55237300 | -0.16711000 |
| C  | 1.40148100  | -3.73400900 | -0.37623600 |
| H  | 2.47018300  | -3.62682700 | -0.47490600 |
| N  | 0.79675700  | -4.89913100 | -0.28277000 |
| Am | 0.82704200  | -0.13817200 | 0.02794200  |
| N  | 0.17403400  | -0.40995300 | 2.89136600  |
| O  | -0.12115300 | -0.53724000 | 4.04595500  |
| O  | 0.49004600  | -1.40211900 | 2.15745400  |
| O  | 0.18416800  | 0.71674700  | 2.30893200  |
| N  | 3.77524800  | -0.40917100 | 0.22024300  |
| O  | 3.17014000  | 0.60719600  | 0.69749100  |
| O  | 3.01297500  | -1.31828100 | -0.22235900 |
| O  | 4.96762100  | -0.49267600 | 0.19829600  |
| N  | 0.81472300  | 0.30032100  | -2.86424400 |
| O  | 0.80861000  | 0.47110600  | -4.04924900 |
| O  | -0.11732600 | -0.32574200 | -2.26208500 |
| O  | 1.74363800  | 0.73436900  | -2.11517600 |

AmR<sub>6</sub>PhR<sub>6</sub>(NO<sub>3</sub>)<sub>3</sub> (PBE0/6-311G\*-RECP)

|   |            |            |             |
|---|------------|------------|-------------|
| C | 2.63092200 | 0.72441400 | -0.00012200 |
|---|------------|------------|-------------|

|   |             |             |             |
|---|-------------|-------------|-------------|
| C | 1.42704200  | 2.68501000  | -0.00003900 |
| C | 2.60433300  | 3.45542500  | -0.00009900 |
| H | 2.56445700  | 4.53926200  | -0.00008800 |
| C | 2.63121000  | -0.72341300 | -0.00013400 |
| C | 3.86686200  | -1.40941700 | -0.00020300 |
| C | 3.81836400  | -2.81385200 | -0.00021400 |
| C | 2.60570500  | -3.45443700 | -0.00015800 |
| H | 4.74267500  | -3.38356100 | -0.00026800 |
| H | 2.56626000  | -4.53828900 | -0.00017200 |
| N | 1.45244400  | -1.35935200 | -0.00007900 |
| C | 3.86630000  | 1.41090800  | -0.00018200 |
| C | 0.09941400  | 3.28690800  | 0.00004300  |
| H | 0.42342000  | 5.39560600  | -0.00002500 |
| C | 1.42810900  | -2.68448800 | -0.00008700 |
| H | 0.42553800  | -5.39547400 | -0.00008300 |
| C | 0.10071500  | -3.28690400 | -0.00003600 |
| N | -1.02083900 | -2.60493000 | -0.00001300 |
| N | -1.02187700 | 2.60450100  | 0.00011700  |
| N | 1.45190200  | 1.35988300  | -0.00005300 |
| C | 3.81724700  | 2.81532300  | -0.00016900 |
| H | 4.74133300  | 3.38539700  | -0.00021600 |
| N | -0.23532500 | 0.00001600  | -2.87964400 |
| N | -0.23545600 | -0.00012800 | 2.87976100  |
| N | -3.76349300 | -0.00061200 | 0.00015100  |
| O | -0.38176200 | 1.07006600  | 2.21593700  |
| O | 0.03435000  | -0.00010700 | 4.05027000  |
| O | -0.38150500 | -1.07034300 | 2.21591600  |
| O | -0.38167000 | -1.07023400 | -2.21591900 |
| O | -0.38199300 | 1.07017600  | -2.21585000 |
| O | 0.03389700  | 0.00009400  | -4.05028700 |
| O | -3.08145300 | -0.00070400 | 1.07429300  |
| O | -3.08153600 | -0.00031700 | -1.07404400 |
| O | -4.96079000 | -0.00076200 | 0.00019700  |
| N | -2.06392800 | -3.45844500 | 0.00006800  |
| N | -0.20642700 | 4.61201900  | 0.00004100  |
| N | -0.20461200 | -4.61213300 | -0.00005000 |
| N | -2.06529700 | 3.45761100  | 0.00018100  |
| C | -1.56424700 | 4.66195600  | 0.00017900  |
| H | -2.13318600 | 5.57882700  | 0.00023000  |
| C | -1.56241300 | -4.66259700 | 0.00002100  |
| H | -2.13099700 | -5.57968800 | 0.00004700  |
| C | 5.09201300  | 0.67916500  | -0.00025200 |
| H | 6.02722900  | 1.23068000  | -0.00029900 |
| C | 5.09228400  | -0.67718500 | -0.00026200 |

|    |             |             |             |
|----|-------------|-------------|-------------|
| H  | 6.02772000  | -1.22832600 | -0.00031600 |
| Am | -0.87292200 | -0.00018200 | 0.00004200  |

AmR<sub>6</sub>PhR<sub>7</sub>(NO<sub>3</sub>)<sub>3</sub> (PBE0/6-311G\*-RECP)

|    |             |             |             |
|----|-------------|-------------|-------------|
| C  | -2.74550300 | 0.28414800  | 0.00117600  |
| C  | -1.89757000 | 2.42064800  | -0.03661300 |
| C  | -3.18497100 | 2.98282300  | -0.09539200 |
| H  | -3.32427300 | 4.05633600  | -0.16428800 |
| C  | -2.50117900 | -1.14014400 | 0.00956600  |
| C  | -3.60109100 | -2.02539700 | -0.00462100 |
| C  | -3.32166500 | -3.40516600 | 0.02661700  |
| C  | -2.02312500 | -3.83469400 | 0.09587600  |
| H  | -4.14057200 | -4.11818100 | 0.00925400  |
| H  | -1.76448200 | -4.88559800 | 0.14485500  |
| N  | -1.22978900 | -1.57050000 | 0.04080800  |
| C  | -4.07909100 | 0.75316600  | -0.05158800 |
| C  | -0.68668200 | 3.22744200  | -0.10798000 |
| H  | -1.30844700 | 5.24509600  | 0.17148100  |
| H  | 1.17550600  | 5.82718400  | -0.11635100 |
| C  | -0.99760100 | -2.87240600 | 0.11019800  |
| H  | 2.75085900  | -5.13575800 | 0.59805500  |
| C  | 0.40175700  | -3.25977500 | 0.25607200  |
| N  | 1.37993300  | -2.32737000 | 0.37204800  |
| N  | 0.51110300  | 2.72713400  | -0.30277900 |
| N  | -1.69256900 | 1.11393000  | 0.03643300  |
| C  | -4.27061500 | 2.14468900  | -0.08856500 |
| H  | -5.27845800 | 2.54652100  | -0.13088000 |
| N  | 1.41419200  | 3.73007600  | -0.32709800 |
| C  | 0.74874300  | 4.83674900  | -0.15109000 |
| N  | -0.57925300 | 4.57777500  | -0.01347400 |
| C  | -4.93181100 | -1.51058800 | -0.04750800 |
| H  | -5.75960700 | -2.21313700 | -0.06127900 |
| C  | -5.16304000 | -0.17434500 | -0.07225100 |
| H  | -6.17755500 | 0.21062900  | -0.10914300 |
| C  | 2.47437400  | -3.03242600 | 0.52938100  |
| H  | 3.46809100  | -2.63078900 | 0.66087800  |
| N  | 2.14940600  | -4.33405200 | 0.50750900  |
| N  | 0.83251100  | -4.50277400 | 0.33626500  |
| Am | 0.85772400  | 0.16499900  | -0.00817400 |
| N  | 0.31437800  | 0.57110700  | 2.87623700  |
| O  | 0.08248600  | 0.75697400  | 4.03973200  |
| O  | 0.19149900  | -0.56378200 | 2.32901500  |
| O  | 0.68869800  | 1.50863400  | 2.10263900  |
| N  | 3.75151300  | 0.46582300  | -0.27700400 |

|   |             |             |             |
|---|-------------|-------------|-------------|
| O | 3.22255800  | -0.16026000 | 0.70513700  |
| O | 2.93450600  | 0.98882700  | -1.08687200 |
| O | 4.94016300  | 0.53586900  | -0.41459400 |
| N | 0.28931600  | -0.47818200 | -2.83468600 |
| O | 0.07499300  | -0.74149800 | -3.98563000 |
| O | 1.00759400  | -1.21667900 | -2.09114500 |
| O | -0.19695200 | 0.54737100  | -2.26897700 |

AmR<sub>6</sub>PhR<sub>8</sub>(NO<sub>3</sub>)<sub>3</sub> (PBE0/6-311G\*-RECP)

|   |             |             |             |
|---|-------------|-------------|-------------|
| C | 2.70391800  | 0.45302700  | -0.02285200 |
| C | 1.72303700  | 2.53132200  | -0.06824700 |
| C | 2.97337000  | 3.17156300  | -0.13563500 |
| H | 3.04600800  | 4.25129200  | -0.20908700 |
| C | 2.55047500  | -0.98517800 | -0.00631000 |
| C | 3.70596900  | -1.79912800 | -0.01251100 |
| C | 3.51174900  | -3.19058800 | 0.03439600  |
| C | 2.24062500  | -3.69929900 | 0.10879200  |
| H | 4.37168900  | -3.85338900 | 0.02818600  |
| H | 2.08429700  | -4.77040600 | 0.17583500  |
| N | 1.31178100  | -1.49458400 | 0.02425800  |
| C | 4.00511700  | 1.00276200  | -0.08224300 |
| C | 0.46328900  | 3.25976200  | -0.13318500 |
| H | 0.95891300  | 5.31830900  | 0.10477400  |
| H | -1.56059000 | 5.73542600  | -0.14853000 |
| C | 1.15341200  | -2.80721700 | 0.10740500  |
| C | -0.22856900 | -3.24727700 | 0.25795800  |
| N | -1.24734700 | -2.42144000 | 0.41951000  |
| N | -0.70316400 | 2.68165700  | -0.30117000 |
| N | 1.60167800  | 1.21435500  | 0.01210300  |
| C | 4.10937700  | 2.40337300  | -0.12814900 |
| H | 5.08975300  | 2.86758500  | -0.17563100 |
| N | -1.66802800 | 3.62402600  | -0.32555800 |
| C | -1.07187600 | 4.77380900  | -0.17598300 |
| N | 0.27159400  | 4.60204700  | -0.05596700 |
| C | 5.00211400  | -1.20298800 | -0.06143800 |
| H | 5.87305000  | -1.85116200 | -0.06977800 |
| C | 5.14591300  | 0.14489700  | -0.09824000 |
| H | 6.13372500  | 0.59343800  | -0.14007800 |
| C | -2.31487100 | -3.23430300 | 0.56766100  |
| H | -3.31517500 | -2.86077200 | 0.72407000  |
| N | -0.69602500 | -4.50560000 | 0.31453200  |
| H | -0.20830800 | -5.37919600 | 0.21207300  |
| N | -2.02125500 | -4.51753400 | 0.50909700  |

|    |             |             |             |
|----|-------------|-------------|-------------|
| Am | -0.88467800 | 0.10170100  | 0.00732100  |
| N  | -0.24366500 | -0.51684200 | -2.81566500 |
| O  | 0.01373900  | -0.77680100 | -3.95916700 |
| O  | -0.87686200 | -1.32033400 | -2.06297700 |
| O  | 0.11285900  | 0.56977400  | -2.26842300 |
| N  | -3.77358200 | 0.27723000  | -0.25306500 |
| O  | -2.98319200 | 0.76250900  | -1.11509000 |
| O  | -3.20844200 | -0.27471300 | 0.75291200  |
| O  | -4.96437000 | 0.32057700  | -0.36631200 |
| N  | -0.22085900 | 0.58478300  | 2.85791900  |
| O  | 0.06955000  | 0.80539000  | 4.00217800  |
| O  | 0.00124200  | -0.53187700 | 2.30227100  |
| O  | -0.75766600 | 1.46340100  | 2.11362800  |

AmR<sub>7</sub>PhR<sub>7</sub>(NO<sub>3</sub>)<sub>3</sub> (PBE0/6-311G\*-RECP)

|   |             |             |             |
|---|-------------|-------------|-------------|
| C | 2.72185000  | -0.72136700 | -0.12012200 |
| C | 1.53309100  | -2.68007400 | -0.23977500 |
| C | 2.70402500  | -3.45736300 | -0.23043300 |
| H | 2.62469000  | -4.53647900 | -0.28426600 |
| C | 2.72198400  | 0.72131300  | -0.11992100 |
| C | 3.95528400  | 1.41028800  | -0.10316400 |
| C | 3.91250300  | 2.81636900  | -0.14998200 |
| C | 2.70466400  | 3.45734900  | -0.22941100 |
| H | 4.83965200  | 3.38160400  | -0.13386800 |
| H | 2.62553200  | 4.53649900  | -0.28290400 |
| N | 1.53961500  | 1.35807300  | -0.16817400 |
| C | 3.95501400  | -1.41057400 | -0.10354900 |
| C | 0.21500800  | -3.29722000 | -0.34063800 |
| C | 1.53360000  | 2.68027200  | -0.23894700 |
| C | 0.21555600  | 3.29755500  | -0.33946400 |
| N | -0.90906000 | 2.53822700  | -0.36615300 |
| N | -0.90963100 | -2.53792400 | -0.36779200 |
| N | 1.53934800  | -1.35789800 | -0.16854900 |
| C | 3.91197600  | -2.81663500 | -0.15076400 |
| H | 4.83902300  | -3.38204100 | -0.13479000 |
| C | -1.88297500 | -3.41645700 | -0.44881900 |
| H | -2.93785000 | -3.18887800 | -0.45997600 |
| C | -1.88246200 | 3.41669900  | -0.44713300 |
| H | -2.93732800 | 3.18906600  | -0.45803200 |
| C | 5.17886000  | -0.67856400 | -0.05590400 |
| H | 6.11355300  | -1.23048500 | -0.02931100 |
| C | 5.17899100  | 0.67803500  | -0.05572100 |
| H | 6.11379100  | 1.22976700  | -0.02897900 |

|    |             |             |             |
|----|-------------|-------------|-------------|
| N  | -0.00956300 | -4.59372500 | -0.40959700 |
| N  | -0.00905600 | 4.59403900  | -0.40857200 |
| N  | -1.34642100 | 4.64424100  | -0.47831500 |
| H  | -1.81294400 | 5.53436200  | -0.53317400 |
| N  | -1.34689600 | -4.64398700 | -0.47967700 |
| H  | -1.81338300 | -5.53412900 | -0.53450600 |
| N  | -1.32728700 | 0.00135200  | -2.77699200 |
| N  | 0.05961400  | -0.00155600 | 2.90676200  |
| N  | -3.63881000 | 0.00007400  | 0.89729700  |
| O  | -0.15323800 | 1.07325400  | 2.26189400  |
| O  | 0.44265700  | -0.00229800 | 4.04281300  |
| O  | -0.15528700 | -1.07557700 | 2.26119900  |
| O  | -2.27171800 | 0.00230200  | -1.93092600 |
| O  | -0.15280100 | -0.00011700 | -2.28918900 |
| O  | -1.52536000 | 0.00180000  | -3.96193400 |
| O  | -2.96493400 | 1.06903000  | 0.78163300  |
| O  | -2.96549100 | -1.06903200 | 0.77965700  |
| O  | -4.81973900 | 0.00018800  | 1.10110900  |
| Am | -0.80718100 | 0.00000100  | 0.12095300  |

AmR<sub>7</sub>PhR<sub>8</sub>(NO<sub>3</sub>)<sub>3</sub> (PBE0/6-311G\*-RECP)

|   |             |             |             |
|---|-------------|-------------|-------------|
| C | 2.64819400  | 0.84567700  | 0.00828500  |
| C | 1.37136100  | 2.75269300  | 0.06055000  |
| C | 2.50754100  | 3.58106400  | 0.05403400  |
| H | 2.37959900  | 4.65638900  | 0.08521900  |
| C | 2.71663200  | -0.59720700 | 0.01958500  |
| C | 3.98394000  | -1.22600700 | 0.00623600  |
| C | 4.00634700  | -2.63119400 | -0.00851100 |
| C | 2.82812500  | -3.33145200 | -0.03968300 |
| H | 4.95867500  | -3.15270100 | -0.01567300 |
| H | 2.83558600  | -4.41482600 | -0.08890600 |
| N | 1.56966700  | -1.29328700 | 0.03018600  |
| C | 3.84906200  | 1.58895000  | 0.00797200  |
| C | 0.02850900  | 3.31090900  | 0.17266900  |
| C | 1.61812300  | -2.61611000 | -0.02809600 |
| C | 0.31998200  | -3.26759500 | -0.14815800 |
| N | -0.80928200 | -2.61378300 | -0.35652800 |
| N | -1.05490600 | 2.50367700  | 0.28790000  |
| N | 1.43873900  | 1.43070500  | 0.01022500  |
| C | 3.74343800  | 2.99280000  | 0.01676300  |
| H | 4.64518000  | 3.59780200  | 0.00825400  |
| C | -2.06073900 | 3.33791100  | 0.40613100  |
| H | -3.09710200 | 3.06002100  | 0.52546800  |
| C | -1.74429500 | -3.58578800 | -0.44183500 |



|    |             |             |             |
|----|-------------|-------------|-------------|
| H  | -2.78904200 | -3.37549200 | -0.60881100 |
| C  | 5.10743000  | 0.91570300  | 0.00210800  |
| H  | 6.01482400  | 1.51201600  | -0.00114400 |
| C  | 5.17362500  | -0.43881500 | 0.00058300  |
| H  | 6.13370900  | -0.94558800 | -0.00677500 |
| N  | -0.25203200 | 4.59795300  | 0.21601100  |
| N  | -1.58252500 | 4.59024200  | 0.36328300  |
| H  | -2.08596500 | 5.45947300  | 0.42514500  |
| N  | -1.26285400 | -4.80363400 | -0.30363700 |
| N  | 0.04615900  | -4.58195900 | -0.12061300 |
| H  | 0.65837300  | -5.36332700 | 0.04153200  |
| Am | -0.85117800 | -0.05048100 | -0.01538200 |
| N  | -0.41082700 | -0.48365000 | 2.87384200  |
| O  | -0.23416700 | -0.67543600 | 4.04471200  |
| O  | -0.14002300 | 0.62058300  | 2.31437000  |
| O  | -0.87370900 | -1.38334500 | 2.10120600  |
| N  | -0.40579900 | 0.48106200  | -2.87881300 |
| O  | -0.23673400 | 0.70212100  | -4.04499100 |
| O  | -1.17390500 | 1.19082000  | -2.15603200 |
| O  | 0.17917100  | -0.46922600 | -2.27337400 |
| N  | -3.79997600 | -0.15401100 | -0.00682700 |
| O  | -3.15069000 | 0.67118100  | 0.71154800  |
| O  | -4.99737000 | -0.18035300 | -0.02933800 |
| O  | -3.08634600 | -0.94391000 | -0.69810000 |

AmR<sub>8</sub>PhR<sub>8</sub>(NO<sub>3</sub>)<sub>3</sub> (PBE0/6-311G\*-RECP)

|   |             |             |             |
|---|-------------|-------------|-------------|
| C | -2.65905100 | 0.72196100  | 0.00437900  |
| C | -1.46624300 | 2.68550800  | -0.05372100 |
| C | -2.64230700 | 3.45633100  | -0.06221500 |
| H | -2.59960600 | 4.53884400  | -0.11163800 |
| C | -2.65846400 | -0.72407000 | -0.00595400 |
| C | -3.89406700 | -1.41073900 | 0.00413800  |
| C | -3.84982400 | -2.81572700 | 0.02188800  |
| C | -2.63949700 | -3.45840200 | 0.06099800  |
| H | -4.77598400 | -3.38231600 | 0.02465800  |
| H | -2.59590800 | -4.54086300 | 0.11081100  |
| N | -1.48016000 | -1.36320300 | -0.01125600 |
| C | -3.89521500 | 1.40761900  | -0.00610300 |
| C | -0.13865800 | 3.27281300  | -0.18352300 |
| H | -0.37904900 | 5.38839300  | -0.06194000 |
| C | -1.46406700 | -2.68660800 | 0.05282200  |
| H | -0.37437000 | -5.38841300 | 0.05837700  |
| C | -0.13609400 | -3.27283500 | 0.18357000  |
| N | 0.96051700  | -2.56063700 | 0.37289600  |

|    |             |             |             |
|----|-------------|-------------|-------------|
| N  | 0.95883300  | 2.56136900  | -0.37047700 |
| N  | -1.48126500 | 1.36206500  | 0.01011600  |
| C  | -3.85211600 | 2.81264600  | -0.02369000 |
| H  | -4.77873900 | 3.37847800  | -0.02668100 |
| N  | 0.30043500  | 0.54873400  | 2.84060000  |
| N  | 0.30336200  | -0.54776600 | -2.83994200 |
| N  | 3.80331000  | 0.00103300  | -0.00119400 |
| O  | -0.07938200 | 0.52036800  | -2.27433500 |
| O  | 0.06373100  | -0.79045900 | -3.99006600 |
| O  | 0.94605000  | -1.35349400 | -2.09519200 |
| O  | 0.94769300  | 1.35229800  | 2.09755400  |
| O  | -0.08565700 | -0.51750000 | 2.27357900  |
| O  | 0.05954000  | 0.79167400  | 3.99040400  |
| O  | 3.12078200  | -0.73524000 | 0.77963300  |
| O  | 3.11961500  | 0.73695000  | -0.78127900 |
| O  | 5.00007800  | 0.00125200  | -0.00184400 |
| N  | 0.19608800  | 4.57385900  | -0.19434300 |
| N  | 0.19981400  | -4.57357700 | 0.19304700  |
| C  | 1.93723000  | 3.48528300  | -0.48534100 |
| H  | 2.97046100  | 3.22257200  | -0.65017600 |
| C  | 1.93963800  | -3.48384200 | 0.48751300  |
| H  | 2.97247400  | -3.22039900 | 0.65366200  |
| N  | 1.51318900  | 4.72835800  | -0.38336000 |
| N  | 1.51682200  | -4.72715800 | 0.38350300  |
| C  | -5.12068900 | 0.67594600  | -0.00424800 |
| H  | -6.05590200 | 1.22732800  | -0.00860100 |
| C  | -5.12013700 | -0.68006800 | 0.00185000  |
| H  | -6.05490100 | -1.23221300 | 0.00590900  |
| Am | 0.87739700  | 0.00026700  | 0.00070200  |

EuR<sub>1</sub>PhR<sub>1</sub>(NO<sub>3</sub>)<sub>3</sub> (PBE0/6-311G\*-RECP)

|   |             |             |             |
|---|-------------|-------------|-------------|
| C | -2.65806900 | 0.75431100  | -0.00430200 |
| C | -1.44905500 | 2.71431300  | 0.01559900  |
| C | -2.62308300 | 3.48900600  | 0.05046200  |
| H | -2.55766100 | 4.57037100  | 0.07921400  |
| C | -2.67186700 | -0.69040400 | -0.03446000 |
| C | -3.91610200 | -1.36108500 | -0.05654000 |
| C | -3.89132400 | -2.76524600 | -0.12787400 |
| C | -2.69189100 | -3.42090200 | -0.19502500 |
| H | -4.82662200 | -3.31711800 | -0.14446300 |
| H | -2.64943900 | -4.50058900 | -0.27691300 |
| N | -1.49788400 | -1.34653100 | -0.05809700 |
| C | -3.88875200 | 1.44969300  | 0.02948900  |
| C | -0.12845500 | 3.33259100  | 0.03843300  |

|    |             |             |             |
|----|-------------|-------------|-------------|
| C  | 0.28894000  | 4.67694300  | 0.02403900  |
| H  | -0.31165900 | 5.57151200  | -0.02600500 |
| C  | 1.66537400  | 4.60993100  | 0.08522200  |
| H  | 2.42023900  | 5.38077100  | 0.10197200  |
| H  | 2.89084100  | 2.84899800  | 0.21651600  |
| C  | -1.50098900 | -2.67157800 | -0.16316800 |
| C  | 0.17353000  | -4.67777000 | -0.24177400 |
| C  | 1.54899400  | -4.65749500 | -0.33067800 |
| H  | -0.45440200 | -5.55080200 | -0.15896900 |
| H  | 2.83617000  | -2.94307100 | -0.41485200 |
| H  | 2.27845700  | -5.45249800 | -0.34345200 |
| C  | -0.19913800 | -3.32032300 | -0.26069400 |
| N  | 0.87842000  | -2.54732200 | -0.36685400 |
| N  | 0.92615800  | 2.52507500  | 0.10206400  |
| N  | -1.47326200 | 1.38691600  | -0.02128300 |
| C  | -3.83603300 | 2.85457900  | 0.05457200  |
| H  | -4.76009300 | 3.42466000  | 0.08059800  |
| N  | 1.98997600  | 3.30626400  | 0.12666600  |
| N  | 1.91471000  | -3.36609800 | -0.40421500 |
| N  | 0.53898000  | -0.39623800 | 2.87306500  |
| N  | 0.93888400  | 0.40206800  | -2.82463400 |
| N  | 3.78754000  | -0.05569500 | 0.28950800  |
| O  | 1.86444000  | 0.79403700  | -2.05178400 |
| O  | 0.97214800  | 0.57516700  | -4.01015800 |
| O  | -0.03192400 | -0.18770300 | -2.25110300 |
| O  | 0.05124600  | 0.60869300  | 2.26709400  |
| O  | 1.14620000  | -1.23123300 | 2.13387000  |
| O  | 0.42763200  | -0.54734900 | 4.05732400  |
| O  | 3.08769700  | 0.92614500  | 0.68456300  |
| O  | 3.11879600  | -1.02886700 | -0.16453800 |
| O  | 4.98396200  | -0.06079500 | 0.34289800  |
| C  | -5.13490300 | -0.62162800 | -0.01474700 |
| H  | -6.07393900 | -1.16675900 | -0.02315600 |
| C  | -5.12168600 | 0.73310300  | 0.02983200  |
| H  | -6.04996200 | 1.29561900  | 0.06052300  |
| Eu | 0.83299900  | -0.01386000 | 0.02190200  |

EuR<sub>1</sub>PhR<sub>2</sub>(NO<sub>3</sub>)<sub>3</sub> (PBE0/6-311G\*-RECP)

|   |             |             |             |
|---|-------------|-------------|-------------|
| C | -2.70393000 | 0.50512000  | -0.10560200 |
| C | -1.65493100 | 2.55086800  | -0.24174500 |
| C | -2.89242900 | 3.22681900  | -0.23842100 |
| H | -2.92171500 | 4.30849100  | -0.30408500 |
| C | -2.59753800 | -0.93465900 | -0.09993700 |

|    |             |             |             |
|----|-------------|-------------|-------------|
| C  | -3.77977400 | -1.70999700 | -0.09152000 |
| C  | -3.63204100 | -3.10809800 | -0.12614900 |
| C  | -2.37868900 | -3.65748700 | -0.16800900 |
| H  | -4.51505500 | -3.74050800 | -0.12123100 |
| H  | -2.24058400 | -4.73214400 | -0.19439100 |
| N  | -1.37308600 | -1.48270600 | -0.12807300 |
| C  | -3.98699000 | 1.09548000  | -0.10175200 |
| C  | -0.39839000 | 3.26850500  | -0.37902100 |
| C  | -0.14318900 | 4.61291900  | -0.48499900 |
| H  | -0.78129200 | 5.48160500  | -0.48222500 |
| H  | 1.74039700  | 5.56649000  | -0.68761500 |
| C  | -1.25918800 | -2.80402200 | -0.16247300 |
| C  | 0.61199800  | -4.63813100 | -0.23323700 |
| C  | 1.98016300  | -4.47825600 | -0.15318700 |
| H  | 0.07555900  | -5.56947400 | -0.32475900 |
| H  | 3.07291200  | -2.64468300 | 0.10545500  |
| H  | 2.78666700  | -5.19514000 | -0.15600100 |
| C  | 0.10153600  | -3.32811300 | -0.16821300 |
| N  | 1.09714700  | -2.45195900 | -0.06339500 |
| N  | 0.78502200  | 2.57612600  | -0.43355300 |
| N  | -1.57100000 | 1.22986800  | -0.14675200 |
| C  | -4.04786800 | 2.50061500  | -0.15433000 |
| H  | -5.01447000 | 2.99589700  | -0.14469000 |
| N  | 2.21303200  | -3.15844200 | -0.05836200 |
| C  | -5.05544700 | -1.07400200 | -0.05992400 |
| H  | -5.94625800 | -1.69471500 | -0.04036800 |
| C  | -5.15512300 | 0.27871700  | -0.06347500 |
| H  | -6.12739400 | 0.76203800  | -0.04730500 |
| C  | 1.73566600  | 3.46566100  | -0.56064600 |
| H  | 2.79091500  | 3.24388300  | -0.59503400 |
| N  | 1.21499000  | 4.71298100  | -0.60149700 |
| N  | 3.74296200  | 0.22483700  | 0.73591200  |
| O  | 4.93633700  | 0.25820600  | 0.85205800  |
| O  | 3.05447300  | 1.23762400  | 0.43481900  |
| O  | 3.07219700  | -0.84156400 | 0.91268400  |
| N  | 1.32103500  | -0.20363900 | -2.71697800 |
| O  | 2.25738200  | -0.31111100 | -1.86814900 |
| O  | 0.17334300  | 0.04144300  | -2.23063400 |
| O  | 1.50495700  | -0.32369600 | -3.89649100 |
| N  | 0.06802800  | 0.35473300  | 2.87535800  |
| O  | -0.27944500 | 0.47347500  | 4.01783100  |
| O  | 0.44333800  | 1.34485900  | 2.17350300  |
| O  | 0.08041400  | -0.76770100 | 2.28231300  |
| Eu | 0.86010200  | 0.08066300  | 0.10930200  |

EuR<sub>1</sub>PhR<sub>3</sub>(NO<sub>3</sub>)<sub>3</sub> (PBE0/6-311G\*-RECP)

|   |             |             |             |
|---|-------------|-------------|-------------|
| C | -2.68612600 | -0.49024600 | -0.12188600 |
| C | -1.63130800 | -2.52933500 | -0.25088400 |
| C | -2.86210800 | -3.21312700 | -0.23594000 |
| H | -2.90072300 | -4.29593700 | -0.28693700 |
| C | -2.57819800 | 0.94882800  | -0.12338600 |
| C | -3.75812800 | 1.72458700  | -0.12425000 |
| C | -3.60511500 | 3.12170600  | -0.17986600 |
| C | -2.34903200 | 3.66424900  | -0.24049900 |
| H | -4.48473100 | 3.75873400  | -0.18064400 |
| H | -2.20753100 | 4.73761100  | -0.29057500 |
| N | -1.35148100 | 1.48823300  | -0.15621300 |
| C | -3.96854600 | -1.08514600 | -0.10970400 |
| C | -0.35410500 | -3.20594000 | -0.38555100 |
| H | -0.85339400 | -5.25833400 | -0.52582800 |
| C | 1.19554800  | -4.74788900 | -0.64364300 |
| H | 1.61515600  | -5.73376200 | -0.76214400 |
| H | 2.81242700  | -3.23178300 | -0.60010600 |
| C | -1.23141100 | 2.80759200  | -0.22410500 |
| C | 0.64805900  | 4.62648300  | -0.36600100 |
| C | 2.01657000  | 4.45973200  | -0.31455200 |
| H | 0.11503500  | 5.55932100  | -0.46185100 |
| H | 3.10480000  | 2.62805000  | -0.03965700 |
| H | 2.82706500  | 5.17122000  | -0.34949100 |
| C | 0.13171600  | 3.32142100  | -0.26457300 |
| N | 1.12444300  | 2.44012100  | -0.16675000 |
| N | 0.80060200  | -2.56677600 | -0.41878700 |
| N | -1.55434900 | -1.20760400 | -0.16878700 |
| C | -4.02242100 | -2.48920100 | -0.15311600 |
| H | -4.98555200 | -2.99053400 | -0.13502000 |
| N | 2.24391800  | 3.14050500  | -0.20034600 |
| C | -5.03379000 | 1.08659000  | -0.08275600 |
| H | -5.92486200 | 1.70701100  | -0.06683400 |
| C | -5.13593500 | -0.26634700 | -0.07311400 |
| H | -6.10915100 | -0.74714100 | -0.04897400 |
| C | 1.77078000  | -3.50773900 | -0.57439400 |
| N | -0.15117800 | -4.53914200 | -0.52143400 |
| N | 1.40881500  | 0.04580300  | -2.69985900 |
| O | 1.61719900  | 0.08766200  | -3.88213300 |
| O | 2.34525700  | 0.01986000  | -1.84616400 |
| O | 0.23070000  | 0.02558200  | -2.22319000 |
| N | -0.05887700 | -0.24224400 | 2.88022700  |
| O | 0.20539600  | -1.27847900 | 2.19674300  |

|    |             |             |            |
|----|-------------|-------------|------------|
| O  | 0.14451500  | 0.86685200  | 2.29602900 |
| O  | -0.47946100 | -0.30599700 | 4.00358500 |
| N  | 3.68928600  | -0.23461100 | 0.89464100 |
| O  | 3.04784500  | 0.86650400  | 0.85442600 |
| O  | 4.87299700  | -0.27688100 | 1.07213200 |
| O  | 2.97494100  | -1.25976600 | 0.73749900 |
| Eu | 0.87268900  | -0.07769000 | 0.13947800 |

EuR<sub>1</sub>PhR<sub>4</sub>(NO<sub>3</sub>)<sub>3</sub> (PBE0/6-311G\*-RECP)

|   |             |             |             |
|---|-------------|-------------|-------------|
| C | -2.69274500 | 0.36726800  | 0.00297100  |
| C | -1.80546300 | 2.48673500  | -0.05414400 |
| C | -3.07778800 | 3.07363900  | 0.07765200  |
| H | -3.18466000 | 4.15230100  | 0.10602400  |
| C | -2.48297900 | -1.06042000 | -0.07101600 |
| C | -3.60596100 | -1.91774700 | -0.05821100 |
| C | -3.36404500 | -3.29615300 | -0.19974600 |
| C | -2.08165200 | -3.74899400 | -0.35992500 |
| H | -4.19958100 | -3.99001700 | -0.19417700 |
| H | -1.87557300 | -4.80467500 | -0.49217900 |
| N | -1.22543900 | -1.51950300 | -0.17924300 |
| C | -4.01112500 | 0.86205900  | 0.12398300  |
| C | -0.59909300 | 3.29444700  | -0.18481300 |
| C | -0.39516800 | 4.65243300  | -0.25839200 |
| H | -1.05116000 | 5.50657400  | -0.22863700 |
| H | 1.49990500  | 5.59646500  | -0.48175700 |
| C | -1.02213600 | -2.82213500 | -0.34394900 |
| C | 0.95741300  | -4.51806000 | -0.59631200 |
| C | 2.31144900  | -4.26433000 | -0.65791100 |
| H | 0.48292000  | -5.48663100 | -0.60283400 |
| H | 3.29822400  | -2.36601300 | -0.52217400 |
| H | 3.16199300  | -4.92513300 | -0.72288600 |
| C | 0.36525000  | -3.24426200 | -0.50288600 |
| N | 1.30240400  | -2.29988000 | -0.52495300 |
| N | 0.62075000  | 2.69887900  | -0.28045800 |
| N | -1.62472100 | 1.17632100  | -0.07846900 |
| C | -4.17382400 | 2.25814300  | 0.17095900  |
| H | -5.16991300 | 2.67839000  | 0.27353400  |
| N | 2.45986300  | -2.92864400 | -0.61547800 |
| C | -4.91918900 | -1.37877600 | 0.08391800  |
| H | -5.76167800 | -2.06339300 | 0.11002500  |
| C | -5.11469600 | -0.04014200 | 0.17784700  |
| H | -6.11571400 | 0.36714800  | 0.28297800  |
| N | 1.54691500  | 3.58517900  | -0.40668500 |
| N | 0.94139000  | 4.76254600  | -0.39526000 |

|    |             |             |             |
|----|-------------|-------------|-------------|
| N  | 0.22314600  | -0.40231400 | 2.81415700  |
| O  | -0.02028400 | -0.59058200 | 3.97431700  |
| O  | 0.92472500  | -1.20025700 | 2.12607700  |
| O  | -0.22073200 | 0.61263200  | 2.18823600  |
| N  | 3.55556000  | 0.41165900  | 1.08825400  |
| O  | 4.66268500  | 0.50670900  | 1.53550000  |
| O  | 2.63495800  | 1.23840700  | 1.34377900  |
| O  | 3.21802400  | -0.53911800 | 0.31216400  |
| N  | 1.10936400  | 0.45735100  | -2.81795900 |
| O  | -0.00158700 | 0.18526500  | -2.26712300 |
| O  | 2.09825400  | 0.54894300  | -2.02940100 |
| O  | 1.21495300  | 0.61677900  | -4.00364500 |
| Eu | 0.86878000  | 0.13478400  | 0.04294200  |

EuR<sub>1</sub>PhR<sub>5</sub>(NO<sub>3</sub>)<sub>3</sub> (PBE0/6-311G\*-RECP)

|   |             |             |             |
|---|-------------|-------------|-------------|
| C | -2.67614400 | -0.61646300 | -0.09766000 |
| C | -1.55711300 | -2.62245300 | -0.26113600 |
| C | -2.76356500 | -3.34371400 | -0.29970000 |
| H | -2.74842600 | -4.42319700 | -0.39637600 |
| C | -2.62092200 | 0.82651800  | -0.05864900 |
| C | -3.83093200 | 1.55616600  | -0.04239300 |
| C | -3.73734700 | 2.95916800  | -0.04220400 |
| C | -2.50595500 | 3.55713500  | -0.06654600 |
| H | -4.64391200 | 3.55693300  | -0.02808000 |
| H | -2.40961100 | 4.63653400  | -0.07143600 |
| N | -1.41762500 | 1.42244700  | -0.06791100 |
| C | -3.93690500 | -1.25539900 | -0.12694500 |
| C | -0.26849400 | -3.29153300 | -0.37438900 |
| C | 0.12985800  | -4.63595300 | -0.41402600 |
| H | -0.44916800 | -5.54591600 | -0.38690400 |
| H | 2.77321400  | -3.10134000 | -0.45228900 |
| C | -1.35413600 | 2.74884400  | -0.07789000 |
| C | 0.44086800  | 4.65966700  | -0.11683400 |
| C | 1.81597900  | 4.55276200  | -0.07729400 |
| H | -0.13360300 | 5.57159700  | -0.15926200 |
| H | 2.99038800  | 2.76068800  | 0.07179900  |
| H | 2.59269100  | 5.30178100  | -0.07477900 |
| C | -0.01576000 | 3.32882800  | -0.08784000 |
| N | 1.01655500  | 2.49102900  | -0.04055100 |
| N | 0.83894800  | -2.55456100 | -0.43321600 |
| N | -1.51976800 | -1.30062300 | -0.13537400 |
| C | -3.94684100 | -2.65853300 | -0.21725800 |
| H | -4.89510700 | -3.18740000 | -0.23808600 |

|    |             |             |             |
|----|-------------|-------------|-------------|
| N  | 2.10381100  | 3.24074700  | -0.03647600 |
| C  | -5.08286900 | 0.87225900  | -0.04032800 |
| H  | -5.99558600 | 1.45989000  | -0.01461800 |
| C  | -5.13474800 | -0.48191200 | -0.08170900 |
| H  | -6.08903600 | -0.99961800 | -0.09079400 |
| N  | 1.81276300  | -3.42257100 | -0.49382600 |
| N  | 1.45657600  | -4.68194100 | -0.48297300 |
| N  | 0.20144300  | -0.38050000 | 2.88413200  |
| O  | -0.07685800 | -0.53098400 | 4.03988600  |
| O  | 0.65728000  | -1.32369800 | 2.16502900  |
| O  | 0.05551200  | 0.73291400  | 2.28892700  |
| N  | 3.73730900  | -0.18070600 | 0.58267600  |
| O  | 3.07513100  | 0.87811600  | 0.81275100  |
| O  | 3.02754600  | -1.18747200 | 0.29032400  |
| O  | 4.93142900  | -0.22391300 | 0.64167300  |
| N  | 1.21564400  | 0.31500900  | -2.74336900 |
| O  | 0.08291400  | 0.06972300  | -2.21682200 |
| O  | 2.18837400  | 0.36980100  | -1.93338000 |
| O  | 1.34736700  | 0.48263600  | -3.92336300 |
| Eu | 0.83887600  | -0.02758000 | 0.09818500  |

EuR<sub>1</sub>PhR<sub>6</sub>(NO<sub>3</sub>)<sub>3</sub> (PBE0/6-311G\*-RECP)

|   |             |             |             |
|---|-------------|-------------|-------------|
| C | 2.71274700  | -0.35244000 | 0.06168200  |
| C | 1.78816100  | -2.44868200 | 0.17996700  |
| C | 3.04861400  | -3.06427800 | 0.08917100  |
| H | 3.14811400  | -4.14446600 | 0.09824900  |
| C | 2.52048700  | 1.07930900  | 0.08216700  |
| C | 3.65444300  | 1.91995400  | 0.05712300  |
| C | 3.42628700  | 3.30519500  | 0.14628500  |
| C | 2.14578300  | 3.77507700  | 0.26973800  |
| H | 4.26859200  | 3.99057400  | 0.12914000  |
| H | 1.94877300  | 4.83694000  | 0.35962400  |
| N | 1.26635900  | 1.54970800  | 0.15331400  |
| C | 4.02577400  | -0.87319900 | -0.02119000 |
| C | 0.54978400  | -3.20239300 | 0.32120800  |
| H | 1.11352200  | -5.25394900 | 0.41390900  |
| C | -0.94121600 | -4.74214700 | 0.56939600  |
| H | -1.39870800 | -5.71290400 | 0.68259800  |
| C | 1.07586000  | 2.85899200  | 0.26937900  |
| C | -0.88525200 | 4.57772100  | 0.50063800  |
| C | -2.24305600 | 4.33954000  | 0.54640800  |
| H | -0.39870300 | 5.53988500  | 0.53013700  |
| H | -3.25109600 | 2.45291000  | 0.37781900  |



|    |             |             |             |
|----|-------------|-------------|-------------|
| H  | -3.08612400 | 5.00953000  | 0.61478200  |
| C  | -0.30839700 | 3.29812900  | 0.39610700  |
| N  | -1.25737800 | 2.36447900  | 0.39215400  |
| N  | -0.63638000 | -2.64301900 | 0.38876000  |
| N  | 1.63133300  | -1.13510200 | 0.15559000  |
| C  | 4.16285300  | -2.27120500 | -0.01619600 |
| H  | 5.15143800  | -2.71440700 | -0.08848000 |
| N  | -2.40730600 | 3.00726900  | 0.48252100  |
| C  | 4.96191400  | 1.35623000  | -0.04504100 |
| H  | 5.81463600  | 2.02759400  | -0.08212600 |
| C  | 5.14222500  | 0.01249400  | -0.08930100 |
| H  | 6.13962300  | -0.40975200 | -0.16449200 |
| N  | -1.57399400 | -3.60436300 | 0.54544500  |
| N  | 0.39892500  | -4.54673000 | 0.43123000  |
| N  | -1.30420600 | -0.30644400 | 2.76654900  |
| O  | -1.44357000 | -0.40630000 | 3.95482300  |
| O  | -2.27352500 | -0.34663700 | 1.95716200  |
| O  | -0.15575400 | -0.14904300 | 2.23545500  |
| N  | -3.60781600 | -0.35912500 | -1.07057200 |
| O  | -3.16227400 | 0.70091000  | -0.51510100 |
| O  | -4.74405200 | -0.45069700 | -1.43821200 |
| O  | -2.75858900 | -1.27975600 | -1.19977500 |
| N  | -0.10332400 | -0.01981400 | -2.85962100 |
| O  | -0.67675100 | 0.94547100  | -2.26369400 |
| O  | 0.20388100  | 0.03588000  | -4.01845800 |
| O  | 0.13032200  | -1.04037100 | -2.14444800 |
| Eu | -0.89322400 | -0.11516500 | -0.07961900 |

EuR<sub>1</sub>PhR<sub>7</sub>(NO<sub>3</sub>)<sub>3</sub> (PBE0/6-311G\*-RECP)

|   |             |             |             |
|---|-------------|-------------|-------------|
| C | -2.68929600 | -0.51377300 | -0.11595400 |
| C | -1.63264800 | -2.54521700 | -0.25507200 |
| C | -2.85178700 | -3.24354400 | -0.26025300 |
| H | -2.84358400 | -4.32467300 | -0.32935900 |
| C | -2.59073700 | 0.92504600  | -0.10188600 |
| C | -3.77647700 | 1.69259300  | -0.09561900 |
| C | -3.63544100 | 3.09128100  | -0.13047500 |
| C | -2.38401000 | 3.64584800  | -0.17877500 |
| H | -4.52071900 | 3.72038600  | -0.12499100 |
| H | -2.25147000 | 4.72095200  | -0.21233000 |
| N | -1.36793700 | 1.47676900  | -0.12599700 |
| C | -3.96582600 | -1.11991300 | -0.11773400 |
| C | -0.35798900 | -3.24181100 | -0.37766800 |
| H | 1.52501000  | -5.59602500 | -0.63280300 |

|    |             |             |             |
|----|-------------|-------------|-------------|
| H  | 2.79319500  | -3.32817900 | -0.54839300 |
| C  | -1.25998500 | 2.79844900  | -0.17314500 |
| C  | 0.60221800  | 4.63781400  | -0.28101500 |
| C  | 1.97253900  | 4.48369900  | -0.23553400 |
| H  | 0.05984300  | 5.56699500  | -0.35768000 |
| H  | 3.08062300  | 2.65834300  | -0.00470700 |
| H  | 2.77570200  | 5.20393500  | -0.25869300 |
| C  | 0.09862700  | 3.32633900  | -0.20401800 |
| N  | 1.10041700  | 2.45337900  | -0.12504900 |
| N  | 0.81091200  | -2.55233200 | -0.41608000 |
| N  | -1.55127400 | -1.22690800 | -0.16107300 |
| C  | -4.01521800 | -2.52502200 | -0.17838100 |
| H  | -4.97767100 | -3.02807100 | -0.17440500 |
| N  | 2.21349900  | 3.16510100  | -0.14711500 |
| C  | -5.04723700 | 1.04458700  | -0.06793700 |
| H  | -5.94292100 | 1.65824900  | -0.04787200 |
| C  | -5.13912000 | -0.30878900 | -0.07701700 |
| H  | -6.10874800 | -0.79712100 | -0.06421600 |
| N  | -0.21516500 | -4.54809400 | -0.46615300 |
| C  | 1.72648000  | -3.48884800 | -0.52321900 |
| N  | 1.11512300  | -4.67981700 | -0.55940100 |
| N  | 0.03654800  | -0.29822800 | 2.88633300  |
| O  | -0.33138100 | -0.39695200 | 4.02442000  |
| O  | 0.33641000  | -1.31104600 | 2.18076200  |
| O  | 0.14767100  | 0.82541000  | 2.30489400  |
| N  | 3.71307500  | -0.23602500 | 0.78236100  |
| O  | 3.00777900  | -1.26286200 | 0.59453000  |
| O  | 3.05565900  | 0.85463300  | 0.82694000  |
| O  | 4.90308600  | -0.27040300 | 0.91370200  |
| N  | 1.35696200  | 0.10008400  | -2.72352100 |
| O  | 1.54822800  | 0.16389100  | -3.90741800 |
| O  | 0.18743900  | 0.02806100  | -2.23137000 |
| O  | 2.30519700  | 0.09873500  | -1.88194600 |
| Eu | 0.86222800  | -0.06064200 | 0.12367300  |

EuR<sub>1</sub>PhR<sub>8</sub>(NO<sub>3</sub>)<sub>3</sub> (PBE0/6-311G\*-RECP)

|   |            |             |             |
|---|------------|-------------|-------------|
| C | 2.70021000 | -0.39067200 | -0.12435800 |
| C | 1.73069600 | -2.46746800 | -0.28513500 |
| C | 2.98209800 | -3.10651300 | -0.28989200 |
| H | 3.05861000 | -4.18526600 | -0.37189400 |
| C | 2.53571800 | 1.04377900  | -0.10365400 |
| C | 3.68695100 | 1.86114400  | -0.09300000 |
| C | 3.48514800 | 3.25292500  | -0.12043900 |

|    |             |             |             |
|----|-------------|-------------|-------------|
| C  | 2.21046300  | 3.75155200  | -0.15962000 |
| H  | 4.34178900  | 3.92039000  | -0.11335800 |
| H  | 2.03079500  | 4.82007100  | -0.18276400 |
| N  | 1.29061000  | 1.53979800  | -0.12353700 |
| C  | 4.00470300  | -0.93872300 | -0.12656000 |
| C  | 0.47468600  | -3.18906200 | -0.44008400 |
| H  | 0.95554200  | -5.26488500 | -0.48974300 |
| H  | -2.64196100 | -3.46807700 | -0.75391700 |
| C  | 1.12348800  | 2.85591700  | -0.15485100 |
| C  | -0.81886800 | 4.61498200  | -0.21469800 |
| C  | -2.17924100 | 4.40058300  | -0.13141300 |
| H  | -0.32102800 | 5.56772600  | -0.30356400 |
| H  | -3.19821300 | 2.52565500  | 0.12317300  |
| H  | -3.01348800 | 5.08494800  | -0.12936400 |
| C  | -0.25654500 | 3.32600900  | -0.15706300 |
| N  | -1.21648300 | 2.41020000  | -0.05308100 |
| N  | -0.70227000 | -2.59475400 | -0.53481900 |
| N  | 1.59856000  | -1.15341300 | -0.17700600 |
| C  | 4.11401300  | -2.33781600 | -0.19532700 |
| H  | 5.09635100  | -2.80032600 | -0.19190700 |
| N  | -2.35895300 | 3.07179100  | -0.04092300 |
| C  | 4.98572900  | 1.26993000  | -0.06632800 |
| H  | 5.85257000  | 1.92354500  | -0.04235300 |
| C  | 5.14100900  | -0.07752000 | -0.07986100 |
| H  | 6.13181500  | -0.52100800 | -0.06712000 |
| N  | -1.01281500 | -4.80598300 | -0.68882000 |
| N  | 0.28725000  | -4.51480800 | -0.53752200 |
| C  | -1.57669800 | -3.61673000 | -0.67747200 |
| N  | 0.06536200  | -0.44413400 | 2.83621400  |
| O  | 0.49244900  | -0.58153900 | 3.94897000  |
| O  | -0.01269300 | 0.69347700  | 2.27564900  |
| O  | -0.33100200 | -1.42509700 | 2.13448800  |
| N  | -1.39865200 | 0.20176500  | -2.69462500 |
| O  | -1.59383900 | 0.34165700  | -3.87004000 |
| O  | -2.34029300 | 0.12398200  | -1.85117400 |
| O  | -0.22434300 | 0.12296500  | -2.20982300 |
| N  | -3.68482300 | -0.40832400 | 0.84193300  |
| O  | -4.86466200 | -0.51840700 | 1.01080300  |
| O  | -3.08062300 | 0.70832600  | 0.95821800  |
| O  | -2.93745100 | -1.37914000 | 0.53933500  |
| Eu | -0.87760300 | -0.10986400 | 0.12309900  |

EuR<sub>2</sub>PhR<sub>2</sub>(NO<sub>3</sub>)<sub>3</sub> (PBE0/6-311G\*-RECP)

|   |             |             |             |
|---|-------------|-------------|-------------|
| C | 2.60817400  | -0.73652800 | 0.02295300  |
| C | 1.40206200  | -2.69917400 | -0.05196000 |
| C | 2.58301400  | -3.47035500 | -0.02957600 |
| H | 2.52570300  | -4.55210500 | -0.07098500 |
| C | 2.61873200  | 0.70718200  | 0.00986800  |
| C | 3.86105500  | 1.38075800  | 0.01839300  |
| C | 3.83220100  | 2.78836900  | 0.01562100  |
| C | 2.63256000  | 3.44204700  | 0.03752500  |
| H | 4.76638300  | 3.34253500  | 0.01270300  |
| H | 2.59015300  | 4.52498600  | 0.06324000  |
| N | 1.44210200  | 1.36130700  | -0.00105800 |
| C | 3.84055400  | -1.42788800 | 0.03318800  |
| C | 0.09684800  | -3.32053500 | -0.19658300 |
| C | -0.27237800 | -4.64305600 | -0.18908900 |
| H | 0.28105800  | -5.55722100 | -0.04742100 |
| H | -2.21684900 | -5.44863600 | -0.44387400 |
| H | -3.04617100 | -3.04346000 | -0.68994700 |
| C | 1.44063100  | 2.68792100  | 0.04355700  |
| C | -0.21355800 | 4.65398700  | 0.15520700  |
| H | 0.35513500  | 5.56443600  | 0.05637300  |
| H | -3.01730500 | 3.07822500  | 0.55642700  |
| H | -2.15464400 | 5.47788300  | 0.37453500  |
| C | 0.13977200  | 3.32685100  | 0.14604100  |
| N | -0.98106300 | 2.55584300  | 0.30703000  |
| N | -1.00893800 | -2.53951300 | -0.40935700 |
| N | 1.42205500  | -1.37347500 | 0.00954200  |
| C | 3.79128300  | -2.83488500 | 0.02518600  |
| H | 4.71707900  | -3.40271300 | 0.04162100  |
| N | -0.57604600 | -0.50934400 | 2.83065100  |
| N | -0.57229600 | 0.52520000  | -2.85303600 |
| N | -3.80307900 | 0.01001000  | 0.08974700  |
| O | 0.06192600  | -0.40494800 | -2.27018700 |
| O | -0.46555700 | 0.73812000  | -4.03024900 |
| O | -1.32156600 | 1.22319200  | -2.10342800 |
| O | -1.14214200 | -1.32709000 | 2.03970100  |
| O | -0.11241500 | 0.53607600  | 2.28726200  |
| O | -0.48143000 | -0.72085400 | 4.00928700  |
| O | -3.10242300 | 0.79194700  | 0.79868800  |
| O | -3.14569300 | -0.77299100 | -0.65930800 |
| O | -5.00344900 | 0.01034100  | 0.12324100  |
| C | -2.02542300 | -3.35188600 | -0.52431300 |
| C | -1.99063000 | 3.37731700  | 0.41194000  |
| N | -1.62223700 | -4.63866500 | -0.39917700 |

|    |             |             |             |
|----|-------------|-------------|-------------|
| N  | -1.56913800 | 4.66157900  | 0.32467900  |
| C  | 5.07134700  | -0.71057800 | 0.04242400  |
| H  | 6.00089500  | -1.27190700 | 0.05299600  |
| C  | 5.08130300  | 0.64571700  | 0.03352900  |
| H  | 6.01895300  | 1.19345700  | 0.03913600  |
| Eu | -0.87655900 | 0.00384100  | -0.01303900 |

EuR<sub>2</sub>PhR<sub>3</sub>(NO<sub>3</sub>)<sub>3</sub> (PBE0/6-311G\*-RECP)

|   |             |             |             |
|---|-------------|-------------|-------------|
| C | -2.60939100 | -0.83994300 | -0.12489200 |
| C | -1.32551000 | -2.74185700 | -0.26533500 |
| C | -2.47432400 | -3.56080500 | -0.24760300 |
| H | -2.37403300 | -4.63891400 | -0.30339800 |
| C | -2.67046400 | 0.60235600  | -0.12561900 |
| C | -3.93295700 | 1.23907700  | -0.10098600 |
| C | -3.94091300 | 2.64439300  | -0.15085200 |
| C | -2.75810900 | 3.32924800  | -0.24307200 |
| H | -4.88692700 | 3.17718900  | -0.12590800 |
| H | -2.76074500 | 4.41294900  | -0.29186800 |
| N | -1.51699600 | 1.28155800  | -0.18578200 |
| C | -3.81396900 | -1.57496400 | -0.10119000 |
| C | 0.01204100  | -3.29690900 | -0.38699800 |
| C | 0.44239400  | -4.59310100 | -0.52623200 |
| H | -0.07710100 | -5.53631600 | -0.57658500 |
| H | 2.43967600  | -5.28641000 | -0.69918300 |
| H | 3.17400800  | -2.84907000 | -0.49694300 |
| C | -1.55030600 | 2.60423100  | -0.26333500 |
| H | -0.68186900 | 5.30500500  | -0.56826000 |
| H | 2.91942900  | 3.16376400  | -0.49960200 |
| H | 1.80663900  | 5.70176400  | -0.73147200 |
| C | -0.24980600 | 3.23988800  | -0.38225300 |
| N | 0.88422400  | 2.56574100  | -0.37271300 |
| N | 1.09564400  | -2.45654100 | -0.37949000 |
| N | -1.40023800 | -1.42052400 | -0.18374500 |
| C | -3.70806200 | -2.97800900 | -0.15363900 |
| H | -4.60811600 | -3.58550000 | -0.13061000 |
| C | 2.15709200  | -3.20892300 | -0.50440600 |
| C | 1.88707900  | 3.47402300  | -0.51039100 |
| N | 1.80524300  | -4.51185300 | -0.60136400 |
| C | -5.06699500 | -0.89621600 | -0.04346700 |
| H | -5.97734900 | -1.48738600 | -0.00975700 |
| C | -5.12549200 | 0.45980400  | -0.04321100 |
| H | -6.08233500 | 0.97197900  | -0.00912300 |
| N | -0.00250700 | 4.56536700  | -0.52807100 |
| C | 1.35359000  | 4.73074200  | -0.61279400 |

|    |             |             |             |
|----|-------------|-------------|-------------|
| N  | -0.08828400 | -0.01736400 | 2.86435600  |
| O  | -0.52428900 | -0.04476700 | 3.98254100  |
| O  | 0.22830400  | -1.07201600 | 2.23364100  |
| O  | 0.08150100  | 1.06928200  | 2.22974400  |
| N  | 3.63904500  | 0.15721700  | 1.08712500  |
| O  | 4.80226800  | 0.20727900  | 1.37683700  |
| O  | 3.02904900  | -0.93996800 | 0.90634900  |
| O  | 2.92639700  | 1.19322200  | 0.93901900  |
| N  | 1.48556400  | 0.05133300  | -2.67658800 |
| O  | 1.72358900  | 0.04146500  | -3.85503500 |
| O  | 2.40193900  | 0.06817700  | -1.80064800 |
| O  | 0.29787700  | 0.04279200  | -2.22845800 |
| Eu | 0.89378400  | 0.04483300  | 0.15432300  |

EuR<sub>2</sub>PhR<sub>4</sub>(NO<sub>3</sub>)<sub>3</sub> (PBE0/6-311G\*-RECP)

|   |             |             |             |
|---|-------------|-------------|-------------|
| C | 2.41469200  | 1.12958400  | -0.01203800 |
| C | 0.90634200  | 2.87095000  | 0.08975400  |
| C | 1.94817500  | 3.82175500  | 0.06186700  |
| H | 1.71906000  | 4.88030300  | 0.10861000  |
| C | 2.65583600  | -0.29489200 | -0.01157100 |
| C | 3.98889800  | -0.76347300 | -0.05201700 |
| C | 4.18279900  | -2.15663900 | -0.07097900 |
| C | 3.09999900  | -2.99308100 | -0.07884200 |
| H | 5.19231000  | -2.55618900 | -0.09771200 |
| H | 3.22947100  | -4.06844700 | -0.12612600 |
| N | 1.59936800  | -1.12776700 | 0.01856600  |
| C | 3.51941100  | 2.00896000  | -0.03253700 |
| C | -0.48287500 | 3.26740600  | 0.25061300  |
| C | -1.06285600 | 4.51085600  | 0.30978600  |
| H | -0.66600100 | 5.50914200  | 0.21999600  |
| H | -3.10923800 | 4.97782800  | 0.60716400  |
| H | -3.53519100 | 2.45841800  | 0.74189600  |
| C | 1.80714600  | -2.43535000 | -0.04310100 |
| C | 0.45703600  | -4.64116600 | -0.04664600 |
| H | 1.13417300  | -5.46617800 | 0.10086800  |
| H | -1.40611300 | -5.65777200 | -0.19770200 |
| C | 0.62167500  | -3.27767700 | -0.11750900 |
| N | -0.60892500 | -2.73059100 | -0.30636800 |
| N | -1.44787800 | 2.30944600  | 0.42305600  |
| N | 1.14354800  | 1.56683800  | 0.01941600  |
| C | 3.24291700  | 3.38965800  | -0.01118100 |
| H | 4.06399100  | 4.10026100  | -0.03491000 |

|    |             |             |             |
|----|-------------|-------------|-------------|
| C  | -2.58118500 | 2.93743000  | 0.58083600  |
| N  | -2.39259600 | 4.27754900  | 0.51905800  |
| N  | -0.87126600 | -4.80463500 | -0.19452600 |
| C  | 4.84851900  | 1.49542200  | -0.06836800 |
| H  | 5.67688000  | 2.19739000  | -0.08673200 |
| C  | 5.07595300  | 0.15829700  | -0.07779900 |
| H  | 6.08889800  | -0.23172900 | -0.10651200 |
| N  | -1.50665000 | -3.64890800 | -0.35035400 |
| N  | -0.38469400 | -0.63478600 | 2.83795300  |
| O  | -0.18976000 | -0.84792700 | 4.00457200  |
| O  | -0.12537000 | 0.47906000  | 2.29710100  |
| O  | -0.85719900 | -1.51964600 | 2.05934200  |
| N  | -3.73603700 | -0.52839600 | -0.24391400 |
| O  | -4.92469000 | -0.63346100 | -0.36869200 |
| O  | -3.21565400 | 0.10601700  | 0.73401300  |
| O  | -2.91399100 | -1.02290100 | -1.06379300 |
| N  | -0.47648100 | 0.44127600  | -2.80981500 |
| O  | -0.33145300 | 0.66982100  | -3.98022200 |
| O  | -1.12998000 | 1.21299900  | -2.04423500 |
| O  | 0.02316500  | -0.58075200 | -2.25094900 |
| Eu | -0.89130800 | -0.14376400 | 0.00573000  |

EuR<sub>2</sub>PhR<sub>5</sub>(NO<sub>3</sub>)<sub>3</sub> (PBE0/6-311G\*-RECP)

|   |             |             |             |
|---|-------------|-------------|-------------|
| C | -2.66287500 | 0.67640100  | -0.08375300 |
| C | -1.49116800 | 2.65675900  | -0.16769700 |
| C | -2.68458400 | 3.40692600  | -0.13419500 |
| H | -2.64703600 | 4.48998400  | -0.16280600 |
| C | -2.64474500 | -0.76719200 | -0.11833500 |
| C | -3.87148700 | -1.47027200 | -0.13400100 |
| C | -3.80922700 | -2.87228600 | -0.22410100 |
| C | -2.59179000 | -3.49456500 | -0.30459200 |
| H | -4.72875700 | -3.44990800 | -0.23862100 |
| H | -2.51987100 | -4.57292300 | -0.38854400 |
| N | -1.45520700 | -1.38811000 | -0.16378300 |
| C | -3.90713200 | 1.34314000  | -0.05391900 |
| C | -0.19025700 | 3.29588500  | -0.28104800 |
| C | 0.15988000  | 4.61979400  | -0.37439800 |
| H | -0.41575000 | 5.53114300  | -0.37719000 |
| H | 2.10803900  | 5.43989800  | -0.55185900 |
| H | 2.99213000  | 3.04649700  | -0.46446100 |
| C | -1.42444700 | -2.71028200 | -0.26933100 |
| C | 0.37070300  | -4.63293300 | -0.40371100 |
| H | -0.15929000 | -5.57147800 | -0.45208700 |
| H | 2.92438800  | -2.96043400 | -0.21069600 |

|    |             |             |             |
|----|-------------|-------------|-------------|
| C  | -0.10031200 | -3.31317200 | -0.33704600 |
| N  | 0.96808200  | -2.52027800 | -0.29603200 |
| N  | 0.94279800  | 2.52392900  | -0.32587400 |
| N  | -1.48865200 | 1.33073200  | -0.11801200 |
| C  | -3.88227800 | 2.75058400  | -0.06559500 |
| H  | -4.81649400 | 3.30361200  | -0.03441300 |
| C  | 1.95541500  | 3.34385400  | -0.43729000 |
| N  | 1.52356600  | 4.62463700  | -0.47448300 |
| C  | -5.12219900 | 0.59692800  | -0.03253600 |
| H  | -6.06338000 | 1.13721800  | 0.00518900  |
| C  | -5.10588000 | -0.75879800 | -0.07398300 |
| H  | -6.03299700 | -1.32395600 | -0.07077900 |
| N  | 1.98891600  | -3.33343900 | -0.33162400 |
| N  | 1.70032700  | -4.60853300 | -0.39154600 |
| N  | 1.34143700  | 0.07188200  | -2.71976500 |
| O  | 1.52782300  | 0.13497700  | -3.90393700 |
| O  | 2.29194500  | 0.08877400  | -1.88003900 |
| O  | 0.17558000  | -0.01423100 | -2.22161800 |
| N  | 0.07782500  | 0.00925500  | 2.89084800  |
| O  | -0.27132900 | 0.00117500  | 4.03724600  |
| O  | 0.26652600  | 1.08615800  | 2.24446700  |
| O  | 0.28077700  | -1.06000900 | 2.23419500  |
| N  | 3.71032700  | -0.04715900 | 0.81383700  |
| O  | 3.01885500  | -1.10496700 | 0.67763800  |
| O  | 4.89987600  | -0.07083100 | 0.95440900  |
| O  | 3.04115700  | 1.02517000  | 0.79274400  |
| Eu | 0.86282000  | 0.02500900  | 0.13101000  |

EuR<sub>2</sub>PhR<sub>6</sub>(NO<sub>3</sub>)<sub>3</sub> (PBE0/6-311G\*-RECP)

|   |             |             |             |
|---|-------------|-------------|-------------|
| C | -2.68648800 | 0.37846800  | -0.08738100 |
| C | -1.77942000 | 2.48301400  | -0.17605900 |
| C | -3.04486900 | 3.08841300  | -0.07730900 |
| H | -3.15182100 | 4.16796600  | -0.06435000 |
| C | -2.48065300 | -1.05015000 | -0.12176600 |
| C | -3.60436000 | -1.90188300 | -0.08262200 |
| C | -3.36163100 | -3.28580900 | -0.17774100 |
| C | -2.08074700 | -3.74126200 | -0.33226600 |
| H | -4.19580700 | -3.98051600 | -0.14409400 |
| H | -1.87836300 | -4.80172700 | -0.43137000 |
| N | -1.22240400 | -1.50803000 | -0.22544600 |
| C | -4.00314500 | 0.88687300  | 0.00893200  |
| C | -0.54036700 | 3.24302600  | -0.27810100 |
| H | -1.10731600 | 5.28818100  | -0.45343200 |
| H | 1.41538600  | 5.75565100  | -0.58037500 |



|    |             |             |             |
|----|-------------|-------------|-------------|
| C  | -1.01882700 | -2.81302300 | -0.35893600 |
| C  | 0.92745600  | -4.46128200 | -0.71793600 |
| H  | 0.51726400  | -5.45811100 | -0.72510300 |
| H  | 3.44241000  | -2.42071500 | -0.86251400 |
| H  | 2.97667300  | -4.92752700 | -1.00333900 |
| C  | 0.36160700  | -3.22050200 | -0.56024500 |
| N  | 1.34262300  | -2.26384400 | -0.62637600 |
| N  | 0.64942400  | 2.68803100  | -0.26715400 |
| N  | -1.61300300 | 1.17187500  | -0.17575100 |
| C  | -4.15204400 | 2.28426300  | 0.01801100  |
| H  | -5.14413600 | 2.71796200  | 0.09991600  |
| C  | 2.47332000  | -2.89237100 | -0.80919800 |
| N  | 2.26509900  | -4.22770200 | -0.87661200 |
| C  | -5.10991800 | -0.00984700 | 0.08301900  |
| H  | -6.11096100 | 0.40164700  | 0.16906500  |
| C  | -4.91586500 | -1.35209300 | 0.03618600  |
| H  | -5.76131500 | -2.03212600 | 0.08232800  |
| N  | 1.59078500  | 3.65111000  | -0.38954900 |
| C  | 0.95617900  | 4.78509400  | -0.47234600 |
| N  | -0.38918900 | 4.58603300  | -0.40437500 |
| N  | -0.02739600 | -0.43286000 | 2.78606100  |
| O  | 0.73294300  | -1.21529500 | 2.13844600  |
| O  | -0.39401000 | 0.61110700  | 2.16645100  |
| O  | -0.38684400 | -0.67144900 | 3.90749000  |
| N  | 3.46058900  | 0.41023200  | 1.37489700  |
| O  | 4.52741400  | 0.51210300  | 1.91295200  |
| O  | 2.53026500  | 1.25323000  | 1.53027200  |
| O  | 3.18235300  | -0.56212700 | 0.60409800  |
| N  | 1.38347500  | 0.48135500  | -2.73942800 |
| O  | 1.55563000  | 0.61773400  | -3.92179000 |
| O  | 2.33271600  | 0.48206400  | -1.90655500 |
| O  | 0.22030800  | 0.32267500  | -2.24562700 |
| Eu | 0.90270500  | 0.12809500  | 0.09314400  |

EuR<sub>2</sub>PhR<sub>7</sub>(NO<sub>3</sub>)<sub>3</sub> (PBE0/6-311G\*-RECP)

|   |            |             |             |
|---|------------|-------------|-------------|
| C | 2.62358500 | 0.81627500  | -0.10270100 |
| C | 1.35922400 | 2.73476200  | -0.21027200 |
| C | 2.51563200 | 3.54186500  | -0.18276200 |
| H | 2.42607000 | 4.62162900  | -0.22132100 |
| C | 2.67308800 | -0.62545800 | -0.12270800 |
| C | 3.92827800 | -1.27556000 | -0.11336300 |
| C | 3.92924500 | -2.68148300 | -0.18511400 |
| C | 2.74234600 | -3.35830300 | -0.27980200 |
| H | 4.87367600 | -3.21767400 | -0.17602300 |

|    |             |             |             |
|----|-------------|-------------|-------------|
| H  | 2.69684200  | -4.43829300 | -0.35291000 |
| N  | 1.51229100  | -1.29794300 | -0.18351300 |
| C  | 3.83497900  | 1.54044400  | -0.07179600 |
| C  | 0.02771200  | 3.30836200  | -0.31832000 |
| C  | -0.38670900 | 4.61200600  | -0.43175000 |
| H  | 0.14479800  | 5.54919000  | -0.46606400 |
| H  | -2.37536700 | 5.33442300  | -0.58548200 |
| H  | -3.14103500 | 2.90370300  | -0.42742400 |
| C  | 1.54785200  | -2.61715200 | -0.27772200 |
| H  | -2.90568500 | -3.24634600 | -0.48567900 |
| H  | -1.71815700 | -5.55685700 | -0.62604600 |
| C  | 0.24836900  | -3.26983400 | -0.38942100 |
| N  | -0.89618400 | -2.54128900 | -0.39292300 |
| N  | -1.06716600 | 2.48227000  | -0.32320200 |
| N  | 1.41951400  | 1.41131000  | -0.15030700 |
| C  | 3.74346800  | 2.94481300  | -0.10219000 |
| H  | 4.64995900  | 3.54237900  | -0.07287700 |
| C  | -2.11959300 | 3.25065400  | -0.43048400 |
| C  | -1.84498100 | -3.44454100 | -0.48917300 |
| N  | -1.75094700 | 4.54988200  | -0.50386200 |
| N  | -1.27592600 | -4.65593800 | -0.55229900 |
| C  | 5.08169900  | 0.84950400  | -0.02888200 |
| H  | 5.99746600  | 1.43198200  | 0.00994300  |
| C  | 5.12776100  | -0.50655200 | -0.04947400 |
| H  | 6.07999300  | -1.02783300 | -0.02753900 |
| N  | 0.06024100  | -4.57035800 | -0.48776400 |
| N  | -1.44202300 | 0.01746900  | -2.69929100 |
| O  | -1.66487900 | 0.05133700  | -3.87987600 |
| O  | -0.26054600 | 0.00786600  | -2.23500700 |
| O  | -2.36989500 | -0.01089100 | -1.83526900 |
| N  | -3.67066900 | -0.16186000 | 0.97898800  |
| O  | -4.84623600 | -0.20869700 | 1.21502400  |
| O  | -2.96966100 | -1.20023700 | 0.79483300  |
| O  | -3.03525800 | 0.93195200  | 0.89553700  |
| N  | 0.00284600  | -0.08078500 | 2.87509400  |
| O  | -0.21088200 | -1.14097400 | 2.20891900  |
| O  | -0.21948500 | 1.00479800  | 2.25521300  |
| O  | 0.39204900  | -0.10385400 | 4.00943900  |
| Eu | -0.88390200 | -0.02436200 | 0.13952500  |

EuR<sub>2</sub>PhR<sub>8</sub>(NO<sub>3</sub>)<sub>3</sub> (PBE0/6-311G\*-RECP)

|   |             |            |            |
|---|-------------|------------|------------|
| C | -2.57889900 | 0.95970800 | 0.09676500 |
|---|-------------|------------|------------|

|   |             |             |             |
|---|-------------|-------------|-------------|
| C | -1.22596600 | 2.81546200  | 0.13461800  |
| C | -2.34265400 | 3.67675300  | 0.09123700  |
| H | -2.20091200 | 4.75163100  | 0.08661200  |
| C | -2.69782900 | -0.47900900 | 0.13214300  |
| C | -3.98548600 | -1.06727300 | 0.12640600  |
| C | -4.05277100 | -2.46872300 | 0.20322300  |
| C | -2.89820100 | -3.20132600 | 0.30156300  |
| H | -5.02053300 | -2.96109800 | 0.19678200  |
| H | -2.94132900 | -4.28215000 | 0.38120100  |
| N | -1.57330100 | -1.20643400 | 0.19343500  |
| C | -3.75525300 | 1.73831900  | 0.05035400  |
| C | 0.13476300  | 3.32373300  | 0.17694500  |
| C | 0.62083700  | 4.60559600  | 0.24659000  |
| H | 0.14086800  | 5.56958700  | 0.29459100  |
| H | 2.64961200  | 5.22444600  | 0.28913700  |
| H | 3.27968800  | 2.75512200  | 0.13963900  |
| C | -1.66681600 | -2.52321100 | 0.29687200  |
| H | -0.82654300 | -5.29636100 | 0.52113600  |
| H | 2.73889800  | -3.42211500 | 0.65564800  |
| C | -0.39050500 | -3.21193500 | 0.43184100  |
| N | 0.77557000  | -2.59270800 | 0.48501500  |
| N | 1.18429400  | 2.44170800  | 0.14085600  |
| N | -1.34966300 | 1.49579200  | 0.13249000  |
| C | -3.59838000 | 3.13733000  | 0.04457900  |
| H | -4.47590700 | 3.77599200  | 0.00497000  |
| C | 2.27902200  | 3.15544200  | 0.18283700  |
| C | 1.67541300  | -3.59489900 | 0.61348900  |
| N | 1.98182800  | 4.47289000  | 0.25077100  |
| C | -5.03422900 | 1.10758200  | 0.01978900  |
| H | -5.92057500 | 1.73332500  | -0.02741500 |
| C | -5.14759000 | -0.24387100 | 0.05698500  |
| H | -6.12377400 | -0.71868300 | 0.04092800  |
| N | 1.13723300  | -4.79532800 | 0.65458400  |
| N | -0.17258600 | -4.53263000 | 0.53791300  |
| N | 3.68354700  | -0.36515000 | -0.94094200 |
| O | 3.00073700  | -1.33180200 | -0.49291300 |
| O | 3.04053200  | 0.72156300  | -1.08296800 |
| O | 4.84753900  | -0.46414900 | -1.21036300 |
| N | 1.39775700  | 0.22314900  | 2.71626500  |
| O | 1.57912800  | 0.39118300  | 3.89064600  |
| O | 0.24175600  | -0.00176500 | 2.23575600  |
| O | 2.33961100  | 0.26031300  | 1.86969300  |
| N | -0.04767300 | -0.34716900 | -2.82178200 |
| O | -0.47199600 | -0.46313100 | -3.93900900 |

|    |            |             |             |
|----|------------|-------------|-------------|
| O  | 0.32259100 | -1.34723300 | -2.13057600 |
| O  | 0.05298200 | 0.77905400  | -2.24740700 |
| Eu | 0.91977300 | -0.08601400 | -0.10164700 |

EuR<sub>3</sub>PhR<sub>3</sub>(NO<sub>3</sub>)<sub>3</sub> (PBE0/6-311G\*-RECP)

|   |             |             |             |
|---|-------------|-------------|-------------|
| C | 2.56729000  | -0.72221900 | 0.00863500  |
| C | 1.36652900  | -2.68495700 | -0.04382400 |
| C | 2.54775000  | -3.45385400 | -0.04336200 |
| H | 2.50785500  | -4.53680600 | -0.08917700 |
| C | 2.56710300  | 0.72286700  | -0.00874300 |
| C | 3.80323200  | 1.40806100  | -0.00345000 |
| C | 3.75633600  | 2.81389500  | 0.00567900  |
| C | 2.54686700  | 3.45449900  | 0.04319500  |
| H | 4.68217600  | 3.38148400  | 0.00393900  |
| H | 2.50669500  | 4.53744200  | 0.08897400  |
| N | 1.38707800  | 1.35972500  | -0.01708200 |
| C | 3.80359600  | -1.40709300 | 0.00317700  |
| C | 0.04671900  | -3.27427400 | -0.17546600 |
| H | 0.37555300  | -5.36259800 | -0.01710700 |
| H | -2.09783900 | -5.67274100 | -0.41009200 |
| H | -3.07760000 | -3.08077200 | -0.67614400 |
| C | 1.36584700  | 2.68529500  | 0.04383500  |
| H | 0.37409000  | 5.36265600  | 0.01659500  |
| H | -3.07830200 | 3.07996500  | 0.67664600  |
| H | -2.09926600 | 5.67219100  | 0.41030800  |
| C | 0.04589300  | 3.27427600  | 0.17553200  |
| N | -1.04325400 | 2.55846900  | 0.37437700  |
| N | -1.04263500 | -2.55874200 | -0.37416900 |
| N | 1.38743100  | -1.35938300 | 0.01711900  |
| C | 3.75705800  | -2.81294000 | -0.00596800 |
| H | 4.68304300  | -3.38029200 | -0.00435700 |
| N | -0.44344800 | -0.53215600 | 2.82408900  |
| N | -0.44413500 | 0.53201600  | -2.82405600 |
| N | -3.82174800 | -0.00042700 | -0.00006400 |
| O | -0.00938000 | -0.51425900 | -2.25821700 |
| O | -0.25788300 | 0.76022700  | -3.98879000 |
| O | -1.07998100 | 1.33184200  | -2.07058200 |
| O | -1.07945500 | -1.33201100 | 2.07078000  |
| O | -0.00899300 | 0.51420000  | 2.25816800  |
| O | -0.25698300 | -0.76030500 | 3.98880100  |
| O | -3.14089300 | 0.69853900  | 0.81141800  |
| O | -3.14068400 | -0.69933700 | -0.81141200 |
| O | -5.02087800 | -0.00061800 | -0.00005000 |
| C | -2.07350500 | -3.43319400 | -0.49985400 |

|    |             |             |             |
|----|-------------|-------------|-------------|
| C  | -2.07433800 | 3.43265500  | 0.50015600  |
| C  | -1.60422400 | -4.71492600 | -0.37507400 |
| C  | -1.60540800 | 4.71450300  | 0.37525000  |
| N  | -0.25731900 | -4.59742200 | -0.17311800 |
| N  | -0.25853100 | 4.59733300  | 0.17290500  |
| C  | 5.02893800  | -0.67773800 | 0.00114800  |
| C  | 5.02876300  | 0.67902200  | -0.00157100 |
| H  | 5.96372500  | -1.23017000 | 0.00042500  |
| H  | 5.96340700  | 1.23169600  | -0.00097000 |
| Eu | -0.92433700 | -0.00011800 | 0.00006700  |

EuR<sub>3</sub>PhR<sub>4</sub>(NO<sub>3</sub>)<sub>3</sub> (PBE0/6-311G\*-RECP)

|   |             |             |             |
|---|-------------|-------------|-------------|
| C | -2.46505900 | 0.98969900  | -0.01424000 |
| C | -1.04945400 | 2.80753200  | 0.04692200  |
| C | -2.13781300 | 3.70293300  | 0.02676900  |
| H | -1.97895700 | 4.77533500  | 0.06048700  |
| C | -2.62610900 | -0.44692200 | -0.00433900 |
| C | -3.93059600 | -0.98764600 | -0.03018500 |
| C | -4.04392000 | -2.38991800 | -0.03937800 |
| C | -2.91441500 | -3.16245800 | -0.04816900 |
| H | -5.02841600 | -2.84806600 | -0.05524100 |
| H | -2.98458800 | -4.24374900 | -0.08302300 |
| N | -1.52323300 | -1.21549200 | 0.02206200  |
| C | -3.61636700 | 1.80958000  | -0.03104400 |
| C | 0.32820500  | 3.24964500  | 0.17455800  |
| H | 0.21749600  | 5.36617200  | 0.09663100  |
| H | 2.71309800  | 5.40477700  | 0.45853400  |
| H | 3.42119500  | 2.71838500  | 0.63609400  |
| C | -1.65326500 | -2.53395000 | -0.02522300 |
| H | -0.83729300 | -5.52674000 | 0.07021700  |
| H | 1.71306400  | -5.59550700 | -0.18037700 |
| C | -0.42365300 | -3.31187500 | -0.09178800 |
| N | 0.78456000  | -2.70559200 | -0.24529700 |
| N | 1.34091100  | 2.42069100  | 0.33438900  |
| N | -1.22201800 | 1.49227700  | -0.00094200 |
| C | -3.41089100 | 3.20115100  | -0.02260400 |
| H | -4.26689500 | 3.86921500  | -0.04031400 |
| C | 2.45771000  | 3.17744000  | 0.47654600  |
| C | 2.12278100  | 4.50468600  | 0.39814500  |
| N | 0.76938300  | 4.53370300  | 0.20928000  |
| C | -4.91550300 | 1.22258200  | -0.05106100 |
| C | -5.06680600 | -0.12554300 | -0.05117400 |
| H | -5.78245100 | 1.87622000  | -0.06588000 |
| H | -6.05706000 | -0.57055900 | -0.06840700 |

|    |             |             |             |
|----|-------------|-------------|-------------|
| N  | 1.72361700  | -3.58007400 | -0.29002400 |
| C  | -0.19681400 | -4.66794000 | -0.04474100 |
| N  | 1.13961500  | -4.76785200 | -0.16956300 |
| N  | 0.43212700  | 0.32943000  | -2.82290500 |
| O  | 0.26520500  | 0.51122900  | -3.99788800 |
| O  | 0.92528900  | 1.22023800  | -2.06321700 |
| O  | 0.12028300  | -0.75381900 | -2.24888400 |
| N  | 3.77776000  | -0.31941200 | -0.16576100 |
| O  | 3.19817600  | 0.20578800  | 0.84071400  |
| O  | 3.00712800  | -0.76793000 | -1.06381400 |
| O  | 4.97348400  | -0.37418700 | -0.25308700 |
| N  | 0.39157200  | -0.49448100 | 2.84394900  |
| O  | 0.19428800  | -0.68789800 | 4.01264200  |
| O  | 0.22696300  | 0.63310700  | 2.29956900  |
| O  | 0.77389400  | -1.42177100 | 2.06159700  |
| Eu | 0.91023600  | -0.09253800 | 0.00714200  |

EuR<sub>3</sub>PhR<sub>5</sub>(NO<sub>3</sub>)<sub>3</sub> (PBE0/6-311G\*-RECP)

|   |             |             |             |
|---|-------------|-------------|-------------|
| C | 2.68353800  | 0.54447500  | -0.08689500 |
| C | 1.60039100  | 2.57109400  | -0.17994300 |
| C | 2.82162300  | 3.27188500  | -0.15064000 |
| H | 2.84547100  | 4.35581300  | -0.18303900 |
| C | 2.59966200  | -0.89754200 | -0.11327300 |
| C | 3.79300400  | -1.65395900 | -0.12287700 |
| C | 3.66631100  | -3.05228100 | -0.20381700 |
| C | 2.42091100  | -3.61759500 | -0.28212900 |
| H | 4.55773700  | -3.67241800 | -0.21294500 |
| H | 2.29957400  | -4.69211500 | -0.35844100 |
| N | 1.38322800  | -1.46029500 | -0.15778700 |
| C | 3.95719900  | 1.15762500  | -0.06005500 |
| C | 0.31404200  | 3.23574400  | -0.29713300 |
| H | 0.78638200  | 5.29856700  | -0.37540500 |
| H | -1.68761000 | 5.74958700  | -0.59070900 |
| H | -2.85333100 | 3.22682600  | -0.50477400 |
| C | 1.29041000  | -2.78005900 | -0.25473300 |
| H | -0.11819000 | -5.57601900 | -0.42926200 |
| H | -3.06427800 | -2.80917300 | -0.20205800 |
| C | -0.06161000 | -3.31710100 | -0.32160900 |
| N | -1.08847700 | -2.47026900 | -0.28501500 |
| N | -0.83303000 | 2.58417200  | -0.34762600 |
| N | 1.54227500  | 1.24699000  | -0.12440900 |
| C | 3.99163000  | 2.56298200  | -0.07899200 |
| H | 4.94768500  | 3.07715000  | -0.05053500 |
| C | -1.81544400 | 3.51668500  | -0.47159600 |

|    |             |             |             |
|----|-------------|-------------|-------------|
| C  | -1.25577400 | 4.76568300  | -0.50372900 |
| N  | 0.09386000  | 4.57011400  | -0.39156200 |
| C  | 5.13754100  | 0.35713100  | -0.03311600 |
| C  | 5.05825100  | -0.99667500 | -0.06584300 |
| H  | 6.10262400  | 0.85336100  | 0.00227700  |
| H  | 5.95911100  | -1.60278800 | -0.05763200 |
| N  | -1.92588500 | -4.51872400 | -0.37527100 |
| N  | -2.14883700 | -3.23033400 | -0.32018000 |
| C  | -0.59921000 | -4.61127100 | -0.38483600 |
| N  | -1.33516700 | 0.08140200  | -2.72363000 |
| O  | -1.51027400 | 0.11455500  | -3.91017900 |
| O  | -0.17186900 | 0.02389300  | -2.21275500 |
| O  | -2.29290900 | 0.10064200  | -1.89278000 |
| N  | -3.71194100 | 0.12739100  | 0.83884500  |
| O  | -3.06689400 | -0.96183700 | 0.70204100  |
| O  | -2.99864400 | 1.16917400  | 0.79050200  |
| O  | -4.89738500 | 0.15329700  | 1.00367100  |
| N  | -0.04745700 | 0.04482200  | 2.87527500  |
| O  | 0.33186500  | 0.02869100  | 4.01211600  |
| O  | -0.31739800 | -1.01796100 | 2.23311300  |
| O  | -0.20217300 | 1.12508900  | 2.22509600  |
| Eu | -0.88705700 | 0.07522300  | 0.12861500  |

EuR<sub>3</sub>PhR<sub>6</sub>(NO<sub>3</sub>)<sub>3</sub> (PBE0/6-311G\*-RECP)

|   |             |             |             |
|---|-------------|-------------|-------------|
| C | -2.35990300 | -1.17699100 | 0.00205900  |
| C | -0.80407700 | -2.86984100 | -0.10507600 |
| C | -1.81657500 | -3.85071800 | -0.09556100 |
| H | -1.57184000 | -4.90568300 | -0.15584000 |
| C | -2.63670500 | 0.24207800  | 0.01102900  |
| C | -3.97954500 | 0.68139700  | 0.06529300  |
| C | -4.19925000 | 2.06914600  | 0.10545000  |
| C | -3.13056900 | 2.92848500  | 0.11527900  |
| H | -5.21488900 | 2.45082300  | 0.14847100  |
| H | -3.29124900 | 3.99880500  | 0.18746800  |
| N | -1.60091000 | 1.09159000  | -0.02388100 |
| C | -3.44169400 | -2.08493200 | 0.01279600  |
| C | 0.60321400  | -3.19172500 | -0.26070600 |
| H | 0.67802700  | -5.30918900 | -0.18756800 |
| H | 3.16149900  | -5.13023700 | -0.59001000 |
| H | 3.63223100  | -2.39059600 | -0.75555300 |
| C | -1.83094300 | 2.39367400  | 0.05481800  |
| H | -1.29124200 | 5.23150000  | -0.14248200 |
| H | 1.18289100  | 5.85163200  | 0.14665100  |

|    |             |             |             |
|----|-------------|-------------|-------------|
| C  | -0.63591600 | 3.22232500  | 0.13024000  |
| N  | 0.56867800  | 2.74015200  | 0.32378700  |
| N  | 1.53781700  | -2.27673400 | -0.43111900 |
| N  | -1.08116500 | -1.57436100 | -0.02498000 |
| C  | -3.12584400 | -3.45535300 | -0.02315100 |
| H  | -3.92456700 | -4.19094700 | -0.01074200 |
| C  | 2.71404500  | -2.93342600 | -0.59217200 |
| C  | 2.49620900  | -4.28505000 | -0.51731200 |
| C  | 0.77195900  | 4.85438800  | 0.17843900  |
| N  | 1.15330000  | -4.43198000 | -0.31019800 |
| C  | -4.78305200 | -1.60090100 | 0.05627000  |
| C  | -5.04325400 | -0.26963100 | 0.08387200  |
| H  | -5.59551700 | -2.32123100 | 0.06788100  |
| H  | -6.06593900 | 0.09292900  | 0.12152200  |
| N  | 1.45480300  | 3.75723500  | 0.35138000  |
| N  | -0.55158200 | 4.57521300  | 0.03994700  |
| N  | 0.38960100  | -0.47527500 | 2.78755300  |
| O  | 0.17450200  | -0.73833100 | 3.94057800  |
| O  | 1.09022300  | -1.22175700 | 2.04112800  |
| O  | -0.08244400 | 0.56061500  | 2.22990400  |
| N  | 3.74503500  | 0.62720200  | 0.26000100  |
| O  | 2.91553700  | 1.01227400  | 1.13207400  |
| O  | 3.23276500  | 0.05997600  | -0.76360700 |
| O  | 4.92858900  | 0.77077800  | 0.37873700  |
| N  | 0.29460700  | 0.62948700  | -2.82750100 |
| O  | 0.02452800  | 0.82792700  | -3.98231000 |
| O  | 0.15121800  | -0.50259500 | -2.28119700 |
| O  | 0.73053600  | 1.54744600  | -2.06794200 |
| Eu | 0.93360500  | 0.18121100  | -0.00306400 |

EuR<sub>3</sub>PhR<sub>7</sub>(NO<sub>3</sub>)<sub>3</sub> (PBE0/6-311G\*-RECP)

|   |            |             |             |
|---|------------|-------------|-------------|
| C | 2.61923700 | 0.63485900  | 0.02132600  |
| C | 1.48526100 | 2.63691400  | -0.03060300 |
| C | 2.69030600 | 3.36701700  | -0.03023700 |
| H | 2.68569900 | 4.45048700  | -0.07998900 |
| C | 2.57490400 | -0.80838900 | 0.00442800  |
| C | 3.78725800 | -1.53416600 | 0.00584000  |
| C | 3.70223300 | -2.93944500 | 0.00760600  |
| C | 2.47518500 | -3.54562900 | 0.03927400  |
| H | 4.61303600 | -3.53086600 | -0.00084200 |
| H | 2.36212600 | -4.62275700 | 0.06650500  |
| N | 1.37412300 | -1.41093900 | -0.00015200 |
| C | 3.87722900 | 1.28038000  | 0.01711700  |
| C | 0.18738600 | 3.27425300  | -0.15953200 |



|    |             |             |             |
|----|-------------|-------------|-------------|
| H  | 0.59075300  | 5.34194300  | 0.06522300  |
| H  | -1.86840100 | 5.75438900  | -0.32899800 |
| H  | -2.94261400 | 3.20936900  | -0.66154400 |
| C  | 1.32726700  | -2.73351400 | 0.04742700  |
| H  | -3.12956300 | -3.09604100 | 0.54019400  |
| H  | -2.09599300 | -5.48353200 | 0.40567200  |
| C  | -0.00693400 | -3.31027800 | 0.16085500  |
| N  | -1.09580900 | -2.51489100 | 0.29318700  |
| N  | -0.92644800 | 2.60402200  | -0.38124900 |
| N  | 1.45991300  | 1.31125900  | 0.02919000  |
| C  | 3.87772200  | 2.68650600  | 0.00752700  |
| H  | 4.82211600  | 3.22267600  | 0.00801400  |
| C  | -1.92542600 | 3.51963000  | -0.48250500 |
| C  | -2.09131900 | -3.36078900 | 0.40947800  |
| C  | -1.40988600 | 4.77872200  | -0.32141800 |
| N  | -0.06845000 | 4.60632800  | -0.12105900 |
| C  | 5.07858200  | 0.51238800  | 0.01429300  |
| C  | 5.03528400  | -0.84327300 | 0.00894300  |
| H  | 6.03032800  | 1.03509800  | 0.01417700  |
| H  | 5.95175200  | -1.42554300 | 0.00735900  |
| N  | -0.27228800 | -4.60146200 | 0.19219500  |
| N  | -1.60189900 | -4.60875800 | 0.34937000  |
| N  | -0.54311100 | -0.48493600 | -2.84342100 |
| O  | -0.41183600 | -0.70025800 | -4.01662100 |
| O  | -1.30962800 | -1.17982200 | -2.10728700 |
| O  | 0.08112600  | 0.44444100  | -2.24798300 |
| N  | -3.82112300 | 0.08647100  | 0.01804100  |
| O  | -3.12974700 | 0.87399700  | -0.69470800 |
| O  | -3.15055100 | -0.70993400 | 0.74457600  |
| O  | -5.02034400 | 0.09057500  | 0.00602300  |
| N  | -0.55078000 | 0.48704400  | 2.83039800  |
| O  | -0.42058900 | 0.67501400  | 4.00906400  |
| O  | -0.17788600 | -0.58375100 | 2.26619800  |
| O  | -1.06406900 | 1.35625200  | 2.05835800  |
| Eu | -0.91390000 | 0.04766000  | -0.01684400 |

EuR<sub>3</sub>PhR<sub>8</sub>(NO<sub>3</sub>)<sub>3</sub> (PBE0/6-311G\*-RECP)

|   |             |             |            |
|---|-------------|-------------|------------|
| C | -2.57406700 | 0.74923900  | 0.00757400 |
| C | -1.35805100 | 2.70157400  | 0.04740000 |
| C | -2.53285100 | 3.48027200  | 0.05718800 |
| H | -2.48380700 | 4.56301300  | 0.09721500 |
| C | -2.58922100 | -0.69606100 | 0.01972000 |
| C | -3.83188800 | -1.37168900 | 0.01975600 |

|    |             |             |             |
|----|-------------|-------------|-------------|
| C  | -3.80083200 | -2.77696300 | 0.00213300  |
| C  | -2.59697800 | -3.43014300 | -0.04728900 |
| H  | -4.73240000 | -3.33474400 | 0.00618400  |
| H  | -2.56239600 | -4.51281500 | -0.10050100 |
| N  | -1.41643100 | -1.34560100 | 0.01647700  |
| C  | -3.80444000 | 1.44406700  | 0.02327800  |
| C  | -0.03194900 | 3.28125500  | 0.15165400  |
| H  | -0.35054000 | 5.37541200  | 0.04790600  |
| H  | 2.13550000  | 5.66063200  | 0.36784300  |
| H  | 3.10369700  | 3.05884500  | 0.56366900  |
| C  | -1.41464800 | -2.66879800 | -0.04881300 |
| H  | -0.34752900 | -5.37883400 | -0.01020700 |
| H  | 3.00440800  | -3.24919800 | -0.70545400 |
| C  | -0.09533500 | -3.26873900 | -0.19307500 |
| N  | 1.00121900  | -2.56851700 | -0.41654500 |
| N  | 1.05784300  | 2.55530600  | 0.30567300  |
| N  | -1.38889900 | 1.37552000  | -0.00903100 |
| C  | -3.74757300 | 2.84937000  | 0.03295500  |
| H  | -4.66899900 | 3.42394000  | 0.03882600  |
| C  | 2.09805300  | 3.42019500  | 0.41755400  |
| C  | 1.97168100  | -3.50175400 | -0.52348500 |
| C  | 1.63412600  | 4.70701200  | 0.32892100  |
| N  | 0.28168200  | 4.60233400  | 0.16231300  |
| N  | 0.22951200  | -4.57253800 | -0.17887400 |
| C  | -5.03636100 | 0.72526500  | 0.03238100  |
| C  | -5.05096900 | -0.63097600 | 0.02987800  |
| H  | -5.96567400 | 1.28682600  | 0.04153300  |
| H  | -5.99094200 | -1.17417000 | 0.03362500  |
| N  | 1.54277900  | -4.74000200 | -0.38547700 |
| N  | 0.46304900  | -0.52289400 | 2.80666400  |
| O  | 0.28211000  | -0.74406900 | 3.97271400  |
| O  | 1.01216900  | -1.36936600 | 2.03369200  |
| O  | 0.10989600  | 0.56133700  | 2.25622000  |
| N  | 3.82428000  | -0.07587200 | 0.09838500  |
| O  | 3.13173400  | 0.69129200  | 0.83601800  |
| O  | 3.15313400  | -0.81323100 | -0.68723200 |
| O  | 5.02128800  | -0.10092700 | 0.13963900  |
| N  | 0.50104100  | 0.51366400  | -2.83965900 |
| O  | 0.33009300  | 0.73295400  | -4.00748700 |
| O  | -0.08109100 | -0.43788400 | -2.23509500 |
| O  | 1.26549100  | 1.22499700  | -2.11979700 |
| Eu | 0.93580000  | -0.00489300 | -0.01517300 |

EuR<sub>4</sub>PhR<sub>4</sub>(NO<sub>3</sub>)<sub>3</sub> (PBE0/6-311G\*-RECP)

|   |             |             |             |
|---|-------------|-------------|-------------|
| C | 2.56133300  | 0.72402800  | -0.00012500 |
| C | 1.35400800  | 2.68475800  | -0.00028700 |
| C | 2.53363200  | 3.45502800  | -0.00030300 |
| H | 2.48045500  | 4.53789100  | -0.00034300 |
| C | 2.56187100  | -0.72187200 | 0.00007500  |
| C | 3.79637900  | -1.40762900 | 0.00013600  |
| C | 3.74733300  | -2.81372800 | 0.00027000  |
| C | 2.53620300  | -3.45288300 | 0.00030400  |
| H | 4.67244500  | -3.38258400 | 0.00032400  |
| H | 2.48382000  | -4.53578500 | 0.00037000  |
| N | 1.38032700  | -1.35914700 | 0.00019700  |
| C | 3.79532700  | 1.41070700  | -0.00015200 |
| C | 0.03769200  | 3.31124300  | -0.00020200 |
| H | 0.19351200  | 5.56423600  | -0.00001600 |
| H | -2.35885600 | 5.32595000  | 0.00018000  |
| C | 1.35600800  | -2.68349400 | 0.00025300  |
| H | 0.19775400  | -5.56381100 | 0.00003000  |
| H | -2.35479900 | -5.32755500 | -0.00023700 |
| C | 0.04014800  | -3.31094700 | 0.00017300  |
| N | -1.09861900 | -2.56570400 | 0.00006500  |
| N | -1.10046800 | 2.56510200  | -0.00010600 |
| N | 1.37929900  | 1.36042600  | -0.00026100 |
| C | 3.74522900  | 2.81676700  | -0.00026500 |
| H | 4.66992300  | 3.38630100  | -0.00029100 |
| N | -0.35646500 | -0.00060600 | -2.86263300 |
| N | -0.35630000 | -0.00089300 | 2.86255800  |
| N | -3.78503400 | -0.00098300 | 0.00019600  |
| O | -0.47820400 | 1.06889700  | 2.19549400  |
| O | -0.13313100 | -0.00108200 | 4.04312300  |
| O | -0.47771300 | -1.07048800 | 2.19504400  |
| O | -0.47945000 | 1.06911200  | -2.19557800 |
| O | -0.47670900 | -1.07027100 | -2.19509100 |
| O | -0.13337600 | -0.00055100 | -4.04321200 |
| O | -3.10519600 | -0.00553200 | -1.07350100 |
| O | -3.10503600 | 0.00400400  | 1.07378700  |
| O | -4.98400700 | -0.00132500 | 0.00028600  |
| N | -2.13812300 | 3.32135300  | 0.00005400  |
| N | -2.13566400 | -3.32277000 | -0.00009400 |
| N | -1.69195100 | 4.57138800  | 0.00004000  |
| N | -1.68849300 | -4.57246600 | -0.00008500 |
| C | -0.34708300 | 4.63228200  | -0.00006100 |
| C | -0.34358800 | -4.63229000 | 0.00005500  |
| C | 5.02086600  | 0.68041000  | -0.00006000 |
| H | 5.95577800  | 1.23270100  | -0.00009600 |

|    |             |             |             |
|----|-------------|-------------|-------------|
| C  | 5.02136700  | -0.67641500 | 0.00006400  |
| H  | 5.95668700  | -1.22801600 | 0.00012100  |
| Eu | -0.92498500 | -0.00027100 | -0.00002600 |

EuR<sub>4</sub>PhR<sub>5</sub>(NO<sub>3</sub>)<sub>3</sub> (PBE0/6-311G\*-RECP)

|   |             |             |             |
|---|-------------|-------------|-------------|
| C | -2.42066900 | 1.18785300  | -0.01738300 |
| C | -0.88588500 | 2.89965500  | 0.10972300  |
| C | -1.90170800 | 3.87297100  | 0.09158400  |
| H | -1.64660600 | 4.92467500  | 0.15278900  |
| C | -2.69207100 | -0.23215400 | -0.02736200 |
| C | -4.03524200 | -0.66878500 | -0.08626100 |
| C | -4.26406400 | -2.05613600 | -0.11310600 |
| C | -3.20255200 | -2.91927300 | -0.10288300 |
| H | -5.28263000 | -2.43018000 | -0.15668200 |
| H | -3.35757700 | -3.99111100 | -0.15153700 |
| N | -1.65628900 | -1.09068000 | 0.01696200  |
| C | -3.50707000 | 2.09268600  | -0.03670100 |
| C | 0.51358300  | 3.26704000  | 0.26759700  |
| H | 0.86118000  | 5.50257200  | 0.24365100  |
| C | -1.89807000 | -2.39323200 | -0.04381900 |
| H | -1.30691500 | -5.44284300 | 0.11185600  |
| H | 1.23650300  | -5.69588900 | -0.10029900 |
| C | -0.73352400 | -3.26652700 | -0.08050300 |
| N | 0.51604100  | -2.75033500 | -0.22465200 |
| N | 1.41355600  | 2.29866000  | 0.41300200  |
| N | -1.14267300 | 1.59921400  | 0.02344500  |
| C | -3.20574700 | 3.46598000  | 0.00452700  |
| H | -4.01296900 | 4.19210700  | -0.01620500 |
| N | 1.39204500  | -3.69120100 | -0.24124700 |
| N | 0.72300600  | -4.82949000 | -0.11158000 |
| C | 1.20962900  | 4.48430100  | 0.32144600  |
| C | -0.60507500 | -4.63417000 | -0.00809300 |
| C | -4.84704100 | 1.60841800  | -0.09259200 |
| H | -5.65971100 | 2.32819700  | -0.11271600 |
| C | -5.10184300 | 0.27731200  | -0.11858500 |
| H | -6.12226900 | -0.09094400 | -0.16306600 |
| N | 2.55401300  | 2.91653600  | 0.53484500  |
| H | 3.40321000  | 2.36930600  | 0.63141400  |
| N | 2.50270800  | 4.22508200  | 0.49004400  |
| N | 0.55674500  | 0.36165700  | -2.80301000 |
| O | 0.45522600  | 0.57586900  | -3.97820600 |
| O | 1.22125100  | 1.11970000  | -2.02910100 |
| O | -0.00016900 | -0.62934600 | -2.24041800 |

|    |            |             |             |
|----|------------|-------------|-------------|
| N  | 3.74128600 | -0.49018900 | -0.32889800 |
| O  | 2.90109700 | -1.18547200 | -0.95808500 |
| O  | 3.23838700 | 0.31460700  | 0.53288200  |
| O  | 4.92222700 | -0.56016300 | -0.51000800 |
| N  | 0.50512800 | -0.61035200 | 2.85732300  |
| O  | 0.35835200 | -0.79643500 | 4.03305200  |
| O  | 0.08683100 | 0.43552800  | 2.27509200  |
| O  | 1.08237900 | -1.45459300 | 2.10337200  |
| Eu | 0.88076600 | -0.18589500 | 0.01496800  |

EuR<sub>4</sub>PhR<sub>6</sub>(NO<sub>3</sub>)<sub>3</sub> (PBE0/6-311G\*-RECP)

|   |             |             |             |
|---|-------------|-------------|-------------|
| C | -2.60655200 | 0.43127600  | -0.00175100 |
| C | -1.63323500 | 2.51333700  | -0.07308100 |
| C | -2.88737100 | 3.14879600  | -0.11004500 |
| H | -2.96635700 | 4.22849700  | -0.17801200 |
| C | -2.44231900 | -1.00494400 | 0.02182900  |
| C | -3.59282600 | -1.82232000 | 0.04660300  |
| C | -3.38929000 | -3.21363300 | 0.09224700  |
| C | -2.11492500 | -3.71243400 | 0.12900700  |
| H | -4.24564100 | -3.88120400 | 0.11080400  |
| H | -1.94187300 | -4.78107600 | 0.18743300  |
| N | -1.19642100 | -1.50526600 | 0.02399500  |
| C | -3.91134500 | 0.97651600  | -0.02831500 |
| C | -0.37759200 | 3.24769400  | -0.15450100 |
| H | -0.88937300 | 5.30686900  | 0.03987700  |
| C | -1.02683000 | -2.81756000 | 0.09789500  |
| H | 0.45090300  | -5.54849800 | 0.10982500  |
| H | 2.95106700  | -5.02381100 | 0.32088100  |
| C | 0.34759200  | -3.29325000 | 0.17818800  |
| N | 1.38748100  | -2.42240900 | 0.28846400  |
| N | 0.79315500  | 2.67608700  | -0.31221700 |
| N | -1.50747100 | 1.19700900  | 0.00027400  |
| C | -4.02034500 | 2.37670400  | -0.07579600 |
| H | -5.00311200 | 2.83782700  | -0.09932100 |
| N | 2.50186800  | -3.05718400 | 0.35271600  |
| N | 2.20360800  | -4.34976300 | 0.28771800  |
| C | 0.87879100  | -4.56219700 | 0.18023300  |
| C | -5.04741400 | 0.11376000  | -0.01085500 |
| H | -6.03873500 | 0.55617100  | -0.02855100 |
| C | -4.89274500 | -1.23321100 | 0.02805400  |
| H | -5.75939500 | -1.88723200 | 0.04470400  |
| N | 1.75075100  | 3.62512900  | -0.35643900 |
| H | 1.62673000  | 5.73893300  | -0.22064600 |

|    |             |             |             |
|----|-------------|-------------|-------------|
| C  | 1.14584100  | 4.77302900  | -0.22855600 |
| N  | -0.19595300 | 4.59298400  | -0.10328200 |
| N  | 3.76366800  | 0.41889700  | -0.04003200 |
| O  | 3.12504200  | 0.05271300  | 0.99778100  |
| O  | 4.95394700  | 0.54303200  | -0.05012600 |
| O  | 3.04504900  | 0.63941700  | -1.06404200 |
| N  | 0.33540000  | -0.43602900 | -2.82229800 |
| O  | 0.09106400  | -0.66436700 | -3.97713100 |
| O  | 0.00711600  | 0.65171700  | -2.26246300 |
| O  | 0.92768500  | -1.27277600 | -2.07757500 |
| N  | 0.30560800  | 0.47593600  | 2.82243200  |
| O  | 0.04475900  | 0.62522800  | 3.98682800  |
| O  | 0.60901900  | 1.44792700  | 2.06739300  |
| O  | 0.28295500  | -0.65916100 | 2.26258100  |
| Eu | 0.94530600  | 0.11915200  | -0.01411500 |

EuR<sub>4</sub>PhR<sub>7</sub>(NO<sub>3</sub>)<sub>3</sub> (PBE0/6-311G\*-RECP)

|   |             |             |             |
|---|-------------|-------------|-------------|
| C | -2.48800200 | -0.97387900 | -0.01649900 |
| C | -1.09988800 | -2.80117100 | 0.08182000  |
| C | -2.18349900 | -3.69662000 | 0.05507900  |
| H | -1.99186800 | -4.76196500 | 0.09966300  |
| C | -2.63990900 | 0.46221700  | -0.01363400 |
| C | -3.94175100 | 1.00997400  | -0.05720200 |
| C | -4.05111800 | 2.41198700  | -0.07275600 |
| C | -2.91911800 | 3.18100100  | -0.07221600 |
| H | -5.03413200 | 2.87263300  | -0.10240600 |
| H | -2.98339200 | 4.26238200  | -0.11508700 |
| N | -1.53400600 | 1.22779700  | 0.02382500  |
| C | -3.64186400 | -1.78950000 | -0.03974900 |
| C | 0.27025800  | -3.27646600 | 0.23888600  |
| C | -1.66259400 | 2.54616000  | -0.03242800 |
| H | -0.81119900 | 5.53159200  | 0.11138300  |
| H | 1.73920400  | 5.57019700  | -0.15583000 |
| C | -0.42780300 | 3.31540100  | -0.09338100 |
| N | 0.77043800  | 2.69540900  | -0.26533700 |
| N | 1.29667200  | -2.40419400 | 0.39218800  |
| N | -1.24671200 | -1.48680600 | 0.01631000  |
| C | -3.45101500 | -3.18420100 | -0.01792200 |
| H | -4.31434100 | -3.84258300 | -0.04332600 |
| N | 1.72176900  | 3.55859200  | -0.30069300 |
| N | 1.15448300  | 4.75030900  | -0.15610500 |
| C | -0.18278600 | 4.66693100  | -0.02415700 |
| C | -4.93764400 | -1.19470500 | -0.07894000 |
| H | -5.80757900 | -1.84411400 | -0.10029900 |

|    |             |             |             |
|----|-------------|-------------|-------------|
| C  | -5.08189600 | 0.15367000  | -0.08814700 |
| H  | -6.06942700 | 0.60400600  | -0.11967900 |
| H  | 2.50439300  | -5.29114400 | 0.55727900  |
| C  | 2.34744800  | -3.17427700 | 0.54111000  |
| H  | 3.36113100  | -2.83325300 | 0.68908700  |
| N  | 1.95032000  | -4.45459100 | 0.48192800  |
| N  | 0.62797800  | -4.54409100 | 0.29111800  |
| N  | 0.47560300  | 0.55762300  | 2.85121300  |
| O  | 0.31398000  | 0.75705100  | 4.02429400  |
| O  | 0.13488900  | -0.52512700 | 2.29091900  |
| O  | 0.99289900  | 1.42636200  | 2.08211100  |
| N  | 3.77288600  | 0.26586100  | -0.26049500 |
| O  | 3.21434600  | -0.38603000 | 0.68435700  |
| O  | 4.96373500  | 0.28437500  | -0.39923000 |
| O  | 2.98222300  | 0.87587000  | -1.03337600 |
| N  | 0.47408100  | -0.42633200 | -2.81183000 |
| O  | 0.32825200  | -0.63180300 | -3.98530900 |
| O  | 1.05742000  | -1.25416100 | -2.04544000 |
| O  | 0.04744600  | 0.62477400  | -2.24690600 |
| Eu | 0.91155800  | 0.09913600  | 0.00815600  |

EuR<sub>4</sub>PhR<sub>8</sub>(NO<sub>3</sub>)<sub>3</sub> (PBE0/6-311G\*-RECP)

|   |             |             |             |
|---|-------------|-------------|-------------|
| C | 2.53342300  | 0.79516500  | -0.02798400 |
| C | 1.27371500  | 2.71578000  | 0.07454500  |
| C | 2.42128000  | 3.52794700  | 0.06128300  |
| H | 2.34122700  | 4.60792300  | 0.12000100  |
| C | 2.58094100  | -0.64961500 | -0.02987800 |
| C | 3.83955000  | -1.28818200 | -0.07549300 |
| C | 3.84704400  | -2.69480500 | -0.09763200 |
| C | 2.66191600  | -3.37906200 | -0.10069000 |
| H | 4.79360900  | -3.22614800 | -0.12875400 |
| H | 2.64785600  | -4.46207800 | -0.14706300 |
| N | 1.42318700  | -1.33129900 | 0.00486200  |
| C | 3.74462400  | 1.52579700  | -0.04391600 |
| C | -0.07047900 | 3.25508200  | 0.23602500  |
| C | 1.45395800  | -2.65533000 | -0.05732300 |
| H | 0.38651000  | -5.57297100 | 0.04334300  |
| H | -2.16154100 | -5.41936600 | -0.19987900 |
| C | 0.16582500  | -3.33086500 | -0.11903800 |
| N | -0.98525300 | -2.62180000 | -0.26957700 |
| N | -1.13835200 | 2.50295900  | 0.43052600  |
| N | 1.33487200  | 1.39447400  | 0.00110100  |
| C | 3.65160700  | 2.92795300  | -0.01225100 |
| H | 4.55766200  | 3.52607700  | -0.02748100 |

|    |             |             |             |
|----|-------------|-------------|-------------|
| N  | -1.99711700 | -3.41189500 | -0.31099200 |
| N  | -1.51793900 | -4.64478400 | -0.19163400 |
| C  | -0.17753400 | -4.66200100 | -0.07062600 |
| C  | 4.99453500  | 0.84002000  | -0.08407600 |
| H  | 5.90962800  | 1.42401800  | -0.09995800 |
| C  | 5.03877400  | -0.51520600 | -0.10070500 |
| H  | 5.99113200  | -1.03570100 | -0.13336200 |
| C  | -2.14621200 | 3.38906000  | 0.57569300  |
| H  | -3.16687200 | 3.08709700  | 0.75247500  |
| N  | -0.45019600 | 4.54344100  | 0.27334000  |
| H  | 0.09339400  | 5.37952900  | 0.14292000  |
| N  | -1.76895500 | 4.64840900  | 0.48657500  |
| N  | -0.39228200 | -0.55748900 | 2.83669400  |
| O  | -0.17304000 | -0.78986300 | 3.99431500  |
| O  | 0.00934400  | 0.50011000  | 2.26725500  |
| O  | -1.03310800 | -1.36280700 | 2.09367100  |
| N  | -3.79086300 | -0.02617600 | -0.22116500 |
| O  | -3.18493600 | 0.54112200  | 0.74830700  |
| O  | -4.98303000 | 0.00323600  | -0.33016300 |
| O  | -3.03965100 | -0.61253200 | -1.05366500 |
| N  | -0.41484500 | 0.48008600  | -2.79555800 |
| O  | -0.22114000 | 0.68307900  | -3.96303900 |
| O  | -0.91166000 | 1.36040200  | -2.02746300 |
| O  | -0.12493300 | -0.62109200 | -2.23984300 |
| Eu | -0.93792000 | -0.02481800 | 0.02041200  |

EuR<sub>5</sub>PhR<sub>5</sub>(NO<sub>3</sub>)<sub>3</sub> (PBE0/6-311G\*-RECP)

|   |             |             |             |
|---|-------------|-------------|-------------|
| C | -2.66281500 | 0.72276900  | 0.00046200  |
| C | -1.47509200 | 2.69585000  | 0.04958600  |
| C | -2.65533000 | 3.45993200  | 0.07223900  |
| H | -2.60129500 | 4.54157800  | 0.11643700  |
| C | -2.66295000 | -0.72256700 | 0.00041100  |
| C | -3.90018200 | -1.40649900 | -0.01851400 |
| C | -3.86215100 | -2.81205500 | -0.04488100 |
| C | -2.65594600 | -3.45973700 | -0.07136800 |
| H | -4.79208700 | -3.37267500 | -0.05703000 |
| H | -2.60209900 | -4.54139300 | -0.11557000 |
| N | -1.48372600 | -1.36838800 | 0.01209300  |
| C | -3.89992800 | 1.40691700  | 0.01924600  |
| C | -0.16220500 | 3.32113100  | 0.12165300  |
| H | -0.23760600 | 5.58020100  | 0.03457400  |
| C | -1.47558300 | -2.69585700 | -0.04864900 |
| H | -0.23849100 | -5.58041900 | -0.03428400 |
| C | -0.16280400 | -3.32135000 | -0.12096100 |



|    |             |             |             |
|----|-------------|-------------|-------------|
| N  | 0.90838300  | -2.53994100 | -0.23241900 |
| N  | 0.90890300  | 2.53958100  | 0.23277000  |
| N  | -1.48347000 | 1.36837900  | -0.01110500 |
| C  | -3.86164700 | 2.81246800  | 0.04565000  |
| H  | -4.79148300 | 3.37325400  | 0.05772000  |
| N  | 1.62325400  | 4.63429600  | 0.21054600  |
| N  | 1.62243200  | -4.63474800 | -0.21093300 |
| C  | 0.29753500  | 4.64648600  | 0.11131200  |
| C  | 0.29674800  | -4.64676900 | -0.11112800 |
| C  | -5.12602500 | 0.67796800  | 0.01145100  |
| H  | -6.05991500 | 1.23156600  | 0.02227900  |
| C  | -5.12614900 | -0.67733000 | -0.01087700 |
| H  | -6.06013900 | -1.23075600 | -0.02183100 |
| N  | 1.92039100  | 3.36096900  | 0.27682100  |
| H  | 2.86189700  | 2.99059600  | 0.34905700  |
| N  | 1.91974000  | -3.36146700 | -0.27709200 |
| H  | 2.86123200  | -2.99120200 | -0.35009200 |
| N  | 0.74655400  | -0.35692700 | 2.85985500  |
| N  | 0.74304900  | 0.35790300  | -2.85941000 |
| N  | 3.78017300  | -0.00030500 | -0.00192000 |
| O  | 0.10409300  | -0.56510200 | -2.25967300 |
| O  | 0.71053300  | 0.49000200  | -4.04889400 |
| O  | 1.40940600  | 1.13052800  | -2.10393300 |
| O  | 1.41138500  | -1.13058100 | 2.10410300  |
| O  | 0.10712700  | 0.56582800  | 2.26020800  |
| O  | 0.71582100  | -0.48782500 | 4.04951600  |
| O  | 3.09357900  | -0.95450600 | -0.48142800 |
| O  | 3.09450300  | 0.95399900  | 0.47857800  |
| O  | 4.97535500  | -0.00043800 | -0.00285100 |
| Eu | 0.83830100  | -0.00031100 | 0.00008700  |

EuR<sub>5</sub>PhR<sub>6</sub>(NO<sub>3</sub>)<sub>3</sub> (PBE0/6-311G\*-RECP)

|   |             |             |             |
|---|-------------|-------------|-------------|
| C | -2.35872900 | -1.32248000 | -0.01419000 |
| C | -0.73355900 | -2.94564600 | 0.11057300  |
| C | -1.69667000 | -3.97215000 | 0.09153100  |
| H | -1.38474500 | -5.00864500 | 0.14892600  |
| C | -2.70600000 | 0.08052400  | -0.02721400 |
| C | -4.07086800 | 0.45024700  | -0.08910600 |
| C | -4.36641600 | 1.82315500  | -0.12714400 |
| C | -3.34707600 | 2.73961700  | -0.12520000 |
| H | -5.40131500 | 2.14802100  | -0.17660700 |
| H | -3.56428700 | 3.79996100  | -0.19459600 |
| N | -1.71706500 | 0.98687400  | 0.01632900  |
| C | -3.39576100 | -2.28167000 | -0.03224300 |

|    |             |             |             |
|----|-------------|-------------|-------------|
| C  | 0.68330400  | -3.23323000 | 0.26596300  |
| H  | 1.16034400  | -5.44517600 | 0.28638800  |
| C  | -2.02224700 | 2.27493500  | -0.05726900 |
| H  | -1.64873000 | 5.13728200  | 0.16228400  |
| C  | -0.87782900 | 3.17131300  | -0.11622500 |
| N  | 0.35355700  | 2.75932200  | -0.30255100 |
| N  | 1.52551400  | -2.21154100 | 0.39146900  |
| N  | -1.06031200 | -1.66029200 | 0.02675400  |
| C  | -3.02128800 | -3.63702400 | 0.00759800  |
| H  | -3.78762100 | -4.40611300 | -0.01323000 |
| N  | 2.72373800  | -4.06912300 | 0.50771500  |
| C  | 1.44854600  | -4.40687700 | 0.34316100  |
| C  | -4.75958700 | -1.86655500 | -0.08708100 |
| H  | -5.53350200 | -2.62792300 | -0.10481700 |
| C  | -5.08637800 | -0.55103800 | -0.11658400 |
| H  | -6.12513000 | -0.23880700 | -0.16186400 |
| N  | 2.69855100  | -2.75883800 | 0.52637300  |
| H  | 3.51153000  | -2.15775800 | 0.62480800  |
| N  | 1.18117100  | 3.82505900  | -0.31770800 |
| N  | -0.87122100 | 4.52529000  | -0.01723600 |
| C  | 0.43572200  | 4.87982800  | -0.14459100 |
| H  | 0.78952100  | 5.89846100  | -0.10514800 |
| N  | 0.62711200  | -0.37965300 | -2.80229900 |
| O  | 0.52258000  | -0.60691700 | -3.97476300 |
| O  | -0.04254200 | 0.53755400  | -2.22840200 |
| O  | 1.39803900  | -1.03914100 | -2.04401100 |
| N  | 3.73661800  | 0.69890300  | -0.26307000 |
| O  | 2.87990700  | 1.38299300  | -0.87812500 |
| O  | 3.25308900  | -0.14767600 | 0.57303100  |
| O  | 4.91655300  | 0.81050900  | -0.42995900 |
| N  | 0.44189600  | 0.65892100  | 2.85419300  |
| O  | 0.24199800  | 0.81043300  | 4.02752900  |
| O  | 0.78257500  | 1.61300700  | 2.09191600  |
| O  | 0.31486300  | -0.46914300 | 2.28466300  |
| Eu | 0.88285000  | 0.25278700  | 0.00836800  |

EuR<sub>5</sub>PhR<sub>7</sub>(NO<sub>3</sub>)<sub>3</sub> (PBE0/6-311G\*-RECP)

|   |            |             |             |
|---|------------|-------------|-------------|
| C | 2.61362600 | 0.86283200  | -0.09819800 |
| C | 1.32859600 | 2.76544800  | -0.21492500 |
| C | 2.46910300 | 3.58856900  | -0.23605300 |
| H | 2.36151900 | 4.66531000  | -0.30017400 |
| C | 2.68154200 | -0.57928400 | -0.08480700 |
| C | 3.94585000 | -1.21026700 | -0.06897200 |
| C | 3.96824900 | -2.61723200 | -0.10017200 |

|    |             |             |             |
|----|-------------|-------------|-------------|
| C  | 2.79143400  | -3.31478800 | -0.16938400 |
| H  | 4.92078800  | -3.13846100 | -0.08255700 |
| H  | 2.76270500  | -4.39686900 | -0.21396900 |
| N  | 1.53067400  | -1.27138800 | -0.12126400 |
| C  | 3.81598000  | 1.60548700  | -0.10387700 |
| C  | -0.01626900 | 3.32276000  | -0.27339800 |
| H  | -0.03940800 | 5.58358300  | -0.34075900 |
| C  | 1.58597800  | -2.59273000 | -0.18370800 |
| C  | 0.29769300  | -3.26943300 | -0.28781800 |
| N  | -0.85887300 | -2.56096900 | -0.34413500 |
| N  | -1.05591800 | 2.49106100  | -0.25347500 |
| N  | 1.40375800  | 1.44314000  | -0.13317700 |
| C  | 3.70724600  | 3.00583600  | -0.16862200 |
| H  | 4.60676600  | 3.61421500  | -0.17409400 |
| N  | -1.86285400 | 4.55258300  | -0.30852700 |
| C  | -0.53484800 | 4.62553400  | -0.31440700 |
| C  | 5.07295300  | 0.93188200  | -0.05871400 |
| H  | 5.98123900  | 1.52682100  | -0.04825900 |
| C  | 5.13565500  | -0.42284200 | -0.03996100 |
| H  | 6.09475300  | -0.93102700 | -0.01375800 |
| N  | -2.10549500 | 3.26735100  | -0.27637700 |
| H  | -3.02799400 | 2.85860100  | -0.17182300 |
| C  | -1.79153000 | -3.48305500 | -0.42377800 |
| H  | -2.85517800 | -3.30278000 | -0.45395000 |
| N  | -1.20162900 | -4.68555900 | -0.42645400 |
| H  | -1.62774300 | -5.59617400 | -0.47421700 |
| N  | 0.13104200  | -4.57511300 | -0.33882800 |
| N  | -1.29752400 | -0.04890800 | -2.74231400 |
| O  | -1.46173100 | -0.07416700 | -3.93036800 |
| O  | -0.13973100 | 0.00651400  | -2.21932700 |
| O  | -2.26333400 | -0.07748000 | -1.92037900 |
| N  | -3.72884400 | -0.11279900 | 0.74721000  |
| O  | -3.02307700 | -1.16009400 | 0.68874400  |
| O  | -3.07005000 | 0.97328500  | 0.67245500  |
| O  | -4.91979000 | -0.13413800 | 0.86729600  |
| N  | -0.12108300 | -0.09057000 | 2.88137100  |
| O  | 0.21545100  | -0.10561100 | 4.03063500  |
| O  | -0.29596800 | -1.15462300 | 2.20870400  |
| O  | -0.32454400 | 0.99103600  | 2.24522700  |
| Eu | -0.87580300 | -0.05039800 | 0.11590800  |

EuR<sub>5</sub>PhR<sub>8</sub>(NO<sub>3</sub>)<sub>3</sub> (PBE0/6-311G\*-RECP)

|   |             |             |             |
|---|-------------|-------------|-------------|
| C | -2.54828600 | -1.04772800 | 0.06601300  |
| C | -1.14240900 | -2.86425800 | 0.02941600  |
| C | -2.22588800 | -3.76196400 | 0.03057500  |
| H | -2.04631400 | -4.83068000 | 0.00555200  |
| C | -2.71298800 | 0.38775400  | 0.07134500  |
| C | -4.02068300 | 0.92893400  | 0.09416100  |
| C | -4.14060500 | 2.32820200  | 0.13087000  |
| C | -3.01324200 | 3.10633300  | 0.16953600  |
| H | -5.12669000 | 2.78231500  | 0.14532400  |
| H | -3.09494400 | 4.18608800  | 0.22877200  |
| N | -1.61455600 | 1.15994500  | 0.06853900  |
| C | -3.69945600 | -1.86750200 | 0.06271700  |
| C | 0.23568200  | -3.32608700 | -0.04479200 |
| H | 0.43999400  | -5.57764600 | 0.02996500  |
| C | -1.75743200 | 2.47600600  | 0.14301900  |
| H | -1.02138100 | 5.28808100  | 0.16327000  |
| C | -0.51025600 | 3.22030600  | 0.24304000  |
| N | 0.67539600  | 2.65060500  | 0.36660900  |
| N | 1.20078400  | -2.41715700 | -0.16493300 |
| N | -1.30402900 | -1.54753600 | 0.06598800  |
| C | -3.49971000 | -3.25968400 | 0.05293000  |
| H | -4.35802600 | -3.92487800 | 0.05398600  |
| N | 2.16726300  | -4.40832100 | -0.16967200 |
| C | 0.85470800  | -4.58463100 | -0.04836100 |
| C | -5.00015200 | -1.28099800 | 0.07065600  |
| H | -5.86559300 | -1.93669500 | 0.06565200  |
| C | -5.15614800 | 0.06561100  | 0.08710300  |
| H | -6.14722300 | 0.50848000  | 0.09777500  |
| N | 2.30404800  | -3.10820400 | -0.23052600 |
| H | 3.18572400  | -2.61943200 | -0.35337000 |
| N | -0.34199100 | 4.55220100  | 0.25557600  |
| C | 1.53606200  | 3.69191100  | 0.44147200  |
| H | 2.60271900  | 3.56276600  | 0.53219600  |
| N | 0.95353700  | 4.87065600  | 0.38057000  |
| N | 0.28741600  | 0.46630900  | -2.84837600 |
| O | 0.01792900  | 0.59971900  | -4.00823100 |
| O | 0.70384800  | 1.42689600  | -2.12932800 |
| O | 0.16682700  | -0.64561500 | -2.24536200 |
| N | 3.79399800  | 0.37786300  | -0.32705200 |
| O | 3.14431700  | -0.64159500 | -0.73974000 |
| O | 3.07329200  | 1.31894400  | 0.10303100  |
| O | 4.98878500  | 0.42493300  | -0.35390700 |
| N | 1.04346500  | -0.30448800 | 2.80313300  |
| O | 1.08858200  | -0.46751600 | 3.98950500  |

|    |            |             |             |
|----|------------|-------------|-------------|
| O  | 0.06991900 | 0.29563900  | 2.23933000  |
| O  | 1.95018400 | -0.71707700 | 2.02078600  |
| Eu | 0.89602800 | 0.13477200  | -0.04722200 |

EuR<sub>6</sub>PhR<sub>6</sub>(NO<sub>3</sub>)<sub>3</sub> (PBE0/6-311G\*-RECP)

|   |             |             |             |
|---|-------------|-------------|-------------|
| C | 2.54339200  | 0.72409000  | -0.00009600 |
| C | 1.32960200  | 2.67366900  | -0.00003000 |
| C | 2.50178400  | 3.45181400  | -0.00007100 |
| H | 2.45500700  | 4.53550400  | -0.00005500 |
| C | 2.54392100  | -0.72230000 | -0.00011500 |
| C | 3.77698900  | -1.41129300 | -0.00016500 |
| C | 3.72126800  | -2.81571000 | -0.00017700 |
| C | 2.50429800  | -3.45005600 | -0.00014000 |
| H | 4.64215500  | -3.39097000 | -0.00021300 |
| H | 2.45831300  | -4.53378000 | -0.00014600 |
| N | 1.36293100  | -1.34912800 | -0.00008500 |
| C | 3.77595700  | 1.41398200  | -0.00013900 |
| C | -0.00668100 | 3.25424800  | 0.00003100  |
| H | 0.27045900  | 5.36749600  | -0.00009500 |
| C | 1.33155000  | -2.67276400 | -0.00009300 |
| H | 0.27436800  | -5.36735600 | -0.00015900 |
| C | -0.00431100 | -3.25431200 | -0.00005400 |
| N | -1.11113800 | -2.54829800 | 0.00000200  |
| N | -1.11299500 | 2.54742800  | 0.00012800  |
| N | 1.36194500  | 1.35005500  | -0.00004100 |
| C | 3.71921600  | 2.81835500  | -0.00012400 |
| H | 4.63968600  | 3.39428300  | -0.00015300 |
| N | -0.27500700 | -0.00007300 | -2.85582900 |
| N | -0.27433600 | -0.00018200 | 2.85578700  |
| N | -3.81949400 | -0.00121200 | 0.00014200  |
| O | -0.44013200 | 1.06989300  | 2.19956600  |
| O | 0.02869500  | -0.00010200 | 4.02004300  |
| O | -0.43952500 | -1.07034300 | 2.19955300  |
| O | -0.43982000 | -1.07025400 | -2.19952800 |
| O | -0.44033900 | 1.06998000  | -2.19946200 |
| O | 0.02825800  | 0.00003400  | -4.02002400 |
| O | -3.13702200 | -0.00136200 | 1.07393500  |
| O | -3.13708500 | -0.00052600 | -1.07368900 |
| O | -5.01614100 | -0.00137800 | 0.00017800  |
| N | -2.17318500 | -3.37719000 | 0.00004300  |
| N | -0.34292200 | 4.57087900  | 0.00000000  |
| N | -0.33959300 | -4.57118600 | -0.00009700 |
| N | -2.17564400 | 3.37554800  | 0.00017100  |
| C | -1.70193300 | 4.59056900  | 0.00009900  |

|    |             |             |             |
|----|-------------|-------------|-------------|
| H  | -2.29141500 | 5.49427200  | 0.00010700  |
| C  | -1.69859100 | -4.59186600 | -0.00002900 |
| H  | -2.28741400 | -5.49599900 | -0.00003000 |
| C  | 5.00124800  | 0.68035100  | -0.00019200 |
| H  | 5.93731300  | 1.23050600  | -0.00022200 |
| C  | 5.00174400  | -0.67676600 | -0.00020300 |
| H  | 5.93821100  | -1.22623500 | -0.00024200 |
| Eu | -0.98146700 | -0.00037800 | 0.00006500  |

EuR<sub>6</sub>PhR<sub>7</sub>(NO<sub>3</sub>)<sub>3</sub> (PBE0/6-311G\*-RECP)

|   |             |             |             |
|---|-------------|-------------|-------------|
| C | -2.65845400 | 0.19818000  | 0.00163000  |
| C | -1.88940400 | 2.36363300  | -0.03223800 |
| C | -3.19716600 | 2.87821900  | -0.08273400 |
| H | -3.37514100 | 3.94622600  | -0.14766300 |
| C | -2.36149300 | -1.21543400 | 0.00304400  |
| C | -3.42704700 | -2.14150300 | -0.01246200 |
| C | -3.09538700 | -3.50975400 | 0.01265700  |
| C | -1.78138100 | -3.88910500 | 0.08178500  |
| H | -3.88651500 | -4.25340300 | -0.00760600 |
| H | -1.48228400 | -4.92932700 | 0.12875800  |
| N | -1.07464000 | -1.59605400 | 0.03145400  |
| C | -4.00853700 | 0.61742200  | -0.04463800 |
| C | -0.70962900 | 3.21372300  | -0.10967800 |
| H | -1.39840600 | 5.20726600  | 0.18973100  |
| H | 1.06153900  | 5.87541100  | -0.11808800 |
| C | -0.79337700 | -2.88810900 | 0.10107800  |
| H | 3.04056600  | -4.99711400 | 0.61279400  |
| C | 0.61859500  | -3.21967100 | 0.25765200  |
| N | 1.55348600  | -2.24714800 | 0.39247800  |
| N | 0.50139200  | 2.75524900  | -0.32012800 |
| N | -1.63578400 | 1.06515000  | 0.03705400  |
| C | -4.25142600 | 2.00117900  | -0.07438600 |
| H | -5.27346900 | 2.36612700  | -0.11083800 |
| N | 1.36913300  | 3.78875000  | -0.34615700 |
| C | 0.66834100  | 4.87124300  | -0.15571100 |
| N | -0.64860600 | 4.56665700  | -0.00665900 |
| C | -4.77608300 | -1.67688600 | -0.04976000 |
| H | -5.57707200 | -2.40982200 | -0.06483100 |
| C | -5.05709400 | -0.34995200 | -0.06671700 |
| H | -6.08537200 | -0.00290400 | -0.09874800 |
| C | 2.67455600  | -2.90633200 | 0.55653100  |
| H | 3.64923500  | -2.46478700 | 0.70123700  |
| N | 2.40652000  | -4.22110600 | 0.52126600  |

|    |             |             |             |
|----|-------------|-------------|-------------|
| N  | 1.10014200  | -4.44452900 | 0.33365600  |
| N  | 0.39383600  | 0.61750500  | 2.83294200  |
| O  | 0.18061100  | 0.79796300  | 4.00149900  |
| O  | 0.24922600  | -0.51226700 | 2.28124300  |
| O  | 0.76878500  | 1.55336100  | 2.06120600  |
| N  | 3.74615000  | 0.63549800  | -0.27306100 |
| O  | 3.24418500  | -0.00991600 | 0.70907200  |
| O  | 2.90704400  | 1.11877200  | -1.08316200 |
| O  | 4.93046500  | 0.75771100  | -0.41037100 |
| N  | 0.42680300  | -0.44751700 | -2.80086000 |
| O  | 0.24478900  | -0.70676500 | -3.95879300 |
| O  | 1.16089300  | -1.16192300 | -2.05224400 |
| O  | -0.11164700 | 0.55140300  | -2.23548900 |
| Eu | 0.92115800  | 0.20900500  | -0.01140700 |

EuR<sub>6</sub>PhR<sub>8</sub>(NO<sub>3</sub>)<sub>3</sub> (PBE0/6-311G\*-RECP)

|   |             |             |             |
|---|-------------|-------------|-------------|
| C | 2.64544400  | 0.25529700  | -0.00220800 |
| C | 1.82230700  | 2.40161800  | -0.00658800 |
| C | 3.12019100  | 2.94388300  | -0.04794000 |
| H | 3.27572200  | 4.01646300  | -0.08825100 |
| C | 2.38066300  | -1.16653100 | -0.00530300 |
| C | 3.46844000  | -2.06808600 | -0.03120900 |
| C | 3.16365200  | -3.44050500 | -0.02402700 |
| C | 1.85543700  | -3.84659400 | 0.02473800  |
| H | 3.96747400  | -4.16995400 | -0.04852000 |
| H | 1.61323300  | -4.90345400 | 0.04483300  |
| N | 1.10412900  | -1.57348400 | 0.01930800  |
| C | 3.98510800  | 0.70355800  | -0.03990300 |
| C | 0.62849300  | 3.23441100  | -0.04020700 |
| H | 1.31058000  | 5.24358800  | 0.18005700  |
| H | -1.16753900 | 5.87951900  | 0.00635600  |
| C | 0.84066300  | -2.87254700 | 0.05225200  |
| C | -0.57146100 | -3.21475400 | 0.16073800  |
| N | -1.53713600 | -2.32091700 | 0.25746300  |
| N | -0.58777000 | 2.76236800  | -0.17547700 |
| N | 1.60155200  | 1.09507200  | 0.03362100  |
| C | 4.19524200  | 2.09311600  | -0.05502100 |
| H | 5.20801700  | 2.48328400  | -0.08554500 |
| N | -1.46550100 | 3.78562300  | -0.17075700 |
| C | -0.76639300 | 4.87867400  | -0.03612000 |
| N | 0.55884200  | 4.58947100  | 0.04604400  |
| C | 4.80689900  | -1.57358900 | -0.06222100 |
| H | 5.62483400  | -2.28720600 | -0.08282900 |

|    |             |             |             |
|----|-------------|-------------|-------------|
| C  | 5.05548600  | -0.24020600 | -0.06726700 |
| H  | 6.07555300  | 0.13062600  | -0.09359900 |
| C  | -2.65851300 | -3.05694300 | 0.39228400  |
| H  | -3.63654800 | -2.61649400 | 0.50990700  |
| N  | -1.12190900 | -4.44025200 | 0.23470000  |
| H  | -0.68919200 | -5.34712700 | 0.19323900  |
| N  | -2.44994000 | -4.35905200 | 0.38127300  |
| N  | -0.39161800 | -0.24287900 | -2.82654400 |
| O  | -0.18792200 | -0.40971000 | -3.99782900 |
| O  | -0.92458200 | -1.13251300 | -2.09565900 |
| O  | -0.07878400 | 0.82926900  | -2.22791600 |
| N  | -3.75186800 | 0.59174000  | -0.24774500 |
| O  | -2.92672400 | 1.01828200  | -1.10686100 |
| O  | -3.23098800 | -0.00658000 | 0.75377600  |
| O  | -4.93666800 | 0.72652000  | -0.36105000 |
| N  | -0.39545100 | 0.40178300  | 2.86548400  |
| O  | -0.16681600 | 0.49865400  | 4.04032900  |
| O  | -0.48781400 | -0.71542700 | 2.27847300  |
| O  | -0.55223600 | 1.41710100  | 2.11897600  |
| Eu | -0.92722400 | 0.18341000  | 0.00083900  |

EuR<sub>7</sub>PhR<sub>7</sub>(NO<sub>3</sub>)<sub>3</sub> (PBE0/6-311G\*-RECP)

|   |             |             |             |
|---|-------------|-------------|-------------|
| C | 2.64951700  | -0.72098600 | -0.09992900 |
| C | 1.45872400  | -2.67553000 | -0.22008200 |
| C | 2.62816400  | -3.45546700 | -0.20996800 |
| H | 2.54705500  | -4.53449500 | -0.26380200 |
| C | 2.64938600  | 0.72148500  | -0.09983400 |
| C | 3.88204700  | 1.41147500  | -0.08213400 |
| C | 3.83692700  | 2.81752000  | -0.12928500 |
| C | 2.62752600  | 3.45597700  | -0.20948700 |
| H | 4.76291100  | 3.38469700  | -0.11263300 |
| H | 2.54621700  | 4.53499700  | -0.26316300 |
| N | 1.46629700  | 1.35446400  | -0.14888400 |
| C | 3.88230700  | -1.41075100 | -0.08233200 |
| C | 0.13811000  | -3.28677400 | -0.32093400 |
| C | 1.45823300  | 2.67582000  | -0.21972900 |
| C | 0.13749700  | 3.28681900  | -0.32050100 |
| N | -0.98265700 | 2.52090500  | -0.34367600 |
| N | -0.98220300 | -2.52109100 | -0.34407300 |
| N | 1.46654200  | -1.35418100 | -0.14904000 |
| C | 3.83744700  | -2.81679700 | -0.12968300 |
| H | 4.76353600  | -3.38380600 | -0.11311900 |
| C | -1.96026000 | -3.39449000 | -0.42563000 |
| H | -3.01383100 | -3.16112100 | -0.43216900 |



|    |             |             |             |
|----|-------------|-------------|-------------|
| C  | -1.96089600 | 3.39410200  | -0.42518500 |
| H  | -3.01441900 | 3.16051900  | -0.43177000 |
| C  | 5.10586200  | -0.67794600 | -0.03377500 |
| H  | 6.04092300  | -1.22928800 | -0.00640100 |
| C  | 5.10573700  | 0.67889000  | -0.03367700 |
| H  | 6.04069700  | 1.23040000  | -0.00622100 |
| N  | -0.09318200 | -4.58182900 | -0.39304500 |
| N  | -0.09406500 | 4.58183000  | -0.39253000 |
| N  | -1.43202100 | 4.62438500  | -0.46040200 |
| H  | -1.90367600 | 5.51159100  | -0.51751400 |
| N  | -1.43112800 | -4.62466000 | -0.46091900 |
| H  | -1.90259800 | -5.51196100 | -0.51807600 |
| N  | -1.38544200 | 0.00047900  | -2.72947000 |
| N  | -0.05925800 | -0.00051300 | 2.87085700  |
| N  | -3.70472300 | -0.00038400 | 0.90122300  |
| O  | -0.26651700 | 1.07274200  | 2.22306700  |
| O  | 0.30998700  | -0.00068300 | 4.01104200  |
| O  | -0.26697500 | -1.07357800 | 2.22289500  |
| O  | -2.33455200 | 0.00041100  | -1.88824200 |
| O  | -0.21548200 | 0.00016700  | -2.23344600 |
| O  | -1.57687200 | 0.00080000  | -3.91502100 |
| O  | -3.03236900 | 1.06752700  | 0.78053900  |
| O  | -3.03243900 | -1.06822900 | 0.77965900  |
| O  | -4.88451200 | -0.00043100 | 1.11498600  |
| Eu | -0.90006400 | -0.00011500 | 0.12228100  |

EuR<sub>7</sub>PhR<sub>8</sub>(NO<sub>3</sub>)<sub>3</sub> (PBE0/6-311G\*-RECP)

|   |             |             |            |
|---|-------------|-------------|------------|
| C | -2.60805200 | 0.87369200  | 0.11589300 |
| C | -1.29658600 | 2.74821800  | 0.20485900 |
| C | -2.41475000 | 3.60061500  | 0.18885000 |
| H | -2.26509400 | 4.67305200  | 0.22506400 |
| C | -2.69990000 | -0.56709400 | 0.11949400 |
| C | -3.97596200 | -1.17749000 | 0.10587500 |
| C | -4.01612600 | -2.58168000 | 0.14408000 |
| C | -2.84581600 | -3.29401000 | 0.20566000 |
| H | -4.97385900 | -3.09308800 | 0.13115000 |
| H | -2.86715600 | -4.37779900 | 0.24371800 |
| N | -1.56155000 | -1.27099100 | 0.15764100 |
| C | -3.79530700 | 1.63811600  | 0.09576400 |
| C | 0.06065100  | 3.27461800  | 0.28869700 |
| C | -1.62802900 | -2.59111800 | 0.21209000 |
| C | -0.33332500 | -3.25577400 | 0.28552300 |
| N | 0.82297100  | -2.61460200 | 0.27960300 |
| N | 1.12888000  | 2.43854300  | 0.31601700 |

|    |             |             |             |
|----|-------------|-------------|-------------|
| N  | -1.38785400 | 1.42908000  | 0.15542600  |
| C  | -3.66265300 | 3.03908600  | 0.12548000  |
| H  | -4.55124200 | 3.66303900  | 0.10619100  |
| C  | 2.16199200  | 3.24749100  | 0.38582000  |
| H  | 3.19805000  | 2.94581800  | 0.39208100  |
| C  | 1.74773400  | -3.60006800 | 0.35568300  |
| H  | 2.80821800  | -3.40472500 | 0.34576300  |
| C  | -5.06351000 | 0.98360400  | 0.05827200  |
| H  | -5.96150300 | 1.59353100  | 0.03183300  |
| C  | -5.15178700 | -0.37019200 | 0.06385800  |
| H  | -6.12028000 | -0.86042000 | 0.04218200  |
| N  | 0.37522100  | 4.55267400  | 0.34631600  |
| N  | 1.71315300  | 4.50935000  | 0.40855100  |
| H  | 2.24168400  | 5.36470400  | 0.45345900  |
| N  | 1.23499300  | -4.81035900 | 0.41737000  |
| N  | -0.08407400 | -4.57208300 | 0.37080700  |
| H  | -0.72386700 | -5.34766100 | 0.39519300  |
| N  | 0.00106100  | 0.04868200  | -2.84176800 |
| O  | -0.42256300 | 0.09175400  | -3.96317000 |
| O  | 0.34758000  | 1.08838000  | -2.20377400 |
| O  | 0.12756500  | -1.04684900 | -2.20700700 |
| N  | 1.37120000  | -0.00900100 | 2.72819900  |
| O  | 1.53265900  | 0.04071100  | 3.91536600  |
| O  | 2.32865900  | 0.08759200  | 1.90390500  |
| O  | 0.21957400  | -0.16015500 | 2.20705900  |
| N  | 3.74106800  | -0.22459900 | -0.86857200 |
| O  | 3.13344100  | 0.88495500  | -0.81434300 |
| O  | 4.91628600  | -0.31188700 | -1.08452900 |
| O  | 3.00577700  | -1.24361600 | -0.67758600 |
| Eu | 0.94200400  | -0.07537300 | -0.11105600 |

EuR<sub>8</sub>PhR<sub>8</sub>(NO<sub>3</sub>)<sub>3</sub> (PBE0/6-311G\*-RECP)

|   |             |             |             |
|---|-------------|-------------|-------------|
| C | -2.57009400 | -0.72820500 | -0.01097700 |
| C | -1.37290500 | -2.68771200 | 0.04170900  |
| C | -2.54689800 | -3.46190100 | 0.04526300  |
| H | -2.50032700 | -4.54437800 | 0.09172100  |
| C | -2.57343100 | 0.71731900  | 0.00647600  |
| C | -3.81112300 | 1.40050800  | -0.00181700 |
| C | -3.77137100 | 2.80561300  | -0.01280600 |
| C | -2.56280900 | 3.45119900  | -0.04829100 |
| H | -4.69919800 | 3.36948700  | -0.01344900 |
| H | -2.52120900 | 4.53394100  | -0.09324800 |
| N | -1.39628400 | 1.35857900  | 0.01652900  |
| C | -3.80461300 | -1.41709700 | -0.00445800 |

|    |             |             |             |
|----|-------------|-------------|-------------|
| C  | -0.04530600 | -3.27230100 | 0.17417600  |
| H  | -0.27572400 | -5.38876700 | 0.03420600  |
| C  | -1.38526600 | 2.68244700  | -0.04321500 |
| H  | -0.30101100 | 5.38922600  | -0.04493900 |
| C  | -0.05987000 | 3.27297500  | -0.17133000 |
| N  | 1.03602700  | 2.56156500  | -0.36012600 |
| N  | 1.04627700  | -2.55672400 | 0.37242400  |
| N  | -1.38998500 | -1.36399600 | -0.01907500 |
| C  | -3.75839000 | -2.82198900 | 0.00714900  |
| H  | -4.68359900 | -3.39014600 | 0.00668100  |
| N  | 0.44677600  | -0.52190400 | -2.81363000 |
| N  | 0.44085000  | 0.52608400  | 2.81718300  |
| N  | 3.83498900  | 0.00594100  | -0.00815600 |
| O  | -0.00536100 | -0.50958100 | 2.23807900  |
| O  | 0.24126700  | 0.75212200  | 3.97832200  |
| O  | 1.10287700  | 1.31660700  | 2.07515300  |
| O  | 1.08812300  | -1.32369500 | -2.06515100 |
| O  | 0.01890600  | 0.52449300  | -2.24047600 |
| O  | 0.24945200  | -0.74777200 | -3.97520200 |
| O  | 3.14762100  | 0.75745300  | -0.76791400 |
| O  | 3.15441400  | -0.74740900 | 0.75606900  |
| O  | 5.03159900  | 0.00741000  | -0.01185500 |
| N  | 0.29448800  | -4.57248300 | 0.17652600  |
| N  | 0.27389100  | 4.57476100  | -0.17850500 |
| C  | 2.02817700  | -3.47671300 | 0.48451100  |
| H  | 3.05936400  | -3.21043400 | 0.65560500  |
| C  | 2.01411500  | 3.48546800  | -0.47246900 |
| H  | 3.04718500  | 3.22326200  | -0.63837400 |
| N  | 1.61129800  | -4.72168700 | 0.37108400  |
| N  | 1.59090100  | 4.72907400  | -0.36749200 |
| C  | -5.03209900 | -0.68910100 | -0.00415600 |
| H  | -5.96567000 | -1.24328600 | -0.00306500 |
| C  | -5.03523500 | 0.66684300  | -0.00406500 |
| H  | -5.97135600 | 1.21669700  | -0.00649100 |
| Eu | 0.94886400  | 0.00172700  | 0.00243800  |
